# Supplementary material for: Transcriptome Profiling of Atlantic Salmon Adherent Head Kidney Leukocytes Reveals That Macrophages Are Selectively Enriched During Culture
Source: Front Immunol. 2021 Aug 16;12:709910. doi: 10.3389/fimmu.2021.709910 (PMC8415484; doi:10.3389/fimmu.2021.709910)
Supplement: Supplementary file 3 [file Table_3.xlsx]

## Sheet: Sheet1
Supplementary Table 3. Complete list of DEGs (FDR < 0.05)
ID1		Symbol2	SwissProt_BlastX3			NCBI NR_Blastn4
Unique identifier	Location ID	Gene symbol	blastx_gene	blastx_alias	Gene_description_based on_Blastx	blastn_gene	blastn_alias	salmon_stats5	trout_stats6	Gene_description_based on_Blastn	60 mer contig7
CUST_24710_PI417904088	C227R073	LPL	LPL	LIPD	Lipoprotein lipase (LPL) (EC 3.1.1.34)	LOC106573546	-	XM_014148678.1,100,100.000,60,2.54e-24	XM_021579881.1,100,96.667,60,3.84e-21	lipoprotein lipase-like (LOC106573546)	ggggTGCAGCTCCAAGGAGGCCTTCATGAAGGGAATGTGTCTCAACTGCCGCAAGAACCGTTGCAACAAGGTGGGCTACGGCGTCAACAAGGTCCGCCTGCCCCGGAGCACCAAGACGTACCTCAAGACCCGCGAGATGATGCCCCTCAAACTTTTCCATTACCAAGTGAAGGTGCATTTCTTCAGCAGCGAGAAACTGGACTACACTGAGCAGCCCATGAAAATCTCTCTGTACGGAACCCATGATGAGAAGACAGACATTCCCTACATCATGCCCTTCCTGAACACTAACAGCACCGTGTCCTTCCTGCTGACCACCGACGTGGACATCGGGGAGCTGCTTATGGTCAAGCTGCGTTGGGAGAAAGGCGCTTACTTCAGCTGGTCTGACTGGTGGGG…
CUST_8331_PI417904088	C180R145	LIPE	LIPG	-	Endothelial lipase (EC 3.1.1.3) (Endothelial cell-derived lipase) (EDL)	LIPE	-	NM_001140535.1,100,100.000,60,5.18e-26=XM_014143480.1,100,100.000,60,2.54e-24	XM_021622239.1,100,100.000,60,1.77e-24	lipase, hormone-sensitive (lipe)	gggggaggtcactcaactctcactgctCTCAGGCGCACACGGACCACCGTCTCGCTGATACTTGGCTCATTGGACATAAACTCACTGGACACACGAATAACTGTTAAAGAGCCCGTTATTATCTTTACATCTGTTTGTGTGAGAAAGAAATGAAAAATATCACTTTTTCTTTGTGGATTGTGCTACTTTGTGAAATTGCGCTCTTTGCGTCGGGAGTGGAAGACAACGAACTTTTCAAAGATGAGGAGTTTAAAGTGCTCTACGGTGACGAGGCACTCCATGACCGGATCACATACAACATGAGGAAGAGCATGAATCTAGACGTGGACGGCTGCATCCTTCTGCCTGGTGAGAAGAGGAGTCTGCAGGAGTGTGGCTTCAACGTCACAGCCAAGACCT…
CUST_2620_PI417904088	C013R127	RTN3	RTN3	-	Reticulon-3	RTN3	RTNT3	XM_014155629.1,100,100.000,60,2.54e-24	XM_021615315.1,98,98.305,59,2.97e-22	reticulon 3 (rtn3), transcript variant X2	gggggagtgccctccatccacacagtgcttGGTACATGCGCGTGAAGGTGCACAGGCTCGGTGACACTGCGTCCAGGTCTTGGGGAATACGAGGCAAGTTGGAAGAAGACATTTTAAGGACAGCAGTAATACACTACAAATTCTCGCCGCCACCGTGCAGAATTTTTTGAAATTATAGTAAAATGGCAGATCCAATGACCCAGTCCGCCCAGATATCATCGTCGCAGGGGCTGGCCGATGGACAAAACTCTGTTGCGGCCAAAGACTCAAAAATGTCCGTCAAGGACTTGGTGCACTGGCGAGACCCCAAGAAGTCTGGCGTGGTGTTCGGCCTGTCCCTGCTGACGCTCCTGTCCCTGGCGGCGTTCAGCGTCATCAGTGTGATCTCCTACCTGCTCC…
CUST_24471_PI417904088	C207R058	ITPR1	ITPR1	INSP3R1	Inositol 1,4,5-trisphosphate receptor type 1 (IP3 receptor isoform 1) (IP3R 1) (InsP3R1) (Type 1 inositol 1,4,5-trisphosphate receptor) (Type 1 InsP3 receptor)	LOC106582863	-	XM_014166426.1,100,100.000,60,2.54e-24	-	inositol 1,4,5-trisphosphate receptor type 1-like (LOC106582863), transcript variant X15	ACATACTGTATATTTTATTAAATAATTCTACATTATTTTACAATTCTGACAGTACTTAACTATTTTAAATTAGTCCTTTGAACATTCATTTCCAGTAACACCGCTTTAAATTCCATATTACCTTTCTGAAAACGTAGGTCCCTATACAACAACAATGGCTTAAGCGACAATGTAAAAAAAAACTGAAATGAGTTGAACAAAGTATTAAACAGCAAAACTGAGAACTCAACAGCTGTGCTGAACGTAAAAACAATGAAAAACACAATGACTTTGTCACAAGTAGGTAATCAGTAGCCAAATATACGTCTTAAAGGGACAAATGGCACATATGATAGGTGTATATTTAAAACATGACAAACCTGGACGATAGATGCTAATAATATTTAGTGCAATAAAATG…
CUST_4908_PI417904088	C222R040	C3AR1	C3AR1	-	C3a anaphylatoxin chemotactic receptor (C3AR) (C3a-R)	C3AR1	C3AR, C3A-R	XM_014138664.1,100,100.000,60,2.54e-24	NM_001124403.1,100,95.000,60,1.56e-21	C3a anaphylatoxin chemotactic receptor (LOC106568372)	CAAAGATGGGGGACAACATGGATTTCTCAGAGCATTATGGGAATTTCTTCGAGAATTATGTCACAGAAGATCATGGGGAGTCTAACTTGTATTATGACCCATTATTTGGAACCTCTGTGTCAGAACAAGGGCATTTGTCCATACGGGTGGTGTCCATAGTTCTCTGCAGCATTGCTTGTGTCCTCGGTATCCCAGGCAACGCCTTTGTCATCTGGATAGCTGGAGTGAAGATGAAGAGGACAGTCAACACTGTCTGGTTTGTAAACCTGGCTGTAGCAGACCTCCTCTGCTGTGTCTCCATACCCTTCTCCATAGCTGACATCATACTGAACCAACACTGGCCTTATGGAGAGGCTATGTGTAAGATTCTTCCATCCATGGTCGTCCTCAACATGTTCG…
CUST_41295_PI417904088	C040R080	#N/A	-	-	-	-	-	-	-	0	0
CUST_34392_PI417904088	C033R019	NPEPL1	NPEPL1	-	Probable aminopeptidase NPEPL1 (EC 3.4.11.-) (Aminopeptidase-like 1)	-	-	-	-	0	GAGAGAATGTTTTTTTTTTTATTAAAAAATTCACTGCATTGTGAATGAGTCGAATAAAAATTGAGGATTGAAAATGCTTTCTATGTGTTCAGTGCATGTCAGTGTAAAGAGTGGAGGTGGGTGAGTCCAGAGGTGGCTGCTTGGAGGTTTTACACCAGTCTCCTCCTCTTGCAGTCGCGCTCCACCGGGTTCCTGGATGCAGCCTTCATGGTAGCGGCCCCCAGAGGAGACACCTGGTTGAGCATAGGGTCATCTGAGGCCTGGCCGAACAGAGCCACGCCGAAGCCAGTAGTGTGCTCCCCAGCATGGACAGGGAAGGCTATGTCCACATGGACCCAGACCCCAGGCCAGTCAAAACCCAGGTGAGAGCCAATGAAGAGGCCGGCACAGGAGCTCGTG…
CUST_11479_PI417904088	C050R020	LRRFIP1	-	-	-	LOC106563403	-	XM_014128936.1,100,100.000,60,2.54e-24	NM_001124267.1,100,96.667,60,3.35e-23=XM_021602864.1,97,100.000,58,2.29e-23	dentin sialophosphoprotein-like (LOC106563403)	aaACTGAACTGTGCTGTTCCTCCTCTGGCATCCAAGAGAATAGTGAGCAGCTCTCCACTCATCCTGACTGACTAGTGTAGTGCTATCCTGTGGATTCTCTGACGAACAAATCCAGATACACATTGTGACAATGAAGGCTGCAATTGTTTTCACCCTGCTCTTTGCAACGGTCCTCTGTCGCCCGGTGAAACGCTCATCCAGCAGCAGTTCAGAGAGCTCAGAGGAAGTGGTTAAACCAGCTCCGGTGCTTCGGAAAGCCCTAGTAGATCTCACCCAGGTTGCATCTGTACAGAATGTGGGTGCTGGTACAGCATCAGACGAGAGCTCCGACGAAGATGAAACAGAAGGAGCTGATCCTACATCAGACCCAACAGTGGACAGCACATCATCGACAGACAG…
CUST_13977_PI417904088	C232R105	FADS2	-	-	-	LOC110521170	-	-	XM_021598609.1,100,98.333,60,8.25e-23	fatty acid desaturase 2-like (LOC110521170)	ACACATTGGATTGTTTTTATTTATGTAGCTTAGCTACAGTATCATTAAGGTAAAAAGCAAACATTTCCATTCATTCATTTAAATACATGGCAACATATATTTATGAAATATATTTGGGCATTTATTTTACTAGCTACCACAGCATGCTCTCAAAATGTATTTCCATATATTTAAATATATAAACATATATGTAGAAATATATCAAAAAGGCCAATTTTGTAATATGTCCATATATTTAAATATATGTAATATAAGGCTTAAACACATATTTATTTTAATATACGTAAATACATAAATGTTGTTCAAACAGGGTGGCACCAATGATTAGGGCCAGGCGTTTTGGTTGTTCTTCAGTTGTTGTTTTTCTACCCCGTGTCCGATATAGCACTTTCTCACACC…
CUST_654_PI417904088	C230R035	ANKS1B	-	-	-	LOC106609565	-	XM_014208508.1,100,100.000,60,2.54e-24	XM_021576966.1,100,100.000,60,1.77e-24	ankyrin repeat and sterile alpha motif domain-containing protein 1B-like (LOC106609565)	ctccgcctacctgagcaaaacaccatccatcccaattaaagaaatattcatattaatgccggacgttttaaatgtttcatATGAGATTACCTTATGATTATTCTTGTGCAATTCTTGTCTACTCTTAATGTTACATTATTTTTATATGATATGCTGAAATGAAAAAATCCGGGCTTGAGAATGATTGCCATCCTTTAAAAAATAGCATAATAGTTCTATACTGAGAGTGAATATTTCAGATGGCTCCTCTCCTTATTATTAATAATAGCTATTATTTGTATTATTATTATTGGTGTGTCCGGTCAACACACCAATCTGTTTCTCATGGGGCTAGACTCATAACTCCAAGCAGATGGAATATTTTACCACAGTATTTCTGTATTCTTTGGATGAATACAT…
CUST_35302_PI417904088	C023R081	SMPD3	-	-	-	-	-	-	-	0	gagggtagtgaggatatcagatgcaatccctcaataagaattttaatcaccgattgtttgggttgaaagcctggtctccaGGGCGATAAGCATGTTCCCCTGACGATGCAATCTCAAATGCTGCCAATGCAATGAGTCTGCATGAAATGCCACCCTGCCAAAACCCACAAACACACACACCTGCACACTCATTACATACACAGACACCATTGGCACTGATGCCTGCCTCATTTGTGACAACACCTTTTTACTCTCTCACCTGTTCTTATTGACACTGTTGCTATTGCTGGCTGTATCACAGGATGATAAGGGATGTGTGTATGTGTGCAGAGCTGGCTTTGGGATATGTGACGACTCCATGTCCCCCTTTAGCATGGTGCAGTATTTATAGATCTTATT…
CUST_33411_PI417904088	C105R153	ADRB2	ADRB2	-	Beta-2 adrenergic receptor (Beta-2 adrenoreceptor) (Beta-2 adrenoceptor)	LOC106603939	-	XM_014198193.1,100,100.000,60,2.54e-24	XM_021617403.1,100,98.333,60,8.25e-23	beta-2 adrenergic receptor-like (LOC106603939), transcript variant X2	GTGGACAACGAGGCTGAGGCAGTGCTGCTGGGCATCATCATGGTCCTGCTGGTATTGGGCATCGTCTTTGGCAATGTGCTAGTCATCACCGCCATTCTTCGTGCTCAACGTGGCGGTGACCATCTGGAAGGTGGACAACATTAAAATGCCATTCAGGATATTGAACTGGATAGGATACGCCAACTCGGCGTTCAACCCCCTCATATACTGCAGGAGCCCTGAGTTCAGGTACGCCTTCCAGGAGATTCTGTGCCTAAGAGGGACTGCTTTCCCCACTAATGAATACATATACAAAGGACACAGCTTGCAGGTTAGCCCTAAGGATAAGCCAGGCAGCTCTATACACGATAGTGGGACCATGGAGCTGAGTACTGGCTCTCGGTCTAGTGTCACCAACAC…
CUST_36258_PI417904088	C114R090	IFIT5	IFIT5	ISG58 RI58	Interferon-induced protein with tetratricopeptide repeats 5 (IFIT-5) (Interferon-induced 58 kDa protein) (Retinoic acid- and interferon-inducible 58 kDa protein) (P58)	LOC106578962	-	XM_014158291.1,97,86.207,58,9.33e-09	XM_021575342.1,100,100.000,60,1.77e-24	interferon-induced protein with tetratricopeptide repeats 5-like (LOC106578962)	GGTCCGGAATTCCCGGGTCGACCCACGCGTCGGCTGTATCAACAAGATGAGGAAAGAGGCCCCTTCCAATCATTTTCTATTTTGGCTTTGTTGAAGTCCTTCTTTGTCATCCCCAGTCAAGCTGAATAGTACCATCTCCTGAGTGCCTCGGTCAAAGCAGATATGGAAGTTAAGCTGAAAGCACTTGAGTGTCATTTCACATGGGGCATAAGGAAAGGTGACATTAAGGAACTGGACAGCCTCCCTGAAAAACTCCTGGATCGCATCATGAGGTTTACCACGCCGAAATACCATGCCACATATTTCAACTTACTAGCGTTCCTGAGCCACCTGGAGGAAAATAATGTTAGTGCTCTTGAGTATCTCCACAAGGCTGAGAGTGCATTGAAGGACAGACAG…
CUST_27138_PI417904088	C063R006	TSPAN7	TSPAN7	MXS1 TM4SF2	Tetraspanin-7 (Tspan-7) (Cell surface glycoprotein A15) (PE31) (TALLA homolog) (Transmembrane 4 superfamily member 2) (CD antigen CD231)	LOC106604762	-	XR_001328726.1,100,100.000,60,2.54e-24	-	tetraspanin-7-like (LOC106604762), transcript variant X2	cgcgccttggacattattttcttccccttTTTGCAACAACGATACTTTTTGACTGACCATTTCTACGGAATAGCCATCATGTCTCCCCCATCAAGAAGGCTTCAAACGAAGCCTGTGATCACATGTCTCAAGACCTTTCTTATTTCTTACAGCGTCATATTTTGGTTTACAGGGGTTTTCCTTCTGGCTGTTGGCATATGGGGGAAGGTGAACCTGGAAGCTTATTTGAAGCTGACCTCTGAAACGAGCACCAACATGCCATATGTCCTCATCGGAACTGGAGCCATCATTGTTATTTTTGGCCTTTTTGGTTGCTTCGCTACATGCCGTGGTAGTCCATGCATGCTAAAACTGTATGCCACGTTCCTGATTTTGATGTTCTTAGTGGAGTTTGTGGCT…
CUST_13951_PI417904088	C113R129	MFAP4	MFAP4	-	Microfibril-associated glycoprotein 4 (36 kDa microfibril-associated glycoprotein) (36 kDa MAP)	MFAP4	-	NM_001141245.1,100,100.000,60,5.18e-26	XM_021557923.1,100,100.000,60,1.77e-24	microfibrillar-associated protein 4 (mfap4)	GCGAGGAAGGATCACAACTTTGGACAACTTTCCCAAGGTCATTTTATCCTATCAGAGAAATAATGAAGGCTTTGGATGTGCTCATTCTACTACTCCCAGTGGCAGTCAATACTCTACCGTACGATATCATGCCAGTGGATTGTGCTGATGTGTATAGAAGGGGCTTTGGACACAGTGGAGTGTACACCATCTACCCTGCAGGAACAACCTCCCCCATCCAGGTCTACTGTGACATGGGCTGTGAAGACCAACCTGGGGGGGGGGAAATGGACAGTGATCCAGAAGAGAAAGGATGGGACAGTGAACTTTTACCGTGGATGGGACCAATACAGGAGTGGGTTTGGGCAGGCATCTGGAGAGTACTGGTTAGGCCTAGAAAACATCCATCTCCTCACTCAG…
CUST_41492_PI417904088	C228R013	TLR3	-	-	-	TLR3	-	-	NM_001124578.1,100,100.000,60,1.55e-26	toll like receptor 3 (tlr3)	GTCAGAATCCAACTTTACTGAAAACTTTAAAGACATGCTGAACAGCATACTGATGGAAAAAACAGAATGTGTTCAAATATACTTGCAGTTTACTCAAATCAACACTAGGTGTCATGAGACAAATACAGACATTTTTGTTGAACCATACACTATTAAACAAAATTCTAACTTTCAAGTAAGTGTACAAAAGTCCTGAAACAAATATTTAATATAGAGTTGTCCCAAACCCTTAACCTGAAATGACCTAATTAAAGCAGTTCCCACAGTGGAAAAATAAGAATATGTAGGTTTGTTAAAGTTCTAAATTAATCTGACATTTCAGTTATGAAGAGAACATTACATGGTTAATGTGTGCAATAGTGGGTTATTTTACAGTGTAGTTGTAATACTCCTGCTAGC…
CUST_25400_PI417904088	C066R040	FADSD5	FADSD5	-	Delta-5 fatty acyl desaturase	FADSD5	-	NM_001123542.2,100,98.333,60,2.41e-24=XM_014170388.1,100,98.333,60,1.18e-22	-	delta-5 fatty acyl desaturase (fadsd5)	AAAGAACAAAGTAAGGCATTTTTAATTTGCTATAGAATAAATTATGAGGATATGGCTTTTGCAAGCTCCAACATCCCTCTCTAAAAAGTTGACAATCCCAAATTGCGTTTATTCATTAACACACGTAAAGAACGGAGCCGCAGTCCGGTAAAAACACAACGGAAAGCATAGTAACGGACAAATCCACTGACACACATTGTGTATGGGAGCTGGGTGAAGACGTTAAAAACAGAGATGGATAAATTGGGTTATTTCTATAGTGAATGAAAATAGGCGAGCCATTAGTATTCTGAAAATAGTCTATATTTCACCCTCTACATTTTCTGATAGAAAAATGCCTATCATACCCATATGTTATTAACAGACAACGATTACGTTGTGAAATATTGTTGTTGATTG…
CUST_1310_PI417904088	C256R079	SLAMF8	SLAMF8	BLAME	SLAM family member 8 (B-lymphocyte activator macrophage expressed) (BCM-like membrane protein) (CD antigen CD353)	LOC106577850	SLAF8	XM_014156243.1,100,100.000,60,2.54e-24	XM_021614817.1,100,96.667,60,3.84e-21	SLAM family member 8-like (LOC106577850)	ctagaacagcagcgctcatcaaaggaaatctcttctctctcttctctactcttctcagtgcgtgttttggTGAGTCTAGCTAGCTACGAGTCAGTCACAGAGAGATAGGGAGGACGTAAAGACAGATGAAACAGACATACAACACCTAACAGAGATGTCTGGTGGTCCCCTCTCCTCCTTCTCCAAACAGGGAATACTCCTACTCTCTATCCTCCACTATGGTGTGGGTATTTCTCTGTTCAACAAAGCAGTGGGGGACTCTGTGGAGCTGCCCTCAGGCTTAGAAAGGGAATGTATCAAGTCAATGGAGTGGAAGTATAAAGAAATGGTCATTGCAGAATTTGATGGGAACGTTTCCTTACCAAAATCACAGTTTGAGGGGAGACTGGAGATGAACGA…
CUST_25781_PI417904088	C181R077	IER5	IER5L	-	Immediate early response gene 5-like protein	LOC106562884	-	XM_014127955.1,100,100.000,60,2.54e-24	XM_021590447.1,100,98.333,60,8.25e-23	immediate early response gene 5-like protein (LOC106562884)	ggggCACGCACGTAGTGACTACTGTGGAGAATGGGTACCTTCACCAGGACTGCTGCGCGTCTCTCCAACAGTGCTGCCAGGGCGCACAGTACTCAGGCAAGAAACGCAAGGTTGACTTTGAATATTATATATCCGATATTGAGGAGGTACCGGATTTTACGCCGTGTAAAAGAGCGAAATTTGAGGATTGTTCCTATGCAAATTCGGAACACTTGGACACTTCGAACATTTCCAATCTGATCTCGATCTTCGGTTCGGGGTTTTCGGGGCTGGTGAGCAGACAGGCGGACTTAGAGCAAGCCTTAGCCTTGAACGGACAGTTCTGTAGCAAACAAGCTCTATCGAGTCTTGGGGCATGGACTAGAGCTATAGTAGCTTTTTGACTCCATGGTAAACTAG…
CUST_25402_PI417904088	C083R028	ETV4	ETV4	PEA3	ETS translocation variant 4 (Polyomavirus enhancer activator 3 homolog) (Protein PEA3)	LOC106589303	-	XM_014179095.1,100,100.000,60,2.54e-24	XM_021576022.1,100,100.000,60,1.77e-24	ETS translocation variant 4-like (LOC106589303)	ctaccatcggcagcactcagatccctgtctgccctacctgcagcagagcttcaagcaggagcatctggaccctctgtatgAGAGGGCTGCCCACATGGCAGGACAAGGACACGGGCCTGGGCCAGGGCTTGGATCAAGGCACGGACCACACCCACCTCACCAACCCCAACACTCCCATCCCCATCCTCACAGGTTCCCCTCTGCCCACATGATGGTGAAGCAGGAACCGACTGACTACACCTATGAGCCTGACGTGCCTGGATGTCCTTCAATGTACCACCACAACGAGGGGTACCCCAACCCCCAGCACAACAATGAAGGCTCTCTCTTTGAAAACGACTCCTGTGTCGTTCCGGAGAAATTCGAAGGTGAGGTGAAGCAGGAAGGGGGTAGCGTGTT…
CUST_15040_PI417904088	C219R022	XAF1	XAF1	BIRC4BP XIAPAF1	XIAP-associated factor 1 (BIRC4-binding protein)	XAF1	-	NM_001141454.1,100,100.000,60,5.18e-26=XM_014162058.1,78,100.000,47,4.28e-17	XM_021587572.1,100,95.000,60,1.79e-19	XIAP-associated factor 1 (xaf1)	gggggtatgctatttCCTATGTCTCCTAGGACGGGTCGCACCAGTTGGGCGTAAAACGATTGGTTTTATACGCTCGGTCGGGCGTAGCTACTGGTTTTGGAATCAGAATTGACAGGTTTCCGCGATGGCAGACAAGGAAGAGGACACAACCTGTGTCTGTGACCAGTGTCACAAGGAGGTGGCTGTGTCCAACTTTGCCTTGCACGAGTCCCACTGCCGGCGGTTCCTATGCCTGTGTCCAGACTGTGATGAGCCGGTTCCCAGAGAGCTATTGGAGCTGCACCATCAGAACCAGCACGCCCAGGTGAAATGCACCAAGTGCAACAAAAAGGTGGAGCGTTGCCAGCTACTGGACCATGAGTCAGACGAGTGTAAGGAAAGGCTGCAGTGCTGTGAGTT…
CUST_9226_PI417904088	C078R048	TRAM2	TRAM2	KIAA0057	Translocating chain-associated membrane protein 2	TRAM2	LOC106607554	XM_014204593.1,100,98.333,60,1.18e-22	XM_021600043.1,100,96.667,60,3.84e-21	translocating chain-associated membrane protein 2-like (LOC106607554)	gggggCAGCTGAGGCGGTGGCGAGAGTTCAGACACGAACAGGCCTCTAGGAAGAGGGTCGCTGCCAAGCAAACCCCCCGACCTCTTAAGAGAGACTCCCTTGGCCAGCATGAAAATGGCGTGATCAAAGCCGAGAATGGAGCATCTCCTCGGCCCAAGAAGATCAAGGCCCCCTAATGTCTCTACCCGGAATGGCTGCCCTAACAGTGGCCCTGATTATATGGCTTATCAATCAGAGGAACAGGAAACTGGTCCCACACGGTTCATCCTCTTCCTGTTTTGCGTGTTCCGGAGGTGACGCGGGGCCTGGGTCTGTCGCTATGGACACAACACGGCTTTAAAAATGCTGGATGAAAATCCAAAACCAAACCCCCCTTGAGCCCTGAACAGACATTTACTC…
CUST_7429_PI417904088	C124R117	CADM4	-	-	-	-	-	-	-	cell adhesion molecule 4-like (LOC110510240), transcript variant X3	GGGGAGAGCAGAACTGTTGTTTCTGTTCTTTGAATTCTCTCTCTCTTTCTCCCTCCCTCGCTATTCACCTCTCTTTCTAGTCCTCTTCTTCTCCCTTGTTCCCTCCCTCCCTCCCTCTCTCTCTCTGTCTTTATCTCTCCTCTATTGTTGGCCAATAAAGAAAGGATTAGTGCCGTCTCCTTTCGTGAGTTAGAAGAAAGGGAACATAAGTCGACGAGACACATTAAGGAAAAGCATAATTATTTTTAAATGCCCTTAAAGGGATAAAAATGTTAAAATGTCTTAAAGAGAAACAAATGAGTGAAAGGAAAGTAATGAATAAGGAAAAATAGATGATGGATATTTTTCTGAATGCCAAGCATATATACACACACACACACCACACACACACACACACAC…
CUST_3553_PI417904088	C184R135	ITGAE	ITGAE	-	Integrin alpha-E (HML-1 antigen) (Integrin alpha-IEL) (Mucosal lymphocyte 1 antigen) (CD antigen CD103) [Cleaved into: Integrin alpha-E light chain; Integrin alpha-E heavy chain]	ITGAE	-	XM_014214327.1,100,100.000,60,2.54e-24	XM_021582517.1,97,98.276,58,1.07e-21	integrin, alpha E [antigen CD103, human mucosal lymphocyte antigen 1; alpha polypeptide] (itgae)	GGGGCGGGTTGCTATGACTGCTTCTCACCGATAGAGATCAAGCTAAACTTCAAGTTGAATACCACTGAACCACCTCTCCGCATTCTGGATTTCTGTACTCCCACAGAGTTCACAGAAAAGATTCAATTTGAGAAGGAGTGTGAGGTGAAAGACAAATGCAAGGAAAACATACCCCTATCTGATTCAAGGCTGAGCAAGGACATGGTCATAATCGGAACGACCCAGAACTTGATGATTGACTTCAATCTGACCAACGTTGGGGATAGTGCCTACATGACAACACTTGTCCGGGCATATCCCAACATGCTCCTTTTTAACAAGTTCACAATGAAAATGGAAGGGTCTGTTTGTGAGAACCAAGTTAAGGAGAATATTTCTTATTTGAAGTGTCGTCTCTTA…
CUST_26149_PI417904088	C206R134	GPR137B	GPR137B	TM7SF1	Integral membrane protein GPR137B (Transmembrane 7 superfamily member 1 protein)	LOC106586117	-	XM_014172994.1,100,100.000,60,2.54e-24	XM_021557341.1,100,95.082,61,1.79e-19	integral membrane protein GPR137B-like (LOC106586117)	tcttcttggcggtcagttttcTCTTCCTGGTGGTCAACCTGGCCTGTGCCCTGCTGGTTAAGATGACCGCCACCGAGGTCAAGACCATTGTCCTGGTCAGAGTCACCATCAACGATACGCTCTTCGTGCTCTGTGCCATCTCGCTGTCCGTCTGCCTTTACAAGGTGGCTAAGATTTCCCTGGCCAGCATATACCTCGAGTCCAAGGGAACGTCGGTGTGTCAGGTGACATTGATTGGCATCCTGGTGGTTCTGCTGTACGCATCACGGGCCTGCTACAACCTGGTGGTGCTGGCTCTGACTGACATTGAGACCATCAACTCTTTCGACTACGACTGGTACAATGTGTCCGACCAGGCTGACTTGAGATCCACTCTGGGGGACGCTGGTTACATCGTGT…
CUST_22343_PI417904088	C134R112	RNF138	RNF138	NARF	E3 ubiquitin-protein ligase RNF138 (EC 2.3.2.27) (Nemo-like kinase-associated RING finger protein) (NLK-associated RING finger protein) (hNARF) (RING finger protein 138) (RING-type E3 ubiquitin transferase RNF138)	RN138	-	NM_001140976.1,100,100.000,60,5.18e-26	-	E3 ubiquitin-protein ligase RNF138 (rn138)	gggggagtACAGTAGCTGCCTCATACACACCACACCTGCCCCAGGGGAGACTGTAGTGTACTCTGTCCTGGAGAGAGAATCTGTCCCAGCCCAAGTATGGCCCACTCTGCAGCCGGCCTTCAGACCCCATCTGAGGATGAGTGTCCCGTCTGTATGAGCACCCTGATGGACCCACATCACCCTGCTGCCTGTTCTCATGTGTTCTGCCGACAATGTCTGACGCACTCTTTAAAGTGGTTACCCCACTGCCCTGTGTGCAGAGCTAAGGCGCAGGTTGATGACATTATGCCTGCTGGTGCCACTGTTGTCACAGTCCAAACGAGGACCACAGTCATCAGGTTGGATCAACCTCTCTCTGGCTTGATGGGGCTTTCAACCCCAGCAACTAGACCTGTGACA…
CUST_41445_PI417904088	C234R046	CAMP	-	-	-	LOC100136453	CATH-1A	XM_014190921.1,100,95.000,60,2.56e-19	NM_001124480.1,100,100.000,60,1.55e-26	cathelicidin (LOC100136453), transcript variant X1	gctttcgagcggccgcccgggcaggtTGAAGGTCCAGGTGAGATCTCTCATCCTGCTCGCTGTGGCTGTCCTGCAGGTCAGATCTCAGAACCAGACTGAGACCAGATATGAAGACATCATCTTAGTTGCTTTGCCTCAGCTGCTTCCTGGGGAAGAGCAGGCTTTCCGTCCAATTCTGAACCAGCTCCAAGTCAAGACTTTGAATACAGAGGATGTGGACCAGTCTGAGGTGTCTGTAAGGCTGACCTTCCCCAT*ACAGGA*GACTTTCTGTAGTAAATCACAGGGGC*AGCCAGGCAAACCATGCCCTCTGAAGAAAAATGGGAAA*CTAATGATGTGCAGCATGAAAGTCAGAC*AT*CCGATTCTGGAGGCAAGCAACAACCTGAACACT*GACC…
CUST_27087_PI417904088	C233R014	ZCCHC8	ZCCHC8	-	Zinc finger CCHC domain-containing protein 8 (TRAMP-like complex RNA-binding factor ZCCHC8)	LOC106585281	-	XM_014171335.1,100,100.000,60,2.54e-24	XM_021606059.1,100,98.333,60,8.25e-23	zinc finger CCHC domain-containing protein 8-like (LOC106585281)	ttgggttGATTTTGGTGACTGTGAGCTCTTTGAACAATTGGAAGAGAGTATGCCTGTTGCTACTCACATTCGGTTTACGGAGGAGGGTGGAGAGGAAGGCTCTGAGCTCAATGAAAGATTGGAGGAGTGTGAGGAGACAATCCGGAGTCTAATAGAAGAGAATCAAGAGTTGAAGAGAAAATTGAAAGTTTTCGCAAGGCCAAGTGGCATTAATGTTGAAAACATCAAGATTGATGGGCCTCTTCTCCAGATCCTTTTCGCAAATAATAGCATCTCAAAGCAATGCCGTCAAGAAATTGAAGACTCCATCTGTAGTATTGTTCAGAAACATCAGCAGCAGGGAGAAGTTGAAAAAGGAAATCCCTCCGGCAATGTCAACCCTCAGTCTTCAAGTTTCAT…
CUST_20838_PI417904088	C144R069	SCARB2	-	-	-	LOC106568513	-	XR_001320313.1,100,100.000,60,2.54e-24	-	lysosome membrane protein 2-like (LOC106568513), transcript variant X3	atggttcaccttcactttcaacttgcatgtggtgatattttgcaagtgagcatttttaagtgttacgtatctgatattccAAATGTGACATCTTGCCTACATTCCTTAGGTGAGACACCTGTACCCCAGTTGGTATATTCATTAGGTGAGACGCCTGTACCCAGTTGGTATATTCATTAGGTGAGACGCCTGTACCCAGTTGGTACATTCCTTAGGTGAGACACCTGTACCCCAGTTGGTATATTCATTAGGTGAGACGCCTGTACCCAGTTGGTATATTCATTAGGTGAGTGTTGATCTGTATCGGTCAGATCTATTAAAAACAATACCACATCATTGGCTTATTGCTGCCATTGTGTGAACGAGCCAACAAACCTATGGCACTCTGTATACTGCGTA…
CUST_22205_PI417904088	C066R125	CYP7B1	CYP7B1	-	25-hydroxycholesterol 7-alpha-hydroxylase (EC 1.14.14.29) (Cytochrome P450 7B1) (Oxysterol 7-alpha-hydroxylase)	LOC106599438	CP7B1	XM_014190675.1,100,100.000,60,2.54e-24	-	25-hydroxycholesterol 7-alpha-hydroxylase-like (LOC106599438)	TCTTTTTTTTTTTTTTTTTTTTTTTTTTTTTTTTTTTTTTTTTTTAAATGGAGTCGTTTTATTACCAGGGAATGCATTAATGACAAACAACAATCAGAACGCTGTACTCACACAAGAGAGTTGGTCAAACAAAATAATTCCTCTGAGCATATAGTTAATAACGTTGCAGATTCACTGGATCCATTAAGAGAATAGGTCACTATTGGTAAAAATGTAAGGAATAAAATGACTGCCACATGCAGAACTGATTTGTCCAGTTTGAATGGATTTTATTTCATGAATTGTAAATAGTAAATACCCTGTAGGACTCTTGAAATAGGAAAGACATTTGAATGTATAACTTTAAATGGTTAGTTATTTGGTTAATGTTATAGAAAAATTAAACTAATCAATCAGTAA…
CUST_13169_PI417904088	C256R113	C3AR1	-	-	-	LOC106568372	-	XM_014138664.1,97,100.000,58,3.29e-23	-	C3a anaphylatoxin chemotactic receptor (LOC106568372)	GATCAAAATAATTGATTTAATATATAAAATATGCAACTGAGATTGAATGGTATAACATGTAAGTGTAATTATTGTCCACATCAACACACTACAGCATTGACCGGCCAATGATATTCATACAGGACATAGAAGGCAGATTCCAAGTTTAAGGATAGAAAAATAATTACTGGAACGGACATTCCCTTAAGTGTACTTCCACATTGTTGTGGTCTGAGGGGATTTGTCCATTCTAGTCATCCTATTTATATGGCTCCTACATCCATTAGGAGGAATGTAAAACAGGGAAGATAAAAAGGGAACTCGGGGTGAAATGTAAGTTTCAGTTACACAGCAGAGGATTAGCTAATAGTTGACTAACTCCTGTCCCAATTAAACTCCAGCCCACCCAATGAGTCATCA…
CUST_16892_PI417904088	C202R049	IL4I1	-	-	L-amino-acid oxidase (EC 1.4.3.2) (Antiparasitic protein) (APP) (Serum L-amino-acid oxidase) (SR-LAAO)	LOC106612549	-	XM_014213791.1,100,100.000,60,2.54e-24	XM_021582282.1,100,98.333,60,8.25e-23	L-amino-acid oxidase-like (LOC106612549), transcript variant X2	gggggACTGAGCAAAAAACGCACGAGCCTACAGAGGTCATTCTCAGCTCTACTGGTTGAATTAACCCGACTGTAACCAATCCCTGTTACTGCAATGGACGGCTTTGATTTAAATTCGTCAGAAAAGGCTGATGGTTCAGAGCTCCAAAGGATGATCGCAATTGAACAACAGAAAGCGCAGTTTCAGGCCCAGGTGCATAACTTCACTGATGTCTGCTGGGACAAGTGCATGGAGGGGAGCCCGAGTTCAAAACTGGATTCACGGACAGAGACTTGCCTCGTGAGCTGTGTTGACCGCTTCATTGACACTACCTTGTCTATAACCAACCGGTTTACGCAGATGGTGCAGAAGGGTGCCCATTGATAGGAGCTAGACTATGGGAAATAGACTGTGTTTTAT…
CUST_29154_PI417904088	C124R028	BRCA2	BRCA2	FACD FANCD1	Breast cancer type 2 susceptibility protein (Fanconi anemia group D1 protein)	BRCA2	-	XM_014213431.1,100,100.000,60,2.54e-24	XM_021563165.1,100,98.333,60,8.25e-23	breast cancer 2, early onset (brca2), transcript variant X12	GGTGTTCAACCACTACCGCTGGGTGGTGTGGAAACGGGCCTGCATGGAGAGGGCATTCCCAGCGCTGATGGGCAGCCTCTGTCTCACACCAGAACAGGTGCTCCTACAACTGAAATACAGGTACGACTTGGAGGTGGACAACAGCAAGAGGTCAGCTCTAAGGAAGATCATGGAGAGAGACGACACGGCAGTCAAGACCCTGGTGCTTTGTGTATGTGGTGTTGTCACCAAAGGCCATAATCCAACAAGGCAGAGCTGGAGTGAGACCAAGAACAAAACCCCACCCGAGAGCGCCGCAGGGTCTAAAGCGAAGTCGTCCCTTGTAGGCTTGATCTGGCTGACGGATGGCTGGTACGCCATCAAGGCCCAGCTGGACGTACCACTGACCGCCATGCTCCA…
CUST_18576_PI417904088	C002R021	LG3BP	LGALS3BP	LGALS3BPA	Galectin-3-binding protein A (Lectin galactoside-binding soluble 3-binding protein A)	LG3BP	-	NM_001141791.1,100,100.000,60,5.18e-26	XM_021558974.1,97,94.828,58,2.31e-18	Galectin-3-binding protein (lg3bp)	gggggagaaacgaaacGTAGAGAATCCATTTGCAGAAGTGCAGTTTTCATTACATTAGCAACTACTTCCAGCCCTGTTTCTATATAAGCTGTATAATTTCATAAGGGTTGTAAAAGAACCACGACGCACACAGCAAGACACAAGAGTTTTCCAAGCTGGCTGGTGAAAATGCAGAATCGTGGAATCACTCTGTGGCTGCTGTTGCTTCTCCATGTCCCTGGACTAGACTCTGCAACATGGAATCTATTCAGTAAGTCCTCGACAGAGCCCACACAGGAAGGCGCGGTGAGGCTGGTGGGGGGTAAGCATGACTCAGAGGGTCGAGTGGAGGTGTACCACGAGGGGAAATGGGGGACCGTCTGTGACGATGGCTGGGACCTGGCCGAGGCTCAGGTGGTG…
CUST_6870_PI417904088	C035R055	MAF1	MAF1	-	Repressor of RNA polymerase III transcription MAF1 homolog	MAF1	LOC106578620	XM_014157631.1,100,100.000,60,2.54e-24	XM_021620663.1,100,96.667,60,3.84e-21	repressor of RNA polymerase III transcription MAF1 homolog (LOC106578620), transcript variant X1	aatgcaataaagtgtgttttctgtaattccatgtccaattttttcacaataaatgagaacaagtcgattttcgattttcaaattcagaaaccaaaaacgaaaataagtcaatttattacgttctatgttgtcttttgaatcaaataactactgaaCGGACGATAGACAGACCGGGTCGAGTAGTGGATTTATTCGGTTTACATCGTTACTGTTGTGTTTTACTTTCAAGTAATCGGTCTGGCTAACGACAAATAGCACAGGGACAATTCGAAATAGACAGAAGTGCAAAATCGGTTAGAAAAGGCGACTTGATCGGACAGAAACCGTAACGTTACTAACGTTAGCTAGCTAATCTCTGTCAAATTATATTGGTCAAAAGGGATGCCGCTGAAATCCAAA…
CUST_36062_PI417904088	C142R095	ENTPD2	ENTPD2	CD39L1	Ectonucleoside triphosphate diphosphohydrolase 2 (NTPDase 2) (EC 3.6.1.-) (CD39 antigen-like 1) (Ecto-ATP diphosphohydrolase 2) (Ecto-ATPDase 2) (Ecto-ATPase 2)	ENP2	-	NM_001141635.1,97,93.103,58,3.14e-18=XM_014132771.1,97,100.000,58,3.29e-23	XM_021602504.1,100,100.000,60,1.77e-24	Ectonucleoside triphosphate diphosphohydrolase 2 (enp2)	ggtccggaattcccgggtcacccacgcgtccgattccatctgcaagaagaaaatacagTTTCAACACATGGCCAAGCAACGCCGTTATATTTTCGCCCCTGTTGCGCTTGTACTGTTTGGAATAGTAGCCATTTTGCTTCTAACTATTCCCACCGAGGACTTGGCCGAACCTCCGGAATGTATGTATGGGATAGTCTTGGACGCAGGTTCCTCCCACACAGCTATGTACATCTACAAGTGGCCAGCAGACAAGCAGAACGGCACAGGTGTGGTCACTCAGCACAGTGAATGCCATCCAAAGGGTGGAGGAATCTCTAGCTATGTGGGACAGCAGGGAGCAGCAGGGAGAAGCCTCCAAGTTTGCCTGGACCAAGCCATGCAGGATATCCCCAGAGCCAG…
CUST_4041_PI417904088	C110R009	ARHGAP27	-	-	-	LOC106610657	-	XM_014210125.1,100,100.000,60,2.54e-24	XR_002470403.1,100,98.333,60,8.25e-23	rho GTPase-activating protein 27-like (LOC106610657), transcript variant X4	GGGGGACACACACACAGCCCCGTGGTAGACAACTAGGCGTTTATAACCGACACTACAGGAGCTCAAAACATACTTGGACAAGTGAACGGTAATGTGATGGAAAATAGATGCTGAAAGAGAAAGATTTACCAGGTGTAATATGATGGGAATTAATGCAAATGGTAGATTTATTAAACTCACTCTAACGTCTGGGATCCACTGAACATTCAGAGAGTAGAGGACAGAGTTGGTACAAGTCTTCTGGCTGTATGCCCACCTCCAGAGGCTCCAGCCAGCATAGCGGCTAACTAGGCCTAACAACCGTAACTGTATGCCTAACTACAGTAACATGGCGATGGTGCAGGTGGAGTTTGAGTATGAGTACACAGCCAATATCACCATGCACATGGTTTTCCAGAA…
CUST_27577_PI417904088	C247R168	TUBA1A	-	-	Tubulin alpha chain (Alpha T6) [Cleaved into: Detyrosinated tubulin alpha chain]	LOC106572601	-	XM_014146933.1,100,98.361,61,1.18e-22	XM_021616715.1,100,93.443,61,2.99e-17	tubulin alpha chain (LOC106572601)	aggtatcataataagatcatgcaacagtaacagtgtttgaaatggcttgcctgcaggggcatttcaatactcttctccctCCTCCTCTCCCTCCCCCTCAATGGAGTCAACCCCTACCTCTTCATAATCCTTCTCCAGGGCTGCCATGTCCTCTCTGGCCTCAGAGAACTCTCCCTCCTCCATACCCTCACCCACATACCAGTGCACAAAGGCACGTTTGGCGTACATCAGGTCAAACTTATGGTCAAGCCGAGCCCAGGCCTCTGCCACAGCAGTGGTGTTGCTCAGCATGCACACAGCCCTCTGGACTTTGGCCAGGTCTCCACCAGGAACCACAGTGGGAGGCTGGTAGTTGATGCCAACCTTGAAACCAGTTGGACACCAGTCAACAAACTGAAT…
CUST_14648_PI417904088	C087R135	CLEC4	CLEC4M	CD209L1	C-type lectin domain family 4 member M (CD209 antigen-like protein 1) (CD antigen CD299)	LOC100136448	-	NM_001123581.1,100,100.000,60,5.18e-26	XM_021571971.1,100,96.667,60,3.84e-21	C type lectin receptor C (LOC100136448)	GGGGTAGAATCACAATAGTCTAGCTCTAGCTGCTGAATCATTTTCTTATTGACGAGGATCACGGTGCGAGAGGCGAGATGGTTGATATGGGATCAACAGCATGCGATGGGATGTATTCTAAACTTATCGACAAAGATAGTCAATATTTGGACGATTCAGAACTGCGCGGTCATGAAGTGCACGCGGTGTCTGTTCCCTCACTGAGAGCAGGCTCCAGACAGAGTGGCCAAGGGCCCTACAGGTTAGCCACGGGCTGCCTGGCCACACTCTGCGCTGTCTTGCTGCTGTCAGTCATCGCTGTGAGCGCCCACTATAAGAACCTTAATCAGAGCTTGCGCAATGAGCATCTGGCTCCTCTGCCTCAGAATGAGTCTGGTGGTCAAATCCAGATGCAGAGGC…
CUST_38889_PI417904088	C118R134	KDELC1	KDELC1	POGLUT2	Protein O-glucosyltransferase 2 (EC 2.4.1.-) (KDEL motif-containing protein 1) (Protein O-xylosyltransferase POGLUT2) (EC 2.4.2.26)	KDELC1	KDELC1	XM_014163995.1,100,100.000,60,2.54e-24	XM_021578998.1,100,100.000,60,1.77e-24	KDEL [Lys-Asp-Glu-Leu] containing 1 (kdelc1)	GATTTTGTGTCCATGTATGTTTTATTATAAACTTTACCGATAAAAAATGTGACACAGCAAACTAATAGAAATGCGCCGTGTTGTGTATATTTTCACATCATCTCCCGGGGAGAACACATTCGAGGTGAAGATCGTGTCCCCAGTGGAACAGTTCACTAGAATCTGGGTGCAGGTTCTAGATCGCAGAGATGGTTCCTTTCTGGTGCGGTACAGGATGTATGCCAGCTACACAGACCTACACGTCCACATACTGCTCAACGACAAGCATGTCGCGAAGTCCCCATTCATTCTGAAAGGTCCAGTGTACCATGATGGTTGTGACTGTCCTCAGCCCAGTGGTTCTGTGTGGAAGAAGGACATGCAGTGCCCTGTGTCCTTCCCTCAGATAGAGCAGGACCT…
CUST_32711_PI417904088	C131R009	SCIN	SCIN	-	Adseverin (Scinderin) (SC)	LOC106588714	-	XM_014177991.1,100,100.000,60,2.54e-24	XM_021572361.1,100,96.667,60,3.84e-21	adseverin-like (LOC106588714)	AGAGAACAGAGCAGCAGTCTGTGCCTCGCTCTCACCCCATACTCTTCTCACCACACCAGGGATCCACGTCCAGCCGTCGCCCTTCTGCTACCAGACAACCAGAGGAACCATGGTGCTCTACCACAGGGAGTTTGACAAGGCAGGCAGGGCAGCCGGTCTCCAGATATGGAGGATAGAGAAGATTGACCTGGTCCCTGTGCCTGAGAACCTGCACGGGAACTTCTATGTTGGGGACGCGTACGTGGTCCTCCACACCGTCAAACAGCGGGATAGCTGCTTCTATGACCTGCACTACTGGCTGGGTAAGGAGTGCAGCCAGGATGAGAGCACGGCGGCGGCCATATTTACTGTTCAGCTGGATGATTTCCTAGGAGGGAAGCCTGTCCAGTACAGAGAACT…
CUST_7283_PI417904088	C165R048	SLAMF8	SLAMF8	BLAME	SLAM family member 8 (B-lymphocyte activator macrophage expressed) (BCM-like membrane protein) (CD antigen CD353)	LOC106577850	SLAF8	XM_014156243.1,100,100.000,60,2.54e-24	XM_021614817.1,100,98.333,60,8.25e-23	SLAM family member 8-like (LOC106577850)	ctagaacagcagcgctcatcaaaggaaatctcttctctctcttctctactcttctcagtgcgtgttttggTGAGTCTAGCTAGCTACGAGTCAGTCACAGAGAGATAGGGAGGACGTAAAGACAGATGAAACAGACATACAACACCTAACAGAGATGTCTGGTGGTCCCCTCTCCTCCTTCTCCAAACAGGGAATACTCCTACTCTCTATCCTCCACTATGGTGTGGGTATTTCTCTGTTCAACAAAGCAGTGGGGGACTCTGTGGAGCTGCCCTCAGGCTTAGAAAGGGAATGTATCAAGTCAATGGAGTGGAAGTATAAAGAAATGGTCATTGCAGAATTTGATGGGAACGTTTCCTTACCAAAATCACAGTTTGAGGGGAGACTGGAGATGAACGA…
CUST_13286_PI417904088	C157R128	MFGE8	-	-	-	-	-	-	-	0	gagttagcaagttcccgacgctgccgaatgtctttctcaggtcaaggcagatccattctagcctgatcccagatctgtttgtgctgtcttgctaaacacaaccataagagttgtcaagacagcacaactgatctgggacaaggtagatctattcattttgtatgtgctactgatgtcgttataacactccatgatacacagctccactcaataccactcagccatgttttaATTTTTTAATTTTTTTTATGATATGTTTTTTTTTTGTATTATATATTTTTTAAGGCACTTTCAGAGTCAGTTTGATTATTCTTTGCTGAGGTGTGGAAAATTGTGAAACCCAAAGTTTTCTACATTGAAGAAATACAGTATACATATTGACCCTACATGTAGATTGAG…
CUST_13553_PI417904088	C211R020	SCARB2	COTG	-	Spore coat protein G	LOC106568513	-	XR_001320313.1,100,100.000,60,2.54e-24	XM_021622584.1,100,98.333,60,8.25e-23	lysosome membrane protein 2-like (LOC106568513), transcript variant X3	ACAAAATGTTGAATAACAGGTATCAAACAGTTTATATTGTATAGAATGTTTGAAACAGCTGGTCAAATTGGCCATGTACTGTATGTCAACACTTTGGGAAGATTAGCCTCACCTTGTGGGTTAACAAGGACTTTGGGAAGATTAGCCCCACCTTGTGGGTTAACAGGGACTTCGGGAAGATTAGCCCCACCTTGTGAGTTAACAGGGACTTCGGGAAGATTAGCCCCACCTTGTGGGTTAACAGGGACTTTGGGAAGATTAGCCCCACCTTGTGGGTTAACAAGGACTTCGGGAAGATTAGCCCCACCTTGTGGGTTAACAAGGACTTTGGGAAGATTAGCCTCACCTTGTGGGTTAACAAGGACTTTGGGAAGATTAGCCCCACCTTGTGGGTTAACA…
CUST_7472_PI417904088	C181R153	ST8SIA1	-	-	-	LOC106609665	-	XM_014208635.1,100,100.000,60,2.54e-24	-	alpha-N-acetylneuraminide alpha-2,8-sialyltransferase-like (LOC106609665)	CTAGGGTAAGGCTTACTAGATAGTTATTTCACATGTTATCCAAATAAAGTGTTCTCACCGTCTGGTTCCTCTGCCCAGTATTGTGAATGAGAAATATTTCACTGTGTCATTTGCAGTAAGCATGACTGTGACTCTGTATGTGTTTTGGGGTTCTGACTTTCAAACTCATTCTGTCCATTATTTTGTGAAGCGCCATATTGGGTTGATTATGCCCCAAAATAAATAGCGTTTATTGTACCTCAATATCGGTTTTGCTGGCAATCCCTTTTATCCTTAGTATGGGTACCAGTCATTTGCCAAAGGACACAAGTGCCAAGGAGTGGAATGTTAACTAACAATACTGGTACTCAATCTATATTAGCCTAATCCTGGGGTTGAATTGTGACGTAATGCAAACAC…
CUST_36799_PI417904088	C184R095	GRN	GRN	-	Progranulin (PGRN) (Acrogranin) (Epithelin/granulin precursor) (Glycoprotein of 88 Kda) (GP88) (Glycoprotein 88) (PC cell-derived growth factor) (PCDGF) (Proepithelin) (PEPI) [Cleaved into: Paragranulin; Granulin-1; Granulin-2; Granulin-3; Granulin-4; Granulin-5; Granulin-6; Granulin-7]	GRN	LOC106601556	XM_014193860.1,100,98.333,60,1.18e-22	XM_021625509.1,100,100.000,60,1.77e-24	granulins-like (LOC106601556), transcript variant X2	GGCTGCTGCCCACTGCCACAGGCAGTGTGCTGTGCTGATGGAGAGCACTGTTGTCCCAAAGACTACATATGTGATATGAGCAAGACTTCCTGCTCTAAGGGTGGGGTGGTGATCCCATGGTACAACAAGCTGGCAGCTGAGCCAGATGACAGTGCCCTCACTGCCCCCCTCTCTGTGAAGTGTGACACCCAGAACAGATGCCCTGAAGGCTCCAGCTGCTGCCAATTTTCCACAGGACAGTGGGGCTGCTGCCCCCTGCGCAAGGCTGTGTGCTGTGCAGATGAGGAGCACTGCTGTCCACAGGGCTACAGCTGTAACATGGGCTCAGGGACTTGCCAGAAGCTAATGTTTCTTCAGTTCCAGACGGTACCCCTAACTTGGGTGTCTGCGCCTGAGCCC…
CUST_25171_PI417904088	C178R012	ECM1	ECM1	-	Extracellular matrix protein 1 (Secretory component p85)	ECM1	-	NM_001173661.1,100,100.000,60,5.18e-26=XM_014151628.1,100,100.000,60,2.54e-24	-	Extracellular matrix protein 1 (ecm1)	gacaactctcattctcttatttcataccacttccagaaataCTTGATTTGACGCTCAAGGGTCGTTTCCTGAACTTGACGTGGCTTTGGAACGACTTTGCGAAACACAGGGAAAGAGAGTGGGGTGGTGAAAAGGGGCGAAACAGAGAGAGTGGAAACAGTCCTGTGAAAGAGGACAAGGATATCAGACACCTCCCGTGTCAGTCCTCGAAATGGGTTGGTCTTGGGCTCGGGCTCTAGCCTGCTGGTGTGCATTAGTGCTGGTGTCCACGGCATCTGAAGATAAGCCTGACATGTTACAGCGAGAGGCCTCCTTTGACCTAGAGGAGCTCCTGCAAGGGGCGAGTCAGCTGGAGCCTGATATGACCCAGAGGGAGGTGGAGTTTGGGGGACTCTGGGA…
CUST_40180_PI417904088	C259R094	TER	MECR	-	Enoyl-[acyl-carrier-protein] reductase, mitochondrial (EC 1.3.1.104) (2-enoyl thioester reductase)	LOC110522173	-	-	XM_021600334.1,100,100.000,60,1.77e-24	enoyl-[acyl-carrier-protein] reductase, mitochondrial-like (LOC110522173)	GCTTTCGAGCGGCCGCCCGGGCAGGTACATGTTTCCTTTGATGCGCCTGTATTGTGGCCTGGAGGGCTTGGCTGTAGTGGTGGAAGGGAACTTGGACACAATGAGGTGGCTGGAGCTGGCCAGACTTCACAAGATCACACACAGAGGTCACCATGGTCTGTAGCTGCGTCACATCTGCTTTACTATTGTTTCTTTTCCACTGCGTCATCCAGGATCCTTGTAATGTTATATTCTTAAAAATGAGAGATTTAGCTGGAATCTGGAGAGGCTTTTGGCCATCCCACCATATGTCACTAAAGACCTCGGCCGCGACCACGCTAAGC
CUST_37284_PI417904088	C163R118	MRC1	MRC1	CLEC13D CLEC13DL MRC1L1	Macrophage mannose receptor 1 (MMR) (C-type lectin domain family 13 member D) (C-type lectin domain family 13 member D-like) (Human mannose receptor) (hMR) (Macrophage mannose receptor 1-like protein 1) (CD antigen CD206)	-	-	-	-	0	ACGGTCGCTTCACCCTCTTCAAAGCAGAAAGTGGCATTAGACAGGACCTGGCACGCTGGGTGTCAGGTGGACGTCTCTACTACACCAACAACAGGAAGTGTGCTGGGGTTTCTGGGAAGACAGAGGGTAGTACGCTGGTGTATTCTGACTGTGATGAGAAGAGCCTCCTCCAGCAGTGGGAGTGCAGTAATAACACACTGCTCACACTGAAAGGACAGACTCTGTACCTGCACATCAACGACAACAATGATCTGGTGCTGTCCAGAGACACGGGGCCTCGGAGTCGCTGGACCATCTCTGGAACAACGGACGGCCCCTGCTCGAGGACCCACAGAGAACTCTTTACCATCGAAGGAAACGCATTTGGGCGTCCCTGTCAGTTTCCTTTCCTGTACAAAG…
CUST_11006_PI417904088	C100R088	SCIN	SCIN	KIAA1905	Adseverin (Scinderin)	LOC106588714	-	XM_014177991.1,100,98.333,60,1.18e-22	XM_021572361.1,100,96.667,60,3.84e-21	adseverin-like (LOC106588714)	GCATTTTCTATCAGAGTTTTTAATGACAAAAGCATTCAATCTTCCATACTCGCCAACACACAAATTACAAACTTATTATTTTTGTTTTTACAGAGCAAATAGCAATATTTATTTCCAGACGTAGTCCAAATGTAAAGATCCGCATTCAAATTAACATCATATATCATACTTTTTGGTCTTTTGTCTTTGGAACAAAACAACAAAGATGTCCAAGCAGTACACGTCATCTGGGGTTAACACTAGTCCCTGAAGGGATAGCTAACCCTCCTTTCACACTAGTATTTTGTAAACCCTCTACTGAATACAGAGTGAATGTTATAACTGTTATAACTGTCTAAACTGTGTTATAATGGTGTTATAACTTTTGGGATTCATTGATGCTAAATCTGCAGTGTCTTC…
CUST_29403_PI417904088	C152R158	CLCN2	CLCN2	-	Chloride channel protein 2 (ClC-2)	-	-	-	-	0	GAAGGTAATATTTTAATTAAATGCATGGAGTAATTTGTGTGGAACCGCAAAAAACTAAATAAAATCGTCATGCACAACTACAAACTCTCATAGGTTACATTTCTCAGCAATCAAAATAGCAAAAAACATTCCTGCAAATAAAACAACATTTAAAAAAAAAAACAGATTTGATAAAATTGTCTTGCTTTACTTTGCTAGAAGGCACCAAGAGATTGGATCTGTGACACTGCCCAAACAACCACAGGGTACGGTGAAATGAAATACAATTTCTGCAAACACAGTATAGCATGGGACTACAGATGGATTACAGATGTAATATGAACAGGTGGTAGAGAGATGGGATATGGAGTCCAGGAGAGGAGGAAGTTATGGTGGATATTCTGCCCTTCAACTCCAGCC…
8_3_22_5	C044R145	FPR1	FPR1	-	fMet-Leu-Phe receptor (fMLP receptor) (N-formyl peptide receptor) (FPR) (N-formylpeptide chemoattractant receptor) (Fragment)	LOC106570012	-	XM_014141870.1,100,100.000,60,2.54e-24	XM_021562007.1,100,98.333,60,8.25e-23	fMet-Leu-Phe receptor-like (LOC106570012)	cgctgatgcacacagagaggacagagaagacagtgcggattgtagggacacagagacacaactatctgcacagacacacaGCATAGAACTATGCACCTCCACACTCTGTTCAACCATTGAAGCTGAAGTACTGGTCAGCTACTACTGGAGCATCGCAACTCATAGAATGACATCCAACGCCACGCTTCCATTCGTCCTCCTTGTCTCAGCCGGCCGAGATGACAAAGCCACGGTGGTGGACATTGACGCCATCATGGACAACTTCATCATTGTCCTCTACACGCTGACCATTGTCCTGGGCACCACGGGCAACTCTGTGGTCATCTGGGTGGCGGGCTTCAAGCTCAAGCCCACCGTCACCAACGTGTGGCTGGTCAACCTGGCCGTGGCCGACCTCAT…
CUST_20381_PI417904088	C141R015	IFIH1	IFIH1	MDA5 RH116	Interferon-induced helicase C domain-containing protein 1 (EC 3.6.4.13) (Clinically amyopathic dermatomyositis autoantigen 140 kDa) (CADM-140 autoantigen) (Helicase with 2 CARD domains) (Helicard) (Interferon-induced with helicase C domain protein 1) (Melanoma differentiation-associated protein 5) (MDA-5) (Murabutide down-regulated protein) (RIG-I-like receptor 2) (RLR-2) (RNA helicase-DEAD box p…	IFIH1	-	XM_014164134.1,100,100.000,60,2.54e-24	NM_001195179.1,100,98.333,60,7.21e-25=XM_021578585.1,100,98.333,60,8.25e-23	interferon induced with helicase C domain 1 (ifih1), transcript variant X2	gcttccccatgccaaaccccggatttatttatatatattagccaccaaacctttgtgatgtatttttcctgccaagatcctTTTGATGGGGcttcccctTAAATTcctTTAAAAAccccaTTTATATGTATTTctaATGTGcatTAGTTTTACTGACcctaGTAGcaccgATtccgtATAGGCAtTcctcccctaGTGGAATGAcaaGTcaaCTTCttcgcccacTCTCTGGATGCcaaATAATTAACATAACGcagAAAAACTGAAACTtAAGCACCAAAAAAATTAAAATATTActcattccaaTTAAAGTTGCACTTGGCTTCCGTTATTAAACTCCAGGATGcaaCCGTAAGGAAATGCTTGGAAATGCTTTCTCAGTCACAGGGATGCCTCCTC…
CUST_14404_PI417904088	C258R037	IRF7	IRF7	-	Interferon regulatory factor 7 (IRF-7)	IRF7	IRF3	NM_001136548.1,95,100.000,57,2.41e-24	XM_021600509.1,95,98.246,57,3.84e-21	interferon regulatory factor 7 (irf7)	AAGGAAACAAGGCAAAGTTTATTGATCTTGTTTTGCAATACTATACAATTGTGCTTTTCAATGCCAGTGTGAAGTTTACTCACTTTCAGTACAATAAAACAGATTTTTCAATACAAAAGAGAACAGACTGAAGGGTTGAGTGACCTAGACAGGTTTAAAGTGTGGCCCATAGGGACAGAAGGGAATTCAGTATAAATACCACTAAATGAGACATTAACACATTAAGCACGCAGCGATAGTGATTTGATGTATATTTAAAAAGACACACACACACAGTTAACCTGTCAAGAGAAGGATGGCCTATACTACTGCATGACACATTGACAGAAACGATACAAATCAGAATAATCTAACAGGGCTCTCCAACTCTGTTCCTGGAGAGCTACCATCCTGTAGGTT…
CUST_75_PI417904088	C043R166	CKB	TCK1	-	Creatine kinase, testis isozyme (EC 2.7.3.2)	CKB	KCRT	XM_014190721.1,100,100.000,60,2.54e-24	NM_001124715.1,100,95.000,60,1.56e-21	creatine kinase, brain (ckb), transcript variant X4	cgctcatacccttttgttctgcacagtgaccttgttgatgcgttatataactctatacgagtgtaatcaataggaagaagGATGTGTGTATTCCATTGGCCTGCATCCATACCAAATGCCCAAAGCACAATGGTTCAATGATTAGTTTCAGATAACCTTTCAAATTCTGCTGGGAATAATGCTTGTTGGTCTAGCATACCATAAGAATGTATCAATACGGAAACCATCATAGATTGTCACTGCAATAAGTGACAATCTGGTGACTCCATATGAACTAAAATAGTATAGCCAACCCTTTTTGAGGGGAACTGAGACACTAAGTAGATAGTCCAAATGCATTTTTAAGCATAGCAGGTGGCTTACCCTGTAGAATGTGTTTGTTATTGTTCAGCAATGATA…
CUST_6895_PI417904088	C254R010	TRIM35	MEFV	MEF TRIM20	Pyrin (Marenostrin)	LOC106608979	-	XM_014207267.1,100,100.000,60,2.54e-24	XM_021577768.1,100,98.333,60,8.25e-23	E3 ubiquitin-protein ligase TRIM39-like (LOC106608979)	CAGCTTTTCCTTTTTTATTAATTTGTAAAAGTTTCAAAAAATATAATTACACTTTGACATTATGCGGTATTGAGTGTAGGCAAGTGACAAAGCATTTCAATTTAATCAATTTTAAATCCGGGCTGTAACACAACAAAATGTGGAAATAGTGTGAATTTTCTGAAGGCACTGTATACAAAACTATTAATTCAAATATTTATATGTGTAATAAAGTACAACATTTTGTATCTGACCCTAACTCAACCCTAAACCTAGCTGTAGCCCTAATCCTAGCCTGAAACAAGTCTTTCACCTTCAAGGCCAAACAATGAGTGATGAGCCTATTTCTGTGATGACCAGGGGATCTGAGTTCTTCTTCCCATTCAAAAAATGTGGGCTGAGATATGGATACATTTCCCC…
CUST_8490_PI417904088	C040R031	CRYL1	CRYL1	-	Lambda-crystallin homolog (EC 1.1.1.45) (L-gulonate 3-dehydrogenase) (Gul3DH)	CRYL1	-	NM_001140447.1,100,100.000,60,5.18e-26=XM_014173969.1,100,100.000,60,2.54e-24	XM_021597698.1,100,100.000,60,1.77e-24	crystallin lambda 1 (cryl1)	ttgggttgcaggatttgcatgcagagtattcttggaagacagtgacaggttttaatgttgcaataacttactgctaatcaAAAGTGCAAAATGAGTTCCTCTGAAGGGAAGACCATTACCGTTATTGGCAGACACCATTTCTGGACAATCCTGAAGGATGTTGAGGGCACAGAAAATGTCTACTCTGTCACTGTTGAACCTTGCCACCCTTTTTTGTGGAATTTGAGCCAGAAAAGTCTTGTCATACAACACTTACATTTTAACTTCATTATGGTTTATGATTAAATTAACATGTGTTCATCTTTGGACTGACCCCCAACTCGAGGATTACTCCTATTATATGCTATATATACTAATATATATCATGTTATAATAACTGAGTCATACATTTGCAATTTA…
CUST_22496_PI417904088	C143R043	RXRG	RXRG	RXRGA-nr2b1 nr2b3a rxr rxra rxrg	Retinoic acid receptor RXR-gamma-A (Nuclear receptor subfamily 2 group B member 3-A) (Retinoic acid receptor RXR-alpha) (Retinoid X receptor alpha) (Retinoid X receptor gamma-A)	LOC106599103	-	XM_014190176.1,100,100.000,60,2.54e-24	XM_021589727.1,100,100.000,60,1.77e-24	retinoic acid receptor RXR-gamma-A-like (LOC106599103), transcript variant X8	ATGTTAAAAGTTGTCTTTATTTGCACAGATATTCTATTCTGGTGACATAGTATTTCATACCGTTCATCATTGAATAAAATAAGACTTCATGTTGCATTCAGTTGTTGCTAGATCTGATAATTAATACTCTTCTTTTTACAAAAACAAATCATCTTTAAAATTCACCTTTGACAGTGTTGCATTTCTTAAAATACCAATAGAAACTTTTTATTTTCACATTATTAATTGTGCTCGGTACAAAATATGCAAGTGAAGAACTCTCAAGTTTGACTTCATAGCAGTTGTACACCGGGGTAGGGGGTATTTACAATGGGTAAGACTTGTGTCATGTGATCTGGTGCGGCGCTTCGAGCATTTCCATGAGGAAAGTATCTATGGGCGTATCTCCTATCAGCTTGA…
CUST_2890_PI417904088	C052R108	MLCK	MYLK	-	Myosin light chain kinase, smooth muscle (MLCK) (smMLCK) (EC 2.7.11.18) (Telokin) [Cleaved into: Myosin light chain kinase, smooth muscle, deglutamylated form] (Fragment)	LOC106601033	-	XM_014192901.1,100,98.333,60,1.18e-22	XM_021624859.1,100,98.333,60,8.25e-23	complement C1q-like protein 2 (LOC106601033)	ggggacaaaactatgctgCAGGAAAGGTTTCAGAAGGCTTTGAGAACAAAGGGTATTGCAGTCTTTTTGCTGGCACTATGCTGCTGTCTGTCTGGGACACAGGGTCAGGGAGACCACGAGGACCAGAAAACATGCTGCCCATCTGACACTTGCTCTCTGATGAAAGAACTGACATCTATAGGAGAGAAACTAGGAGCCATGGGGGAGAAACTGGGAACTATGGGGGATAACCTGAGACTCATGGAGACCCGGTTACAAACCAGTGAGAATGAAGTGGAGGAGCTGAAGAGACTAACTGGAGGCCGGCCTCAGGTGGCCTTCTCCGCAGCTCTCTGGGACACAGGCGATGCCGCTGGGAACACTGGACCTTTCACCACTTCCATTCCCCTGCAGTACAAG…
10_4_5_21	C095R002	GRN	-	-	Granulin-3	LOC106588950	-	XM_014178533.1,100,100.000,60,2.54e-24	XM_021572666.1,100,95.000,60,1.79e-19	granulins-like (LOC106588950), transcript variant X2	tgggggaatgtgtacagagcagcgtttcggttaaggagtcacCCCATTGTGCTGTGTGTAACCCCATGACAGGAAGTTTTAAATCCCTGAGCTGTGACTAACTACAGGATGTGGAACATAGCTGCATTGGTGTTAGTGGTGGCAGGGTCTGCCTCTTGCTACATCACCTGCCCTGATGGGAAGGTCTGCTCTGATCAATCAACCTGCTGTTTGACTAAAGAAGGATACGCCTGCTGTCCAGTTACCCATCAGGTTCCGTGGACAGCACTAGTTCAGGCCTCTGACAGCACCCCACAGGCTGGAGTCATTCGCTGTGACACAAAATTCTACCGCCCTTCTGGAACCAGCTGCTGCAAGGGACCGACTGGCAAATGGGGCTGCTGCCCATTCCCACTGGGC…
CUST_14754_PI417904088	C165R129	EPDR1	METTL12	CSKMT	Citrate synthase-lysine N-methyltransferase CSKMT, mitochondrial (CS-KMT) (EC 2.1.1.-) (Methyltransferase-like protein 12, mitochondrial)	EPD	-	XM_014155652.1,100,100.000,60,2.54e-24	XM_021615294.1,95,98.246,57,3.84e-21	ependymin-like (LOC106577537)	gggggaCAGCAGTCCGTCTGTTTGTTGGCGTGAGTGTGTGTGACATTTGGAAGCATGAGGACCTTCGTGTTGTTGATGTGCCTTGCAGTGGGCTGCCTGGCTCAGGCACCTCATCCGTGCAGGTCTCCCCCTCTTCTGACTGGAGCCATGTCAGTGGCAAATGAGAAGGTTAATGCATATGCAAAATACGACTATGATGCGTTAGGCGAGCGTATCCGCTTCAAGGAGATGGGATCTTATGAGAACAAGACATTCGGCCTGGATGCCCTTCTGCTCTTCAGAGAGGGCGTCATGTATACGATTAACCACAAGAACCGCACATGTAAGAAGGAGAGGCTGAAGAAGGAGGACTTCCACCCCATGGAGATCCCTGCAGATGCTACTCTGCTGGGGCAGGTG…
9_2_17_2	C148R014	TSN9	TSPAN9	-	Tetraspanin-9 (Tspan-9)	TSN9	TSPAN-9, TSPAN9	NM_001141644.1,100,100.000,60,5.18e-26=XM_014153335.1,100,100.000,60,2.54e-24	NM_001165078.1,100,100.000,60,1.55e-26=XM_021577160.1,100,100.000,60,1.77e-24	Tetraspanin-9 (tsn9)	tctttttttttttttttttttttttttgacagaataagcttaatttttattgaacacatctcagtaactggttttacaatAATGCATCATTACAATATAACTGTAATCCATTTAAGGATTTCTAAGGCATGAAACCAAACCTCTTTCCTTCTACTCTTTTTTTTGTGTTCAAGCCATTCATTCTATTCTGGATGACTGAGGGGTGTCCATACACACAATCCAACCTCCCTTCCTCACCCACCCTTAGTCCCAACATAACTGAACTAGGGCCGGGATTCAATCCGACTGCGGGTTGTCGACAATTCAGCTTTTAAAGGGAATTTCCGATTGAGCTATATGCAGCATTTGGGTCCTTCCACAAAATGCTAACATTTTGGGCAGTGTAAATTGGTCAAAATA…
CUST_21230_PI417904088	C007R018	ITGA1	-	-	-	LOC106561820	-	XM_014126086.1,100,100.000,60,2.54e-24	-	integrin alpha-1-like (LOC106561820), transcript variant X2	AAAAAACAAGGTTTTATTTTTGTTGTTGTTGCATAAGATCCTTGACAACATGTGCAATGCTTTCTAAATGCTTTCAAATCTGTGCTAATGATAGTACATACAGTATAACAAACCAGTGCATTAAGTGGACATTTCACAGCAGTGTGTATGACAGGACCATATCAGTCAGATGCAGTCTCAGCCCCCTCCATCCCTCAGTCAAAGTGGACTGAGACGATAGATCAGTGATCCTCAATCCTGCTCCTGGAGAGTCAAAGTAACGCAGGTAGTTGTCCAACCTCAGCGCCATCACACCTGATACAACAATCTCTTGAGACAGACTGTTGACATGAAAGTTATTCAATGTCAAATCGAGAAGCTGGTCAGCAAACACACATTTGGTTCTGGGTTCAGAGTACG…
CUST_7759_PI417904088	C217R051	CRTAM	CRTAM	-	Cytotoxic and regulatory T-cell molecule (Class-I MHC-restricted T-cell-associated molecule) (CD antigen CD355)	CRTAM	-	XM_014197645.1,100,100.000,60,2.54e-24	NM_001124500.1,100,96.667,60,3.35e-23=XM_021617176.1,100,96.667,60,3.84e-21	cytotoxic and regulatory T cell molecule (crtam)	gGGGGGGATAGTCCACATCTGAATCTGACAGTCAAGATGCCACTAAAGCTGCAGCTTTGCTTCCTAGTCTTGTTTGTAAGGGGATCCGTTGCAGTGCAACATATGACCGTGATGGAGGGTGAGACTTTAACCATTAAGTGTCGCATTAGAAATGCCCACAGGAGCCACGTGGAATGGAAGAATCCTAACGGGCATGTGATGTTTTTCAATGACCATAAGGCCCTGAGGGATAAGCGCTACAAGATAATCAACTTGTCCGAGTCCGATTTTTCAGTCAGTGTGTCTGATGTCACCTTCAAAGATGGAGGCCTCTACACATGTTTACATTACACAAAAGTGCCTGTAGTGAAGTCAGTTACCGTGACAGTTTTGGGTATGCCAAAATTGGAGACAACAGAA…
CUST_21250_PI417904088	C022R045	ITGAE	-	-	-	ITGAE	-	XM_014214327.1,100,100.000,60,2.54e-24	XM_021582517.1,100,98.333,60,8.25e-23	integrin, alpha E [antigen CD103, human mucosal lymphocyte antigen 1; alpha polypeptide] (itgae)	CATTTAATCTTTGTATTTAGTTCTTTAGAGCAAACATTTTAAAACAAAAACATTGAGGCAATTTACACCAAGGTAAACAAATGTACAGTAGAAATATGAGTAATATTTTATAGTAAACCTTACCGTATAGAATACTTTAAAAACACAGACATAGTGTAAGTCAATTATCTCTATGTAGAAATATGCAATACATAACAAAATAATTAACAAATTCAAAACAATGATGTGGCTTTGTCATATTTCTAAGTTCTCATCATAATACAAACATGAGTCCATTTTAAAAAGTGTGCTATATTCTAATTGAGTCATATTTTGTATAAAACCGTACAATATAAAATATTTTAAAACAGTCATCACAGTAGGCTATAAGTCAATTATCTGAATATGTATGAATGTACA…
CUST_20073_PI417904088	C110R055	ITGAE	-	-	-	ITGAE	-	XM_014214327.1,100,100.000,60,2.54e-24	XM_021582517.1,100,98.333,60,8.25e-23	integrin, alpha E [antigen CD103, human mucosal lymphocyte antigen 1; alpha polypeptide] (itgae)	CATTTAATCTTTGTATTTAGTTCTTTAGAGCAAACATTTTAAAACAAAAACATTGAGGCAATTTACACCAAGGTAAACAAATGTACAGTAGAAATATGAGTAATATTTTATAGTAAACCTTACCGTATAGAATACTTTAAAAACACAGACATAGTGTAAGTCAATTATCTCTATGTAGAAATATGCAATACATAACAAAATAATTAACAAATTCAAAACAATGATGTGGCTTTGTCATATTTCTAAGTTCTCATCATAATACAAACATGAGTCCATTTTAAAAAGTGTGCTATATTCTAATTGAGTCATATTTTGTATAAAACCGTACAATATAAAATATTTTAAAACAGTCATCACAGTAGGCTATAAGTCAATTATCTGAATATGTATGAATGTACA…
CUST_31299_PI417904088	C037R041	GPI	GPI	-	Glucose-6-phosphate isomerase (GPI) (EC 5.3.1.9) (Autocrine motility factor) (AMF) (Neuroleukin) (NLK) (Phosphoglucose isomerase) (PGI) (Phosphohexose isomerase) (PHI)	CKM2	-	NM_001139716.1,100,100.000,60,5.18e-26=XM_014137135.1,100,98.333,60,1.18e-22	XM_021623857.1,100,96.667,60,3.84e-21	creatine kinase-2 (ckm2)	acgcagccagtcatcagcctcctcaacctgccatctattgacgatcttctggttaaagatgcCAAactcatagcggataccgtagccatacGCAGCCAGACCCAgagaagccaTAGagtccaGGAAGCAGGCGGCAAGACGTCCAAGACCACCGTTTCCCAGGCCTgcgtcCTCCTCCAtgtcctCCAGCTCCTCCAtgtccaGACCCAGCtggtatATGGCCTCATCACAGGCGTTTTCCAGCGCCAGGTTCACCATGGTGTTCTGCAGGGTGCGACCCAtgtagAACTCCAGGGAGATGTAGTACTGGTGACGATGCAGCAGGGGGAGGAGACCAGGCGGTTGGAAACTGAAACCTTCTCAATCTTCTTGTCCAGGATGTCCTTCATTGTCTTGCAG…
CUST_6673_PI417904088	C105R121	ABHD12	ABHD12	-	Lysophosphatidylserine lipase ABHD12 (EC 3.1.-.-) (2-arachidonoylglycerol hydrolase ABHD12) (Abhydrolase domain-containing protein 12) (Monoacylglycerol lipase ABHD12) (EC 3.1.1.23) (Oxidized phosphatidylserine lipase ABHD12) (EC 3.1.-.-)	ABD12	ABD12	NM_001140514.1,100,100.000,60,5.18e-26	XM_021580213.1,100,96.667,60,3.84e-21	Abhydrolase domain-containing protein 12 (abd12)	gaactttcacccatggaGCCTCTGAGGTAGACTAAAAGAACATACGTAGGGTAGAAAATAAAGTAGTTAGTCACATAGCCTAGATGTCAATCTAGAACAGAACGGCTGCATTACAGATGCAGAGGACTGGTGGCTCGGTTAGTAAACATCTCAGGATGAGGAAGAGGACCGGTGACCATGATTCCGAGGAGCAGAAGACTGCGAGAAAAAAAACTTGGGCGTCATCGAGTGCGCAGCCGAGACCTTGCCCCCGTTTGTTGTGGTGGTTCAAAAGAGGTCTCCTGGCCGTATGTGTCATTTATGTTTCTGTGCCTTTCATGATGGCACCGTTTCCTGACATCATAAAGCACCTGGTTTATTCTCACAGAGTCAGGGTCCCATTCTTCATCGACCACAGCC…
CUST_26487_PI417904088	C020R010	-	-	-	-	-	-	-	-	0	aagcaaaccagacagcaCAATTTTTCTAGTTTTATTTACGGATAGGCAGGGGCACACCAACATCTACAAACAAAGAATGTGTTTAGGGAGTATGCCAGAGGCAGTAGGATGACCAGGGATGTTCTCTTGATAAGTGGGTGAATTGGACCATTTCTGTCCTGCTAAGCATTCAAAATGTAATGAGTACTTTTGGGTGTCAGGGTAAATGTATGGAGTAAAAAGTACATTCTTTAGGAATTTAGTGAAATTGTCAAAAATATAGATACCCCAAAAAATTACTTAAGTAGTACTTTCAGGTATTTTTACACCACTGGACTTTAGACAACTGAAAAGTGGGATAGTAAAAATTGTGGATTTTAAGTAACCCTGTTTATCAAAACATTTGTGCAAGTTAAAATC…
CUST_12222_PI417904088	C023R132	RNFT2	RNFT2	TMEM118	RING finger and transmembrane domain-containing protein 2 (Transmembrane protein 118)	RNFT2	-	XM_014159994.1,100,100.000,60,2.54e-24	XM_021622137.1,100,96.667,60,3.84e-21	ring finger protein, transmembrane 2 (rnft2)	AATGTTGAACAATACTGCATAAGTCATGGTTTAATTGGAAAGTCTGATACACAATGAAAGACAACAGAACCTGTGACTTTTTCTATAAAGTTTTTGTATTTTAAATAATGTCATTAAACATAAGCTGAATCTACACTAGAAATCAACTGAAATGCATAAGTAACTAAATAAAACTAAATACATGAGCAAACAAGCAATTGTTGTACTGAGATACTATTATAGGTACCCTTTGCCAGAATACTAACCCATACCACACGGTGCTGGGTCACACTGAGATAAGTTAATATTCTATTTCTTTGCAAGACATGGCTGAAGCCAAACTTAGACAAGCAGTGTGATAGGGATAGTGACAGCGGTGTAGAGAAGGTATAGTAACTGACTTGATACATAAATGGCATA…
CUST_14474_PI417904088	C075R054	-	-	-	-	LOC106569017	-	XM_014139948.1,100,100.000,60,2.54e-24	XM_021613040.1,100,95.000,60,1.79e-19	uncharacterized LOC106569017 (LOC106569017), transcript variant X2	ttggtccacagtcaactatcgactggacagccagttatctagacaggcctacatttgagctgttgaagtgagcaaagtacAATGGAGGACAGAAGCCTTCCTCGTATTGTGGTCATTACACTGTCTGTGCTGATCTACATTTCTGCTTTGGCAATAAATGCCATGGCAGGAGCTGGAAAGGGACCATTCCATTGGAGTACAGGGAACATCTCCAGGAAGTATGAGACTGACATAACTCCGGCTGGGTGGACCTTCTCCATCTGGGGGCTTATCTACACCTGGCTGACCCTCATGATCATGTATATCATCTCCTTGATCTACAGAGGGAGCTGGACACTCTCTGTGCTACTGTACGGTTTCTACCTGTCCTGGATAGTTAACATGGCCCTCAACATGACC…
CUST_22640_PI417904088	C171R113	GADD45A	GADD45A	DDIT1 GADD45	Growth arrest and DNA damage-inducible protein GADD45 alpha (DNA damage-inducible transcript 1 protein) (DDIT-1)	LOC106568974	GA45A	XM_014139890.1,100,100.000,60,2.54e-24	-	growth arrest and DNA damage-inducible protein GADD45 alpha-like (LOC106568974), transcript variant X2	GGGGGATTTCCAACAGCGATAAACAGAGTCGCTACTGTGTTACAACTTCACCAGCACTAACAGTGACATACCAGCAAGCAATATTATTGTCTCGATTTTGATTTCATGTGCAAAATGACATTTGAGGAACTAAGTGGGGATTATTCTGCAGAAAGGATGGATACAGTGGCAAAAGCATTGGAAGAGGTTCTCTCATTGGCATTACCCCAAGGATGCATAACAGTAGGGGTCTATGAAGCAGCAAAATCATTGAATGTTGATCCAGATAATGTGGTTCTGTGCATCCTGGCTACAGATGACGAGGATGTAAAGGACGTGGCCCTTCAGATCCACTTCACCCTGATCCAGGCATTCTGCTGTGAGAATGACATCAGCATCCTGCGAGTTAACAACACCAGG…
CUST_23397_PI417904088	C026R062	TCO2	TCN2	-	Transcobalamin-2 (TC-2) (Transcobalamin II) (TC II) (TCII)	TCO2	-	NM_001140261.1,100,100.000,60,5.18e-26	-	Transcobalamin-2 (tco2)	tatttagctaacacacatacctgtataactttcactgcgtttatctacctctttattttcgctgtcacatgttcagctttTCTGGGAATAAATTTAATGAATGCAGTGAAGTGAGGTGCTAAGAACCACCAATACACTGCACAACTGCTGATGAAGAATCTAATCGAGCAAAAAAAGTCGTTGACGTTGTAGAAAAGATAGAGCATGCGCTTCTGAGACAACAGGTCACTTGACACGATCATGAGAGCGATGTCGACCTAAAATCAAGTTAATAGCGGTCTTCACGACAGGTTGGTCAAAATGTATGCCCTGTACATTGTGAGTGGACTGCTGGCACTGGTTGCAAGCGAAACCTGTGATCCTGTAGGATCGGAACATAGTGAGCTGCTCCTCTCACTC…
CUST_13942_PI417904088	C153R077	PKIG	PKIG	-	cAMP-dependent protein kinase inhibitor gamma (PKI-gamma)	LOC106572615	-	XM_014146955.1,100,100.000,60,2.54e-24	XM_021616701.1,100,100.000,60,1.77e-24	cAMP-dependent protein kinase inhibitor gamma-like (LOC106572615), transcript variant X2	GAAGATACATAAACATTTTATTACAGAAAAGAAATGACTATTACAAAAGGTATCAGAGAACCATTTGAAATAAATATGCTCCTACAATTATTATTGTAAAACAAAAAATGTAAAATAATAAACTGGGTCACATACACAAAAGAAATGGCAAACATGATTATAGATTCTGCGTAGCTCATTTGATGATAGTTCCATGTTAGGAACAACATGTAATTCTAAGAAAGGATCGTGTTCAGTACATCTGGAGAGACATAGATCCATGTTGGGTACATTCTCATAGTGATATGAGAACATTTAATTACCACCGTAGCCCAGCACCACCTCTAGGCAAAGATCAGATGTAGTCCTACTTGTCAACAGCTGTTCTGTCAACTACATTTCCCACAATGCCAATTGATA…
CUST_20655_PI417904088	C155R076	CSF1R	CSF1R1	-	Macrophage colony-stimulating factor 1 receptor 1 (CSF-1-R 1) (EC 2.7.10.1)	M-CSFR	-	XM_014199902.1,100,100.000,60,2.54e-24	NM_001124738.1,100,98.333,60,7.21e-25=XM_021559488.1,100,98.333,60,8.25e-23	macrophage colony-stimulating factor 1 receptor 1-like (LOC106604846), transcript variant X3	CTCTCTAGGAAAGAGCCCCTACCCCAGTATCCTGGTGGATATTAAATTCTACAACATGATAAAGTGTGGTTATCAGATGTCTCAACCAGACTTCGCACCTCCAGAGATGTATACAATCATGAAAATGTGCTGGAATCTGGAGCCAACAGAGCGACCGACCTTCAGCAAGGTCAGCCAGCTGATTGAGAGATTACTGGGTGAGCAGCCAGAACGTCCAGACCAGGAGCACCAGAACGTCCAGCTGCAGCAGGACATGATGGTTGAGGAGTTGGAGCTGTGTGATGATAATGATGAGCCTAAGTGTTGTGACGGCTCCTGTGACCAGTCGTGTGAGCACGAAGAGGAGGAGCAACCACTGGTGAAGACCAATAACTATCAGTTCTGCTGAAAGCATAATTC…
CUST_24397_PI417904088	C074R108	ASRGL1	ASRGL1	ALP CRASH	Isoaspartyl peptidase/L-asparaginase (EC 3.4.19.5) (EC 3.5.1.1) (Asparaginase-like protein 1) (Beta-aspartyl-peptidase) (Isoaspartyl dipeptidase) (L-asparagine amidohydrolase) [Cleaved into: Isoaspartyl peptidase/L-asparaginase alpha chain; Isoaspartyl peptidase/L-asparaginase beta chain]	LOC106612836	-	XM_014214423.1,100,100.000,60,2.54e-24	-	isoaspartyl peptidase/L-asparaginase-like (LOC106612836), transcript variant X3	gatgagagaaagtaatttatttaaaattgctttaatgaagtttgttttttcctcaggttttaATTATTACAAAAACATCCATAATCCATTAAACATTTACATAGAACATTAAACCATTTGAAAACTCTCAAACTGACCAAGCTTTTGTCAAATATATTCTGTGATAAAATGCCACAACATTTTGAAAACACAAACACATATAGATTTCTCTGGTCCTTTAAATTCTCTTGCCAACAGAATTGCAGTAAGTAGGCTCCATTTGTCAATCTGGCACTGTGTTCCGCAATAACACTTTATTTCAAATCTATGTATCCCCCCTCCCCCAACAAAATTTAGATTAAGCTGTTATTGTCTTAGTGTCTCTTTGAACTCTTCTTTTGGGTTCAAACCATACCACAG…
CUST_26468_PI417904088	C080R102	CORO1C	CORO1CA	-	Coronin-1C-A	CORO1C	-	XM_014161190.1,100,100.000,60,2.54e-24	XM_021621682.1,98,96.610,59,4.96e-20	coronin, actin binding protein, 1C (coro1c), transcript variant X3	gtccttttttagataattcagcagtcagGGATTGGTTCGAGGGGAAGAATGGCGAGCCCATCCTCATATCCCTGAAGAACGGCTACGTCCCTGGCAAGAACCGCGACCTCAAGGTGGTCAAGAAAAACATCCTGGACAACAAGCTGAGCAAGAACACGGAGAAAAGGGGCCCAGCCAACAAGTCTGCCTCTCCCACTCCATCCAGAAAAAACGAAGCTAAACTGGATGAGGTCTTGAAAGAAATCAAATCCCTCAAGGACCTGGTCAGCAGTCAGGAGAAGCGAATCATCCAACTCGAGGAGCAGATGTCCAAGATTGCCATTTAAGGACCCTCCCACCAAAATTCAGGACGATCCATTGGCTAGGAGGTGGGCGGGACCCGTCACTGCCAATCTCAAT…
CUST_12470_PI417904088	C177R069	COMTD1	COMTD1	-	Catechol O-methyltransferase domain-containing protein 1 (EC 2.1.1.-)	LOC106577198	-	XR_001322078.1,100,100.000,60,2.54e-24	XM_021613824.1,100,100.000,60,1.77e-24	catechol O-methyltransferase domain-containing protein 1-like (LOC106577198)	AGTAGACCCACATTCCTTCAATAATGTCTCTTTGGTGTTCACTCTATATAGCTGAATAGACACACTTCCAAAATGGCTCCAGATATCAAGATGTATTTCTGCTTTCAGCTTGTTCTTGCACTAACAGGCACAGGAATAGGATCTGCCCTGCCAGGTAAGAGCCACAGTGGAGGGAAGAACAACCCAGTGCTGCAGTATGTCGTGAACAACTCACTGAGAGAACATCCTGTCATGACCAAACTCAGACTGAAAACCCTTGAGGACCCATGGAGCATCATGCTGGTTGCTAGTGAACAAGCACAACTGATGGCAAATCTGGCCAAACTGATCAATGCCAGCAAAACCATTGAAATTGGGATGTACACAGGGTACAACACCCTGAACATGGCGTTGGTTGTA…
CUST_19028_PI417904088	C189R116	#N/A	-	-	-	-	-	-	-	0	0
CUST_26730_PI417904088	C176R090	SLC12A4	SLC12A4	KCC1	Solute carrier family 12 member 4 (Electroneutral potassium-chloride cotransporter 1) (Erythroid K-Cl cotransporter 1) (hKCC1)	LOC106587609	-	XM_014176169.1,100,100.000,60,2.54e-24	XM_021607735.1,93,98.214,56,1.38e-20	solute carrier family 12 member 4 (LOC106587609)	cagtttgtATGtactGTATGTTGAGGATCGGCTGGATGCTGCTACCGGTGCTGCAGTGCCCCCGGTGGTCGGGGTGGAATGTCTCCTGTCGAGGCAGTGTCGTGACCTGTGAGCCGAGTGGTTTCTGATAGGTCAGGAGTAGATAGTGATGACCTCTCGGCCTCCTCCTCTCACCAGCAGCACTCTCTCCAGACCTTCCGTCAGCACCTCCAGAAACTCCATATAGTTCTcgtctccgtctgtgttgcgtggcggccccggcatgttgagcagcaccagacgagcatcatgggacttgttgacgatcacctcgttcagcttcactgccgtgtgcatccgccgcacattggactggtccggtttgaggctcatgggttctctgaagttctctggtgcgtt…
CUST_25256_PI417904088	C028R152	SIGLEC1	MAG	-	Myelin-associated glycoprotein (1B236) (Brain neuron cytoplasmic protein 3) (Sialic acid-binding Ig-like lectin 4a) (Siglec-4a)	LOC106605608	-	XM_014201443.1,100,100.000,60,2.54e-24	-	sialoadhesin-like (LOC106605608), transcript variant X2	ttggcttgatttgaaaagcctacatgacaagtgagggagcgtcgatctatgttgaaacattttcgtaccatacacttatcTAATTGAAGACCAGACATTGTTACAAGGTCCAGCACTGAGAGGAGGTGATGTGGATTGAAAAATTACCATGGTGTTTTCTTATTCATTGCATTTGGCTTGGAGTGATGGGAGTTGATGCCTCGTCATGGACTGCTGAGGTGCCAAGCTCAGTCTCCGGCCTGCAAGGCTCATGCATTGTGATTCCCTGCTCATTCAACTACCCAGAACCAAAGATAAACCCCTCTGAATTCACTGGCATCTGGTTCAAAGACACTTATGAGGTTATCTACCACCCAGACAGCTCCAACGCGATCACAGACTACAGGGGTCGTACAGAGC…
CUST_5397_PI417904088	C082R073	CRYL1	CRYL1	-	Lambda-crystallin homolog (EC 1.1.1.45) (L-gulonate 3-dehydrogenase) (Gul3DH)	CRYL1	-	NM_001140447.1,100,100.000,60,5.18e-26=XM_014173969.1,100,100.000,60,2.54e-24	XM_021597698.1,100,100.000,60,1.77e-24	crystallin lambda 1 (cryl1)	ttgggttgcaggatttgcatgcagagtattcttggaagacagtgacaggttttaatgttgcaataacttactgctaatcaAAAGTGCAAAATGAGTTCCTCTGAAGGGAAGACCATTACCGTTATTGGCAGACACCATTTCTGGACAATCCTGAAGGATGTTGAGGGCACAGAAAATGTCTACTCTGTCACTGTTGAACCTTGCCACCCTTTTTTGTGGAATTTGAGCCAGAAAAGTCTTGTCATACAACACTTACATTTTAACTTCATTATGGTTTATGATTAAATTAACATGTGTTCATCTTTGGACTGACCCCCAACTCGAGGATTACTCCTATTATATGCTATATATACTAATATATATCATGTTATAATAACTGAGTCATACATTTGCAATTTA…
CUST_38166_PI417904088	C085R017	FUCA2	FUCA2	-	Plasma alpha-L-fucosidase (EC 3.2.1.51) (Alpha-L-fucoside fucohydrolase 2) (Alpha-L-fucosidase 2)	FUCA2	-	-	XM_021573740.1,100,98.333,60,8.25e-23	fucosidase, alpha-L- 2, plasma (fuca2)	AGCATCATGTGATATCGGTAAGCTATTTTAGATGCAAAACTCAACTGAACGCAGCTTTCGGTTACCTGACTTCGTAGGAGTTATGTCTTATTCAAAGTTAGCCCTCGTTTCTGTCGCACTTCTCCTGATGATTACTGTATGCAGTTGTAAATATGAGCCTACCTGGGAATCCATCGACTCCCGACCTTTGCCAGAGTGGTATGACCAGGCCAAGTTCGGAATATTCATTCACTGGGGAGTGTTTTCTGTTCCAAGCTTTGGTAGCGAGTGGTTCTGGTGGTTTTGGCAGAAGCAGAAGATAAAGTCCTATGTTGACTTCATGCAGAAGAACTATCCTCCAGACTTCAAGTATCAAGACTTTGCACCACAGTTTACAGCTGAGTTCTTTGATCCCAAAGA…
6_1_17_19	C058R074	CRYL1	CRYL1	-	Lambda-crystallin homolog (EC 1.1.1.45) (L-gulonate 3-dehydrogenase) (Gul3DH)	CRYL1	-	NM_001140447.1,100,100.000,60,5.18e-26=XM_014173969.1,100,100.000,60,2.54e-24	XM_021597698.1,100,100.000,60,1.77e-24	crystallin lambda 1 (cryl1)	ttgggttgcaggatttgcatgcagagtattcttggaagacagtgacaggttttaatgttgcaataacttactgctaatcaAAAGTGCAAAATGAGTTCCTCTGAAGGGAAGACCATTACCGTTATTGGCAGACACCATTTCTGGACAATCCTGAAGGATGTTGAGGGCACAGAAAATGTCTACTCTGTCACTGTTGAACCTTGCCACCCTTTTTTGTGGAATTTGAGCCAGAAAAGTCTTGTCATACAACACTTACATTTTAACTTCATTATGGTTTATGATTAAATTAACATGTGTTCATCTTTGGACTGACCCCCAACTCGAGGATTACTCCTATTATATGCTATATATACTAATATATATCATGTTATAATAACTGAGTCATACATTTGCAATTTA…
CUST_6819_PI417904088	C161R018	TSN9	TSPAN9	-	Tetraspanin-9 (Tspan-9)	TSN9	TSPAN-9, TSPAN9	NM_001141644.1,100,100.000,60,5.18e-26=XM_014153335.1,100,100.000,60,2.54e-24	NM_001165078.1,100,100.000,60,1.55e-26=XM_021577160.1,100,100.000,60,1.77e-24	Tetraspanin-9 (tsn9)	tctttttttttttttttttttttttttgacagaataagcttaatttttattgaacacatctcagtaactggttttacaatAATGCATCATTACAATATAACTGTAATCCATTTAAGGATTTCTAAGGCATGAAACCAAACCTCTTTCCTTCTACTCTTTTTTTTGTGTTCAAGCCATTCATTCTATTCTGGATGACTGAGGGGTGTCCATACACACAATCCAACCTCCCTTCCTCACCCACCCTTAGTCCCAACATAACTGAACTAGGGCCGGGATTCAATCCGACTGCGGGTTGTCGACAATTCAGCTTTTAAAGGGAATTTCCGATTGAGCTATATGCAGCATTTGGGTCCTTCCACAAAATGCTAACATTTTGGGCAGTGTAAATTGGTCAAAATA…
CUST_29394_PI417904088	C134R166	ANKRD55	ANKRD55	-	Ankyrin repeat domain-containing protein 55	ANKRD55	-	XM_014144666.1,100,98.333,60,1.18e-22	-	ankyrin repeat domain 55 (ankrd55)	ATCCCAGCTGCCTTCCCAGGGCAGTGATCCATCCCAGCTACCTTCCCAGGGCAGTGATCCATCCCAGCTGCCTTCCCAGGGCAGTGATCCATCCCAGCTGCCTTCCCAGGGCAGTGATCCATCCCAGCTACCTTCCCAGGGCAGTGATCCATCCCAGCTGCCTTCCCAGGGCAGTGATCCATCCCAGCTACCTTCCCAGGGCAGTGACCCATCCCAGCTGTCTTCCCAGGGAAGTGACCCATCCCAGCTGCCTTCCCAGGGGAGTGACCCATCCCAGCTGTCTTCCCAGGGGAGTGACCCATCCCAGATGCCTTCCCAGGGGAGTGACCCATCCCAGCTGTCTTCCCAGGGGAGTGACCCGTCCCAGAAAAAGGAGGGCAAGTTCCGCATGCTCAACCA…
CUST_22470_PI417904088	C161R164	LPL	LIPG	-	Endothelial lipase (EC 3.1.1.3) (Endothelial cell-derived lipase) (EDL)	LOC106613694	-	XM_014216225.1,100,100.000,60,2.54e-24	XM_021603652.1,100,93.651,63,2.31e-18	lipoprotein lipase-like (LOC106613694)	caaaatAGCAGTTCCAATTTATTAAAGTATGTATACGGTCACATATGTACAGGTATATACAGATATAATTTAAAAAGTTAAGACGGTAAAAAATATATTGATTAACATTTTACCATAGAATCATATGCTAACATATTTACACATGGTGCACTTAGTAAGTAACTGGTTTAGTAACCCTTTCCTCTGGTTCAGTGCAAAAGTTTATACCACCTTTTCTACAGGCTCAATAGAACAGGCAGAAATGAAATAAGTCACAATGATTACAATACCGGTCTCTAAATGTATAATATTAGTTATAAATAGCCTACTCAGTGCTGTTAAAATAGTCTGACAATCAGATATTATTAATAGCCAATTCTTAACTGTAACTATGATGCAAAGTCCACTGAGGAAGTCTGT…
CUST_20382_PI417904088	C198R086	EXOC3L2	EXOC3L2	XTP7	Exocyst complex component 3-like protein 2 (HBV X-transactivated gene 7 protein) (HBV XAg-transactivated protein 7)	LOC106612674	-	XM_014214078.1,100,100.000,60,2.54e-24	XM_021582061.1,98,100.000,59,6.38e-24	tumor necrosis factor alpha-induced protein 2-like (LOC106612674), transcript variant X2	gcacgagggGGACGACTGCGCGATGAGGGCAAGCAGATCGAaGTGCTCTTCAAAGATCTggAATCTCCCTCCTCCTGGCTGGACAGTGCTATCCCACACCTCTCTGAGATCATCCTCCTGGAAGACATCCCCTCCATCCAAATGGAGGTGGGGGTCCTGGTGAGGGAGTTCCCAGACATTCGGAAGAAACATGTGTCGGCCATCTTGAACATCCGCGGGATGACTCGGCAGACGGAGCGCCAGGAGATCCTGAATATCGTGAAGGACATTGAGAACAGTGACACACTGACGCGGATGTCCCGCGACCGTGCCCTCTTCTCCGAGGTGCCCGTCACATCCGAGGTGCACTGCCTGAACTTGGGCCTGAGCCGCATCGCCCTCACTGCCTCCTCCTGCTTC…
CUST_8601_PI417904088	C209R129	CSRP2	CSRP2	LMO5 SMLIM	Cysteine and glycine-rich protein 2 (Cysteine-rich protein 2) (CRP2) (LIM domain only protein 5) (LMO-5) (Smooth muscle cell LIM protein) (SmLIM)	CSRP2	-	NM_001141173.1,88,100.000,53,4.03e-22=XM_014153860.1,100,100.000,60,2.54e-24	XM_021576819.1,100,98.333,60,8.25e-23	cysteine and glycine-rich protein 2 (csrp2)	GGGGGGAGTAGTTTGGTGAGTCCGCAAAGGACACGACGTCGATACGCTGGGATAAAATTGAAGGATTCTCCCACAACAAATACAGCACCAACATGCCAAACTGGGGAGGAGGTAACAAGTGTGGTGCATGCCAGGGGACGGTGTACCATGCCGAGGAGGTGCAGTGTGATGGGAAGAGCTTCCACAAATGCTGCTTCCTGTGCATGGTCTGCAGAAAGGGTTTAGACAGCAACAATGTGGCCATCCATGACACTGAGATCTACTGCAAGTCCTGCTATGGGAAGAAGTACGGCCCCAAGGGCTACGGCTACGGTCAGGGAGCTGGGAGACTCAGCATGGACCGTGGAGAGAGACTGGGGATCAAACCAGAGGAGACCCAGTGTCACAGACCCACCACCA…
CUST_953_PI417904088	C089R130	SCARB1	SCARB1	-	Scavenger receptor class B member 1 (SRB1) (High density lipoprotein receptor SR-BI) (SR-BI)	LOC100534606	-	NM_001204894.1,100,98.333,60,2.41e-24=XM_014138766.1,100,100.000,60,2.54e-24	XM_021602065.1,100,96.667,60,3.84e-21	SCARB1-like protein 2 (LOC100534606)	CAGGGTAAATCATTATTTTATTATTTTATATTCATATTGCCATCACATTCTTCTGATTGATATGATAGAGGCATGTTTTCAGGAGTGATTGGGAACAGTTTTACATGTGGACCAACCCCATGGTTCTGGATCACTGTAGGCAGATTTTTTTTCAACGACGCCTTCTTCCTGTAGTATAGTAGTACAACCCCCAGTATGGTGGCCAGGCCCAGGACTATGAAACAGTACTGCATGTACACCATCACCTTGGGCAATAGCACCAGGTTAGTGTGGAACGTCGTCAGGATTTCACCATCGATATAACCATTCTCCTCAAACCACATCATGGGCATCATCACCTCTGAGATCTTCCCAGTTTCCGTGATCCCAGACACTTTCTTCATGTACAAGTTGAGCTGC…
CUST_9217_PI417904088	C248R011	ITGB5	ITGB5	-	Integrin beta-5	LOC106586391	-	XM_014173615.1,100,100.000,60,2.54e-24	XM_021597438.1,95,100.000,57,8.25e-23	integrin beta-5-like (LOC106586391), transcript variant X2	cccgatgcctgtggcaccaaaagggaatgcatcgagtgccggcttttcaactccggaagactctccgacaaccagacctgCCAGCGGCTATGCAAGGACGAGATCATCACTGTGGAAACGCTTAAAACGGAAGACCCAAACGCTGTCCTTTGCTTGTACAAGACGGAGAACGAGTGTGTGATGAAGTTCATGTACTCTGAACACGCCAACGGCATGTCAGTCCTCACCGCGCTCAAAGAGCCAGAGTGTGGCGCAGCGCCGGATGCCATGACGGTCCTCCTGGCGGTGGTGGGCAGTATCCTGCTGGTGGGCATTGTGCTGCTAGCCATCTGGAAGCTGGTCATCACCGTGCACGACCGGCGGGAGTTTGCCCGCTTCCAGAGCGCACGCTGCCGCGCA…
CUST_2250_PI417904088	C172R012	NDRG3	NDRG3	-	Protein NDRG3	NDRG3	LOC106572081	XM_014145893.1,100,100.000,60,2.54e-24	XM_021616055.1,100,95.000,60,1.79e-19	protein NDRG3-like (LOC106572081), transcript variant X8	cgtgcctctccctcgctcgctcctttagtttccctctctcacgcatgatcctcccctcatttggtgggaccagttgctgtTACCAAACATTTTAGTCGTTCCTTGTGGGCTCCGTGCTCCATTCTGTTGCTGCCCCCCTCCTGCAGCCACCTCTCCGCTCTGCTGCCAGCGTCACCACCACCGCCCCTTTTCAGACAACACAGGGACAGACCGACAGCACTCCTCTCTTCTACTGACAAAATGACAGCCGTTCTGGACCTCAACCAGATTGCCATTGCCTGTTCGACCATTGGTGTGGTGGAGCATGACATCGAGACCCCCCATGGTGTCCTGCATGTGACGATGAGGGGCACCCCCAAGGGCAACAGACCGGTCATCCTCACCTACCATGACATTGGA…
CUST_26977_PI417904088	C190R104	SCPEP1	SCPEP1	RISC SCP1	Retinoid-inducible serine carboxypeptidase (EC 3.4.16.-) (Serine carboxypeptidase 1)	LOC106606214	-	XM_014202350.1,100,100.000,60,2.54e-24	XM_021625861.1,100,98.333,60,8.25e-23	retinoid-inducible serine carboxypeptidase-like (LOC106606214)	ttgggtttgttgataacccggtaggaacaggcttcagctacacggactcagaggaggccttcgctactgacgtggctacgGTCGCCTCCGACATGCTGGTGCTGCTCAAACAGTTCTTCAACAAGGAGGAAGAATTCCAGAGCGTGCCCTTCTACATATTCTCAGAGTCCTATGGAGGGAAGATGGCTGCCGCGATCTCACTGGAACTCACTAAGGCCGTAGAAAAAGGAACCCTGAAATGTAACTTTGCTGGAGTGGCTCTGGGAGACTCTTGGATCTCTCCACTGGACTCTGTTATGACCTGGGGTCCTTATCTGTACACCACGTCCCTGCTAGATGACTACGGCCTGCGGGAGGTGAGCAGTGCAGCGGAGGCGGTGAAGCAGGCGGTGGATCAGG…
CUST_6557_PI417904088	C239R108	GYAR	YVCT	-	Probable 2-ketogluconate reductase (2KR) (EC 1.1.1.215)	GYAR	-	NM_001140007.1,100,100.000,60,5.18e-26=XM_014185299.1,100,100.000,60,2.54e-24	-	Glyoxylate reductase (gyar)	ttggcacacacagtttgaatgaggttatccatttcagagagagagttttagaactctgtctcgagttcgctacatgctctGTTATGTAGGACAGAGAGGGTTAGTGCATTAATGTTTGTCTTCCTCCCATTGGCATGTTGTACAGAGCCCTGTGAATATTTCACAGACTAATGCCTCCTTTCATCGGTGAAACGGTAGTGGATTAATCGCGCCTGGCTGTCAGACAGAAACGACATGTTCCATTTGATAAACAGATTGAAGACTCCACTGCTCTCATTTGGAGGAACGCGCACAATATGCCAACTGATCAACATGGAGAAGCCCTGCATACTGGCCACTACCTTCGGAGCGCATGGAGGCATCTACAAATGCTTTGCACCAGTTGTCGAGAAACACTTC…
CUST_36005_PI417904088	C047R032	PDZPH1	-	-	-	LOC106571915	-	XM_014145483.1,100,100.000,60,2.54e-24	-	uncharacterized LOC106571915 (LOC106571915), transcript variant X2	ATAGTCAAACTGTCATGTAATTTATTATGTATTTATTATTCAGCCAACATCCTCATCTCTGAAATGGTGTAGTGCAGGATCGCTAAGGAAGCTAACGGTATCAAAACATACAGCAAGCCCATAGCAACAATTCAAAATCCTCCAGACAACTCCATCCATATCATATGTTTACAAATGCATATAAAATGCATAATGCCAGAAACTCATTCAATTACCAAATACTTGCAGACTGTTCAGTGAGAATCTGGAGAAATTGTTGAAAAAGCATACGAATAGCAGCAGCAATTACTTCAAAATGTGAATGGATCTGTGAAAAACATTCTATCTTCTTTTCCAACATACTCTACAATACTCCCAAGGTCTATTTAAAAGAAAAAAATATTTTCCCTCCAAAATTAA…
CUST_13098_PI417904088	C100R027	DAB2	DAB2	DOC2	Disabled homolog 2 (Adaptor molecule disabled-2) (Differentially expressed in ovarian carcinoma 2) (DOC-2) (Differentially-expressed protein 2)	DAB2	-	NM_001139877.1,100,100.000,60,5.18e-26=XM_014124418.1,100,100.000,60,2.54e-24	XM_021603024.1,100,100.000,60,1.77e-24	disabled homolog 2 [Drosophila] (dab2)	tctttttttttttttttTTTTTTTTTGAAAGAAATTTGCGTTTAATAAACATTAGAGTATTTGCAGGGCCTTCCATCCATGTTCCTCCCTTACGAGAATAATTTCATTACAATACATTTCATTCAGTGGCACTGAAAAGCTAAGTGATTTGGGAACAGAAACAAAAACTACTACTACTGATTGGGCAAGGCATACATTAAAGTCCTCCAGCTCATTCATCACCTGATTTACTTAAAGTCACTTTTTTGTTGTTGCTGAAAACCTTTTTTTCCCCCCTTTAAGTGTACACATTTCTGTATTTATATGTGGGATATTGTTTTTCATCAGGAAAAGTTACACATTTCTAGAGTGCATCTTTAAAGTGAAGGTGGTTTGGGTGAAGCTAAGTAACTGACATCA…
CUST_7496_PI417904088	C100R117	TRF	TF1	-	Serotransferrin-1 (Serotransferrin I) (STF I) (sTF1) (Siderophilin I)	TRF	TRF1, TF, STF, TF1	NM_001123655.1,100,100.000,60,5.18e-26=XM_014190332.1,100,98.333,60,1.18e-22	-	transferrin (trf)	ttGGTGTTGACTTGGAGACTTCGAGAACATGAAACTGCTTCTCCTCTCAGCGCTGCTGGGGTGCCTAGCTACGGCGTATGCTGCCCCAGCTGAGGGAATTGTTAAATGGTGCGTAAAGTCGGAGCAAGAGCTGCGGAAATGCCACGACCTCGCAGCCAAGGTGGCGGAGTTTTCATGTGTGCGGAAGGACGGCTCTTTTGAATGCATCCAAGCCATCAAGGGGGGTGAGGCTGATGCTATCACTCTGGATGGAGGAGATATTTACACAGCTGGCCTCACCAACTACGGCCTGCAGCCCATCATTGCAGAGGACTATGGTGAGGACTCTGACACCTGCTATTATGCTGTGGCCGTGGCCAAGAAGGGCACTGCCTTTGGGTTCAAAACCCTCCGTGGCAA…
CUST_18926_PI417904088	C189R017	EPHX2	EPHX2	-	Bifunctional epoxide hydrolase 2 [Includes: Cytosolic epoxide hydrolase 2 (CEH) (EC 3.3.2.10) (Epoxide hydratase) (Soluble epoxide hydrolase) (SEH); Lipid-phosphate phosphatase (EC 3.1.3.76)]	LOC106611412	HYES	XM_014211599.1,100,100.000,60,2.54e-24	XM_021583065.1,100,98.333,60,8.25e-23	bifunctional epoxide hydrolase 2-like (LOC106611412), transcript variant X2	taatTTTATCTCCGAAGTGCTTTCTTCTATTGTGTGAATGTGTGTACAGCATTACAGAGGAAAGCTGTTTGATGATACACTCTCCCTCCTCCACTCTCTCCTCTTCCTCCACTCCCTCCTCTTCCTCCACTCTCTCCTCTTCCTCCACTCTCTCCTCTTCCTCCACTCTCTCCTCTTCCTCCACTCTCTCCTCTTCCTCCACTCTCTCTCCTCTCTTGCAGTTCTTGACACAAACCGGTGCGCCTGGCACCTACTACCATACCCCGTTTAAAGGCACTTGAATCTTATGTCTTGTCCATTCACCCTCTGAATGACACACATACACAATCCGTGTCTCAATTGTCTCAAGGCTTAAAAAATCCTTCTTTAACCCTATTCGTAGAGGACTAGTGTTACTAT…
CUST_16343_PI417904088	C166R036	SH3PXD2A	-	-	-	LOC106586780	-	XM_014174425.1,100,100.000,60,2.54e-24	XM_021556949.1,100,95.000,60,1.79e-19	SH3 and PX domain-containing protein 2A-like (LOC106586780), transcript variant X4	cagattgtggattgtagatgacatggcaagaacgagagaacgagacagagatagtgaacaagagagagtgagaatgagagAGAGAAAGAGGAGCTGGATACAGTTGTGGAGATTGTGCTCCTCTGTTCATGCTGACTAGACTTCCGTTAAAACCAGCAGCAACAGCTTCCATCAGAGACAATGAATAACACTGCATCATACTTCCTCCTCTACTCCCATCTCCCACAGCTTGGGCTAATGAACAATCCATGTACGATGCGTGACGGTGAAATCTCATTATCAAAACATCATTTTAATTGCGGTAGTTAAAGTTTTGAAGCCCAGTAAGTCTCGCGCCGGTGGCGCCCTGATAGCGGGGCAACACAGCCACGAGGGGCTAATCTAAAACGAATGAGATTG…
CUST_8603_PI417904088	C212R001	SIGLEC16	-	-	-	LOC106578237	-	XM_014156890.1,100,100.000,60,2.54e-24	XM_021619354.1,100,96.667,60,3.84e-21	sialic acid-binding Ig-like lectin 16 (LOC106578237)	AGAATTTCTCAAATCAACTTTATATCATGAATATTAAAAGTACAGGAAATACAGCAAATAGATAGCTCCGAGGGTAATGTTTCAAAGTGCTTCAGTTGTCATTGGAATATAGATATACAAAATAATCTACAAGTCTACATCTCGTCTGTGTACTGTGAAGTGCGTCACCACTAGTATGCTACATAAGGTTATACATTTCCTTGAAAAAAAATCCACACCACGTAAAAGCATTGAGGTGAAAAGGCACATTTGTGATACAGCAGTCACATATTTGCAACGTAAGAGGCATTCCTTTTGTGAGCCCAAGGCTGCAAAAGTGCTGGTGGTGAGCAATTTAACTCAAGGTAACCTCCTTGAGAAAAATGTTTGCAGCTGCATCGGGTTCACACAGTATATAAG…
CUST_1295_PI417904088	C086R020	-	-	-	-	LOC106567173	-	XM_014136177.1,100,100.000,60,2.54e-24	XM_021566129.1,100,96.667,60,3.84e-21	uncharacterized LOC106567173 (LOC106567173)	aagcaaaccagacagcaCAATTTTTCTAGTTTTATTTACGGATAGGCAGGGGCACACCAACATCTACAAACAAAGAATGTGTTTAGGGAGTATGCCAGAGGCAGTAGGATGACCAGGGATGTTCTCTTGATAAGTGGGTGAATTGGACCATTTCTGTCCTGCTAAGCATTCAAAATGTAATGAGTACTTTTGGGTGTCAGGGTAAATGTATGGAGTAAAAAGTACATTCTTTAGGAATTTAGTGAAATTGTCAAAAATATAGATACCCCAAAAAATTACTTAAGTAGTACTTTCAGGTATTTTTACACCACTGGACTTTAGACAACTGAAAAGTGGGATAGTAAAAATTGTGGATTTTAAGTAACCCTGTTTATCAAAACATTTGTGCAAGTTAAAATC…
CUST_14233_PI417904088	C073R021	CCDC108	-	-	-	CCDC108	-	XM_014165712.1,100,100.000,60,2.54e-24	XM_021580045.1,98,98.305,59,2.97e-22	coiled-coil domain containing 108 (ccdc108), transcript variant X5	CCAAAAACATTTTTTGTTTATTAAAAAGGAATTCAGTCCACAGTAGTTAAGACTTTGGCACCTACAATAAACATTTTTTTTTTTAACAAAACGTGTGCACCCCAAATAGCATTAAAAAAAAATGCTTGGATAAAAGGGATAAATAAAAACACATTTTTTTTTTGTGTGAAAATTAAAAACAGCAGTTGAGATCGGTATAAAACAATGCAACTCAACTGGCAGCCATCTTAGAGCTTCCGTCCACAAAATGGCAGAAGTACATGAAAACAACAGATACAATTCTGAACATTGAATGAACACCCACTTGCAGTGTACCTCTGTGATACAACTCTTGCATTAAAGACCGTGCTTGGTTTTAAAAAGGAATGTATTTTATTTTTTGACTGGTAGTTGAAGTCT…
CUST_36034_PI417904088	C057R041	HBEGF	HBEGF	HEGFL	Proheparin-binding EGF-like growth factor [Cleaved into: Heparin-binding EGF-like growth factor (HB-EGF) (HBEGF)]	HBEGF	-	XM_014198142.1,100,96.667,60,5.50e-21	NM_001165167.1,100,100.000,60,1.55e-26=XM_021617190.1,100,100.000,60,1.77e-24	proheparin-binding EGF-like growth factor (LOC106603916)	gggggGTGCGCCCAAGGCAGTAGACTGGGATACAGAGGTCACAAGCAGAGAAGCAGCGACACCTTTAGCTTACTGGACACGTTTAACTCGGAATAGATCGTACCGTGGAATTTATATCAAAAGGATTTACGCCTCGTTCTGAGTGTATTTTCGCCAACTCAAAAGAAAAACAGCGATGAATATTTATCTCAGATTTGCAATCTTTATAGTTATGGATCAGTGTCTTTCAGGATATCAAGTGGTACCTCTGCCAATACCATTGACAGGCACGGGGATAAGTCTCCCGTCCAATTAGCTGCGGTCAGTCTCCTCCACAATGATAAGGAAATAAGAGACAACCAGCTAGAATATGACGAGGAGGAATACTATTATGAACATGGTGATGAGGACTATCTGTCT…
CUST_4425_PI417904088	C223R099	CHIA	CHIA	-	Acidic mammalian chitinase (AMCase) (EC 3.2.1.14) (Lung-specific protein TSA1902)	LOC106577510	-	XM_014155599.1,100,98.333,60,1.18e-22	-	acidic mammalian chitinase-like (LOC106577510)	ctggttgctccagctgcaagcacactttgcacatgatcaaaacaggcatgattaattctgtgtatggagctccaacctgaAACATACTCACTCCTGCAACTACACAAGGCCCCATCAACTACGCCACGTGGACAACGAATGTATATGCCATTGACAACTGAAGGCCCTACACAGCCACAGGAACAAGTATACTTCAAGCCAGAACTCCATACACAGAACCAATCATGTGACCAAATATTTAGGATGAGCCGAGGTCACCATTTCATGGAGTCCAACTCTCCCATAGGTCAAATAACAGTCCTAGGGCCAGTTGCAGCATTTGCAGCTGTCACTGAAGACTAGGCCAGCGGGGCAGCTCTGGATCCAGGTGATGCCGTTAGCACAGTTATAGAAAGAGCT…
CUST_40673_PI417904088	C105R010	LIPG	LIPG	-	Endothelial lipase (EC 3.1.1.3) (Endothelial cell-derived lipase) (EDL) (EL)	LOC106585939	-	XM_014172689.1,92,98.182,55,7.11e-20	XM_021605119.1,100,100.000,60,1.77e-24	endothelial lipase-like (LOC106585939)	aggaagcaggctgacaatgctgacccgaccttctacgtgaaactgtatggcgctcacaacgacagccaagacttgcatgtAGACATTCCTAACAAAGTGGGTTTGAACCTGACCAACACCTTCCTGGTCTTCACCGAGGATGACATTGGGGACCTGCTGAAGATCCGTCTGAGCTGGGAGGGGGCGTCTGAGTCCTTCGGGTCCTTCTGGAAAAGCATTAAGAAGAACTTCTGGGACTGGAAGAGCAGCAGCAAGCCCACCAACCAGGTGTTGGAGGTCCGTAGGATCCGTGTCAAGTGTGGAGAAACTCAGAAGAAGTTCACGTTCTGTGCCCAGGACCCCTCGTTGACTGAGATCACTCCAGGACAGGGGATCGCGTACGTCAAGTGTCGCGATGGC…
CUST_2070_PI417904088	C069R013	-	-	-	Putative serine protease K12H4.7 (EC 3.4.-.-)	LOC106581020	-	XM_014162679.1,100,100.000,60,2.54e-24	XM_021588343.1,98,96.610,59,1.38e-20	putative serine protease K12H4.7 (LOC106581020)	aatattGGGAAATACCCTTTATTTTCAAAGAATTTACTGGAAGAGGATAGTGTAAATCAAATCTGATTAATCTCTTAAAAGTTGTATTTGTCATGTACAAAAGACAACATTACATTGATATAATCAATAGTCCTTCCATTCTTATAGCACAGTCACTATTGTACAACTGTGGTCATTTTCTTTCTCCAAACAAACATAAATCCTTCTCATTCAGGCTGATTGGCCACCGTGGCTGTCCCTCACTTCTCCTTCAGCCACTTCTGTAGGAGCTGGAAGACGTGTTCCCGAGCCAGGGTCAGCTGGGGGAGATCCTCAGCTCTGGCAGGGTACATGTTGGCACAGTGGGCTGTTCCCTTTATGAAGATGGCAGGGAGGTCATCTGAGATGCTAGAGGTGATG…
CUST_30076_PI417904088	C057R009	ATP6V0D1	ATP6V0D1	ATP6D	V-type proton ATPase subunit d 1 (V-ATPase subunit d 1) (P39) (Physophilin) (V-ATPase 40 kDa accessory protein) (V-ATPase AC39 subunit) (Vacuolar proton pump subunit d 1)	LOC106568806	-	XM_014139470.1,100,100.000,60,2.54e-24	XM_021612850.1,100,98.333,60,8.25e-23	V-type proton ATPase subunit d 1-like (LOC106568806)	GTCCCACCAAAATGTCTGGATTCCATAGATTGTTCTGTCACTCATTATACAATTGTTCATGTGCTATAATAGAGTCAATATTTGAAGCCTTTTGTTTATAAAAAAAAAGAGTTGAGTATCTATGCAGCTGTTACATTTATCAGAACTGTATTTTTTTACTTTTTATCAATTTTGACAACCGTTGCTAATATTACTACTAATACAAACAGGTGTGTAACTGCTACTACAGACAGCGTGTTCGTCCTTCAGAAGATGGGGATGTAGTTGTTGATCTTAGACTTCTGTCTCTGTGTGACACACTCTGCGATCCAGACGATGTTGCGAGCCTCCTGCTCCTTCAGCTTGATGTAGGAATAGAACACGCCCAAATGGAACTGCTCCAGGAAGGCCAGCGTGTTC…
CUST_34126_PI417904088	C195R008	ZDHHC7	ZDHHC7	GRAMP2	Palmitoyltransferase ZDHHC7 (EC 2.3.1.225) (GABA-A receptor-associated membrane protein 2) (Zinc finger DHHC domain-containing protein 7) (DHHC-7)	LOC106561068	-	XM_014124686.1,100,96.774,62,1.53e-21	-	palmitoyltransferase ZDHHC7-like (LOC106561068), transcript variant X3	ACCAGTTTGTAACATGTGTCAAAGTCCAGTGGAGTGAGTGCAGTGACTTTTCCCCTCCGGTGACGGTGATGCTGATGATCTTCCTCTGCCTTGAGGGCCTCCTCTTCCTCAGCTTCACAGCTATCATGTTTGGCACTCAGGTCCACTCCATCTGCAACGATGAGACAGAGATTGAGCGTCTGAAGAATGAGAAGCCCACGTGGGAGAGGCAAGTTCGCTGGGAGGGCATGAGGAGCGTGTTTGGGGGCCAGCCGTCCCTGCTGTGGATCAACCCGTTTGCCGGTCTCCGACTGCGCCGGCTACTCACTACTAGCTCCCGGAAAGCCGGCGCCGAGTTCTCAGTCTGACCTCTCACATTATGAGCAGCTTCGTACAGGAACTGTCTGGAACAATCTTTGG…
CUST_10278_PI417904088	C215R111	GRN	GRN	-	Progranulin (PGRN) (Acrogranin) (Epithelin precursor) (Granulin precursor) (Proepithelin) (PEPI) [Cleaved into: Paragranulin; Granulin-1 (Granulin G); Granulin-2 (Granulin F); Granulin-3 (Epithelin-2) (Granulin B); Granulin-4 (Epithelin-1) (Granulin A); Granulin-5 (Granulin C); Granulin-6 (Granulin D); Granulin-7 (Granulin E)]	GRN	LOC106601556	XM_014193860.1,100,100.000,60,2.54e-24	XM_021625509.1,100,98.333,60,8.25e-23	granulins-like (LOC106601556), transcript variant X2	TTGGCATTGTCAAGGAGCGCGGACACCTGTAAAGTCACTGAGATAGAGATGCAGAGGTATCTGGTGCTCTGTATGGCCCTGCTGGCCCAGGTCTCTGCTGATGACTGCCCAGGAGGAGAGGCGTGTGAGGAGGGCAACACCTGCTGCAAGGTCCCCTCCGATGGCTATGAATGTTGCCCAATGTATCAGGCTGAGTGCTGTGAGGATCATATCCACTGCTGCCCTGAGGGAACACTCTGCGTTGTGAATGAGTCCATGTGTGTGAATGGAACTGTCTCCCTACCATGGGTGGAGAGAGTCTCTGCTAAACAGTCCATATATCCTAAATCTTTCAGAATGATCAGTGCAAATGCCGGGGATGAGGATGATAACATCTGCCCTGACAAGTCCCACTGCCCC…
CUST_5796_PI417904088	C220R168	B3GNT3	B3GNT3	B3GALT8 TMEM3	N-acetyllactosaminide beta-1,3-N-acetylglucosaminyltransferase 3 (EC 2.4.1.149) (Beta-1,3-galactosyl-O-glycosyl-glycoprotein beta-1,3-N-acetylglucosaminyltransferase) (EC 2.4.1.146) (Beta-1,3-galactosyltransferase 8) (Beta-1,3-GalTase 8) (Beta3Gal-T8) (Beta3GalT8) (b3Gal-T8) (Beta-3-Gx-T8) (Core 1 extending beta-1,3-N-acetylglucosaminyltransferase) (Core1-beta3GlcNAcT) (Transmembrane protein 3) (…	LOC106613654	-	XM_014216144.1,100,100.000,60,2.54e-24	XM_021603563.1,100,100.000,60,1.77e-24	N-acetyllactosaminide beta-1,3-N-acetylglucosaminyltransferase 3-like (LOC106613654), transcript variant X2	ggatgagaaggtcttctcgtttgcttgaggtgacagctttacttgtgataggcattctgtgcttggtcataattttttcccctcctgatgaaccctctaaccatgtccagataaacagaatggaatcaacctaccaaaacagacctcagaaaccaaccagtgagagcgcaggtgttttcacctggggccgttgtgaatggaatgagtctgccgccaatgtgtcagggttttcctctctgcctggtcacatccaaaacttcctcttctatcgtcactgccgccactTCCCAATGCTGCTGGACGTACCTGATAAATGTGGAGGCCCTCACAAGTCTGCTGACGTCTTCCTTCTGCTTGTCATAAAAAGCTCACCTGTGAATTACGACCGCCGTGAGGTAC…
CUST_32718_PI417904088	C247R030	SLC12A9	SLC12A9	CIP1	Solute carrier family 12 member 9 (Cation-chloride cotransporter-interacting protein 1)	-	-	-	-	0	GAAGTCTTATCAAAAAGGGGTTTAATTGTTTTCTCAACTGTTAATTTCCTTAAAACCCAGCCAAACTGATGACATTTGGACATTTTGCACAGGAACAATCTTTTCACTGTTGTGGAGTTTCCTCCACGGTCCCTAACCAAAACAGACAACTTTACCGGTGTTAACTACATTACTAATTCATTCATTCATTCATGTAAAACATTCTGGTTAGCACTACTTTTTTAGTCAGAAGCTGCATGTATAATTATAGTTGACAAATGGCCTATCAAATGCTGGAAATTATAAGCAGAAATGTATCTAAATTAGGGGTGGAAGTAGCCGAAGCCACCAGGCTATACGGTCCAGTAGGCTACGGTGTATCAGCAAAATAAATTATTATGGTGGATGGAAATGCGCAGG…
CUST_5735_PI417904088	C236R104	SLC12A4	SLC12A4	KCC1	Solute carrier family 12 member 4 (Electroneutral potassium-chloride cotransporter 1) (Erythroid K-Cl cotransporter 1) (hKCC1)	LOC106562414	-	XM_014127286.1,100,100.000,60,2.54e-24	XR_002471029.1,100,98.333,60,8.25e-23	solute carrier family 12 member 4-like (LOC106562414), transcript variant X2	CCAGAGAACTTCAGAGAACTCATGAGCCTCAAACCGGACCAGTCCAATGTGCGGCGGATGCACACGGCAGTGAAGCTGAACGAGGTGATCGTCAACAAGTCCCATGATGCTCGTCTGGTGCTGCTCAACATGCCGGGGCCGCCACGCAACACAGACGGAGACGAGAACTATATGGAGTTTCTGGAGGTGCTGACGGAAGGTCTGGAGAGAGTGCTGCTGGTGAGAGGAGGAGGACGAGAGGTCATCACTATCTACTCCTGACCTATCGGAAACCACTCGGGTCACAGGTCACGACACTGCCTCGACAGGAGACATTCCACCCCGACCACTGGGGGCACTGCAGCACCGGCAGCAGCATCCAGCCGATCCTCAACATACAGTACATACAAACTGTGCCAA…
CUST_9896_PI417904088	C010R026	RHG15	ARHGAP15	-	Rho GTPase-activating protein 15 (ArhGAP15) (Rho-type GTPase-activating protein 15)	RHG15	-	NM_001140026.1,100,100.000,60,5.18e-26=XM_014165510.1,100,100.000,60,2.54e-24	XM_021579740.1,100,95.000,60,1.79e-19	Rho GTPase-activating protein 15 (rhg15)	ttggatctgagggtgattgATTTGATAGAAAGATGGCGGGGATGAGAATCACCAATCAGAGCGTAGGGAAACAGCCGCCTCTGATTCTGCCCCACCAGGTGACCGGAGTGGCACCAGGTACGGTCCCGATGCGCATCAAGACCTCTCAGAGCAGCGGGGATCGCCTGAGTCAAACCAAGTCCATGGTCCTGCAGGACCCCGACCTGCCTCCCAGAACTATCTCTCGCCACCGGAGGAACCAGTCTCAGCATAACATTGGTGGAGCTGGAGCCGTAGAGACTCCTGTTGTTTTGAATGGTGAATATTTGAATAAAGCCAAAATATCCGAAGGAGGCAAAAAAACTGAGGAAGAATTGGACTTCAACTTGGGTAGTCCTGGACACAGATAAACTTCTGTTT…
CUST_23272_PI417904088	C078R080	TESK2	TESK2	-	Dual specificity testis-specific protein kinase 2 (EC 2.7.12.1) (Testicular protein kinase 2)	TESK1	LOC100195200	XM_014171023.1,100,100.000,60,2.54e-24	-	dual specificity testis-specific protein kinase 2 (LOC100195200), transcript variant X2	TCTTTTTTTTTTTTTTTTTTTCTCTGTACTAGAAAAAACTTTTATTGAAAGAAGCAATTCATTTGTAAAATACATGTACATGTTTCAAATATCACTTTTTTTCTTTAAATGCCTATTTTTCATTTCTTACAAATGTCTTTAGCTTTTCAGAGTAATGGTGCACAAAGTCCAAATAAAGTAAGAACTTCCTTCATAGAATATCACAAAGACCTGCCAGAGCAGAGGAGGAGGGGATATTTAATAATATTTTAAAAACCTAAAATTCGAAAAAAGTTTTATGACAGGAGGAATGTCTAGATTGTTCAATTTGAACTATTATTTGATATGATTTAAAAAAAAAAATAGCTCAATAAAAATATAATTTTTTACAACAACAAAAGCTAATAAAATATATCTCTA…
CUST_2834_PI417904088	C066R088	GRN	GRN	-	Progranulin (PGRN) (Acrogranin) (Epithelin precursor) (Granulin precursor) (Proepithelin) (PEPI) [Cleaved into: Paragranulin; Granulin-1 (Granulin G); Granulin-2 (Granulin F); Granulin-3 (Epithelin-2) (Granulin B); Granulin-4 (Epithelin-1) (Granulin A); Granulin-5 (Granulin C); Granulin-6 (Granulin D); Granulin-7 (Granulin E)]	GRN	LOC106601556	XM_014193860.1,100,98.333,60,1.18e-22	-	granulins-like (LOC106601556), transcript variant X2	TTGGCATTGTCAAGGAGCGCGGACACCTGTAAAGTCACTGAGATAGAGATGCAGAAGTATCTGGTGCTCTGTATGGCCCTGCTGGGCCAGGTCTCTGCTGATGACTGCCCAGGAGGAGAGGCATGTGAGGAGGGCAACACCTGCTGCAAGGTCCCCTCTGATGGCTATGAATGTTGCCCAATGTATCAGGCTGAGTGCTGTGAGGATCATATCCACTGCTGCCCTGAGGGAACACTCTGCGTTGTGACTGAGTCCATGTGTGTGAATGGAACTGTCTCCCTACCATGGGTGGAGAGAGTCTCTGCTAAACAGTCCATATATCCTAAATCTTTCAGAATGATCAGTGCATATGCCGGGGATGAGGATGATAACATCTGTCCTGACAAGTCCCACTGCCCC…
CUST_13742_PI417904088	C149R003	CLCC1	CLCC1	-	Chloride channel CLIC-like protein 1	CLCC1	-	NM_001165310.1,100,100.000,60,5.18e-26=XM_014151388.1,100,100.000,60,2.54e-24	XM_021608861.1,100,96.667,60,3.84e-21	Chloride channel CLIC-like protein 1 (clcc1)	ttggtgaagaagaacgtcgccaaagacagtttgacgttatttattactgtgtttatgagacccgagttatatgtagcttaGCTAGAGTAGCCTCCAAATATCATATTAGTAACGTTAGCTAGCTAGCCGTCTTGAAATGAAGATGTCAACAAGTGCTGTCACGATGTTAATCATCACTGCTACTGTATGCAGCCTGTTGCTCGTTGCTCAAGGGCAGGTGGACGATGAGGAATGGATTGATCCCTATGATATGTTGAACTACGAACCAAGCACAAAGACCATGAGAAAGCCTGCTGAGGTTTCACAGCTGCCTTCATGCAATCTGGTGTTCAAGCAATTCCTCACCAAGTTTCTGAAGGAGATTGAAAGATTTGGCCTGCCCAGTGATTTCCAGAATGA…
CUST_6338_PI417904088	C019R162	LICH	LIPA	-	Lysosomal acid lipase/cholesteryl ester hydrolase (Acid cholesteryl ester hydrolase) (LAL) (EC 3.1.1.13) (Cholesteryl esterase) (Lipase A) (Sterol esterase)	LICH	-	NM_001139859.1,100,100.000,60,5.18e-26=XM_014178868.1,100,100.000,60,2.54e-24	XM_021575755.1,100,96.667,60,3.84e-21	Lysosomal acid lipase/cholesteryl ester hydrolase (lich)	ttggacaaaagcagtagggagcctctgacgttttatcacgctgcagctcctgtgacttcctcttcatttggccaacaaagAATACAGCATTATTATTCTACACAACAGAAGTTGTCCGGACTGAAGATGGTGTGGGCACTACTTTTAATAGCCTTCCTGACCACTGGGGCGGTCCAGTGTCAGAGATCCTTGCTGAAAGACAAAAAAGGACTGGACCCAGAGGTCAACATGAATATTAGTGAGATCATCAGGCGTTGGGGCTACCCGGCAGAGGAGCATGACGTAGTCACAGAAGACCTCTACATCCTCAGTGTCAACAGGATCCCGCATGGCCTGAAGAACAGTAAAGATCCCAAGCCTGCAGTGTTCCTCCAGCACGGTCTCCTAGCTGCGGGGAGT…
CUST_24473_PI417904088	C261R073	STAT1	STAT1	-	Signal transducer and activator of transcription 1-alpha/beta (Transcription factor ISGF-3 components p91/p84)	LOC106586142	-	XR_001324136.1,100,100.000,60,2.54e-24	-	signal transducer and activator of transcription 1-alpha/beta-like (LOC106586142), transcript variant X3	CACACGTTTTCTGAAGCGCAGGGCAGGGGTTGTTAGTGGAGGAACCTTTTCCCATCTATCTTGACTTCACCTTTTTGTACCGTTTTCAACATTAATCAAGATGGCCCACTGGTTCCAGCTGCAGAAATTAGACTCCAAGTACCTGGAGCAGGTGGACCAGCTGTATGATGATACTTTCCCTATGGAGATCCGCCAGTACCTCAGTGCCTGGATAGAGAGCCATGACTGGGACACGGTGGCAGCCAGCGTTTCCCTGGCGACGGTCCGTTTCCATGACCTCTTGGGCCAGTTGGACGACCAGTACAGCCGCTTCTCCCTGGAGAACAACTTCCTGTTGCAACACAACGTACGCAAGATTAAACGCAAACTGCAGGACCACTTTCAGGAGGACCCTTTGCA…
CUST_24274_PI417904088	C115R165	OXER1	HCAR2	GPR109A HCA2 HM74A NIACR1	Hydroxycarboxylic acid receptor 2 (G-protein coupled receptor 109A) (G-protein coupled receptor HM74A) (Niacin receptor 1) (Nicotinic acid receptor)	OXER1	-	XM_014200604.1,100,100.000,60,2.54e-24	-	oxoeicosanoid [OXE] receptor 1 (oxer1), transcript variant X2	CTGCTGTtcTGCTCAGCCAGGATCGCCtGcatcctGCGccaaCGGCAGCTGGACAAAGAGAAGAAGGTGCGGCGggccATCCGGGTGGTGGGGCTAATTGTGGCTGTGTTTGTGCTGTGTTTCTTTCCTGGCATCGCTACAGGCCTGGTTTCGCTCTATATCAAGGCGTTCAGACCCTGGGACTGTGACTCCTTCAAAATGGCAGGCCAGCTTTTCAGCCTGTCCATTGGCTTCACCTACCTTAACAGCGCCCTGGACCCGGTCATCTACTGCTTATCCAGCTCAATGTTCCAAAACTCCCTCAAGAGCTCCATCAATAAGATGGGCCTGGTGGAGTTGAGGCTGAGCCGACGGGGAAGCATGGCCAGCGATGGGTAAGGGGAGATGGTGTGAGGAGGC…
11_1_14_14	C228R030	-	-	-	-	LOC106567173	-	XM_014136177.1,100,100.000,60,2.54e-24	XM_021566129.1,100,96.667,60,3.84e-21	uncharacterized LOC106567173 (LOC106567173)	aagcaaaccagacagcaCAATTTTTCTAGTTTTATTTACGGATAGGCAGGGGCACACCAACATCTACAAACAAAGAATGTGTTTAGGGAGTATGCCAGAGGCAGTAGGATGACCAGGGATGTTCTCTTGATAAGTGGGTGAATTGGACCATTTCTGTCCTGCTAAGCATTCAAAATGTAATGAGTACTTTTGGGTGTCAGGGTAAATGTATGGAGTAAAAAGTACATTCTTTAGGAATTTAGTGAAATTGTCAAAAATATAGATACCCCAAAAAATTACTTAAGTAGTACTTTCAGGTATTTTTACACCACTGGACTTTAGACAACTGAAAAGTGGGATAGTAAAAATTGTGGATTTTAAGTAACCCTGTTTATCAAAACATTTGTGCAAGTTAAAATC…
CUST_26765_PI417904088	C203R104	FCRL5	FCRL5	FCRH5 IRTA2	Fc receptor-like protein 5 (FcR-like protein 5) (FcRL5) (BXMAS1) (Fc receptor homolog 5) (FcRH5) (Immune receptor translocation-associated protein 2) (CD antigen CD307e)	LOC106589966	-	XM_014180436.1,100,100.000,60,2.54e-24	XM_021595888.1,97,98.276,58,1.07e-21	low affinity immunoglobulin gamma Fc region receptor II-b-like (LOC106589966)	gggGGGGAAAACAACAAGGGTCTTCATGCAATGTGTCACTAATACCATCAGACAGTGGAGTGTACTGGTGTGTGTCTGGGTCTGGAGAACACAGCAATGCTGTCAACATCACAGTACATGCTGGAGCTGTGATCCTGGAGAGCCCTGCCCTTCCTGTGACTGAGGGAGATTCTGTGACTCTGCGCTGCAGATATCAGGGAACTCCCTCTGACCTCACAACTGATTTCTACAAAGATGGATCCCTCATCAGGGCTGAGACTACAGGAGAGATGACCATCCCTGCAGTATCCAAGTCAGATGAGGGACTCTACAAGTGTACCAACTCTGAAGGAGAATCACCAGAGAGCTGGATGACTGTGACAGATCTCTCTCTTCCAGCCTCTCTGAGTGTCAGTCCTG…
CUST_25755_PI417904088	C005R144	PACA	-	-	Glucagon family neuropeptides [Cleaved into: Growth hormone-releasing factor (GRF) (Growth hormone-releasing hormone) (GHRH); Pituitary adenylate cyclase-activating polypeptide (PACAP)]	PACA	-	NM_001139927.1,100,100.000,60,5.18e-26=XM_014180582.1,100,100.000,60,2.54e-24	-	Glucagon family neuropeptides (paca)	gcacgagggggaagcaagtcttcAGAACAAAAAGTTTCCTCTGTGAAGACAAATGTTTGGCCTCTTTCTCCCGGGGTTGTGTGCATACAGAGATCCGAGAATCGCGTTTTATGTGTGACCGCACGGAGGGTTGGACAAATTGAAGGAGCAACAGGAGGCGGCAGAGACGCTTTCCAGAAGAAGCAAGGGGAGAGAGAGAGGGAAGGAGAGAAAGGGAGAGAGGGAGACTATCTCACTCTCCCAGTCGTAGTCGCACCCGGATCGCATACAGCGTCTCTCTCGACACTGCAATAGCAGGACAATGTCTAGTAACGCGACTTTAGCCTTACTCATCTATGGAATCATAATGCACTACAGTGTCTACTGCTCACCTCTCGGGCTTAACTATCCTAACCTTAG…
CUST_13172_PI417904088	C064R111	FCGR1A	FCGR1	FCG1	High affinity immunoglobulin gamma Fc receptor I (IgG Fc receptor I) (Fc-gamma RI) (FcRI) (CD antigen CD64)	LOC106580961	FCGR1	XM_014162559.1,100,100.000,60,2.54e-24	XM_021587750.1,100,98.333,60,8.25e-23	high affinity immunoglobulin gamma Fc receptor I-like (LOC106580961), transcript variant X2	ggaagaacactcaacatgaagctcttactgagcctccttgttgtttcaacactacctcaattggctgaactacaagtcctccccaccagtGCTCCGCAGATGGCCGTGGCTGAGCTAGTCAAGGGGGTACCCTGGATCTTCTCAGGGGAGAGCGTGCATCTGAAGTGCAGTGTTCCTGGGAATGTGTCAGCCGAGTGGAGGTACCGGTGGTTCAGGGGGGGCGAGCAGCTCCAGGAGTCTGAGTACTTTGTCCTCTGGAAGGCCAGGCCACAGCAGAGTGGGAAGTACTACTGCCAGGGCCTGAGAACCACATGGATAAGCACCCAACACACCCTCCACAGCCTGCCTATAGAAATAGAGGTGGACGGTGGGTGGGCCATCCTGCAGGCCCCGCCCCTG…
CUST_20486_PI417904088	C044R093	TRAM2	TRAM2	KIAA0057	Translocating chain-associated membrane protein 2	TRAM2	LOC106607554	XM_014204593.1,100,100.000,60,2.54e-24	XM_021600043.1,100,98.333,60,8.25e-23	translocating chain-associated membrane protein 2-like (LOC106607554)	aaaagtcGGGAAAAAGTCATTCTGCTGAAATGGCATTCCGGAGGAGAAACAAGAGTTATCCCTTCTTCAGCCAGGAATTCTTAATACAGAATCATGCCGATATCGTCTTTAGTTTGGTCATTTTCATTCTGATTGGATTGATGTTTGAGGCAACAGCAAAAACTGCAATACTGTTTATTCAACCCCAGTACAACATCAGCACCCAGTCACCAGAGGGAGAGGTGACGTTGTACCAGTACGGCTGGCGGGACTGGGCCACCATCCTCTTCTATTTCTTCATCACCATCATCCTCCACGCTGTGGTGCAGGAGTACGTCCTGGATAAAGTGAATAGGCGTCTCCATCTCTCGAAAAGCAAGAACACCAAGTTTAATGAGTCAGGCCAGCTGTGTGTGTTTC…
CUST_14560_PI417904088	C247R044	BPI	LBP	-	Lipopolysaccharide-binding protein (LBP)	BPI	-	NM_001141727.1,100,100.000,60,5.18e-26	XM_021566584.1,100,98.333,60,8.25e-23	Bactericidal permeability-increasing protein (bpi)	gcacgaggttttTTTAACGCTCATCGCTTTTATTAGAATGTTTACAGTGTGAACAATGAAACAATGAATAAAACATGCCGCAAGAGGTACTGGATCAGGGTAAATAGGTCAGAATAGGCAACCGAAATTAATAATTAATGTATGTGTGTTATATTAAACATAGAGGAGGGAGTAAAATGTAGGCAAGCAATAAACATTTCAGAACAACTAGTAGTAGAATAAGACATGGGAGAGATGACACATTTTGGCAAAGAGATTTATTTATAGACTAATACACTTGAAACAAATAGCCAAACCGAAAACTGCAGACATTGCTGGTGCCTCCCCCGCGATCAAAATGACATCAAAAATAAAATGAAATGGAGCCTAACGTGATCTGAAATCTCAACTAGCAAGTCA…
CUST_13666_PI417904088	C049R053	COMTD1	COMTD1	-	Catechol O-methyltransferase domain-containing protein 1 (EC 2.1.1.-)	LOC106577198	-	XR_001322078.1,100,96.667,60,5.50e-21	XM_021613824.1,100,96.667,60,3.84e-21	catechol O-methyltransferase domain-containing protein 1-like (LOC106577198)	AGTAGACCCACATTCCTTCAATAATGTCTCTTTGGTGTTCACTCTATATAGCTGAATAGACACACTTCCAAAATGGCTCCAGATATCAAGATGTATTTCTGCTTTCAGCTTGTTCTTGCACTAACAGGCACAGGAATAGGATCTGCCCTGCCAGGTAAGAGCCACAGTGGAGGGAAGAACAACCCAGTGCTGCAGTATGTCGTGAACAACTCACTGAGAGAACATCCTGTCATGACCAAACTCAGACTGAAAACCCTTGAGGACCCATGGAGCATCATGCTGGTTGCTAGTGAACAAGCACAACTGATGGCAAATCTGGCCAAACTGATCAATGCCAGCAAAACCATTGAAATTGGGATGTACACAGGGTACAACACCCTGAACATGGCGTTGGTTGTA…
CUST_1687_PI417904088	C104R118	BHLHE40	BHLHE40	BHLHB2 SHARP2	Class E basic helix-loop-helix protein 40 (bHLHe40) (Class B basic helix-loop-helix protein 2) (bHLHb2) (Enhancer-of-split and hairy-related protein 2) (SHARP-2)	LOC106582864	BHLH2	XM_014166427.1,100,100.000,60,2.54e-24	XM_021609470.1,100,96.667,60,3.84e-21	class E basic helix-loop-helix protein 40-like (LOC106582864)	gggggattgctgtgcttGGATCTCAGAGTGACACCATCACATTGACAGTCTGCAAAGCAACAGCCCGTTGAAAGATTATTCTTTATAGAAAAAGTGTTAGCTATTGAACAGAAGAACATAACAATAATAGCAAGAAGAAGAAGAAAAATATTTATTTCTTAAATTACAATATTTGCTGACTATTGAAACAGATCTGAAGAAGCCTATTTTTAAGGTTGAATTTTTTGAAGACCAATATTTGGATTTAATAAAGACGCAAAATGGAGAGGATTACAAGTGCACAACCTCCACCTTGTATGGTAAAACACCAGTTGCTGGAGATGGCAGACATGCAAGGAATGGATTTCCCAATGTACGTGTTCAAACCCCGACGGGGGTTGAAGCGCGGGGAAGACACTA…
CUST_15420_PI417904088	C134R154	ACBP	DBI	-	Acyl-CoA-binding protein (ACBP) (EP)	ASAL	-	NM_001140986.1,100,100.000,60,5.18e-26=XM_014201873.1,100,100.000,60,2.54e-24	NM_001124514.1,100,98.333,60,7.21e-25=XM_021598329.1,100,100.000,60,1.77e-24	Mannose-specific lectin (asal)	AGGAAGAAGGTGAGTATTTATTTACAAGTGAATGGGTAGATATATCCAGGTGGCGTAGCGGGCAGCGGTGGTGAGTTGATGGGAGTAAATAGGTGGATCCAATGGGGTAGCGGAATCCTCCGACGACCAGGCGGGAATGGGGTAAATGATCCGGGTGAGTAATGTTCATGGCTAACGATCCGGCAGGGAATGGATGTCAGGTCCGGGCTTATGAAGAGGAGAGATGATGATCAGGACCAGGTGTGCAGATAGCTCACTGTGATGATCAATTTGAAGAAAGAAGTTCAACAGCAGGTTAAAACAGTCCCAAACATGGTTGTTGTGGATGTTGTTTCAAAGCCCTCTTCCTGTTTACAGCTTCCGAAAACGAACCGCTCATAAATTACGTTTCTGGCGGGT…
CUST_23676_PI417904088	C059R068	CD276	CD276	B7H3	CD276 antigen (4Ig-B7-H3) (B7 homolog 3) (B7-H3) (Costimulatory molecule) (CD antigen CD276)	-	-	-	-	0	acatcagcagccaaatggctagaattttcaacgtctcctcttaagggacactgtgtttttatttaaaacataatgactagGCAAACAATCAGTCTAGATTATTCTAGTATATTTTTCTAGTAGACATGAGTGACGACGACTCATTGAGAGTCAGGCACGGACTAAACGCCAATCCTCACTACCAAACTACAGAAATAGAACGACGTAATGGTTTTCCATCTGTGCCATGTTAGGCGGTTTCTGGCGGAACATTTATTTGCTTACTAAGACGTGTTACGGTGTACCCATTTGAGACAGCCTACATTTCAGATCCGTGGAAATAGTAAAAGTCCTGATGGTGAAGTTTATTTTACAGACAGGACACCCATCAAACGATTAGAGATGTCGGAATGGTTCTGT…
CUST_320_PI417904088	C065R008	SLC16A13	-	-	-	LOC106585395	-	XM_014171548.1,100,100.000,60,2.54e-24	XM_021605567.1,100,98.333,60,8.25e-23	monocarboxylate transporter 13-like (LOC106585395), transcript variant X2	ATGCTTTTTAGAAGTATCGGGGGCTTCATTGGTCCACCTGCTGCAGGTTGGCTGGTTGACCTGGACAAAGACTTTGGTGCATGCTTCTACCTGTCTGGATTGGTTCTCATCATATCTGGTGTGTTTGTGGTGCTGGTGGACCGACTTGTCGAGCGGAAGAAGGCCTCTCCCAGTGACACTGAGCTAGAGGCCACTCAGGCCTTTGCCTACAAGATGGGAGTGAAGCTGGTTGTTAGTGAGAGCAACTGCAAATAAATGTTACTCTGTTTCAGGGGATATGGCAGTAAATGTTTGCAGTTCATGAGCTCTTGGGATGGCTTCATTCTGAGCTTGTATCGCCTAGTCAGGGTTTAATCTATCTTAAGCTGCGTCACAGGAGTAAGTAATGGAGGGTGTTGA…
CUST_33004_PI417904088	C040R101	IFIT8	IFIT5	ISG58 RI58	Interferon-induced protein with tetratricopeptide repeats 5 (IFIT-5) (Interferon-induced 58 kDa protein) (Retinoic acid- and interferon-inducible 58 kDa protein) (P58)	LOC106608578	-	XM_014206592.1,100,100.000,60,2.54e-24	XM_021580810.1,100,98.333,60,8.25e-23	interferon-induced protein with tetratricopeptide repeats 5-like (LOC106608578)	ACGAGTTACACAAGGCCTCTGCCACAGCATCCACCTCTGTACTGCAGGCCAGTACCACAGCCTCAACCTCTGTCCTGCTTGTGCCCAGAGAGGTCCACAGTGAGAAGGCCTGGTCTCTCCTCAAGTTCTCAAAGCACCACTACACAAGAGCCAAGGAGTGCTTTCAAGAGGCTCTGCAGATGGAGCCTGATGATAAGGAGTGGAACTCGGGTTTTGCCTTCTCTTTGTTCCGCCAGGAGGGCCTGGTGACTAGGAAGGACCAGAGGCTCTCCTATGAGGATTCCCTTGCTGTTAAACAGCTGAATTATGTCCTGGAGCTCAACCCAGACAGCGCAATGACCAGGGTCTACCTGGGCCTGAAGTGCTACAAGAACCGGAGGAACGCAGAGGCCTGGGGCT…
CUST_26736_PI417904088	C168R139	TNFA	TNF	TNFA	Tumor necrosis factor (TNF-alpha)	TNF-ALPHA-1	-	NM_001123589.1,100,100.000,60,5.18e-26	-	tumor necrosis factor alpha-1 precursor (tnf-alpha-1)	atTCTAACAAACGAGCAAAACACAGGACACTTATCAAGCTACTACTCTGTCAAAACAAAGAAGATATTTAGGCGAGCATTCAGTTGCTAGACTTTCCCACTGCCACCAAGAGCCAAGAGTCAAGAGTTTGAACCTCATTCAACAGAAGTATGGAGGGGTATGCGATGACAACTGGCGACATGGAGAGGGGCCCTGTGTACATGACAACGGTGACAGCTGTTGCTGAGGGAAAGGCCTCCAGAGGTTGGCTATGGAGGCTGTGTGGCGTCCTCTTAGTAGCAGCTTTATGTGCGGCAGCAGCCCTGCTCTTTGCCTGGTGTCAGCATGGAAGACTGGCAACGATGCAGGACAAAATGGAGCCTCAACTGGAGATACTCATTGGTGCAAAAGATACCCACC…
CUST_32772_PI417904088	C194R024	TER	MECR	-	Enoyl-[acyl-carrier-protein] reductase, mitochondrial (EC 1.3.1.104) (2-enoyl thioester reductase)	LOC106607757	-	XM_014205065.1,100,100.000,60,2.54e-24	XM_021600334.1,100,100.000,60,1.77e-24	trans-2-enoyl-CoA reductase, mitochondrial-like (LOC106607757)	ACTGACCCAGGAGAGAGTGCTGTCCTTGTGGCAGAGAGAGAGCAGAACCACCCTGGCCCCTGGTGCTCTACGGCAACTCCACTCCTGCTCAGCACTGGTCTACAGAAAGCACGGACATCAGTATGACACAGTCAGAATGGAGGAGATGTCCTTGCCAGCCCTGGGTCAACACAGTGTCAGACTGAGGATGTTGGCAGCACCAGTGAATCCAGCTGATATTAACATGCTACAAGGCACATACCCAATCCTTCCAGTGTTTCCTGCTGTGGGTGGGAATGAGGGAGTGGGGGAGGTGGTGGAGGTTGGTAGGAAGGTCACCTCTCTGAGACCAGGAGACTGGGCCATACCATGGGATGCCGGCTTTGGTACATGGAGGACAGAGGCAGTGTGTGAGGCTGA…
9_3_11_1	C182R163	CSRP2	CSRP2	LMO5 SMLIM	Cysteine and glycine-rich protein 2 (Cysteine-rich protein 2) (CRP2) (LIM domain only protein 5) (LMO-5) (Smooth muscle cell LIM protein) (SmLIM)	CSRP2	-	NM_001141173.1,100,95.000,60,5.22e-21=XM_014153860.1,100,100.000,60,2.54e-24	XM_021576819.1,100,98.333,60,8.25e-23	cysteine and glycine-rich protein 2 (csrp2)	GGGGGGAGTAGTTTGGTGAGTCCGCAAAGGACACGACGTCGATACGCTGGGATAAAATTGAAGGATTCTCCCACAACAAATACAGCACCAACATGCCAAACTGGGGAGGAGGTAACAAGTGTGGTGCATGCCAGGGGACGGTGTACCATGCCGAGGAGGTGCAGTGTGATGGGAAGAGCTTCCACAAATGCTGCTTCCTGTGCATGGTCTGCAGAAAGGGTTTAGACAGCAACAATGTGGCCATCCATGACACTGAGATCTACTGCAAGTCCTGCTATGGGAAGAAGTACGGCCCCAAGGGCTACGGCTACGGTCAGGGAGCTGGGAGACTCAGCATGGACCGTGGAGAGAGACTGGGGATCAAACCAGAGGAGACCCAGTGTCACAGACCCACCACCA…
CUST_11825_PI417904088	C184R021	FPR1	FPR1	-	fMet-Leu-Phe receptor (fMLP receptor) (N-formyl peptide receptor) (FPR) (N-formylpeptide chemoattractant receptor) (Fragment)	LOC106570012	-	XM_014141870.1,100,100.000,60,2.54e-24	XM_021562007.1,100,98.333,60,8.25e-23	fMet-Leu-Phe receptor-like (LOC106570012)	cgctgatgcacacagagaggacagagaagacagtgcggattgtagggacacagagacacaactatctgcacagacacacaGCATAGAACTATGCACCTCCACACTCTGTTCAACCATTGAAGCTGAAGTACTGGTCAGCTACTACTGGAGCATCGCAACTCATAGAATGACATCCAACGCCACGCTTCCATTCGTCCTCCTTGTCTCAGCCGGCCGAGATGACAAAGCCACGGTGGTGGACATTGACGCCATCATGGACAACTTCATCATTGTCCTCTACACGCTGACCATTGTCCTGGGCACCACGGGCAACTCTGTGGTCATCTGGGTGGCGGGCTTCAAGCTCAAGCCCACCGTCACCAACGTGTGGCTGGTCAACCTGGCCGTGGCCGACCTCAT…
CUST_4526_PI417904088	C208R130	MSMO1	MSMO1	SC4MOL	Methylsterol monooxygenase 1 (EC 1.14.18.9) (C-4 methylsterol oxidase)	-	-	-	-	0	cagccgcatcaagtgttgtccagtctcctcccagcccatccccaccagccaatcagaatggaggtgaacagtacggccacCATCTTGTCCTCAGCCTTCCTGGCTGTGGAATATGTTGATGCTGTCTTACCTGACAACCCTCTTCAGCCTTCACTACAATACGCCTGGGGGTATGTGAATGAGAACTACACTAAATTCCAGATCGCCACCTGGGGTTCTCTCATCGTCCATGAGGCCATCTACTTCCTGTTTTGTCTACCTGGTTTCGTGTTTCAGTTCCTTCCCTTCATGCAGAAGTACAAGATACAACAGGATAAGCCAGAGACGTGGGAGAAACAGTGGAGATGCTTTAAGATGCTGCTTTTCAATCACTTCTGTATCCAGCTGCCGATGATCTGT…
CUST_1181_PI417904088	C181R143	STLA	PKSJ	PKSK	Polyketide synthase PksJ (PKS)	LOC106579692	-	XM_014159827.1,82,100.000,49,3.31e-18	-	probable polyketide synthase 1 (LOC106579692)	GGTTCATTTGAAATCATTTTATTTAAAATTTTACAGAAGAAATTCATTACAGATTAGTACATGTTTTTAAGATTAATATAAGAATAAAGTAATATCCTAACAGATAAACATATTAAAAAGTGTAAAAACATCATTATTACAGAAATATATTTACACAAATATAGTTGCTTGGATCTTCTAAACATCAGGGAGAAATAGTATGGAGTCTTTGGTCCAAAACATCTTTCTTTACCTGTGGGATTACTGACTATAAACATACCTGGGCAGTCACTGCTACAGGTGGGAATACACCCAGACTTGGAAGGCATACTCTCTAGGTTCAGGATATGTCTCTACCGGCCACCTCTAACTATAAATGTTAAATTAAAATCTCTATAGTCTTGTGAACATGTCATCTGT…
CUST_14595_PI417904088	C126R166	UK114	RIDA	-	2-iminobutanoate/2-iminopropanoate deaminase (EC 3.5.99.10) (Translation inhibitor L-PSP ribonuclease) (EC 3.1.-.-)	UK114	-	NM_001141017.2,100,100.000,60,5.18e-26	-	Ribonuclease UK114 (uk114)	gcacgaggctTtGccccAGCAGTGtTtgtcgAGTCATAggTTTTcctgggCAGTGGTTCACTTCACTTTGTCCCAAGCTGACTTCTGCGACTGTAGTACACTCTGGACACGATGGCTGCTGTTCAGAAACTCTTTCCTTATACTCCTAGAGCACCTATAAGGCAGGGGATTTACAGCCAGGCGGTGGTGGTGGATCGGACGATGTACATCTCCGGCCAGCTGGGGCTGGACGTGGCCTCAGGGAAGCTGGTGGAGGGAGGGGTACAGGCTCAGGCCAGACAGGCTCTGGTCAATATGGGAGAGATCCTGAAAGCAGCTGGATGTGGTTATGACAATGTCGTCAAGACAACCGTGCTGTTGGCAGACATGAATGACTTTGTCAATGTCAACGATGTTTAT…
CUST_19077_PI417904088	C075R050	TRF	TF2	-	Serotransferrin-2 (Serotransferrin II) (STF II) (sTF2) (Siderophilin II)	TRF	TRF1, TF, STF, TF1	NM_001123655.1,100,98.333,60,2.41e-24=XM_014190332.1,100,100.000,60,2.54e-24	-	transferrin (trf)	gtctgcaggaattcggcacgagtgTTGACTTGGAGACTTCGAGAACATGAAACTGCTTCTCCTCTCAGCGCTGCTGGGGTGCCTAGCTACGGCGTATGCTGCCCCAGCTGAGGGAATTGTTAGATGGTGCGTAAAGTCGGAGCAAGAGCTGCGGAAATGCCACGACCTCGCAGCCAAGGTGGCGGAGTTTTCATGTGTGCGGAAGGACGGCTCTTTTGAATGCATCCAAGCCATCAAGGGGGGTGAGGCTGATGCTATCACTCTGGATGGAGGAGATATTTACACAGCTGGCCTCACCAACTACGGCCTGCAGCCCATCATTGCAGAGGACTATGGTGAGGACTCTGACACCTGCTATTATGCTGTGGCCGTGGCCAAGAAGGGCACTGCCTTTGGGTT…
CUST_35941_PI417904088	C109R098	CYSTM1	-	-	-	CYSTM1	-	XM_014213020.1,100,100.000,60,2.54e-24	XM_021583396.1,82,97.959,49,1.07e-16	cysteine-rich transmembrane module containing 1 (cystm1)	ACGAGGTGGTCGTTCAGTGCGGTAAAAAAAAAGACAAGAAATTAGCAATATAGATCACGCCGAGGAGGTTTTTTTTTGAAGAGGAGCTGGACTGTCTATTGATAAGGGATATCATTTCTCTTAAGGTGTCTCTGTTGTCTAGCAGATGAATTTTGAGCAGCCTCCTCCGTACCAGGGCCCAGGCCCCACGGCACCCAGTTACCCTGCGCAGGGCTATCCTCAGCAGGGATACCCTCCCCAGGGCTACCCCGTCAACATGGAGCAGCCTGGTGGATTCCCTCCTCAAAACCCGGCCTACCCCAACTACCCTGCTGGCCCCGGAGGCCCTCCTGGACCCTACCCTGGCCAGGGACAAGCAGGCCCCTACCAGGGGGCGTACCCAGGACAGCCCCAGTTTGG…
CUST_5955_PI417904088	C211R161	TIMP2	TIMP2	-	Metalloproteinase inhibitor 2 (Collagenase inhibitor) (Tissue inhibitor of metalloproteinases 2) (TIMP-2)	LOC106606432	-	XM_014202629.1,100,100.000,60,2.54e-24	-	metalloproteinase inhibitor 2-like (LOC106606432)	ttggatactcactggtgcgaacactggattggttctaatggaatTTAcacctcacacttTCTTtactcTTATCCTTTTGTGATATTTGGCGACCCCGTAATTCGATTCCAAATGACTCGGTATGTAAGCAGTTGTTTCTTTACTCTGTTCGTTCTTTTCCTTTGGCGGGTCGAAGACATCGCAGAAGCTTGCAGATGCCTCCCTCAGCATCCTCAACAGGCTTTTTGCGATGCAGAAATTGTGATCAGGGCGAAGGTGGTTGGAAAGAAAGCGGTGTCTAACAACATCAAGTATGACATCCAACAGATCAAGATGTTCAAAGGTTGTGACCAGGTTATCCACGCCATCTTCACTGACACTACTTCGTGCGGTGTGACTCTAGAAATCAACAAGGAGTAT…
CUST_35523_PI417904088	C152R085	INF2	-	-	-	LOC106571473	-	XM_014144623.1,100,100.000,60,2.54e-24	XM_021611339.1,95,94.737,57,8.31e-18	inverted formin-2-like (LOC106571473), transcript variant X3	GAACAGGAATGCATTCTCAGCTGGTGGGGATGGTCCAAAGAGCGGAGACACAGCGATAGATGGGAACCAGGAAAGTGGGGCTGATGGAAAGGGGTTAGAGGAGAGTCAATCATCAGAGTCCCCCTCAAACACAGCTGCTGGTGACGCAGAGCCCAAACAACAGACACAGAAACGGGGGGATACTAAGAGACATAGCGAAGACATGAGCTATGGAAAAGGCCACACTAAACCTAAAAAGAGTTGTGTGTTACATTGAGGTGGACGCAAGAAGAAGGACAAGGCCAAAGGCAAAAAGAAACAATGAATGTTGATGCCATCTTCCAGTGCTCCACCCCTGTCTGCCAAACAAATGCTATGGTATACATTAACATTATACTGTACTTAGAAATATCTATATCA…
CUST_37562_PI417904088	C093R168	CCDC87	CCDC87	-	Coiled-coil domain-containing protein 87	CCDC87	-	XM_014208514.1,97,98.276,58,1.53e-21	XM_021576963.1,97,100.000,58,2.29e-23	coiled-coil domain-containing protein 87-like (LOC106609567)	AGGCCACAGCAGCATGGGAGCGCGCTGCCCGTCTCATCCAGCAGAGGGAGTCTCTGCTGGCTCGTCTGGAGCTGTTTGAGAGGGACGCTTCTGACCCCAACCGCTTCTTCCTGCAAGGCTACCGAGGCACCTCTCTAGCCAGGATGGATGAGTCCAAGCACCGGAGAAAACTCAACTCCCAGATCTGTTCTCTGGAGAAGGTTTTGTCTAAGATTCTCCACCACATTACAGACAGCTTCCATGACACTGTCACCTACAAGGGGAGGCCGTACAGGGAGAAGATGCGCTGGGACCGCATCGAGATGCTCTACTGGCTGCAGCAGGAGCGCCGGGTCCAGGCTCTGGAGAGGTGTGGNNAAGGGGAAGGGGCTCTCTCCCCACCCAGACTGCCCCCCCTCA…
CUST_30675_PI417904088	C196R047	PIK3R3	PIK3R3	-	Phosphatidylinositol 3-kinase regulatory subunit gamma (PI3-kinase regulatory subunit gamma) (PI3K regulatory subunit gamma) (PtdIns-3-kinase regulatory subunit gamma) (Phosphatidylinositol 3-kinase 55 kDa regulatory subunit gamma) (PI3-kinase subunit p55-gamma) (PtdIns-3-kinase regulatory subunit p55-gamma) (p55PIK)	LOC106584012	-	XM_014168766.1,100,100.000,60,2.54e-24	XM_021599719.1,100,100.000,60,1.77e-24	phosphatidylinositol 3-kinase regulatory subunit gamma (LOC106584012), transcript variant X4	CCCCATCTCAGGTTTTTTATCTCAGGTTCTGGGTAATAGTTACCCCCCCACCCCCTGTCCCCTCATCCATTCCTGGGGCTGGGTGGGGGGGGTGCTCATCTCCGTGGGGCAGGGCCGGAGGATGAGGGCATCTGTGCGTAGACAGGGTAGGCCAGGCGCACATTGAGCGAGTCGTTGTGCTGGACAAGGGAGGTCTGGTGGTAGTGCAGGACCAGGTCTTTCAGAGAGCTGTACAGGTTGTAAGGCTCAGCGAAGCCGTAGCCCCTCTGCGTGCTGTAAATCACACAGTGCTTAACCTCACCCTCCACAACTACGGAGCATGCGTAGCAGCCCTTCTTGCTGCTCTCCCTGATGAGGAAGGCTCCGTCAGGTTTGCCTAGTAGAAGGTCTTCAGACTGG…
CUST_14963_PI417904088	C158R074	HLA-DPA1	RT1-BA	-	Rano class II histocompatibility antigen, B alpha chain (RT1 class II antigen, Ba chain)	LOC106564360	-	XM_014130418.1,100,100.000,60,2.54e-24	-	H-2 class II histocompatibility antigen, A-Q alpha chain-like (LOC106564360)	AAGAGCAGATCTTAGCAATTACATTAAACTCTTCAGCCTTGAAACCCCAGAAGCTAAAGTTCCTCCTGAGATCAAATTGTATGCCAAGGAAGAAGTGAAACTGGGAATAAACAACTCTCTCGTCTGCTTCATCAATAATTTCTTTCCTCCGCCTGTCCAAGTCAAATGGACCAAGAATGATGAGAACGTCCCCAAGGGGGTTAAAGTGGGTCAATATGCAACCAACAGTGATTACACTTTCTACCGTTTCTCCACTCTGACCTTTGAACCACAAGAGGGAGACATCTACACCTGTATTGTGGATCACATGGCCCTAGATGAACCTTTAACCAGGACATGGGAGTTCGAGGTGCCCCCCCATCCCAGTGTTGGTCCTGCTGTTTTCTGTGGACTGGGTCT…
CUST_32086_PI417904088	C074R168	BDKRB2	BDKRB2	-	B2 bradykinin receptor (B2R) (BK-2 receptor)	LOC106611159	-	XM_014211065.1,100,100.000,60,2.54e-24	XM_021585106.1,100,96.667,60,3.84e-21	B2 bradykinin receptor-like (LOC106611159)	CATGTGACTAACGTACTAGATTATACAGTAAACTTTATAAATTAATGCCTACTGAGAGTCACCTGTCCAGGAATGGTATCTGCCATGTACCCCCCTCCCCCTCCATGAACAACCCCAGTTACATTTACACAACATATTTCTCTACAGCTCCAAAATGGACATAACCACCAACTCTACAGACATGACAGGAAGGAACAGTACCAATACCAGCCACTGCCCATTCGCTGAGGGGTGGGACTGGCTCCACACCATGCAACCGGGCTACATCCTGGCCATCAGTGTCCTGGGGATTCTAGGTAACGTCTTTGTCCTGTTGGTCTTCTGCCTGCATAAGAAGGCCTGCACCGTAGCAGAGATCTACCTGAGTAACCTGGCCGCCGCTGACCTGCTCCTGGTCTC…
CUST_6411_PI417904088	C030R027	ALDH3A2	ALDH3A2	ALDH4	Fatty aldehyde dehydrogenase (EC 1.2.1.3) (Aldehyde dehydrogenase 4) (Aldehyde dehydrogenase family 3 member A2) (Microsomal aldehyde dehydrogenase) (msALDH)	LOC106602847	AL3A2	XM_014195780.1,100,100.000,60,2.54e-24	XM_021563268.1,100,95.000,60,1.79e-19	fatty aldehyde dehydrogenase-like (LOC106602847)	TCTTTTTTTTTTTTTTTTTTTTTTTTTTTTTTTTTTTTTTTTTTGAAGGACATAAAAACGGATTTATTACAAATGAATTACAATCAATGCCATGGGAATGCTCTGATGGCAATACAAAAACATTGAAATTATACGCTGTTACTCCTTCATTGTTGCTCAGACATAGTAGTTGTCATACTTTGTTACATCCTGAGCTATTGAATACAAGTTCTGCAGGCAAATATTTTAAGAACTCTGTGGTGAAATCGAAGGTGGAATTCTCAAAAGGTAATTGATTGGTTATTTGGTTTTGTTTCAGGCACATAACAGAACAAACAACAATTGCCCTGGAAAAGCATGGTAAACCACTGACAGGGAATGTTAAAGTTATACTTCAAATAAAATACATCTCCATTGCAA…
CUST_15372_PI417904088	C023R067	THAP4	THAP4	-	THAP domain-containing protein 4	THAP4	-	XM_014189914.1,100,100.000,60,2.54e-24	XM_021589895.1,100,100.000,60,1.77e-24	THAP domain containing 4 (thap4)	ataatattgtcgcagtattatatgcaccatttcactgcttcgcgaaagattggtattttctaacataatgacatactttgAATAAGACAACCTTGCAATGGCGTGCCCTTTTCACCAGTCAGCTGAGCTGAACCCTGCACTGCTGGCATTGGACTGGCTTCTCGGGGTCTGGGAGTCCGATGAGCCAGGAGAGGGCTCCTTCTCCTCCATACCGCCTTTCCGCTACAACGAGAGACTGCACTTCTCCCATGTGGGCCAACCAGTCATCAACTTCATGTTTAATGCATTCCATGCTGAGAATAAGAAACCTATGCACAGGGAGTGTGGCTTCATCAGAATACAACCAGGCGGCAACAGAGTAGCCTTCATTATAGCACAGAACTCAGGCCTGGTGGAGAT…
CUST_25164_PI417904088	C078R167	ITM2A	ITM2A	E25 ITM2	Integral membrane protein 2A (Protein E25)	-	-	-	-	0	aAAAAGGGAATTTTATTCTAACATTCTACTCTTTCTGAATAAACATCGACCCAGCATCTGTTAAGTGCTTGTGTTCTGTAAAACACACACGCAAGCATGTGCACAGTGGTGTAAAGTAACTAAGTAAAAATACTTTGAAGTACTGCTTAAGTAGTTTTTTGGGGGCATCTCAAATCAAATTTTATTAGTCACATGCACCGAATACAACAGGTGTAGGTAGACCTTACAGCGAAATGCTGAATACAACAGGTGTAGGTAGACCTTACAGCGAAATGCTGAATACAACAGGTGTAGTAGACCTTACAGCGAAATGCTGACTACAACAGGTGTAGGTAGACCTTACAGCGAAATGCTGAATACAACAGGTGTAGTAGACCTTACAGCGAAATGCTGACTACA…
CUST_18715_PI417904088	C147R006	SPIN1	SPINW	-	Spindlin-W (chSpin-W)	LOC106599982	-	XM_014191313.1,100,100.000,60,2.54e-24	XM_021588923.1,97,98.276,58,1.07e-21	spindlin-1-like (LOC106599982), transcript variant X3	gggggatcttggtagttgtagttcccGTAGTAAGACTATTTCCTTGTAGCTTTCATGAGGTGGATTCTGCTCAGCAGAGGGAAGTAGATATGAAAATAGTGCCCAGGATTGTGTGAATTTATGGAAATATGTCCAAGAAAAGGGGCAGAAAGCGTAGCAGCGGTGAGCTGAGTGAGAGTTCAGGTTCGTCTCTGTCATCGACCCCGGACCCTAACAACCTGCTGGGCCTGCGGATTGAGCACAACTGGAGGGAGAAGGGCAACCTGACCAAGTGGAAAGGCACAGTGCTGGAGCGCCTCACCGTCAACACCTCCCTCTACATGGTCAAATACGACGGATTCGACTGCGTCTATGGCATTGAGCTGTTCAAGGATGAGCGAGTGGCCAACCTCCAGGTTT…
CUST_38364_PI417904088	C168R150	AGA	AGA	-	N(4)-(beta-N-acetylglucosaminyl)-L-asparaginase (EC 3.5.1.26) (Aspartylglucosaminidase) (AGA) (Glycosylasparaginase) (N4-(N-acetyl-beta-glucosaminyl)-L-asparagine amidase) [Cleaved into: Glycosylasparaginase alpha chain; Glycosylasparaginase beta chain]	AGA	-	XM_014199199.1,100,95.000,60,9.20e-19	XM_021561398.1,100,96.667,60,1.38e-20	aspartylglucosaminidase (aga), transcript variant X2	AAAACAAGGAAGTCGAAAAATGAACGTTCATTCTTAATGAAATTCTTCATGAAAGCTAGGTTTATTTTTAACCAACTAATTTCAAAACGCCTCGTATATTTTCGAAATACTGTGGACCGTTAAAAAAATCACTTGCAATTAACATGTTCTGGAAAAAAAATTGCAGTTGAAACTGAAAGCTAACGTTATTTATTTTGCAAAACTTTTGTCAAAATGCATCTGTGTTTTATATTGATGTTTTTGTTGCCATTTGGTCACGCAACATTGCCTCTTGTTATAAACACATGGCAATTCGAGCATGCTACAGCGGCAGCGTGGACTGCTCTGCAGGCTGGGGGCTCTGTGCTGGATGCCGTGGAGAAGGGCTGTGCCCGCTGCGAGGCTGACCAGTGTGATGGC…
CUST_26800_PI417904088	C030R065	CD22	MAG	-	Myelin-associated glycoprotein (1B236) (Brain neuron cytoplasmic protein 3) (Sialic acid-binding Ig-like lectin 4a) (Siglec-4a)	LOC106578340	-	XM_014157038.1,100,100.000,60,2.54e-24	-	B-cell receptor CD22-like (LOC106578340)	ttgggaaagattcaactatgcaaGTCCAGCACAAAGAGGAGGGGATGCGGATTGAAAGATTAACATGGCCTTTTCTTATTCATTTCATTTGGCTTGGAGTGATGGGAGTTGATGCCTCGTCATGGACTGCTGAAGTGCCCAGCTCAGTATCCGGCATGCAGGGCTCATGTATCGTGATTCCCTGCTCATTCAACTACCCAGAACCTGAGGAGAAGCCCTCCAAATTCACTGGCATCTGGATCAAAGACACCCATGATACTATATACCACCCAGACAGCTCCAACATCATCAAAGACTACAGGGGTCGTACAGAGCTGGTGGGAGATCTCCGGCAGAAGAACTGTTCTCTCAGAATCGACCCCCTCCATCACAGTGACAAAGGACCCTTTCATTTCAGGG…
CUST_40928_PI417904088	C064R008	TSPAN9	TSPAN9	-	Tetraspanin-9 (Tspan-9)	TSN9	TSPAN-9, TSPAN9	NM_001141644.1,100,95.000,60,5.22e-21=XM_014208332.1,100,96.667,60,5.50e-21	XM_021577159.1,100,96.667,60,3.84e-21	Tetraspanin-9 (tsn9)	tcgagagaaaatacttcgcatgtgattcattgacgacagcaggaaagtttaaatatagcctacaaaaataatacaatcggATTTAACTTTTGCGTTATCGCGGATTCTACGCTGGAAAACCGGATAGAGGTCGGTCGCAGTAGTCAGGAGATGGTTGAAATGAGGATGAGCTGAACTCGAGCTGGTGCAGTTACGATAGTCACAGCTTCACCATGGCTCGCGGCTGCCTCTGCTGCGTCAAATACATGCTGTTCCTCTTCAACCTGCTCTTCTGGTTGGGGGGCTGTGGTTTGTTGGGTGTGGGAGTGT*GGTTGTCTGTGTCCCAGGGCAGCTTTGCCACCCTATCACCATCCTTCCCCTCCATCTCTGCTGCCAACCTCATCATCACCCTGGGTGCT…
CUST_20074_PI417904088	C120R025	LLGL2	-	-	-	LOC106589453	-	XM_014179458.1,100,100.000,60,2.54e-24	-	lethal[2] giant larvae protein homolog 2-like (LOC106589453), transcript variant X3	CTTGTGAAAAACATGTATTCATTTTCCAGCAGGACATTATGTAGTGTGAAAGTTATCAAAAAAGTAGGGTTCTCAAACTCCATCATTCACTACAAAAATATATTCTAGAGACCACAGAAATGCTAAAATACCCAGCATTTCAAGAAACAGTACCAAAATATTTTGTTGTAAGATCCGACTATAGCAGCCAACCCCCATTAAAAACACACCTAACCGTTAACAGGCAGAGAATCATATAGTACATATATATTAAACATTTGACTACAATATCTTAAAATTACATTCCTAAATAACATTACTCATTGCTGTGTTCAAAAAAAGGGTTTACATTATAACATTTTAAAAACCAAGCCACCATAGAAAGTTGTAGCGTCATGTGCTACACAGGACAAATACCTA…
CUST_32704_PI417904088	C155R155	TRIM35	TRIM27	RFP RNF76	Zinc finger protein RFP (EC 2.3.2.27) (RING finger protein 76) (RING-type E3 ubiquitin transferase TRIM27) (Ret finger protein) (Tripartite motif-containing protein 27)	LOC106604648	-	XM_014199501.1,100,100.000,60,2.54e-24	-	zinc-binding protein A33-like (LOC106604648)	CAGTGAGCAGACGGCTCGGAATGGCTACTGATGCCAGCGCGCTTGAGGAGCTACATAGCGAGCTCAGCTGTCCCGTATGCCTCGACCTCTTCCGTGAGCCGGTGATCCTCGAGTGCGGACACCACTTCTGCCGTGTGTGCATTACGCAGTGCTGGGAGGCCAAGTCCGACGAGCACCCGACTTGCCCGCAGTGCCGGAAGACATGCCCTCAGAAGCTGCGTCCTAACTCGCTTCTGTGTAACGTCGTGGACAGCGTGAGGAGAGCCCGATCCATGGATTTGAAACCCGGGGACGCGGAGCGCACGCAGGAGGATACAGAAGAACGACAACGGGGGGCCAGTATGCCCAGCTCCGGTTTCAGTTTCACTGGTTCTTCTCAGCGCCACGAGCCCGACCTTT…
CUST_13382_PI417904088	C137R168	GLCM	GBA	GC GLUC	Lysosomal acid glucosylceramidase (Lysosomal acid GCase) (EC 3.2.1.45) (Acid beta-glucosidase) (Alglucerase) (Beta-glucocerebrosidase) (Beta-GC) (Cholesterol glucosyltransferase) (SGTase) (EC 2.4.1.-) (Cholesteryl-beta-glucosidase) (EC 3.2.1.104) (D-glucosyl-N-acylsphingosine glucohydrolase) (Imiglucerase)	GLCM	GLCM	NM_001141421.1,100,100.000,60,5.18e-26=XM_014201735.1,100,98.333,60,1.18e-22	XM_021598278.1,100,100.000,60,1.77e-24	Glucosylceramidase (glcm)	gggggagatcaagttgaggcagcggtatgtgtggactaagagagagagagcactgaggagggtcggccactaggagagctGGTGGACATGATAGAATGCCATTGTCAACAGCACTCATCCCTCTCGCTTTGTTCATTGGAGTAGCAACACGATCCAGAGGCAGTGATGAGTGTGTGGCCCGTAACTTTGGCCATGGCTCGGTGGTGTGTGAGTGTAACTCCACCCACTGTGACAGTATTGGGTCGGACACACTACCTGCACTGGGGCAGTTCCTGTCCTTCACCAGCAGTAAGGCTGGCAGCAGGCTGCAGAGAGGACAGGGACAGGTACAGAACAACAGCACTGGAGCAGTTCTCAGGCTGACTGTGGTTCCCAACCAGAAGTACCAGAGGATCAGAG…
CUST_31744_PI417904088	C077R129	MANBA	MANBA	-	Beta-mannosidase (EC 3.2.1.25) (Lysosomal beta A mannosidase) (Mannanase) (Mannase)	-	-	-	-	0	CACAGGTGTATTTCCGTACAGTAGAGCTGGTCCAGGAGCCAATCGCTGGTTCCCCTGGGCTGAATTTCTACTTCCGGGTCAACAAGAAGCCCATCTTCCTGAAGGGTTCAAACTGGATCCCAGCTCACGCCCTTCAGGACCTGGTCAGCCCTGCTGATGTGAGGAACCTTCTACAGTCGTCCGTGGACGCCAATATGAACGCTCTCAGGGTCTGGGGTGGAGGTGTCTATGAACAGGACCTGTTCTACTCTCTCTGTGACGAGATGGGAATTATGATTTGGCAGGACTTCATGTTTGCCTGTGCCATGTACCCCACTGATCCTGACTTCATAGAGACGGTCAGAGAGGAGGTTGGCCAACAGGTGAGGCGCTTAAAGTCCCACCCGTCGGTCATCGTGT…
CUST_1224_PI417904088	C177R123	CKB	TCK1	-	Creatine kinase, testis isozyme (EC 2.7.3.2)	CKB	KCRT	XM_014190721.1,100,100.000,60,2.54e-24	NM_001124715.1,100,95.000,60,1.56e-21	creatine kinase, brain (ckb), transcript variant X4	cgctcatacccttttgttctgcacagtgaccttgttgatgcgttatataactctatacgagtgtaatcaataggaagaagGATGTGTGTATTCCATTGGCCTGCATCCATACCAAATGCCCAAAGCACAATGGTTCAATGATTAGTTTCAGATAACCTTTCAAATTCTGCTGGGAATAATGCTTGTTGGTCTAGCATACCATAAGAATGTATCAATACGGAAACCATCATAGATTGTCACTGCAATAAGTGACAATCTGGTGACTCCATATGAACTAAAATAGTATAGCCAACCCTTTTTGAGGGGAACTGAGACACTAAGTAGATAGTCCAAATGCATTTTTAAGCATAGCAGGTGGCTTACCCTGTAGAATGTGTTTGTTATTGTTCAGCAATGATA…
CUST_19179_PI417904088	C237R028	SLC7A8	-	-	-	-	-	-	-	0	GGGGGGTGCCATTTGTGATGGAGACATAGTGTGTATGATGTAGTAGCGCTTGAATCTAAAAGATAATACTGTAATGTAATAATGAGTTGAATTATTCATAAATGAAATGTGTGTGCTTTATTGTAAGTGCCTGGGAATCAAGTCTTTTTTTGTGCTAGCCTGGTCCCAGATCTGTTTGTTCTCTTGCCAACTCCATTGCTCATTGTCAAGCCAAACATGGGATGACAATAAGTGAAAAGAAGTTGACATGATAGCACGAACAGACTGGCACTCGGACTACTTTTGTGCCCATTCCCACAAAGAACAATGTAGCGGTATGTGTAGTACCTATAGTGCCTGAAATGCACTATGAGAATGTAAAGCCATAGTTTTGCTGCATATGCTTGTTGGATGTTTTCT…
CUST_14037_PI417904088	C175R001	SLC44A2	SLC44A2	CTL2	Choline transporter-like protein 2 (Solute carrier family 44 member 2)	LOC106601353	-	XM_014193512.1,100,100.000,60,2.54e-24	-	choline transporter-like protein 2 (LOC106601353), transcript variant X4	gggtgtatgtATGTTTACATATGTTTATTTTAGTTTCAGAACTCCACAGGCACTTAAACAGATCCACATACACAACCCATATTTTCCCCTGCTTTCAGCTTCACACCATCTTAATACATTTCTTTACCGCTCATTCCCTGGCAAATACAACAGAGAGCAAGCATTGACATTTAACAGCAGGTTAAAAAAGGGGCTACAGTACTGTATTAATGGATTTGGTAATGACAAAGCGTAGAAAATATTGCAACAAATATAAAGTAAAATGTATGTCTTAGTACTGCATGTATTAAAATAATTGCATAGGTTACATACAAAAGTGCTGCTTTATGTAGATGTATAAAATACTTTACTAAATAGATCAGTTCTGTGCTCACCTTCATGTAACACACTCCAAATAAT…
CUST_19108_PI417904088	C252R119	TGFBI	TGFBI	BIGH3	Transforming growth factor-beta-induced protein ig-h3 (Beta ig-h3) (MP70) (MP78)	TGFBI	BGH3	NM_001140391.1,100,100.000,60,5.18e-26=XM_014213300.1,100,100.000,60,2.54e-24	XM_021583240.1,100,98.333,60,8.25e-23	transforming growth factor beta induced (tgfbi)	ttgGGCCAACAGAATAAAGGGAAAAGGCCAAGATGCAGCACTTAACTTTATTGACTTTGGCGCTCACCTTGATTGCAACGATTTGTTTTGCAAAGTCACCCTATCAATCAGTTCTTCAGCACAGCAGAATAAGAGGCAGACAGCATGGACCCAACGTGTGCGCGATGCAAAAGATACAGGGGACCGACAAGAAATATTTCACCAACTGCAAACAATGGTACCATCGCAAGATCTGCGGCAAGCCAACGGTGATCAGCTATGAGTGTTGCCCCGGTTATGAGAAGCTTCCAGGAGAGAAGGGGTGTCCTGCTGCCTTGCCGTTAGTGAACATCTACAACACGCTGGGTGTGGTTGGAGCCGCCACCACTAAGATGTACTCAGAGAGGGCTCAGCTGAGGG…
CUST_2282_PI417904088	C019R163	PLXNB2	-	-	-	LOC106576598	-	XM_014153843.1,100,100.000,60,2.54e-24	XM_021564156.1,100,98.333,60,8.25e-23	plexin-B2-like (LOC106576598), transcript variant X1	AGTATTAAAATATATTTGAGGAGTGATTCAAAATGATGAAGCAGTTGCATAGCAGATAAAACAAACGAGCTGATGACGACGTGAAAACTATTTGGCAAATGATTTAAGGATGATGTTTGAAATCCATTGAAACGGTTTCAGAAGAATTGACAGAGAAGGCAGTACCTGTCCTGTAGACCAGCTCCACAAGTCATGGTGGTTCACAGCTCAATGATTTACAAAAGTACCATTCAATTATATACATATGTAATGATCATTTTAGCATTTCTCTTTTCAATATCTAGTCTCATGTTTCACACACAGGCAATGGTCTACAATGACAATAAGAGCCATTTTGAAATTAACGGTTTAAAAAAATTATACAGAAAAACAATTATGGCATAACACATACCAGCAAAG…
CUST_23218_PI417904088	C228R161	CASQ2	CASQ2	-	Calsequestrin-2 (Calsequestrin, cardiac muscle isoform)	LOC106575318	-	XM_014151781.1,100,100.000,60,2.54e-24	-	calsequestrin-2-like (LOC106575318), transcript variant X2	agaactagagagagtGAGGAAGAGAGAGAGTGAAAGAATACAACTAGAGCTGGAGACTTTAGGGCGAACAACAATTCTTCTCTTGCTTGTTATTTTCAAAACCTTTTTCTGTTTCTTTTACTGGTGCAAATTGATGGCTAGTACTGGCTACTACCCATTGAAGGCTCAAGGGTTCTAGTTCTGTATAGTTTCCCCTGCTTCTTCCAGTTCCTACTCATTGTCCATTAGTGGGTATTTCCCTCTAAGAAGCATGCAGCTCCTCTGGCTGTCCCTGTTGCCCTGTCTGTACCTGGCCTCCCTGTGCTCTGCAGAGCAGGGACTGGAGTTCCCCAGCTTTGACGGGAAGGACCGCGTTCTGCACATCAACGAACGCAACTACAAGAAGGCTCTGAAGAGGTT…
CUST_709_PI417904088	C105R015	USP11	-	-	-	USP11	-	XM_014134585.1,100,100.000,60,2.54e-24	-	ubiquitin specific peptidase 11 (usp11)	CGGATGACCAAAGACAATACATTTATTACAATAGAAAAATACTGTACAGATGCGCTTTAAAAAATCATTTAAGAGCTCTCTATCCATTTCTCGTCATTAAGAAATTGCACAGAAGAAAATAAAACTAATATCTAATTTTAAAGACGTAGCCATTTATTTGCTTCTACTAAGAGAGTACAAATTATATTTGAATCCGAAAAATATGCATCTGTTTATGTCCTGCACCAGAGAGTCTATCTCAAAATCACCGTTGATAGTGGAAAACTAATCCTAACCAGAAATGAAATATCTCCCCGAGCACCAAGATGCCCAATTTATGTGTGTCTGATAATTCAATGAAAAACAAATAATGGATCGCAAGAGAAAATATACAATGCCACGGCACCTACAAATGTATTC…
CUST_23736_PI417904088	C142R062	G-O1	GNA0	-	Guanine nucleotide-binding protein G(o) subunit alpha	GNAO1	-	XM_014149044.1,62,100.000,37,1.55e-11	XM_021597511.1,58,100.000,35,1.40e-10	guanine nucleotide binding protein [G protein], alpha activating activity polypeptide O (gnao1), transcript variant X2	ggggggtgagtggcaagctaaacgatgcgagcgctcgtagctgttgccgccgccctgtagagtttccccacccgaggaccAAGCACAACGACACTGACAAAGAGACCGTGTGAGCGCAAGATACGAAGACAAGTCCTTTTTTTCAAACAAGTGTCAAACGCTGTCGTGGCGAATTTTTTCATGCTTTAACCAGTCATCGGCAGAGCGCGAGCGAGAGGGAGAACGAGAGCGAGTCAGCCTAGAGACGGATAAGGAAGCAATAGGGGGGAAATAATTGCTCGTATATTTCGGTCCTCGCCAACCGTTACTTTGGATATCAAGAAGATCAGAGGTTGTGTAGCCATGGGATGTACACTGAGCGCCGAGGAGAGAGCGGCTTTGGACAGGAGCAAGGCTATC…
CUST_18636_PI417904088	C165R038	ARPIN	ARPIN	-	Arpin	ARPIN	-	XM_014124137.1,100,100.000,60,2.54e-24	NM_001165128.1,98,98.305,59,2.59e-24	actin-related protein 2/3 complex inhibitor (arpin), transcript variant X2	gggggggacgtagaatcaggaagtcacgggatAGTTTTGCTTCGGGTTTTCGAGTATCAAAACAGTGTGATTGTTGCTTTCTCTAGAGTAAAAAATGAGCCGAATTTATAACAATACGTCCTTGCAGAATAAACCTGTTCATAATGAAAAGATTGAGCACGCGTGGGCACCCTCCTCATATCAGAGTGGTCTAGGTGTCATATTAGAGGGAAAGTTGGTTGATGTCTCACGCCATGTTATCACTGACGTCAACAATCAGAAGGACCGTTTCTATGTCCTATACATCAAACCTAGTCGAATCCACCGAAGGAAATTTGATGCTAAAGGAATGGAAATTGAACCAAACTTCAGTGATACCAAAAAGGTCAACACAGGTTATCTCATGTCATCATTCAAGGT…
CUST_22809_PI417904088	C132R153	GIMAP4	GIMAP7	IAN7	GTPase IMAP family member 7 (Immunity-associated nucleotide 7 protein) (IAN-7)	LOC106610455	GIMA7	XM_014209833.1,100,100.000,60,2.54e-24	-	GTPase IMAP family member 4-like (LOC106610455)	aaagtttatttgaacagagacaatgtacgacaaaacaCAGGACTCAGAAGTGAGAAGTGAAACGTTGCAACAGATTTAGCTAACATCTCATTTAAATTTGCAGTCTTCCTGTGTCTTTAGGACCATTTCCACATTGATAAAAAAGGCAAGACCAACTTTCACTCTCTTTTTCTCTATCAGTTCTCAATATTAGGAAGATGTTCCAAATGTTTTGTTTACTCTGTGTATATAGAGAAAGCTTTCAATATCAAGTAATGAAGTCAAACAACTTGTAGAATGTACAGCACTGTTAGCTACGGACTCTCATTGAGTATTGCATACATTTACTGCAGCTCCCACTGTAATTCCCACTGCTGCACCAACTGATACACCAATTGGGCCTCCGAATGCTCCCAATGA…
CUST_16143_PI417904088	C005R132	TRAM2	TRAM2	KIAA0057	Translocating chain-associated membrane protein 2	TRAM2	-	NM_001140043.1,100,98.333,60,2.41e-24=XM_014204593.1,100,100.000,60,2.54e-24	XM_021600043.1,100,98.333,60,8.25e-23	translocation associated membrane protein 2 (tram2)	aaaagtcGGGAAAAAGTCATTCTGCTGAAATGGCATTCCGGAGGAGAAACAAGAGTTATCCCTTCTTCAGCCAGGAATTCTTAATACAGAATCATGCCGATATCGTCTTTAGTTTGGTCATTTTCATTCTGATTGGATTGATGTTTGAGGCAACAGCAAAAACTGCAATACTGTTTATTCAACCCCAGTACAACATCAGCACCCAGTCACCAGAGGGAGAGGTGACGTTGTACCAGTACGGCTGGCGGGACTGGGCCACCATCCTCTTCTATTTCTTCATCACCATCATCCTCCACGCTGTGGTGCAGGAGTACGTCCTGGATAAAGTGAATAGGCGTCTCCATCTCTCGAAAAGCAAGAACACCAAGTTTAATGAGTCAGGCCAGCTGTGTGTGTTTC…
CUST_16549_PI417904088	C058R120	GLU2B	PRKCSH	-	Glucosidase 2 subunit beta (80K-H protein) (Glucosidase II subunit beta) (Protein kinase C substrate 60.1 kDa protein heavy chain) (PKCSH)	GLU2B	-	NM_001139813.1,100,100.000,60,5.18e-26	XM_021578307.1,100,100.000,60,1.77e-24	Glucosidase 2 subunit beta (glu2b)	CACTGGAAAATGTTCAACTAGCTAGCTAATATTTGAGTGTAAAGAGCAATTTAACTGCTTTGCAGCCTGTAAAGAAAGTAATGTTTACAAACTGTTCCCTCGGACATTGTCATATTATCATTGCTGTAGTTCTTTGGTCTATTTGTGTAGACTCGCGGAAAATCAGAGGAATTTCTTTATCTTATAAGAGGTTTTATAGAGAAAGAAAGTCCTTCCTGTGTATCGATGGGTCCAAAATGATCCCTTTTGACCAGGTGAATGATGATTACTGCGACTGTGTGGATGGATCAGATGAACCAGGCACTGCAGCCTGTCCTAATGGCCGATTCTACTGCACCAACCTCGGCTACCGCTCTCACTACATACCATCTTCACGTGTCAATGATGGCATCTGCGACT…
CUST_32900_PI417904088	C098R114	PIK3R3	PIK3R3	-	Phosphatidylinositol 3-kinase regulatory subunit gamma (PI3-kinase regulatory subunit gamma) (PI3K regulatory subunit gamma) (PtdIns-3-kinase regulatory subunit gamma) (Phosphatidylinositol 3-kinase 55 kDa regulatory subunit gamma) (PI3-kinase subunit p55-gamma) (PtdIns-3-kinase regulatory subunit p55-gamma) (p55PIK)	LOC106584012	-	XM_014168766.1,100,100.000,60,2.54e-24	XM_021599719.1,100,98.333,60,8.25e-23	phosphatidylinositol 3-kinase regulatory subunit gamma (LOC106584012), transcript variant X4	ATAAAAGGTATTATTAAAATGTATAATCTTTTAATTAATTTATAGGAGTCTAAATGGTTCTCGAAAGCCCTCTTTCATACACGCATCCTCTCTCTGTGTCCTTTTCTTCTCTGTAGGAAAGGGGGGAACAACAAGTTGATCAAAATCTACCACCGGGATGGGAAGTATGGTTTCTCCGACCCCCTGACATTTGGTTCTGTGGTGGAGCTGATTAGTCACTACAGACATGAGTCTCTGGCCCAGTACAACACCAAGCTAGACGTCAAACTCATGTACCCCATCTCACGCTACCAGCAGGATCAGCTGGTGAAAGAGGACAACATTGACGCGGTGGGGAAGAAACTCCAGGAATACCACAATCAATACCAGGAGAAGAGCAAGGAGTACGACCGGCTTTAT…
CUST_35884_PI417904088	C165R073	CLML	OBSCN	GM878	Obscurin (EC 2.7.11.1) (Obscurin-RhoGEF) (Obscurin-myosin light chain kinase) (Obscurin-MLCK)	LOC106569945	-	XM_014141723.1,100,100.000,60,2.54e-24	XM_021560545.1,100,95.000,60,1.79e-19	uncharacterized LOC106569945 (LOC106569945), transcript variant X3	GAAAGACTGACATACATTTATTATAGGATTAAAGAGCAACCTTTGTAAAATGTACTCGTACTGTAATACAAAGAGGTAAAATACGAACTGTTTTGTAAAGGAGTCAGTCAGTCAAATCAATGTGTTATTCTCTCCAAACCCTGGAATGCTGGTCTAGCAGAGACCACAGTGGAATAGATGACCTGATGCTGGTCTCCCTGTACCCTCGATCTTTCCCTCCAGTTCTGCCGACCCAGAGATGCATACTGAACCTCAGTGTCTTCCACATGAGAAGGGCTTTCTTCCCCATCACTTTGTGTGATTTCAGACCCTAGATTTGACAAGCACCTAGTCTGGAGTTCAGTTCCTTCCTGCTTGTGTCCTGTCACTGTACTGCATTTCTTTATTCTTTTTCTCAGT…
CUST_3124_PI417904088	C168R018	NUB1	-	-	-	LOC106590377	-	XM_014181350.1,100,100.000,60,2.54e-24	XM_021562583.1,100,98.333,60,8.25e-23	NEDD8 ultimate buster 1-like (LOC106590377), transcript variant X5	ggggtatgcacgcacgtatgtacacagagaagcatataggcaagcagatggacagacggatgcacacgcatattactctgTTAATACAATTTAAGATGTGTATGTGAGAAAGAGGTATTCGGTGTCTATATGCTGCTGATACTTAAGGCTCCAGGATGCCTTTTATACCCAAATCCAAGGAGAGCCCTAATTGAACATGACACTGTTGTCAATAGTGTTTCCAGGCTCTGGGAGCCAAGGGGAGGCCCCTATGGACGTCGACCTGGTGAATGAGGTGCTGAAGGACATCCCTCTACACGAAGAGGACTACCTGGACCTGACCCTGGAGGAGGAGAGCGAGGTCATAGACAAGATGAAGTCCTACCTCTACAAGAACTCTGCCTCCTCCAGCTAAAGTAC…
CUST_16765_PI417904088	C058R135	EVA1B	FAM176B	EVA1B	Protein eva-1 homolog B (Protein FAM176B)	LOC106605123	CA078	XM_014200456.1,100,100.000,60,2.54e-24	XM_021595506.1,100,95.000,60,1.79e-19	protein eva-1 homolog B-like (LOC106605123), transcript variant X4	CTCTTTCTGAGAGGGATTGTATGACAGCTTTTCCTGCTGCTGGCAGAGAGAGTGGAGACCGTGAGGGAGAGGGAAAGTCTGTTATTCAGAGCAAGCTACCACCTCTTCCCCATAGGTTTCTCTACACGCTCCAGGACTGGAGAACAGCAGTAGTCACACACAGGGAATCGGCAAGATTGACAAAGTCAGGATTGCTTGTTGTGTTGATTTTCCCAACCTGGAGGCGAGAAGTGGACTGTTTTGACTGAGGCCAGCATCGAGCCTTACCTTATCTTGACAGGAATTAACTTTCCTAAGAGGACACTTTGACAGTACTACTTACTTGAAACTGACAGAGTAATTCACATCTGACAACTTCTTAGGGGCGGCCAAATGAACTGTTCGGCCTGAGGAGCGAAG…
CUST_12300_PI417904088	C151R086	TSKU	TSKU	LRCC54 TSK	Tsukushin (Tsukushi) (Leucine-rich repeat-containing protein 54) (Z-TSK)	LOC106612955	-	XM_014214674.1,100,100.000,60,2.54e-24	XM_021588259.1,100,100.000,60,1.77e-24	tsukushin-like (LOC106612955), transcript variant X5	TCTCGACAAGTCAGGATAGATAGTTGCAGCACTGACAGTTAATATAAAACCGCAAGAAATCTCTAAATTGCCTGAACCGCACAATGATATTGGATTTACAAAAATGGGAGCGGAGGTTGAGTCAAGATTCCTTGGCGTGGTGAAGTAAACTGGTTTGTCCAGGAGAGCAACCAGTCTAAATTCCTATTTGATGGTAAAGAACATGATGGCGTTCCTCCTGTGTGTTAGTCTGTGGATGCTCCTGGCTGTTCACTGCCAGGCTGGAGCTGTGAAGAACTGTCACCCAAGCTGCCACTGTGAGGTGGAGAGCTTTGGCTTGTTCGACAGCTTCAGCCTGACCAGGGTGGATTGCAGGGGAGTGGGCACCAGCCCCATCCCCATCCCCCTGGACACTGCCCA…
CUST_35803_PI417904088	C106R081	EHBP1L1	-	-	-	LOC110531861	-	-	XM_021615329.1,100,96.721,61,3.84e-21	EH domain-binding protein 1-like protein 1 (LOC110531861)	gtggtttctCCGAGTCATCCAAAATAGCTTTTATTTTCCAAACATTACAAATAGTGCAAATGTACGTAACATTAAAACAAACAAAAAAACTTCCCCAAAAAGCTATTTCAGAAAACTAAAAGCACATTTCTCAAACTCACACAGGGGATAGTAAACATTACCAAAGTAACTAACAACAGAGTGGCAGAGGAAGCACAGACTGGAACACAAGTTCAAACACTTCACCGTCGAAAAAAAATTCACTCAGTCAAATGGCACCCCAAAATAACTCAGGACAGAATCTAGTTTTTACTCTGTTGTGTTGCGCCGCAGAGGTCAAGGGTATATCAACCTCTGGTCCAATCTTGGCCAATAATAGTAATAAGGAAGTGCTGGAGTTTTAATCTTAGAATATTCTTT…
CUST_507_PI417904088	C107R007	CCL20	-	-	-	LOC106570861	-	XM_014143429.1,100,100.000,60,2.54e-24	XM_021622214.1,100,93.333,60,8.31e-18	C-C motif chemokine 20-like (LOC106570861)	GCTTTCGAGCGGCCGCCCGGGCAGGTACGTTTTGACCCCTGACCTTTAACCCCTGACTTATGACCTTAAAGCTATAGGGCACTCTCCTCAGCCCAGGCGTTGCTGAAACCTTAACTTGCCTGGATAGGTATTTCACATATCAGCTAGCTAAACACGTTATAGCTTTGTGATCTAAAGGCGCCATTGAAAATGAGTCCCTGGTCTCAATGTGGCTCCCCTGATTAAATACATGTTAATAAAATAGTTGTTTTATTACTTTTCCAATCCCAGACTGTAGCTTTAAGGTTCCCAGGTGGAATCAAAGCTAATTTACTCTTTCTGGAATGTTATTTATCATTTTGTCACATAAAATATATAAAAGATATAGTACCTCGGCCGCGACCACGCTAAGC
CUST_5223_PI417904088	C230R123	GSTT1	GSTT1	-	Glutathione S-transferase theta-1 (EC 2.5.1.18) (GST class-theta) (GST-CL1)	GSTT1	LOC106585460	XM_014171685.1,100,100.000,60,2.54e-24	XM_021605686.1,100,100.000,60,1.77e-24	glutathione S-transferase theta-1-like (LOC106585460)	tgcaagacatctttctttaatatttttattaactaagaacattttctataaatgtcactttgttaatgtgaagcaagttgggtagataagcagggaaaaaatccactaaaatcatttttttccccttttttagatctacatcattttattaaggcagcaaaaggtgaaaactgtgcaagggatgtgtagactttcactaggcactgtaaatgaaatgggaagagtttgaagaatgttctttcaggttttggacttttgcatatctcataaaatagtactttacattctattgttaattgggcattttctttttagaactaaacctttttggaaaaatgggaagagtttaaagaattttctttcaggttttggactgcagaacctttgcatctctcacca…
CUST_2672_PI417904088	C203R090	IG3BP	LGALS3BP	LGALS3BPA	Galectin-3-binding protein A (Lectin galactoside-binding soluble 3-binding protein A)	-	-	-	-	0	gggggagaaacgaaacGTAGAGAATCCATTTGCAGAAGTGCAGTTTTCATTACATTAGCAACTACTTCCAGCCCTGTTTCTATATAAGCTGTATAATTTCATAAGGGTTGTAAAAGAACCACGACGCACACAGCAAGACACAAGAGTTTTCCAAGCTGGCTGGTGAAAATGCAGAATCGTGGAATCACTCTGTGGCTGCTGTTGCTTCTCCATGTCCCTGGACTAGACTCTGCAACATGGAATCTATTCAGTAAGTCCTCGACAGAGCCCACACAGGAAGGCGCGGTGAGGCTGGTGGGGGGTAAGCATGACTCAGAGGGTCGAGTGGAGGTGTACCACGAGGGGAAATGGGGGACCGTCTGTGACGATGGCTGGGACCTGGCCGAGGCTCAGGTGGTG…
CUST_22150_PI417904088	C087R026	MS4A8	MS4A8	CD20L5 MS4A8A	Membrane-spanning 4-domains subfamily A member 8 (CD20 antigen-like 5) (Membrane-spanning 4-domains subfamily A member 8A)	M4A8A	-	NM_001141595.1,97,100.000,58,6.70e-25=XM_014200675.1,100,100.000,60,2.54e-24	-	Membrane-spanning 4-domains subfamily A member 8A (m4a8a)	agtGGTTGAAAAACGAGTTTTAATGACTCCAACATAAGTGTATGTAAACTTCCGACTTCAACTGTACACACAGTATGCGCCTACAGTAGAAACGAAAACACGATATACGGAAAATAAGGAACTTACTTTGATAGGAATGCACACATGTTTTCCTTACAAATAATAACTTTGGACAACAAGTTAGGCAAAGCGAGCACCAGAATTGTTTTTTTACAATTCTTGCAAGACTGGGCAAATATATGCATACTTGATCTGCGCAAACATGAGTGCAGTGCGGTGGGCTCTCCTCGAAGAGAGAAGTTTATCTGGCTCAGTAAAGCCTCAAACATAAATTGTACGCAACACTGAATGTGAATTAATTAGGAGGCTTAACACACCTCTATTCAAACTGTTGTTAGA…
CUST_10771_PI417904088	C065R048	-	-	-	-	LOC110531667	-	-	XM_021614986.1,100,93.333,60,8.31e-18	uncharacterized LOC110531667 (LOC110531667)	GAGATGCTCTGAGCTTTCCTCCCAGACAAGGCACTACTACTACTATTCCTGTAACAGATTGTGTTTGGTTTACCATTCCACTTGAACACACTGACTCTACATTACCAAGAAAAGAGACACAGCACTGCTCTACTCTGTCCAGTGTCCACGACTGCCATCATCATGTCCAAGCTCATCTGTGTGACTCTCTTACTGGTCTTTCTGGTCTCCATTTGGTGCCACAACACAGCCTCTTCTACCAAATGGTCTGTGAGGGACGTGCGTAAGTGCCGGTGCAAAGTTCTTCCCAATGGGAGAGAGATCTGCCGCAAGCCACTCTTTCCCAAAAGCCCTGAGGAGACAAAGCAACTGATTAAATGCTTTTGCAGGAAATATAACTTGTATAAACTCAGTGCAAAG…
CUST_39196_PI417904088	C085R044	TNNT3	TF	-	Serotransferrin	TRF	TRF1, TF, STF, TF1	NM_001123655.1,95,89.474,57,2.44e-14	NM_001124552.1,100,100.000,60,1.55e-26=XM_021588578.1,100,100.000,60,1.77e-24	transferrin (trf)	TTTTTTTTTTTTTTTTTTTTTTTTTTTTTTTTTTTTTTTTTTTTTTTTTTTTTTTTTTTTTTTTTTTTTTTTTTTTTTTTTTTTTTTTTTTTTTGAAGAGTCACACTTTATTTACAAAAATACTGAGAACCAAACAGTCCAGGGCGAGAAAGCAAGAGGGATAATTCCTACAACTGCAGCTAATGGCTCCGTGCTGTAGACTGAGGCACGTCTTGGATGAATAAGCAAACAGTAAAACTTAGTGGTCTGAGCCATGACTTCAGCGTAAGTGTGTGTTGTTGTTGCTGCATTAGGCCTGTTTCCGGTAGTACGGTGGCAGTCTGGGCTCCAAGCAGCAGAACGGGATCGTTTACTTTCTGCGGACGGTTTTACCCTTCTTAGAGAATTTACTCAGCTCCT…
CUST_21089_PI417904088	C028R167	IGSF8	IGSF8	EWI2 KCT4 PGRL	Immunoglobulin superfamily member 8 (IgSF8) (CD81 partner 3) (Glu-Trp-Ile EWI motif-containing protein 2) (EWI-2) (Keratinocyte-associated transmembrane protein 4) (KCT-4) (Prostaglandin regulatory-like protein) (PGRL) (CD antigen CD316)	IGSF8	-	XM_014133993.1,100,100.000,60,2.54e-24	XM_021567544.1,100,96.667,60,3.84e-21	immunoglobulin superfamily, member 8 (igsf8)	AACCTATTTGTCGATTACCCTTCAGTGAACTTATACGTTGTCGTGACTTCCTACTTCCTATTTCGGGGAGCGTTGTCTAGCCAATCGATTCATGAAGCAACAGGTTACCGTGGCGATGATGACCACGCCCACAAACAAGGCAGAGGACATGCCCACAACCAAGGGGATGAGGAGCAGGTCGGCCGCTCTGGCGTACAGGTAGACTCTAACACCCTCTGATTGGGCCTTGGCCCCGGTGTTGTACCATCCCCCACGGGGGTCTTGTCCCCACACCTCAGCCTGGCAGACAAACAGGCCCTGGTCCTGGTCCTGGGCAGAGAAGATCCTCAGCCTGTAGGTGCCTGGAGACACCCGGTCCATACTGACCTCAGAGCTGTGATTCTTATGTGGCCTGGACAG…
CUST_3408_PI417904088	C081R015	GBA	GBA	GC GLUC	Lysosomal acid glucosylceramidase (Lysosomal acid GCase) (EC 3.2.1.45) (Acid beta-glucosidase) (Alglucerase) (Beta-glucocerebrosidase) (Beta-GC) (Cholesterol glucosyltransferase) (SGTase) (EC 2.4.1.-) (Cholesteryl-beta-glucosidase) (EC 3.2.1.104) (D-glucosyl-N-acylsphingosine glucohydrolase) (Imiglucerase)	GLCM	GLCM	NM_001141421.1,100,98.333,60,2.41e-24=XM_014201735.1,100,100.000,60,2.54e-24	XM_021598278.1,100,98.333,60,8.25e-23	Glucosylceramidase (glcm)	cttatgacatgtcaaagatcctgataaaaactaggtaagaacgaacctctgatgcgcactggtgacagtgaatgttacagTTGCGGATTAAAATGACACTAGCTAGTGGACTAAAGGAGCCTAACGTTACTCCGGATGTATGTAATGGAACTGAGAGTCATGACCAGGGGCTAGTAGGCTACAGCACCTGTCAGCATGCTGCTGTTATTCTCTGCTCTCTCTACAGATATAATGCCATTGTCAACAGCACTCATCCATCTCGCTTTGTTCATTGGAGTAGCAACACGATCCAGAGGCAGTGATGAGTGTGTGGCCCGTAACTTTGGCCATGGCTCGGTGGTGTGTGAGTGTAACTCCACCCACTGTGACAGTATTGGGTCAGACACACTACCTGCACTG…
CUST_19787_PI417904088	C038R110	FADSD6	-	-	-	FADSD6	-	XM_014170213.1,100,100.000,60,2.54e-24	-	delta-6 fatty acyl desaturase (fadsd6), transcript variant X2	gatgaggaaaaatttgaatttaataaattatagaaagggaaagggaaggtaaggctgtaaggtaacaaaatgtggaacaaGTCAAGGGGTCTGAATACACTGTAATATTTCTGTATTTCATTTTCTATAAATTAGCAAACATTTCTAAAAACATGTTTTCAATATCTCATTATGGGGTATTGTTTGTAGATGGGTGAGAAAAAAATATATATGAATACATTTTGAATTCAGGCTGTAACAGAACAGAATGTGGAATAAGTCAAGGGGTATGAATACTTTCTGAAGGCACAGTATTATACAGTCAATGAACTAAGCAGACCAGAGCCAGCTGCTATAGCATTGGTGCCTATCAGCAGGAAGGCGGGGCTAGTTACCCCTTTATGGTTATGAATGTGTCTC…
CUST_8203_PI417904088	C012R041	S10A5	S100A4	CAPL MTS1	Protein S100-A4 (Calvasculin) (Metastasin) (Placental calcium-binding protein) (Protein Mts1) (S100 calcium-binding protein A4)	S10A5	-	NM_001141600.1,100,100.000,60,5.18e-26=XM_014151011.1,100,100.000,60,2.54e-24	XM_021598332.1,100,100.000,60,1.77e-24	S100-A5 (s10a5)	ggggaaacaagcaaatacctgccaaatacaattaaggaataagcttctctctttcacaccctcaaaacaagatagaacatAATCTTGACCTTTAAAACATGAATTCATGCAAATGATAGCGTTGGCACATGACCATTTGAGATCAAGTCTGATGGAGCAGGTTGGGTGGAGCTGACATCATTTTCAGGGCATCAATGGCTGCTTGTGGGCTGATCATGTGTCTGCTCTGCTTGAGGGGGTGTTTTTCACTTTAAGAGGAAGCTTCTCTTCTCTCTGTCTCACATCAGTCTCACACCAGGACCCAGCCTGACAGCTACACATATCATAGATCCTATCTTCTGCTCTGAGGTACAGTATGTCTCGTCTGGAGAAGGCCATTGTATCCATGGTGGAGGTGTT…
CUST_19917_PI417904088	C248R073	TRIM39	TRIM39	RNF23 TFP	E3 ubiquitin-protein ligase TRIM39 (EC 2.3.2.27) (RING finger protein 23) (RING-type E3 ubiquitin transferase TRIM39) (Testis-abundant finger protein) (Tripartite motif-containing protein 39)	TRI39	-	NM_001141759.1,100,100.000,60,5.18e-26=XM_014156396.1,100,100.000,60,2.54e-24	XM_021614714.1,100,95.000,60,1.79e-19	Tripartite motif-containing protein 39 (tri39)	GGGGGGCAGATGAACAGCCAGACCCTTTGGTATAGTCTGCTTTCCTTACACTGGGTGATTACACTTCACTGTTCTCCACTGTCGACAGCAAAAAATTCAAGAATTAAGTTATGGCGTCTCTCAGCATGACAGAAGACCAGCTGCGCTGTTCCATCTGCCTGGATCTCTTCGTCCACCCTGTCTCCACTCCATGTGGACACAACTTCTGCAAATCTTGTATCTCTGACTACTGGGATATCAGGGAAGCCATCTGCCCTCTGTGTAAGGAGACGTTCAAGAAACGTCCCGACCTCCACGTCAACACGTTCATTAACGAGATAATCAACCAGTTCAAATCGGCACAGGAGGACATTTCTCCACACACCATTTTGCCATTGAGAGAGCCAGAACAGGGGGACA…
CUST_7288_PI417904088	C112R167	ARPIN	ARPIN	-	Arpin	ARPIN	-	XM_014124137.1,100,100.000,60,2.54e-24	NM_001165128.1,100,98.333,60,7.21e-25	actin-related protein 2/3 complex inhibitor (arpin), transcript variant X2	gggggggacgtagaatcaggaagtcacgggatAGTTTTGCTTCGGGTTTTCGAGTATCAAAACAGTGTGATTGTTGCTTTCTCTAGAGTAAAAAATGAGCCGAATTTATAACAATACGTCCTTGCAGAATAAACCTGTTCATAATGAAAAGATTGAGCACGCGTGGGCACCCTCCTCATATCAGAGTGGTCTAGGTGTCATATTAGAGGGAAAGTTGGTTGATGTCTCACGCCATGTTATCACTGACGTCAACAATCAGAAGGACCGTTTCTATGTCCTATACATCAAACCTAGTCGAATCCACCGAAGGAAATTTGATGCTAAAGGAATGGAAATTGAACCAAACTTCAGTGATACCAAAAAGGTCAACACAGGTTATCTCATGTCATCATTCAAGGT…
CUST_28603_PI417904088	C038R034	ARHGAP39	-	-	Neutral protease 2 homolog AFUB_070680 (EC 3.4.24.39) (Deuterolysin AFUB_070680)	LOC106582900	-	XM_014166494.1,100,100.000,60,2.54e-24	XM_021609532.1,100,98.333,60,8.25e-23	rho GTPase-activating protein 39-like (LOC106582900), transcript variant X3	TTGGGCTACAGGCTATGAAGCGCTGCTCTGAGGCCAAGCGGGCCGCGGGAACGGGAGAGAGGGACAGGGAGCCTGGAACAGGTAGACTAGGGAGTACAGGGAGCCGTACAGGGAGCCAGGGACACCGCACCCCTCTTCCAGAGCACCATGGCGTGGGGAGTACAGACAGCCAGGGACACCGCACCCCTCTTCCAGAGCACCATGGCGTGGGGAGTACAGACTGCCAGGGACACCGTACCCCTCTTCCAGAGCACCATGGCGTGGGGAGTACAGACAGCCAGGGGCGCCTCACCCCTCGTCCAGAGCACCATGGAGCAGGGAGCCTGGGGAGTACAGGCAGCCAGAGACACCGCACCCCTCGTCCAGAGCACCATGGAGCAGGGAGCCTGGGGAGTACAG…
CUST_8736_PI417904088	C083R069	PAFAH1B3	PAFAH1B3	PAFAHG	Platelet-activating factor acetylhydrolase IB subunit gamma (EC 3.1.1.47) (PAF acetylhydrolase 29 kDa subunit) (PAF-AH 29 kDa subunit) (PAF-AH subunit gamma) (PAFAH subunit gamma)	LOC106578751	PA1B3	XM_014157950.1,100,100.000,60,2.54e-24	XM_021591157.1,97,100.000,58,2.29e-23	platelet-activating factor acetylhydrolase IB subunit gamma-like (LOC106578751), transcript variant X9	AAGCTTTCATCGGTTTTAATGCATTGCATTTTGACATCACATATTCAGTTTTTCCACAATCAACATTCAAGATAGAGGCAGTTAGGACTATATATGTGGTATATACAAACAGTCAAAGGGAGTCTTGGGTCTCGTGGGGTGACTGCCTTTGAATAAAGAGTGCAAGACAAGTATAAGCTAGGTACACCACATCCATACACACTGACTCAGTATCATATCCAAGCCAAATACCCACCAGTCTCAGCGCTACTTTGAAATGCCCTCATCGTTCACTCCAAATACACCATAACCTTCCCCTTCATTCTCCATATTTCTACAGCCAAAATAAGACATATTCAGCCTAAATCTTCACAAGTAACAAAAAGCAACGGTGGTAAACAGATACCGGAAACAAGTAAT…
CUST_8822_PI417904088	C159R004	TOPORSA	-	-	-	LOC100194720	-	XM_014194811.1,100,100.000,60,2.54e-24	XM_021573154.1,98,100.000,59,6.38e-24	uncharacterized LOC100194720 (LOC100194720)	gggggaaacctaaattggcaagattggcctgcagtcaggaattgaaacctaagcgctaggtttcctaagcataGGGAGTATTCCTGCATTTGTCTGGCAGCAGCAGCTCATTTCAGCAGAGGTGTATTTAACAGCAGTTTCGTTACTATGGATGTTAACCCTGACTCCCCATACTACATCAACTTGCTTGACAGCAAGACTCACCCTGAAGATCACAGAGAATATGTGATGTTTCATGGCTGCTCAAAACAGGGCGCAGAGTTGATTAAAAGGGAAGGTTTCAAACCATCAAGAGCAGATATCAGCATGCTTGGTGCTGGTGTTTATGTTAGTCGGGACACCCGAAAAGCCTGTAAATACCCTCTTGATGTTCCTGACTCTGAGAAAAGAGTACTAAAA…
CUST_24053_PI417904088	C143R019	AIFM2	AIFM2	-	Apoptosis-inducing factor 2 (EC 1.-.-.-)	-	-	-	-	0	ccGATGTATTTTTTATTAAGGCATAcgTTAACATTCATTGGCAAAAAAA**TGGACATTGTACAAAGTTTGCATCCCCTTGCGTAAAAATATTTTACAAATATATGGTCCCATATCAATAGTCATGTCAAAATGCCAAAACTTCagcAAGCTGTCCCCCCAGTAAGgcacTCTCTGTCAAGGGTGTGCCGGCCcaCTCATGTCTTCCCCCCCCAATGTTCTGTCTGGCAcaCGTTAAGGAGCTTTCTGACCCATTTCCTTCCAGCTTTTCCAcaacaatAGGTTCTTGCTCTTGCCCTGAGTTACAAGGGAACGGGGAAgcCCcccCCCATTGAACTGGCCCCCcccaTCGTTATGGCCCATGGCTAACAACATGGtcccCCCCCcTGGGGGAAAAAAT…
CUST_9680_PI417904088	C031R005	CTTN	-	-	-	LOC106561907	-	XM_014126246.1,100,100.000,60,2.54e-24	XM_021606811.1,100,96.667,60,3.84e-21	src substrate cortactin-like (LOC106561907), transcript variant X3	ACTATCCATACATTGTTTATTTAAACAATTGACTTACAAAAAAAGAACAAGCAGATAATGTGGTGACTTGAGCAAGTAGAAGTACAGATAAAAATAAACATATAAAAAAGGTCACTTTTTATTATAAAACCTCAAATAATTGATTTGATGAGATCACATCCCCACACACCTACTGAAGTTACTACTGCATTAGATCGCCGTGACATTGGGGTCAGATTGTCATCGGTTAAAATAATCACTCTGCGTTTTAGAAACAACCACAGTCAAAATCCCCTTATAACCCAACATTGTTTCAGAGCATTATTTTAGTACTTATAGCCCCCTATAAATAAATATCACTCTTCAGTCACTCAGTCAACAGTACACATCTTGGTCATGATAAGGATGTCAATGTGGCCC…
CUST_2008_PI417904088	C061R022	PLXND1	PLXND1	KIAA0620	Plexin-D1	LOC106571875	-	XM_014145393.1,100,100.000,60,2.54e-24	XM_021615522.1,97,100.000,58,2.29e-23	plexin-D1-like (LOC106571875)	catagctgtttctttcatatgggagcatttacagtactattctttcagaaaaagtccagatgcccattgggttgttgggtGGTATGCACAACCAATCAAGACAGCACAAACAAAACACTACAGTACATTGCTGCCCTGTGGTTTACAAATGTCACTTTGCTGAACTTTTCTCAGTTTACACAGGACTAGGGCCTAGATTCAGTCAGATCAAGCATTAACTGGCGATAACAGACACCCGCATAGCAGATGTTTTGGCAATGTCAGAGGTGAAACTGCTAGAGCTGTCAAATCGGTGAGCAGCTGCTCTTGCAATTGTTGTCATGAAAGCCAAAGCGTTAGAAGTTAAGAATGAGAAAATGTAGGCTATATAGAAATAATTTAGCTCAAATTTATAACTCA…
CUST_15732_PI417904088	C095R124	LGALS8	LGALS8	-	Galectin-8 (Gal-8) (LGALS-8)	LGALS8	LEG8	NM_001140306.1,100,100.000,60,5.18e-26=XM_014204706.1,100,100.000,60,2.54e-24	XM_021600138.1,98,100.000,59,6.38e-24	galectin 8 (lgals8)	ttggGTTGGCATTCTTGGGCCCATTTGAACGCTTTCTGCTGAATCACTCAACAATGTCGATCACGAACCCGAAACAAACTGTTCTGAATCCGACCATTCCCTTTGCTGGGACGATCCTGGGAGGTTTACAGCCTGGGGAGATGGTGCTCATTCAAGGCACTGTTCCCAGTGATTGTGAGAGGTTTCAGGTGGACTTCACCTGTGGGAACAGCACAAAGCCTAGAGCGGACATAGCCTTCCACTTCAACCCTCGCTTTAAGAGATCTCCCTGCATCGTGTGCAACACACTGGAGAGAGAGAGCTGGGGCAAGGAGGAGATCCTATATAAGAACGCTTTCACACTGGGGTCAACCTTTGAGATGATCGTCCTGGTGCAGAAAGATGAGTTTAAGGTGGCAG…
CUST_41572_PI417904088	C204R014	SCYB7	CXCL11.1	CXCL11AA	C-X-C motif chemokine 11-1	SCYB7	-	NM_001141223.1,100,95.000,60,5.22e-21=XM_014143455.1,100,95.000,60,2.56e-19	NM_001124316.1,100,98.333,60,7.21e-25=XM_021622222.1,100,100.000,60,1.77e-24	Platelet basic protein (scyb7)	CAACTTCCATCACTTGACTGAGCTGTCCATCCAGACTCTAAAAGAAACTGAAGAAGCAGTATCCATGACCAACACGATGACATCAACGGTCCTCATCAGCTTCCTGGCCTGTCTGCTCCTGGCCAATGTTGAAGGCCAGGTGGGTCATTCTAAAGCTCGGTGCCAGTGTCAGAATGGACTGGTGAACCGTGTTAAACCTCTTCACATTGAGAAGCTCGAGGTGTACACCTCCAGCCACTCCTGCAGGAACATGGAGATCATTGTCACTCTGAAGAATGGAGAAGGGAAAAAGTGTCTGAATCCAGAGGCTCCATTTGCCAAGAAAACCATTGAGAAAATAATGAAAAAACAAAGGAGTGTGCAGTAAATCTGTGAACTAATGACACCAATCCCACTGAG…
CUST_20581_PI417904088	C193R045	ELOVL6	ELOVL6	-	Elongation of very long chain fatty acids protein 6 (EC 2.3.1.199) (3-keto acyl-CoA synthase elovl6) (ELOVL fatty acid elongase 6) (ELOVL FA elongase 6) (Very long chain 3-ketoacyl-CoA synthase 6) (Very long chain 3-oxoacyl-CoA synthase 6)	ELOVL6	-	XM_014211954.1,100,98.333,60,1.18e-22	XM_021584104.1,100,98.333,60,8.25e-23	ELOVL fatty acid elongase 6 (elovl6)	TCAGCAAGTTTTGGGCCTACGCCTTTGTGCTCAGTAAAGCACCAGAATTGGGTGACACCCTGTTCATCGTGCTGCGGAAGCAGAAGCTCATCTTCCTCCACTGGTACCATCACATCACTGTTCTGCTCTACTCCTGGTACTCCTACAAGGACATGGTGGCTGGCGGCGGCTGGTTCATGACCATGAACTACCTGGTCCACTCCGTCATGTACTCTTACTACGCCCTGAGGGCGGCCGGGTTCAAGGTCTCAAGGAAATTCGCCATGTTCATCACACTCACGCAGATCACCCAGATGCTGGTGGGCTGCGTGGTGAACTACCTGGTGTACTCGTGGATGCAGCAGGGTCAGGAGTGCCCGTCTCACGTGCAGAACATTGTGTGGTCCTCGCTTATGTACC…
CUST_13025_PI417904088	C162R145	MAN2B1	MAN2B1	MANB	Lysosomal alpha-mannosidase (Laman) (EC 3.2.1.24) (Lysosomal acid alpha-mannosidase) (Mannosidase alpha class 2B member 1) (Mannosidase alpha-B) [Cleaved into: Lysosomal alpha-mannosidase A peptide; Lysosomal alpha-mannosidase B peptide; Lysosomal alpha-mannosidase C peptide; Lysosomal alpha-mannosidase D peptide; Lysosomal alpha-mannosidase E peptide]	MAN2B1	MAN2B1	XM_014185044.1,100,100.000,60,2.54e-24	XM_021556408.1,100,98.333,60,8.25e-23	lysosomal alpha-mannosidase (LOC101448032)	ggggggttttccaagatggcgactccagtgtctgcaccgtttgtgttcctcctgttattatttCAAAGCGGCGTTTGGGGCTTTCCCGTCCGTCAAACACCCCAAGAAAGTCCTACATGTGGATACAAGTCATGTCATGCTACCAAGCCTGGGATGTTGAACGTCCACCTGGTCCCCCACACCCACGACGACGTCGGCTGGCTCAAGACCGTGGACCAATACTTTTATGGAGACCGTAATGAAATCCAGCACGCGGGGGTGCAGTACATTCTGGACTCTGTGGTGGACCAGCTGCTGAAGAACCCTGACAGACGCTTCATCTACGTTGAGACAGCCTTCTTCTACCGCTGGTGGAAACAACAGACTGATGACATGCAGAACACTGTCAAACAGCTAGTC…
8_3_4_14	C024R046	MAP3K22	-	-	Transposable element Tcb1 transposase (Transposable element Barney transposase)	LOC106589969	-	XR_001324976.1,100,100.000,60,2.54e-24	XM_021594270.1,100,95.000,60,1.79e-19	uncharacterized LOC106589969 (LOC106589969), transcript variant X2	cagcgatgTTAAAGCTTGGTCGCAAATGGGTCTTCCAAATGGACAATGACCCCAAGCATACGTCCAAAGTTGTGGCAAAATGGCTTAAGGACAACAAAGTCAAGGTATTGGAGTGGCCATCACAAAGCCCTGCCATCAATCCTATAGAAAATTTGTAGGCAGAACTGAAAGTGTGTGAGAGCAAGGAGGCCTACAAACCTGAATCAGTTACAAAATTCACCCAACTTATTGTGGGAAGCTTGTGGAAGGCTACCTGAAACGTTTGACCCAAGTTAAACAATACAAATAAAAAATACTAATTGAGTGTATGTAAACTTCTGACCCACTGGGAATATGATGAAAGAAATAAAAGCTGAAATAAATAATTCTCTCTACTATTATTCTGACATTTCACATTCT…
CUST_9619_PI417904088	C223R038	FADSD5	FADS2	DELTA6FAD	Fatty acid desaturase 2 (EC 1.14.19.3) (Acyl-CoA 6-desaturase) (Delta(6) fatty acid desaturase) (Fads2 (delta6)) (Delta-6 fatty acid desaturase)	D6FADC	D6FAD_C	NM_001171780.1,100,100.000,60,5.18e-26=XM_014170394.1,100,100.000,60,2.54e-24	NM_001124287.1,100,95.000,60,1.56e-21=XM_021598608.1,100,100.000,60,1.77e-24	delta-6 fatty acyl desaturase-like (d6fadc)	ggcacatctggatatgttggtattcttcattcgatattttcagcaaattaattgaacaacatattttgttgtacaacgctGTCTGGAAAACATCTCCCTTCCCTCAGTCAAAAGAATCGCAGTGTGCTTCAGTTGGACAGACTGGACAGAGCGTAGCTGACACAGCGACGGTGTGAGTGGAGCAGAGAGAACCGAGGATGGGGGGCGGAGGCCAGCAGACGGAGTCAAGCGAGCCGGCCAAGGGTGACGGGCTTGAGCCCGATGGAGGGCAAGGTGGCAGTGCAGTCTACACCTGGGAAGAGGTCCAGAGGCACTCCCACAGAAGCGACCAGTGGTTGGTCATCGACAGGAAGGTCTATAATATTACCCAGTGGGCAAAGAGACACCCGGGTGGCATCA…
9_1_15_9	C125R166	LICH	LIPA	-	Lysosomal acid lipase/cholesteryl ester hydrolase (Acid cholesteryl ester hydrolase) (LAL) (EC 3.1.1.13) (Cholesteryl esterase) (Lipase A) (Sterol esterase)	LICH	-	NM_001139859.1,100,100.000,60,5.18e-26=XM_014178868.1,100,100.000,60,2.54e-24	XM_021575755.1,100,96.667,60,3.84e-21	Lysosomal acid lipase/cholesteryl ester hydrolase (lich)	ttggacaaaagcagtagggagcctctgacgttttatcacgctgcagctcctgtgacttcctcttcatttggccaacaaagAATACAGCATTATTATTCTACACAACAGAAGTTGTCCGGACTGAAGATGGTGTGGGCACTACTTTTAATAGCCTTCCTGACCACTGGGGCGGTCCAGTGTCAGAGATCCTTGCTGAAAGACAAAAAAGGACTGGACCCAGAGGTCAACATGAATATTAGTGAGATCATCAGGCGTTGGGGCTACCCGGCAGAGGAGCATGACGTAGTCACAGAAGACCTCTACATCCTCAGTGTCAACAGGATCCCGCATGGCCTGAAGAACAGTAAAGATCCCAAGCCTGCAGTGTTCCTCCAGCACGGTCTCCTAGCTGCGGGGAGT…
CUST_13832_PI417904088	C133R059	EHD4	EHD4	HCA10 HCA11 PAST4	EH domain-containing protein 4 (Hepatocellular carcinoma-associated protein 10/11) (PAST homolog 4)	EHD4	-	NM_001139772.1,100,100.000,60,5.18e-26=XM_014211048.1,100,100.000,60,2.54e-24	XM_021585192.1,100,96.667,60,3.84e-21	EH domain-containing protein 4 (ehd4)	ttggcgcgaaccactgcaacgctgtgaactactgcgacgcacagaggagctactgtagagagcagccatcaagcagtgttGGGAAAACAACCGTAGATTCTAGATGCCACGTTTTTCAGTTGCCAAAGAACATATTTGATTCAAAGTAACAGTGCCCATTTTTGTAATATATTCGGATACAAAGTAGCCTCGTTGCGCAAACTTTGAAAGCTGTGGAAAATAAGGAAGTAAAACGTTAGTTCTTGATTTGGGAACTGAGAAGAGGAGCATCATCATGTTCAGTTGGGTGAATAAGGAACAAGGAGGCAGAAACAAGGACGGCGAGATGTACCAAACTGTGACGGAGGGTCTTCAACAGCTTTACTCAAAAAAATTATTTCCATTGGAAGAAACCTATCT…
CUST_4218_PI417904088	C152R030	-	-	-	-	LOC106572774	-	XR_001321189.1,100,100.000,60,2.54e-24	-	uncharacterized LOC106572774 (LOC106572774)	gggggtattctaggagatgaatcagtggagtggagcgttaacatgttgagctcagaaagtccctggatgtgtcccaaattGGACCAGAGCCCTGGTCGAAAGGAATGCACTAAATAGGGGATAGGGTGCAATTTGGGACACAGACCCAATGGTAAGCCAGATAGTCCCAATCAGGTCTGGGGGGGAGAGAGGACATGAGTAAGAAGATAGACTATAGTATGTAAATAAAATGAACTTGTGTAGTTCAATAAGACTATTGAATGGAGTCAGATAATGCCTGGAAAATATTGAATGGAATAATGCCCTGGAAAATATTGAATGGAATAATGCCTTGGAAAATATTGAATGGAATAATGCCTTGGAAAATATTGAATGGAATAATGCCTTGGAAAATATTGA…
CUST_4484_PI417904088	C018R107	LICH	LIPA	-	Lysosomal acid lipase/cholesteryl ester hydrolase (Acid cholesteryl ester hydrolase) (LAL) (EC 3.1.1.13) (Cholesteryl esterase) (Lipase A) (Sterol esterase)	LICH	-	NM_001139859.1,100,100.000,60,5.18e-26=XM_014178868.1,100,100.000,60,2.54e-24	-	Lysosomal acid lipase/cholesteryl ester hydrolase (lich)	ttggacaaaagcagtagggagcctctgacgttttatcacgctgcagctcctgtgacttcctcttcatttggccaacaaagAATACAGCATTATTATTCTACACAACAGAAGTTGTCCGGACTGAAGATGGTGTGGGCACTACTTTTAATAGCCTTCCTGACCACTGGGGCGGTCCAGTGTCAGAGATCCTTGCTGAAAGACAAAAAAGGACTGGACCCAGAGGTCAACATGAATATTAGTGAGATCATCAGGCGTTGGGGCTACCCGGCAGAGGAGCATGACGTAGTCACAGAAGACCTCTACATCCTCAGTGTCAACAGGATCCCGCATGGCCTGAAGAACAGTAAAGATCCCAAGCCTGCAGTGTTCCTCCAGCACGGTCTCCTAGCTGCGGGGAGT…
CUST_6102_PI417904088	C057R080	GRAMD2B	GRAMD3	GRAMD2B	GRAM domain-containing protein 2B (GRAM domain-containing protein 3)	LOC106613502	-	XM_014215802.1,100,100.000,60,2.54e-24	XM_021603304.1,100,100.000,60,1.77e-24	GRAM domain-containing protein 3-like (LOC106613502), transcript variant X2	aaggatgtggccatactgagttgaactagttcagaagtcattcagcacccatcattatgcagtagcaggttaagacttgaAGGCCTTTGTTCAACAGTTTTCGGGTTGGGTTTTGTTTTGACTGGCTGCAAATTATGGATTGAAGTCAGTGCTGCTACAGTGTGTTTTTATTCAGATAAGGAGGTCTTGCTATGAACAGGTATGAGTTTTCGGTCATCAAGGAGACAGCATCTGAACGGCTACCCAGTGGAGAGTGGGGGACTATCGGTGCAGAAGGAGAGCAAGAAGGTGAAGGCCAGGAAAGCCCTCAGTCTGGAGGAGGCCCAACTGGAGCTCCAGCAGAACAGAAACCTCACCAGACAAGCCCCCGTCAGGTCTCAGACGTTCGACGTGGATAGA…
CUST_31039_PI417904088	C143R029	ABCB6	ABCB6	-	ATP-binding cassette sub-family B member 6, mitochondrial	-	-	-	-	0	TCATCTCCATCATCTACTTCATCACCTACTTCAACGCCTGGTTCGAACTCATCGTATACGTCTGTATGTGCCTCTACCTCACCCTTACCATCATCATCACGGAATGGAGGACTAAGTACAGGCGAGACATGAACACCCAGGACAACAACGCCAAGTCCAAGGCAGTGGACTCCCTGCTCAACTTTGAGACGGTGAAGTACTACAACGCAGAGAATTACGAGGTGAACCGTTTTGAGGACGCCATTCTGAAGTAATCAGATTTCAGAATGGAAGACCCAAGCCTCTCTGGCCTTCCTGAACCAGACCCAGAACCTGATTGTTGGCTCAGGCCTACTGGCAGGCTCACTGCTCTGTGCCTACTTTTTCCAGGAGGGCAAGTTTAAGGTACTGAGCTCAGAA…
CUST_27345_PI417904088	C159R075	APP	APP	-	Amyloid-beta A4 protein (ABPP) (APP) (Alzheimer disease amyloid A4 protein homolog) (Amyloid precursor protein) (Amyloid-beta precursor protein) [Cleaved into: Amyloid-beta protein (A-beta) (APP-beta)]	APP	-	XM_014151321.1,100,100.000,60,2.54e-24	-	amyloid beta [A4] precursor protein (app), transcript variant X4	agacGAGCTCTGAATACATACTGACGGAACATAGAATAATACACCGTACATAGGACGCGTTGTGACAATAATACGGCATGGGGGACCGTATGGCTTTGATGCTGCTGGTTGTTGCGACCACGGCGTTAGCAGTTGAGGTGCCGACAGATGGTGGGATGGGCCTGCTGGCGGAGCCCCAGGTGGCCATGTTCTGTGGGAAGCTCAACATGCATGTGGATGTCCAGAGCGGCAAATGGGAGTCTGACCCCTCCGGCACCAAGAGCTGTATCGGCACCAAGGAGGGCATCCTGCAGTACTGTCAGGAGGTATACCCTGAGCTGCAGATCACCAACGTGGTGGAGGCCAACCAGCCAGTCAGCGTCCAGAACTGGTGCAAGAAGGGCCGCAAGCAGTGCCGCA…
CUST_4653_PI417904088	C233R116	TNNT3	TF	-	Serotransferrin	TNNT3	LOC100194658	NM_001139742.1,100,96.667,60,1.12e-22=XM_014124073.1,100,96.667,60,5.50e-21	XM_021598870.1,100,100.000,60,1.77e-24	fast myotomal muscle troponin-T-1 (LOC100194658)	TTTTTTTTTTTTTTTTTTTTTTTTTTTTTTTTTTTTTTTTTTTTTTTTTTTTTTTTTTTTTTTTTTTTTTTTTTTTTTTTTTTTTTTTTTTTTTGAAGAGTCACACTTTATTTACAAAAATACTGAGAACCAAACAGTCCAGGGCGAGAAAGCAAGAGGGATAATTCCTACAACTGCAGCTAATGGCTCCGTGCTGTAGACTGAGGCACGTCTTGGATGAATAAGCAAACAGTAAAACTTAGTGGTCTGAGCCATGACTTCAGCGTAAGTGTGTGTTGTTGTTGCTGCATTAGGCCTGTTTCCGGTAGTACGGTGGCAGTCTGGGCTCCAAGCAGCAGAACGGGATCGTTTACTTTCTGCGGACGGTTTTACCCTTCTTAGAGAATTTACTCAGCTCCT…
CUST_8810_PI417904088	C182R013	-	-	-	-	LOC100194722	-	XM_014197070.1,100,98.333,60,1.18e-22	-	uncharacterized LOC100194722 (LOC100194722)	ggggggtcataCAGGTCTCTTAGACGTGAGGAGAGGAAGGAGAGCAGCACCACAACACCAGCAAACCGGTACCACCATGGTTCGAGGAACGTTGAACACTATGGCAGATCTAAGACGTTCTGGGTTTGGTCGTCACTTGCCCAGGCATGGACTCAAGCTCCTGTTCTGGTTCGCCAAGAATTACATCAAATTTGATTACATGGGTGAAATGGTTGCAAGATACAACCCCAACGAGGGGGGCTTTGATTTCCATCCCTTCCAGAACAGACCGGAGTGGGACTGCAGCTATGCGACCACACATATATCTGTCATTTCCTGCAATTTTCTGCTCCCAGATAACGTCCACCCATACTATATAGTGGGCAACCTGAATCCAGAAGAATCCAATTGCCTTCCTCA…
CUST_35985_PI417904088	C209R028	CDH11	CDH11	-	Cadherin-11 (OSF-4) (Osteoblast cadherin) (OB-cadherin)	LOC106587288	-	XM_014175532.1,100,100.000,60,2.54e-24	XM_021607096.1,100,98.333,60,8.25e-23	cadherin-11-like (LOC106587288), transcript variant X3	ATAAAAAGCATTTATTTCAAAGTTTTTCGCTTCTTAGATAGAAGCACATAATAAAGCAACAGTACAATGTTCATAAAATATAAGTGTGATGCCGTAACATTTTTCTTACATGTTGAAATACTGATATCTGCATGTGTACTAAAATAAGAACTTTTAAAATTGTACAAATAGGTACCATAAATTCGACATAGAAATTAGGCGTCATTCACTACGACAGGACAGATTGCTATTTTCTCAACAAGGGAGAAAAACATACGCCCCCAAAAAATATTTAAAAAATGAAGAGAACAAAAAAAATCATAATAATCATAATAACATCATAATAAAAAATGAGATTTACAAGAACCAATAGGCGCACGTTTGATCCTCAAGAGACATATTTGCACATTGTACTGTACA…
CUST_18010_PI417904088	C082R128	CIDEB	CIDEB	-	Cell death activator CIDE-B (Cell death-inducing DFFA-like effector B)	CIDEB	-	NM_001141656.1,100,100.000,60,5.18e-26=XM_014206954.1,100,100.000,60,2.54e-24	-	cell death-inducing DFFA-like effector b (cideb)	ggggtgtggctgctcagccattctatcactcttactatctctcagggaaatatttgtagaccaaatcaatcttccatagtGCAGTACAAATGTATACGTTTGTATCTATGGACTAGGTAGAAGTTGTCCCTAACCACTGATACAGAGTCAGGTTGTACATCCCCTTCATGGTTCTGGTTAGGATTGGTGTGTGTGGTAATCTGATACAAGAATAGGGCAACTTCAAGCCTTCCCCGAGATCTGTTTGCGTGACAATGACCGTAGGCATTGATAAAACCGCATGAACAGATCTGGGACCAGGCTAGGCAAATTCTACATCAAGCTGGCCGTGTCTGGCTTTGTGAACATCTTCTTACTCCTCTTCCTCCACAGATCTGTGACCAAGCGGGTGTGGTCGTC…
CUST_1176_PI417904088	C061R061	RDH12	RDH12	SDR7C2	Retinol dehydrogenase 12 (EC 1.1.1.300) (All-trans and 9-cis retinol dehydrogenase) (Short chain dehydrogenase/reductase family 7C member 2)	RDH12	LOC106598856	XR_001327351.1,100,100.000,60,2.54e-24	XM_021574919.1,100,98.333,60,8.25e-23	retinol dehydrogenase 12-like (LOC106598856), transcript variant X3	TCTTTTTTTTTTTTTTTTTTTTTTTTTTTTTTTAGTAACATTTGATCTTTATTTACAGTAGATGTAAACATTCA*ACTCCTGACATGACTACTATGTAGTTGGGTTGCACATTTCTGGAAAATTTCCCCAAATTCCAGAATTCCTGGTTGGAGGATTCCCAGATTTCCTATTCTGTTCCTTCATAATTTCTGGAATCTTCCAACCCTAAATGTAGAAAAAGGCATGTTTCACATTTGTATAAAAGACAATCTTGGCAGTTTCACATGTGGTGAATGCTGAGGGGGAAAGAAATGGAGGAAAAGATGAAAGAAACAGGAGGGAAAATAACAGCTTGCAATGGTTTAGAAAAGGCAAGTTAAAAGCAACCAAACATAAAGCTGAATCTACATGGAGGTTTA…
CUST_16332_PI417904088	C253R090	MYH11	MYH11	-	Myosin-11 (Myosin heavy chain 11) (Myosin heavy chain, gizzard smooth muscle)	MYH11	LOC100380663	XM_014130765.1,100,100.000,60,2.54e-24	XM_021556878.1,100,98.333,60,8.25e-23	myosin-11 (LOC100380663), transcript variant X3	tctttttttttttttttttttttttttttttttttttttttTTACTTTTTCACTCTTATTTATTGTGCAGGTGGTTCCACGATTTATAGATTTGAAGAAGTGGCATGTAAACGTCAATTGAGTAAAAAAAAGACAAAACATTGTTGTAAAGGTGACCAGTGGCAGGAAAAACAAAAATATATTTTTGTTGAATATGCATCTGGACATGCACAAAATGGCCTTGATGATATTCTACTTGGCAAGGTACACAACTGAAAAAGTACCTGTCTTGTTGATACTATATGAGTATTAGACTTTAGGAACAAGAAAAGTCTGATAGGAATATGTAGGAGAAAGGGGTGACTGGTTTTGGTTTCTAAGAGTAGGAAGGTGTTCTGCTACCCACACTTGACAAAGTAT…
CUST_5965_PI417904088	C154R043	SNX8	SNX8	-	Sorting nexin-8	SNX8	-	XM_014193066.1,100,100.000,60,2.54e-24	XM_021624927.1,100,98.333,60,8.25e-23	sorting nexin 8 (snx8), transcript variant X2	ggctatctgatactttttatttaACATTAAGTGAGATTCAACATAA**CTGTACAATAGTTAAACGTTCCCGTATCTACATCTTTCACCTAATTCCAATTTTCTTTCTCAAAGATCATATAAAGCATTTGTTCCTCTTATTTTTTAAGACTTTCCAAAAAAAATAAGGTTATGACAATATCTCATGTTGACACAATAATAAGAACTTGTGAGGAACCAATTAACAGTTCCACAGAGAAGACAAAATAATGCATTGAATAACAAAACGTATTGCCCCGGAGCTCTCTAATATTACTCAGTTCTAATTGGGAGACATTTTATTACACAGCCTCATTCATGTACTTTAATTACATGTAAAACACATGCAATTTGCACATCCTGCAAGAAGAGGGTGAGTTTT…
CUST_23414_PI417904088	C208R031	BHLHE40	BHLHE40	BHLHB2	Class E basic helix-loop-helix protein 40 (bHLHe40) (Class B basic helix-loop-helix protein 2) (bHLHb2)	LOC106565752	BHLH2	XM_014133230.1,100,100.000,60,2.54e-24	-	class E basic helix-loop-helix protein 40-like (LOC106565752)	ttggGGATCTCAGAGTGACAACATCACATTGACAGTCTCTGGAAAGCAATAGCCTGATGAAATATTATTCTTTATAGAAAAAGTGTTCACTATTGAATAGAATAACATAACAATAATTTTAGCAATAACAATAAACTTAATTTTTTCTCAGATGACAATATTAGCTGAATGTTGAAAGACAACTGAAGCCTAGCTTTAAGATTGAATTGTTTGGAGACCAATATTTGGATTTCATAAAGACGCAAAATGGAGAGGATTACAAGTGCGCAACCTCCTCCTTGTATGGCAAAACACCAGTCGCAGGAGATGGCAGACATGCAAGGAAAGGATTTCCAAAAGTACGTGTCCAAACACCGAAAGGGAATGAAGCGCGTGGAAGACAGTAAGGAGACATACAAG…
10_3_7_21	C027R097	EPDR1	METTL12	CSKMT	Citrate synthase-lysine N-methyltransferase CSKMT, mitochondrial (CS-KMT) (EC 2.1.1.-) (Methyltransferase-like protein 12, mitochondrial)	EPD	-	XM_014155652.1,100,100.000,60,2.54e-24	-	ependymin-like (LOC106577537)	gggggaCAGCAGTCCGTCTGTTTGTTGGCGTGAGTGTGTGTGACATTTGGAAGCATGAGGACCTTCGTGTTGTTGATGTGCCTTGCAGTGGGCTGCCTGGCTCAGGCACCTCATCCGTGCAGGTCTCCCCCTCTTCTGACTGGAGCCATGTCAGTGGCAAATGAGAAGGTTAATGCATATGCAAAATACGACTATGATGCGTTAGGCGAGCGTATCCGCTTCAAGGAGATGGGATCTTATGAGAACAAGACATTCGGCCTGGATGCCCTTCTGCTCTTCAGAGAGGGCGTCATGTATACGATTAACCACAAGAACCGCACATGTAAGAAGGAGAGGCTGAAGAAGGAGGACTTCCACCCCATGGAGATCCCTGCAGATGCTACTCTGCTGGGGCAGGTG…
CUST_37558_PI417904088	C179R144	SLC45A3	SLC45A3	PCANAP6 PRST	Solute carrier family 45 member 3 (Prostate cancer-associated protein 6) (Prostein)	LOC106573195	-	XM_014147980.1,100,96.667,60,5.50e-21	XM_021602160.1,100,98.333,60,8.25e-23	solute carrier family 45 member 3-like (LOC106573195)	AGTAGCCAGAAGTTGTATTGACAGGGTATCGGCCCAGTGTTAGGTCTCATCTTCATCCCTGTGATTGGCTCAGCCAGTGACCACTGCAACAGCAGCTATGGCCGCCGTCGGCCCTTCATCTGGCTGCTGTCCCTGGGTGTCCTCCTAGCCCTCCTCATCATCCCCCATGCCGACCTGCTGGCTGCCTACTTCACCTGGGGCGGACGCACCCTAGAAGTGGCCTTCCTCATCCTCGGTGTGGGCCTGCTTGACTTCTGTGGCCAGGTGTGCTTCACGCCTCTAGAGGCGCTCCTCTCGGACCTGTACCGCGACGAGGAGGACTGCAACCAGGCCTTCGCCATGTTCTCCTTTATGGTTAGCCTCGGGGGCTGTGTGGGCTACCTGCTGCCTGCGCTGGAC…
CUST_9439_PI417904088	C201R128	MBOAT2	MBOAT2	OACT2	Membrane-bound O-acyltransferase domain-containing protein 2 (O-acyltransferase domain-containing protein 2) (EC 2.3.-.-)	LOC106607658	-	XM_014204848.1,100,100.000,60,2.54e-24	XM_021600127.1,100,100.000,60,1.77e-24	membrane-bound O-acyltransferase domain-containing protein 2-like (LOC106607658), transcript variant X3	CGTCGACCCACGCGTTTCCAACCATTGCGTAGAGCGGGAATGAGTCGAATCCTTCCCCGCCCAAATTATGGTTGATTTGGGAAGTATTTGCGCCTAGACCGTGCTGTAGCGCAACCGACAGCCAGTAGTGGCCAGCAGCAAACAGCAGCAGCTACAGCGGTGGATGTAGGATCAGAGTCGGGGCGAATCGGGGATCCACTGTCAGAGGGGAAGGGGAGCAGAGGGACTCTCTCAACACTCACTGAATCATGGCTACTGAAACAGTGTCACCGGCATGCACTGGATCCAGTTTGCTGCAACCCATAAGCGAAATCATCAATCTCCCTCTCGACCAGGTGAACTTTGTTGTGTGCCAGCTGTTTGCCCTGTTGACAGCCTTCGGGTTCCGTCTCTATCTCC…
CUST_10336_PI417904088	C018R043	TRIM105	-	-	-	LOC106591348	-	XM_014182566.1,100,100.000,60,2.54e-24	XM_021583244.1,100,96.667,60,3.84e-21	zinc-binding protein A33-like (LOC106591348), transcript variant X4	ggggggctcttgatttgccagttgatgtaatagtttgcccaaagtgtctactgtctgagcttcccaagtctaaatcaccaAAACGCTCCATATCACTTCATTTCATTCCTCTGTGAGGCATTTACTTCCAAAGGGTTTTGCAATGGAACAGTTGCTATAGTAAATGTCTCATCACCAGGACCCTCTTTATCAGCATCATGGGCATCATAACGTGGTCTCATTATAATGGTGCAGTAGAAATATTGTAATAAATTCTGCTTTAGTGGCTATATGTACTTTTTGGGTGACCAAATTCACACAAGTGAGTTATAGATATTTCATTCTTAAACGAGTCTAAAGTGGTAGATGTGTTTTGTACACCAGCTTCAAAAAGCTGAAACAACATTTTTGGTTATGGAA…
CUST_13764_PI417904088	C058R021	CCT3	-	-	-	LOC106580768	-	XR_001322964.1,100,100.000,60,2.54e-24	XM_021587534.1,97,100.000,58,2.29e-23	uncharacterized LOC106580768 (LOC106580768)	AAGGGTTTTGTAATGTATTTATTTTTAATCTCAAAGCATGTTTTGCAGAAGAAAAATACTGAAAGAACATAAAGTGACTGTATACTAAATTAGTGCCTTAATGTAATCTACCTCAAAGATGTGAGCCCTGCAATTCAACAACTTGCTTATCGTTTGGTTAAGGTGTGCCAGAGCTGGGTAGGTTGAGGTTCAGTTTCCTGGTCCTCTTCATGATGACATCCAAGGGTGAGGTTTTGAGACAGAGGGATCTTCACCTGGACCAACACTTCTCATCCCTGAGAGAAGTGATGGGGTATTCCATTTACACAGCCACAAATAAACAATGTTTCTCTACAACCAATATATTTGAAGCATCAACGCTATTGCTGGATTACACCAAAGGCAAATGGACAACAGTCA…
CUST_22805_PI417904088	C251R135	SLC2A6	SLC2A6	GLUT9	Solute carrier family 2, facilitated glucose transporter member 6 (Glucose transporter type 6) (GLUT-6) (Glucose transporter type 9) (GLUT-9)	-	-	-	-	0	cagtcaaCttTGCAGgacggcCACTCcTaaggAGAGTAGCAaCtgctgaacattcTCCATttatAGACaatttgtCtTACTGTggaCtaaTGAACATCaaGGCTtttAGAGATACTTTTGTAACCCTTTCCAGCTTTATGCAAGTCAACAATTCTTAATCTTAGGTCTTCTGAGATTTATTTCGTTCGAGGCATGGTTCGCATCAGGCAATGCTTCTCGTGAATAGCAAACTTAATTTTTTACATTTTTATATAGGGCAAGGCAGCTCTAAACAACATCTCCAATCTCTTTTCATTGATTGGACTCCAGGTTAGCTCCTGACTCCAATTAGCTTTTGGAGAAGTCATTAGCCTAGGGGTTCACATACTTTTTCCAACCTACACTGTGAATGTTTAAATT…
CUST_13963_PI417904088	C250R039	-	-	-	-	LOC106574291	-	XR_001321513.1,100,100.000,60,2.54e-24	XR_002471167.1,100,98.333,60,8.25e-23	uncharacterized LOC106574291 (LOC106574291), transcript variant X2	aactaacaggagatgtctctgttggtcctgggcagggaagatgaggtcgaacacctgagagtttatttctcccctgaggcATACCAAACAAATGAGGTGGAGCTCTCCAAACCCAGAATCCACCTTTAACGGAACAATGGCTTTTGTTTGCGTGCAAATAACACACTGCGTAATCCTCATGTTGGGTGTATCTGATATGTTTGTAATAGGAGATGTTGAGGAGCACAATGTGACATGGAGTGTAGTTCAGTGAAAGACATGATGGGATATGAGGTATGATATAGATAGCTTTTAGTTTCAGGGCTGACCAGGATTTTGATCATAGTATTTCACTCTCTTCCATTTTCCACAGCAAACAAAGAGGACTATGAGGAGGAATATGATGACTATTCTACACAA…
CUST_9267_PI417904088	C091R025	BHLHE40	BHLHE40	BHLHB2 SHARP2	Class E basic helix-loop-helix protein 40 (bHLHe40) (Class B basic helix-loop-helix protein 2) (bHLHb2) (Enhancer-of-split and hairy-related protein 2) (SHARP-2)	LOC106582864	BHLH2	XM_014166427.1,100,100.000,60,2.54e-24	XM_021609470.1,100,96.667,60,3.84e-21	class E basic helix-loop-helix protein 40-like (LOC106582864)	gggggattgctgtgcttGGATCTCAGAGTGACACCATCACATTGACAGTCTGCAAAGCAACAGCCCGTTGAAAGATTATTCTTTATAGAAAAAGTGTTAGCTATTGAACAGAAGAACATAACAATAATAGCAAGAAGAAGAAGAAAAATATTTATTTCTTAAATTACAATATTTGCTGACTATTGAAACAGATCTGAAGAAGCCTATTTTTAAGGTTGAATTTTTTGAAGACCAATATTTGGATTTAATAAAGACGCAAAATGGAGAGGATTACAAGTGCACAACCTCCACCTTGTATGGTAAAACACCAGTTGCTGGAGATGGCAGACATGCAAGGAATGGATTTCCCAATGTACGTGTTCAAACCCCGACGGGGGTTGAAGCGCGGGGAAGACACTA…
CUST_18917_PI417904088	C054R116	MRC1	MRC1	-	Macrophage mannose receptor 1 (MMR) (CD antigen CD206)	MRC1	-	XM_014180754.1,100,100.000,60,2.54e-24	XM_021562980.1,100,98.333,60,8.25e-23	mannose receptor, C type 1 (mrc1), transcript variant X4	TTGGCCTGAATACACCACAGCCAGATCCCTCTCTCCTTTCTGGACTGGACAACCACCTTTTCGCCCTGGGATAGCAAACTATGCACTAGCTATGATGGAATCCAGTCCATCCCTCGCTGTGCTCCTGTGCCTTATGCATGCTCTCTGCTGCGCTGCTGAGATAGACAGCAGCTCCTTCCTGATCTACAACCAGGAACACAACAAGTGTGTGGTGGTGGTGAGCGCCAGTCAAGTCACAGTGGCTCCCTGTGACCACACGTCCCAGAACCAGCAATTCCGCTGGGCCTCGCAGTCTCGTCTCCTCAGCATCTCACTGAAGCTCTGCCTGGGGACTCAGGACCTGAAGGACTGGGTCAAGGTGCTGCTCTTCCCCTGTGATGAGAAGAGTGAGCTCCAGCA…
CUST_10142_PI417904088	C095R005	IL12B	IL12B	-	Interleukin-12 subunit beta (IL-12B) (Cytotoxic lymphocyte maturation factor 40 kDa subunit) (CLMF p40) (IL-12 subunit p40)	IL12B	LOC106603888	XM_014198098.1,100,98.333,60,1.18e-22	XM_021624179.1,95,98.246,57,3.84e-21	interleukin-12 subunit beta-like (LOC106603888), transcript variant X2	gtgggacaatccagccaggagaaacactCATTATCTCATTATCAAGATGAACAGGTTCCTACACCATGTCCTGTATCTCATCCTTCATGTGGCATCAAGCAGCCAGTATGGGACAGAGACCATCGAGACTCTCATGCCAAATGTGAAGGTGGTGAAGGTGGATCTGAAGATCTTCACTGAGACGCAGGTCCCTCTGCTCTGTGGGGACTCCTATCAGGACACAGAGGTGATCTGGATGAAGGACAGTGAGCTTGCAGGACAAGGGAACCAGATCAAGGTGAAAGTGGAGGAGATGATGGGAGCGAACTACAGCTGCCACAACGCTGCTGGGGAGTACCTTAACCACACTCTGGTGCTGGTGCAGGACATACCATCACCCAACAGAACGAGACGCGTCCT…
CUST_1436_PI417904088	C133R170	UBTD2	-	-	-	-	-	-	-	0	ggggtgatcttggtttgtgaagttggtaggcactgcgtcggattagttcccttctcattccccagtaaacatcccatcatGTAAACATGACACTTTCACCCTCCTGTTGTCTATTCATACCTGATATTAGCTTGAGATGAAATACAGGTTTCTACTTTTTACCGGTGCAGAACTTAAAAAACTACAATGTTGTACAAACTGAATGTGCTGGGATGAAGTGTCATTGCAAAGTTTTTAATGACACTGTGTTTAGAAATTCTGCTTCACTGTACTTTAAGATACTTATCAAAGCAATGTGTTTAGCATTGCGTAATCATTTGTGTGTGTGCGTGTGAGAGAGAGAGACAGAAACCGAGAGAGAGAGAAAGAGAGAGAGTGTGTAATGCATGTTTGAGAGGG…
CUST_9347_PI417904088	C179R009	NRP1	-	-	-	LOC106568842	-	XM_014139560.1,100,100.000,60,2.54e-24	XM_021613140.1,100,98.333,60,8.25e-23	neuropilin-1a-like (LOC106568842)	tcatcatgtatttaatgggtattttgtgttgttatgttccattggtgctctcacaatgctgcctggaaaaagagtgcgttATTATGGCCAATGGTTATGTTCGCTACAAGAAGAGAGTGAGGAGCCCATCGGCTGTCTGAAATGACACCCTATTCCCTGATCAATAGTAGTGCACTATATAGGGAATAGTGTGGCATTTGGGACGCAACCAGACGACAGACTGGAGGGGGTGAAGCATCTCTAGGAGAGAAAAAAATGTATGCCACTGCTATGACAATACTTGGGCCAGTTTCCCAGACACAGATTAAGAATCTCTTTGAGAATGCTTTTTAGTCCTGGACAAGGCTTGATTTGGGTTCTGGGGAACTGGCCCTACATGTCTATGGTAGAATGATGGAC…
9_4_12_14	C059R148	SLAMF8	SLAMF8	BLAME	SLAM family member 8 (B-lymphocyte activator macrophage expressed) (BCM-like membrane protein) (CD antigen CD353)	LOC106577850	SLAF8	XM_014156243.1,100,100.000,60,2.54e-24	XM_021614817.1,100,96.667,60,3.84e-21	SLAM family member 8-like (LOC106577850)	ctagaacagcagcgctcatcaaaggaaatctcttctctctcttctctactcttctcagtgcgtgttttggTGAGTCTAGCTAGCTACGAGTCAGTCACAGAGAGATAGGGAGGACGTAAAGACAGATGAAACAGACATACAACACCTAACAGAGATGTCTGGTGGTCCCCTCTCCTCCTTCTCCAAACAGGGAATACTCCTACTCTCTATCCTCCACTATGGTGTGGGTATTTCTCTGTTCAACAAAGCAGTGGGGGACTCTGTGGAGCTGCCCTCAGGCTTAGAAAGGGAATGTATCAAGTCAATGGAGTGGAAGTATAAAGAAATGGTCATTGCAGAATTTGATGGGAACGTTTCCTTACCAAAATCACAGTTTGAGGGGAGACTGGAGATGAACGA…
CUST_30765_PI417904088	C120R128	ABCB6	ABCB6	-	ATP-binding cassette sub-family B member 6, mitochondrial	LOC106574323	-	XM_014150165.1,100,96.667,60,5.50e-21	XM_021608943.1,100,93.333,60,8.31e-18	ATP-binding cassette sub-family B member 6, mitochondrial-like (LOC106574323)	CATCAATGTCTTTGTCCGGATCTACTACAAGAACATCGTGAATGAGCTGACTGATGGAAGCAGCTGGAAGACCTTGGTCACCACTGTGTGTGTCTATGTCCTGCTCAAGATCCTGCAAGGTGGAGGGGCAGGTGCGTCTGGCTTCATCAGTAACATGCGCTCCTTCCTGTGGATCCGCGTGCAGCAGTACACCAATCGGGTGGTGCAGGTGCGTCTGTTCGGCCACTTACACTCACTGTCGATGCGCTGGCACCTGGGCCGGCGCACCGGGGACGTCCTGCGTAGCATCGACCGCGGCACCTCCTCCATCAACACCCTGCTCAGCTACA
4_2_20_21	C127R044	TGFBI	TGFBI	BIGH3	Transforming growth factor-beta-induced protein ig-h3 (Beta ig-h3) (MP70) (MP78)	TGFBI	BGH3	NM_001140391.1,100,100.000,60,5.18e-26=XM_014213300.1,100,100.000,60,2.54e-24	XM_021583240.1,98,98.305,59,2.97e-22	transforming growth factor beta induced (tgfbi)	ttgGGCCAACAGAATAAAGGGAAAAGGCCAAGATGCAGCACTTAACTTTATTGACTTTGGCGCTCACCTTGATTGCAACGATTTGTTTTGCAAAGTCACCCTATCAATCAGTTCTTCAGCACAGCAGAATAAGAGGCAGACAGCATGGACCCAACGTGTGCGCGATGCAAAAGATACAGGGGACCGACAAGAAATATTTCACCAACTGCAAACAATGGTACCATCGCAAGATCTGCGGCAAGCCAACGGTGATCAGCTATGAGTGTTGCCCCGGTTATGAGAAGCTTCCAGGAGAGAAGGGGTGTCCTGCTGCCTTGCCGTTAGTGAACATCTACAACACGCTGGGTGTGGTTGGAGCCGCCACCACTAAGATGTACTCAGAGAGGGCTCAGCTGAGGG…
CUST_996_PI417904088	C230R053	GPC1	-	-	-	LOC106568852	-	XM_014139581.1,100,100.000,60,2.54e-24	-	glypican-1-like (LOC106568852)	ggggtcTGTATAATTCAAAATCCCCCCTCTTTTTAAACGCTGCACTTTTATGACGTAAGAGGCCTAGGAAGTCGATAGGATGGTATTGTCTGCACAAAGACTGAGATCAGAGATCACAAGATGGCGATCGATAGGTGAGTCGACACTCTCCATAAACGTCTATCGATGAGTATTTGTGTATGCAGATAAATATGGACCACTGAGATGGCTGCAGTTTGAGAAGGGTGAAATAGCATAATGTATAACTTGAACCTGGGTTCAACTACTATTTGAAGTCTTTCAAACACTTTGTGTTTGCTCTACCCTGCCTTGGGTTTGCAGATGGGCGGAGGTTGCGGTTTTGGGACTATTCTATTGGTCCATTAAGCCAGGCCAGCTCAATCAAGCACAGATAAAGTA…
CUST_17117_PI417904088	C266R130	IRF7	IRF7	-	Interferon regulatory factor 7 (IRF-7)	IRF7	IRF3	NM_001136548.1,100,100.000,60,5.18e-26	XM_021600509.1,100,96.667,60,3.84e-21	interferon regulatory factor 7 (irf7)	AAGGAAACAAGGCAAAGTTTATTGATCTTGTTTTGCAATACTATACAATTGTGCTTTTCAATGCCAGTGTGAAGTTTACTCACTTTCAGTACAATAAAACAGATTTTTCAATACAAAAGAGAACAGACTGAAGGGTTGAGTGACCTAGACAGGTTTAAAGTGTGGCCCATAGGGACAGAAGGGAATTCAGTATAAATACCACTAAATGAGACATTAACACATTAAGCACGCAGCGATAGTGATTTGATGTATATTTAAAAAGACACACACACACAGTTAACCTGTCAAGAGAAGGATGGCCTATACTACTGCATGACACATTGACAGAAACGATACAAATCAGAATAATCTAACAGGGCTCTCCAACTCTGTTCCTGGAGAGCTACCATCCTGTAGGTT…
CUST_4850_PI417904088	C190R097	KDELR3	KDELR3	-	ER lumen protein-retaining receptor 3 (KDEL endoplasmic reticulum protein retention receptor 3) (KDEL receptor 3)	LOC106607138	-	XM_014203762.1,100,100.000,60,2.54e-24	XM_021625103.1,100,100.000,60,1.77e-24	ER lumen protein-retaining receptor 3 (LOC106607138)	TACGGATTTTGCAGAAACTGGCAGCCACGTCACCGCTACAGGTCTGGCCAACTTTCCCAGCCCTTTGCGGAAAGTGCTGCAGAGGAATCCCTATGCAGAATATATATAATGAACGTTTATGAGCATTTATAGTGATTTCCAAAGAACAAGAGGACATAACATTTGGGAACATTGGAGTTATTTGGTCTTTTTTGTTTTTTAGAGGAGTCTCATTTTACATACGTTATTGTTTTGACATCGCCTGAAGACTACATTGAGGCCTCATTCTTACAGACTTGTACCAATATTTCGACTCTTTCTTTTTGGAATACCAAAACAGCACTATGAATATCTTCCGTCTAGCCGGTGACGTGTCACATATCGTTGCTATCATCATTCTATTAGTGAAGATATGGAGGT…
6_2_14_8	C171R099	GRAA	GZMA	CTLA3 HFSP	Granzyme A (EC 3.4.21.78) (CTL tryptase) (Cytotoxic T-lymphocyte proteinase 1) (Fragmentin-1) (Granzyme-1) (Hanukkah factor) (H factor) (HF)	GRAA	-	NM_001141037.1,100,100.000,60,5.18e-26=XM_014143478.1,100,100.000,60,2.54e-24	XM_021622235.1,100,98.333,60,8.25e-23	Granzyme A (graa)	ACTATCGCATGTGATTTATTTACAACTAGTACAAGACTTGACATGTCAGGTTGAACATATAACAACTAAAAGGAGAGTAAAACACCTGAAATGTCTGTTTGTTTTCACATTTTAATTTTAGAGAGCAAAGATTGTCAAGAGTTCAAACATACTTCACAGCTTCCAGCACATGAGCTATAATTCAAATTCAGTAAACATTAAATAATTTCACAATTATTGAGAAAAGCCTGAGAAAGCAGGTGTCAATCAGTCAATCAATGACTTCCGCATGGTTTTGTTGATCCAGTCAAGGTACATTCTTGATATGAGTGTGTACACTCCAGGTTTGGTCTTGATGCCACATTTTATACCGAAGGACACGACTCCCCTTAGCTCACCTCCACACACCAACGGGCCACC…
CUST_23823_PI417904088	C160R027	STAT1	STAT1	-	Signal transducer and activator of transcription 1	STAT1	-	NM_001141285.1,100,100.000,60,5.18e-26	-	Signal transducer and activator of transcription 1 (stat1)	GGGGGATTGACAATACAAATGTTAATATCATATGTTGTCTGAGCCACCAGGCTGGTGAAGTGGAGGGACCTTTCCCATTTATCTTGACTTCACCTTTTCGTACCGTTTTCAACGTTATTCAAGATGGCCCAGTGGTTCCAGCTGCAGCAGCTAGACCCCAAGTACCTGGAGCAGGTGGACCAGCTGTATGATGATACTTTCCCTATGGAAATCCGCCAGTACCTCAGTACCTGGATAGAGAGCCATGACTGGGACATGGTGGCCATCAGCGATTCTCTTGCAGCGGTCCGTTTCCATGACCTCCTGGCCCAGTTGGACGTTCAGTACAGCCACTTCGCCCTGGAGAACAACTTCCTGTTGCAACACAATATACGCAAGATTAAACGCAACCTGCAGGAC…
CUST_7800_PI417904088	C227R136	ZBTB46	-	-	-	LOC106600541	-	XM_014191967.1,100,98.333,60,1.18e-22	XM_021588887.1,100,95.000,60,1.79e-19	zinc finger and BTB domain-containing protein 46-like (LOC106600541), transcript variant X2	ACTTAGCCTATCAAAGGGCAAGGTCCTTCCAGACCTACAAGACATGTTTTGGAGTGCCTGGATGCTACAAGGTACAGGAACAGAGTGAGCCACAATGTTGGCTCTGGGAATTGGAGTTGGTTTGCCGGAGGTGGTTGCAAACATACCATCTGCCACACTTCCATTTTTCCATCTGTCCCAATGCTAAACACCGTATCCAACGAACATCTGTCCCAATGCCTAACACCGTATCCAACGAACACTCCTCTGCTGTCTGTTTGATTTCACTGGTTGGAAATGCCTTCTCCATGTGTGGTGACGAGCTTTATTCAAGTTGCATTATTTTAATTTGACCCATCCATCAGCAATCTCTAATCTGTTGACGTTTTCAGAAAGGAAACAAATGACGTTGGGTGGATA…
CUST_24984_PI417904088	C105R066	RAB11B	-	-	Ras-related protein Rab-11B (ORA3)	LOC106573573	RB11B	XM_014148723.1,100,100.000,60,2.54e-24	-	ras-related protein Rab-11B-like (LOC106573573)	aaagaccagcgcattgtctcacgcattgggttatagagaaaacactgcaactaacttcAGACCAAGAATATATCGCAATTAAATCGGAATTTGACTATTTCTAAGACATGGGCAACAGAGATGATGAATACGATTTCTTGTTCAAAGTGGTGCTGATCGGAGACTCTGGTGTGGGGAAGAGTAACCTGCTGTCCCGTTTCACACGGAATGAGTTCAACCTGGAGAGCAAAAGCACCATTGGTGTGGAGTTTGCCACCCGCAGCATTCAGGTGGATGGCAAGACAATAAAGGCCCAGATCTGGGATACAGCTGGACAGGAGCGTTACAGAGCCATCACTTCAGCGTACTACCGGGGGGCAGTGGGGGCTCTCCTAGTGTATGACATCGCCAAGCATCTGA…
CUST_6260_PI417904088	C263R103	G0S2	G0S2	-	G0/G1 switch protein 2 (G0S2-like protein)	G0S2	LOC106565122	XM_014131878.1,100,100.000,60,2.54e-24	XM_021570342.1,100,95.000,60,1.79e-19	G0/G1 switch protein 2-like (LOC106565122)	GGGGCAGGACGCCCTGGACTGATAAATACAAAAAAAAAAAAAAGACTAGATCAACCTACTTGAATAAAACAACATAATCCATCCGGAATGGACACCATGCACGAAATCATCCCCTTCGCTAAGGAGATGCTGGCGCAGAAGCCCAGCAGGCGCATGTTGAAGGTGTACTTGGTGGGCTCCGTGATTGCCTTCTTGGGAACGGTTCTGGGCCTGGTGGAAACAGTCTGCCAGCCCTTCTCCTCCGGGGAGCCGCTGGACGCCGAGCTGGCTCTGCTGATAGCCCGGGAGCAGAAGACACTGGAGGAGGAGGAAAGGAGACAGGAGGAGGTAACAATAGTTTCAGCCACCGAGCAGATCACCATTCCCAAGAAGCTGCTACAGGCGACCGGGGTTCAGAGA…
CUST_17795_PI417904088	C136R006	PLEK	PLEK	P47	Pleckstrin (Platelet 47 kDa protein) (p47)	LOC106597664	-	XM_014188822.1,100,100.000,60,2.54e-24	XM_021611063.1,100,98.333,60,8.25e-23	pleckstrin-like (LOC106597664)	aaacaacaactgaaatattttattAAAgTAAAGTAAtGGgAaaaAATGATTGTTAAgggaTAATCAGCAAtggcagTcccTACCATcatgGGACTATTAATTGTTTTATTCTGTGTTACAGCATTCAACCCAAATCATTGAAACTGAAATAAAAAAAAACAGATTATTTTTTTAATAATCAAACCAACCTCAAAAATCACTAATCGCTGAGCACTACATCCTGGGTAACTGTATGAAGAATAGCTTGTGTAGGAGAGTAGGTCGAGTTTAAATGAAATAAACGGTTGGAGAAGCGGTCTTTAGCTGAGGTGAGAGGTTTGACGTGATGCTTTTTTGTGAAAGTCAATTCATCTTCCATGATGCCGTAATGCCCGGTTGGAGTAGATTAACATGAGAGTC…
CUST_26122_PI417904088	C224R141	B3GNT3	B3GNT3	B3GALT8 TMEM3	N-acetyllactosaminide beta-1,3-N-acetylglucosaminyltransferase 3 (EC 2.4.1.149) (Beta-1,3-galactosyl-O-glycosyl-glycoprotein beta-1,3-N-acetylglucosaminyltransferase) (EC 2.4.1.146) (Beta-1,3-galactosyltransferase 8) (Beta-1,3-GalTase 8) (Beta3Gal-T8) (Beta3GalT8) (b3Gal-T8) (Beta-3-Gx-T8) (Core 1 extending beta-1,3-N-acetylglucosaminyltransferase) (Core1-beta3GlcNAcT) (Transmembrane protein 3) (…	B3GNT3	-	XM_014149287.1,100,100.000,60,2.54e-24	XM_021572819.1,100,98.333,60,8.25e-23	UDP-GlcNAc:betaGal beta-1,3-N-acetylglucosaminyltransferase 3 (b3gnt3)	ttctttcaataggacgcaggcagaaaagagcaacaaaaATGAGAAGGTTGTCTCGTTTGCTTGAATTTACAGCTTTACTTGTGATCAGCATTCTGTGCTTGGTCATCATTTTTATTAAAGAGGACATTCGTCCTAAAAAACCCTCAAACCATTTCCAGATAAACAGGAGGGAATCAACCTATCAAAACAGACCTCAGAAACCAACCAGTGAGAGCGCAGGTGTTTCTACCTGGGTTCATTGTGAACGGAATGAGTCTGCAGCCAATGTGTCAGGGTTTTCCTCTCTGCCAGTTCACATCCAAGACTTCCTCTTCTATCGTCACTGCCGCCACTTCCCAATGCTGCTGGATGTACCTGATAAATGTAGAGGCCCTCACAAGTCTGCTGACGTCTTCCTTC…
CUST_41605_PI417904088	C029R132	IFNG1	IFNG1	-	Interferon gamma 1 (Interferon gamma) (Interferon gamma 2)	-	-	NM_001123558.1,100,96.667,60,1.12e-22	NM_001160504.1,100,100.000,60,1.55e-26	interferon gamma (ifng)	ttttttttttttttgTTAATGTCAGTTTATTCACTCATAGAACTTACAGATCTTGCTTCAACTGCAAGAAATAACTCTTTATATTCCAAGAGAAAAGCATTTTCTAATTAATAAATAATAAATATGAATTAGCAAAATAGATTTCTTTTGATTCATGAAAAATAAATACTCTTTTGACAATGATAAATAACTTAATAATAGAATAAATATCTTAACAAAATAAATAGAGTTTTGTATCAAGGATGTATGTAGCTTCAATATGTATCTCCACTGTGGCTCCGGAGGGCAGTTTCCCCTTGGTACACACAGATCTAGAATCAGCTCCCCCTCCCACAATCCTAACCTTCACCGTTAGAGGGAGAAATGCTAAACTGACCCAAGATCAGCTTCCAGGTGTAA…
CUST_1282_PI417904088	C144R112	TSKU	TSKU	LRCC54 TSK	Tsukushin (Tsukushi) (Leucine-rich repeat-containing protein 54) (Z-TSK)	LOC106567926	-	XM_014137827.1,100,100.000,60,2.54e-24	XM_021623488.1,100,100.000,60,1.77e-24	tsukushin-like (LOC106567926), transcript variant X5	AGAGCTTCGGCCTGTTCCACAGCTTCAGCCTGACCCGGGTTGACTGTAGTGGGGTGGGCCGTGGTCATGGCCTGGTGGTCCCCATCTCCATCCCCCTGGACACCTCCTCCCTGGACCTGTCCTCCAGCTCCATCCACACCATCGCTGACTCCATGCTGTCTGGGCCGGGCTACACCACGCTGGCCAGCCTGGACCTTAGCAACAACCTCCTCTCCAGGCTCAACAGCAGCATCTTCTCCAGGCTGCGCTACCTGGAGACCTTGGACCTGAGCCACAACACCCTGGAGGAGCTGGCCCCCGGCTGCTTCTCTGGCTTGCCCCTGGCCGAGGTGGACCTGAGCGGCAACAGGCTCCAGGAGGTCAACCTGGAGGTCTTTTCCAACAAGGGCCACGGTGCAG…
CUST_20552_PI417904088	C081R148	LIPH	LIPH	-	Lipase member H (EC 3.1.1.-)	LIPH	-	NM_001173770.1,100,100.000,60,5.18e-26	-	Lipase member H (liph)	TCTTTTTTTTTTTTTTTTTTTTTTTTATTTGATGAACATTTTTATTTGGCCTTACTGCTATTAGCCCATACAAATGCATTGAATAACCAATTCACTACATGGGGAAAAACAGACAGCCCCCCCCCCCAAAAAAATAATCTAAAGGAAGTTTGTTCTTAAGTGTCTGTCGTATATCTGAGCGATATAAGAAAGAGCAAGCAACATGTATTTAACCCTTACTTCTGGCACTAAACAGTCTCCATATTTACTTCCATAAATGTTTTTCAACCGGTACCGGGGGACCTTCAGACAAGTCTTGTGAAGTCCTAGAGCAAAACAACTGATATTTACTGACAGACAAGTCCCAAGACACTTGTGGGGGTCATAGAGCAAAACTGAGAGCACAATCGTGTTCGAGAG…
CUST_12382_PI417904088	C111R093	ARI5	-	-	-	LOC106577782	-	XM_014156123.1,100,100.000,60,2.54e-24	-	uncharacterized LOC106577782 (LOC106577782)	caacaaacaggacgacattagtaaggtttcttaatgcctctcttatgattaaaaggcaatgctttgaaaaatgtatgaacTGTATAGTCAACTGTGGCCAGACAGTGTAGATTGTATCTTGAAAGTACCTCATGTAAAGGTATTAGGAACATATCTACTTGTCATGTTTATTATTTTCTAATTAAAATGTAAGGAAATGTAATTAATCATCTGAAATGGAATGTTGAAAGGAACATAATCACATACTGTATATGGTTGGTCTCTGTGTTGTAAATAATTTGGCAGCGTTCATTGAAACTGGATTCCATTTATGTAGGTTTGTCCTGTTCTGGCCCCGTGGCATTTGAAAATTCTCATGCACCACTTGTCCCAAGGATACCTTTTTATCACTGTTTTCGT…
CUST_15126_PI417904088	C197R083	AMDHD1	-	-	-	LOC110500044	-	-	XM_021577160.1,100,98.333,60,8.25e-23	tetraspanin-9-like (LOC110500044), transcript variant X4	AGACAGAATAAGCTTAACTTTTATTGAACACATCTCAGTAACACTGGTTTTACAAGAATAAATCCATACAATATAAATGTAATCCGTTTAAGGATTTCTAAGGCATGATATCGAACCTCTCTTTCCCATTACTCTATTTTGTGTTCAAGGCATTCTATTATGGATGACTGAGGGGTGTCCCTATTCCCATACACACAATCCAACCCCCCCTTCCTCACCCACCCTTAGTCCCCCCATAACTGAACTAGGGCCAGGATTCAATCCGACCGCGGGTTGTCGACAATTCAGCTTTTTTAAAGGGAATTTCTGATTGAGCTATATGTAGCATTTGGGTCCTTCCACAAAATAACATTTTGGGCAGTGTAAATTGGTCAAAACAAACTATTAATTTCACATAAG…
CUST_24506_PI417904088	C149R089	TYROBP	TYROBP	DAP12 KARAP	TYRO protein tyrosine kinase-binding protein (DNAX-activation protein 12) (Killer-activating receptor-associated protein) (KAR-associated protein)	LOC106577768	-	XM_014156099.1,100,100.000,60,2.54e-24	-	TYRO protein tyrosine kinase-binding protein-like (LOC106577768)	gggggcacacggacacacagttacaggacACACAGACCACTGTCTCTAGCACTCCTACGGTTTACATATTACCTTGTCTGTTTTGCTAGCTCTACCACAGAGTCATTGGGGACAGATTACCTTGGACAAAGTACCAAGGACCCGGAACCTTAGACCTCTCCTCTCCTCTAGTCTCCTTATTAGGACCAGGCTGAAAATGGGCAAGGCCCTCTGTATCGTGGCTCCCCTGAAAGGAATGTTTGGTCCTGCCGAAGGAGAACAAGACTGTGGCCACTGCTATCAGATAGATATGGGGGCCGTGGTGGGCATCATTGCCTGTGACATCATCCTGACCCTCCTCATCGCTCTCGCCGTGTTCTGTTTTACTACCTTCCGGAAGAAGAGGAGTCAACAGGAATC…
CUST_24425_PI417904088	C064R002	UBC	-	-	Polyubiquitin [Cleaved into: Ubiquitin] (Fragment)	-	-	-	-	0	gacagttATAGTTTTATACATGTTTATTACTTGAaaACAATCTCATTAAAATATGCctataTCAGCCaTGCTTAATTTAATGTTTACAATTGAATACAAATGTAAAacAATTCACATTTTTGTTCAaAaATGATTGCTTTTTctctataaacaTGGAATgCaTAAAAAaTTAAGGGCTTCAtgGGACAGGGGGTTTCAGGGCGAAacggGGTTTCTTCAgCcTCCCCTTAAacggAacGTCAAAAGGATGGGGCtTTGATTTCTGaagTTgtaatactcCAGCGGCTGGAAAtCCTCGAGCCGCCTACCCCCATGAATCAACctcTGTTGGTtGGgaGGGACCCCCCCCTTGTTTTGTACCTTGGCTTTGAACTGGGTTACAGTctcACCagGcacCAC…
CUST_20010_PI417904088	C045R064	CYB5	CYB5A	CYB5	Cytochrome b5	LOC106590088	CYB5	XM_014180637.1,100,100.000,60,2.54e-24	XM_021563077.1,100,95.000,60,1.79e-19	cytochrome b5 (LOC106590088)	GGGGGAGCTTCCCGGTGCGTGCCAGGAATTACAATACAAATCTCTGAACTCACTTTGTCATCTAGGCTAAATGTCGTTACGTGTGTACTTGTACATAGTCACTGCATCGAAATATTTGTAAGATTGGAACATAATTCTTTCCTGGATTCACATTAGGTGTATTTATTTAAAATATAAATGGAGGATAAAGAGGAGAACGGACAAGCTGTAAAATACTACCGACTGTCAGAAATCGAGGAACAGAATACGTTCAAGAGTACATGGATTATAATCAATTTTAACGTCTACGATGTCACCAAATTTCTGGAAGAGCACCCAGGTGGAGAGGAGGTCTTGAGGGAACAGGCAGGCGGTGATGCCACAGAGAGCTTTGAAGATGTCGGGCACTCATCAGATGCC…
CUST_15553_PI417904088	C113R123	ANP32E	ANP32E	-	Acidic leucine-rich nuclear phosphoprotein 32 family member E	LOC106569900	AN32E	XM_014141617.1,100,100.000,60,2.54e-24	XM_021560455.1,100,100.000,60,1.77e-24	acidic leucine-rich nuclear phosphoprotein 32 family member E-like (LOC106569900)	AAATCCAGCCCCCCCCCCATCCATTTATTTTAGAGCCCTTACACATTGAAAAAATTTGGGGGGGTCATTTAACATGGAATGATTAACAAATTAATTGTCGATAAAATCTCATTTTCATATTGTATCTCATATATATAAAAATGAAAGAAACAGCCTCTACAGTGATATCTATGGTATACAAAGAGAAACAATCTGCAAGATCACACTTTTTTGTGGTTATTGTTCTACAGCTTGGATCTGGATCCAGAGGTTCGCTGGGGAAAGACAAGCCTATTCGTCATCGTCGTCGTCGTCATCTTCATCATCCTCCCCTTCATCCTCAGCATCCCTCTTCCTCTTCTCCCCTTTGACTCCTGCCTTCTCCTCTTTTCCATCCTCCTCCTCTGCGTAGTCATCATC…
CUST_24379_PI417904088	C229R112	GSTT1	GSTT1	-	Glutathione S-transferase theta-1 (EC 2.5.1.18) (GST class-theta-1)	GSTT1	LOC106580120	XM_014160813.1,100,98.333,60,1.18e-22	-	glutathione S-transferase theta-1-like (LOC106580120)	CGGCAATCATCATTTATTCGAAAAACTACTTTTCCATCAAGTTCGAGAAACGTAAAATCCACCCGTCGAACAGATAAAAATGTTGATCTTTGGAACATGTCTTCTATAGCTGCCGTTTCTATTACATCATGGTGCAATCATTTGAAATGTACTTGATTAACGTTACTATATACTGAACAAAAATATAAACGCAACCATTTTACTGAGTTAGAGTTCATATAAGGAAATCAGTCAATTGAAATAAGAGGCTCTAATCTATGGATTTCACATGACTGGGAATACAGATATGCATCCGTTGGTCACAGATACCTTTAGAAATATGGGAGTCAGGATCTCGTCAGTGTCTCTGTGCATTCAAATTGCTATCAATACTTTACATGTGCATTTATTTTTGTTCAG…
CUST_31515_PI417904088	C134R093	CTTN	CTTN	EMS1	Src substrate cortactin	LOC106561907	-	XM_014126246.1,100,100.000,60,2.54e-24	XM_021585717.1,68,97.561,41,3.01e-12	src substrate cortactin-like (LOC106561907), transcript variant X3	GAGAACATTGCCAAGCAGAAGGAGGATGAGGACAAGAAGCGGGCGGAGGAGGAGAGAGCTCGCCGCCAGGCCAAGGAGAAGCAGGAGCAAGAGGAGGCGTGGCGCAAGATAGAGGAGACGGCCAAGCCTGCCTCCCCGTCTCCCGAGCCCAGCCTTACCATTAGCCCCACCCCTCCTGTCCAGAAAGCCGCACCTTTGCCTGTCCCTGCACCTGCAGCCGCCGACCCAGTTTACCAGGACTCTGGTGTGTACGAGGATCCTGCAGCAGAAGAGAATGGGGAGGAGCTGTACGAGGCGGAGCCCACCTCCCGTCCCTCTGCCGAGCAGACGTATGAGGAGCCTCCCGTCCAGGAGGCGGCGCTCTACCAGAGTCCTGACGAGACAGGAGACGCCCAGACA…
6_1_3_5	C115R005	ETV4	ETV4	PEA3	ETS translocation variant 4 (Polyomavirus enhancer activator 3 homolog) (Protein PEA3)	LOC106589303	-	XM_014179095.1,100,100.000,60,2.54e-24	XM_021576022.1,100,98.333,60,8.25e-23	ETS translocation variant 4-like (LOC106589303)	ATTGATAATAGGTTATATGACAGTAATTCTCAATGGTATTTGAAGGGACAATATTTGTTCAGTCTGGAATGATAACAAAAAAAGAAAAACACTGAAAGTGTTAATAATTAGGATACTACTACTAATAAAAAGAATAGGAGAATACTAGCCTTTTAATATCCTTTTTATAATGTAACGTGATTATTTTAGTATTGATTTCCATATTGAGTAATTAACTTAACCAACTAGTGACAGTGGGAATGTTCTAGGTAGCCTATGACATCAAAGGTAGGCTACATGTCATGTTTGAGTGTATTTCCCACTTCTGTAATATTTCTGATGCTTTGCAGAAGTCACAAGGAAATGGGCCCCTAAATAGACTGTTGATGGCTGCAAAAAGGAAATACATGGACACGGAAT…
CUST_15414_PI417904088	C031R045	MSMO1	MSMO1	SC4MOL	Methylsterol monooxygenase 1 (EC 1.14.18.9) (C-4 methylsterol oxidase)	-	-	-	-	0	cagccgcatcaagtgttgtccagtctcctcccagcccatccccaccagccaatcagaatggaggtgaacagtacggccacCATCTTGTCCTCAGCCTTCCTGGCTGTGGAATATGTTGATGCTGTCTTACCTGACAACCCTCTTCAGCCTTCACTACAATACGCCTGGGGGTATGTGAATGAGAACTACACTAAATTCCAGATCGCCACCTGGGGTTCTCTCATCGTCCATGAGGCCATCTACTTCCTGTTTTGTCTACCTGGTTTCGTGTTTCAGTTCCTTCCCTTCATGCAGAAGTACAAGATACAACAGGATAAGCCAGAGACGTGGGAGAAACAGTGGAGATGCTTTAAGATGCTGCTTTTCAATCACTTCTGTATCCAGCTGCCGATGATCTGT…
CUST_25620_PI417904088	C172R003	ABCC5	ABCC5	ABCC5A MRP5	Multidrug resistance-associated protein 5 (ATP-binding cassette sub-family C member 5) (Multi-specific organic anion transporter C) (MOAT-C) (SMRP)	ABCC5	MRP5	XM_014213394.1,100,100.000,60,2.54e-24	XM_021587253.1,100,100.000,60,1.77e-24	multidrug resistance-associated protein 5-like (LOC106612343), transcript variant X2	CAGAGGTGGTGGAGAATGGAGAGAACTTCTCCATGGGAGAGAGACAGCTGCTCTGTGTTGCTAGAGTCCTACTCAGACAGTGCAAGGTCTTGATCTTGGACGAGGCAACGGCAGCAATGGACTCGGAGACGGATTCTCTGATCCAGGAGACAATCCGCAATGCCTTTCAGGACTGCACCACCCTGACCATACCCCACCGGCTGCACACCGTACTCAACTGTGACCGCATTATGGTGCTCAACCAGGGACAGGTGGTGGAGTTTGACGAGCCGTCCAACCTGCTGGCCAATGAGAACTCTCGATTCTGTTCCATGCTGGCTGCCGTGGAGAACAAGATCTCTGTGAAAGGCTAAAATGGGTACAGGAGGCACAGACATGCCCTGGAGATGAGGAGAGGGG…
CUST_18020_PI417904088	C093R071	ME3	-	-	-	LOC106586750	-	XM_014174330.1,100,100.000,60,2.54e-24	XM_021597955.1,100,100.000,60,1.77e-24	NADP-dependent malic enzyme, mitochondrial-like (LOC106586750), transcript variant X2	ACAATATTCACTTAAAAGTGAATTTTATTCCCTTCAAAAACATTTAGTCTTTCCTTAAAAAACTGAAATATAATTCATTTCGTAGTGCATCACTCGTAGTGCATTCTCTGGGGGAAAAGGAAAGATAAGATTCACCCTATTTCTGTTCTTACCTTTGGCAAAAACACCTAAACCGAAACAGGCAAAGCTTTATACAAAACAACACTCAAATAAGCAGCCCCTCCATTACATAAAAAACATACTTAAAGAGGCAATCATATATCTAATCACCGTGCTTGCCAAAGATTCCTCTGTACATAAACTTTCGGCACCTCACAGACCTGAAGTCAGTTCCTACTGGTAGTGACATTGGGGCTAAAACCATGTAGCTATGCATCTTGTTAAAACTCTGCTGACACT…
CUST_15165_PI417904088	C230R128	BPI	LBP	-	Lipopolysaccharide-binding protein (LBP)	BPI	-	NM_001141727.1,100,100.000,60,5.18e-26	XM_021566584.1,100,100.000,60,1.77e-24	Bactericidal permeability-increasing protein (bpi)	gcacgaggttttTTTAACGCTCATCGCTTTTATTAGAATGTTTACAGTGTGAACAATGAAACAATGAATAAAACATGCCGCAAGAGGTACTGGATCAGGGTAAATAGGTCAGAATAGGCAACCGAAATTAATAATTAATGTATGTGTGTTATATTAAACATAGAGGAGGGAGTAAAATGTAGGCAAGCAATAAACATTTCAGAACAACTAGTAGTAGAATAAGACATGGGAGAGATGACACATTTTGGCAAAGAGATTTATTTATAGACTAATACACTTGAAACAAATAGCCAAACCGAAAACTGCAGACATTGCTGGTGCCTCCCCCGCGATCAAAATGACATCAAAAATAAAATGAAATGGAGCCTAACGTGATCTGAAATCTCAACTAGCAAGTCA…
CUST_14143_PI417904088	C073R102	IL12B	IL12B	-	Interleukin-12 subunit beta (IL-12B) (Cytotoxic lymphocyte maturation factor 40 kDa subunit) (CLMF p40) (IL-12 subunit p40)	IL12B	LOC106603888	XM_014198098.1,100,100.000,60,2.54e-24	XM_021624179.1,95,100.000,57,8.25e-23	interleukin-12 subunit beta-like (LOC106603888), transcript variant X2	gggggCATTATCTCATTATCAAGATGAACAGGTTCCTACACCATGTCCTGTATCTCATCCTTCATGTGGCATCAAGCAGCCAGTATGGGACAGAGACCATCGAGACTCTCATGCCAAATGTGAAGGTGGTGAAGGTGGATCTGAAGATCTTCACTGAGACGCAGGTCCCTCTGCTCTGTGGGGACTCCTATCAGGACACAGAGGTGATCTGGATGAAGGACAGTGAGCTTGCAGGACAAGGGAACCAGATCAAGGTGAAAGTGGAGGAGATGATGGGAGCGAACTACAGCTGCCACAACGCTGCTGGGGAGTACCTTAACCACACTCTGGTGCTGGTGCAGGACATACCATCACCCAACAGAACGAGACGCGTCCTGGAGAAGTCACATGACACAGATG…
CUST_5159_PI417904088	C179R097	CRYM	CRYM	-	Ketimine reductase mu-crystallin (EC 1.5.1.25) (NADP-regulated thyroid-hormone-binding protein)	CRYM	-	NM_001146485.1,100,100.000,60,5.18e-26	XM_021576206.1,100,100.000,60,1.77e-24	crystallin, mu (crym)	gggggacatttCAACAAAGTTGAACTTTTGGAATCGTATCACTGATTCATAAACTGTCTGCACGCTTGAGTTGAGCAAAAGCTTTAGCCACCATGGCTGAGCCACCCGTTCTTATACGACAAGATGAGGTTGAAGATTTGTTGCATTATAAAGATTTGATCCCGCGACTTGAAGTAGCACTGCGGAAGTTTTCCAAACTGGACAGCGCAGAAGTGATCCAGCCCGTTCGTACTACGGTCCCATTACAAAAATACAATGGATTCCTGGGGCTGATGCCTGCGTATTTGGTGCATGAAGACATCCTGTGCACAAAATTGGTGTGTTTCTACAAGAGGGAGAGTGGGTCAACTCTGTCATCAACTCAAGCCACGGTGTTGCTGTTTGATCCTGAGTATGGGA…
CUST_40864_PI417904088	C199R017	CD300LD	PIGR	-	Polymeric immunoglobulin receptor (PIgR) (Poly-Ig receptor) [Cleaved into: Secretory component]	LOC106598377	-	XM_014189421.1,100,100.000,60,2.54e-24	XM_021589990.1,100,100.000,60,1.77e-24	CMRF35-like molecule 3 (LOC106598377), transcript variant X2	atagcctcacatagtgacagTCTGGAACATGACTCCTCTACTCTTCTTCGCCTTCCTCCTCCTCTCTCGTCTGCCAGGCTCTCTCTGTAGGGTGACCACCGTGGGTGACCTGGCGGTCCTGGAAGGTCGGTCGGTGATGATCCCGTGCCATTACGGGCCGCAATACGCCAGTTATGTGAAGTACTGGTGCCATGGCAGTGTAAAGGACCTCTGTACCAGTCTGGTTCGCAGCGATGCCCCACGGGGGCAGGCTGCACCTGGAGAAGACAAGGTGGCCATGTTTGATGACCCGGTACAGCAGGTGTTCACAGTAACAATGACAGAGCTGCAGAAGGAGGACTCTGGATGGTACTGGTGTGGTGTGGAGGTGGGAGGAGTCTGGAGTGCTGATGTCACAGC…
CUST_12584_PI417904088	C227R036	NELFD	TH1L	NELFCD-NELFD TH1L	Negative elongation factor D (NELF-D) (TH1-like protein)	NELFD	-	NM_001140471.1,100,100.000,60,5.18e-26=XM_014167213.1,100,100.000,60,2.54e-24	XR_002474222.1,100,96.667,60,3.84e-21	Negative elongation factor D (nelfd)	ttggcagatatctgattactagcaagttagcttaggcaaaggctatctaaTTGTTTTGAAAACACACTCTGTATTGTTTTCTAAAGTATTAGCTAGGCCTGCTTTATTATAACTCGCCGTGTGCTTCACATTATAAACCCTACTCATTCTCTCGTCATCATGGACGAGGAATATTACGAGAGGAATATTGGAGACTGGGATGGTCCGGATGGCAATCAGGACGACTATGTTGAAGGGGAGAATGATGGGAAAGTTCAGGAGGACTGCCTACAGAAGTTCTCCAGCAGAGATTACATCATGGAGCCTGCTGTATTCAACACCCTTAAAACATATTTTCAGGCTGGTGGCTCCCCTGAACACGTCATCCAGCTCCTGTCTGAGAACTACTCTGCTGTGGCC…
CUST_12820_PI417904088	C022R023	SOCS1	SOCS1	SSI1 TIP3	Suppressor of cytokine signaling 1 (SOCS-1) (JAK-binding protein) (JAB) (STAT-induced STAT inhibitor 1) (SSI-1) (Tec-interacting protein 3) (TIP-3)	SOCS1	-	XM_014190655.1,100,100.000,60,2.54e-24	NM_001146166.1,100,100.000,60,1.55e-26	suppressor of cytokine signaling 1-like (LOC106599427)	gggggATGGGCTGAACGTTTATTTAGCTCCTTACCGAACACCATGGTGATCAAACCAACAAGGACAGAGAGAGAGAGAGGACGTGAAAAACTATGTGGATATATATACTATAAAGTCAGATTACCGCGTCTTGTCTCGACTATTTTGGAAGTGTATTGATGATCAACAACAGGATTAATACCGATGTAAAAAACGGATTCTGCTTCGGAAAATATAAAAAGTGCATCAGGAAAAAAAATTACATTGCACCCGTTTTGCAAAACGGATGCCAGGGAACTGTGTAGCGATGGGAGAGGGTTGGGACCGCTCTCCCCTGTAGGATGGTCGCTCACAGCACCGTGGAAGAACAAGACACAACATCAGCACCTTCATCATCATCATCATCAGCCTCATCCTCAT…
7_2_12_16	C216R105	GSTT1	GSTT1	-	Glutathione S-transferase theta-1 (EC 2.5.1.18) (GST class-theta) (GST-CL1)	GSTT1	LOC106585460	XM_014171685.1,100,100.000,60,2.54e-24	XM_021605686.1,100,100.000,60,1.77e-24	glutathione S-transferase theta-1-like (LOC106585460)	tgcaagacatctttctttaatatttttattaactaagaacattttctataaatgtcactttgttaatgtgaagcaagttgggtagataagcagggaaaaaatccactaaaatcatttttttccccttttttagatctacatcattttattaaggcagcaaaaggtgaaaactgtgcaagggatgtgtagactttcactaggcactgtaaatgaaatgggaagagtttgaagaatgttctttcaggttttggacttttgcatatctcataaaatagtactttacattctattgttaattgggcattttctttttagaactaaacctttttggaaaaatgggaagagtttaaagaattttctttcaggttttggactgcagaacctttgcatctctcacca…
CUST_22957_PI417904088	C155R129	ASTE1	ASTE1	-	Protein asteroid homolog 1	LOC106574784	-	XM_014150871.1,100,100.000,60,2.54e-24	-	protein asteroid homolog 1-like (LOC106574784)	TTGGCTCTTCACTAAGAAAGACATCACATCTCAGACAGAGCACACCATGGGCGTCCAGGGATTGACCAGGTTTATGGAGGAGAATGGAAACATTTTAAAAGATGTTCCCTTCAGAAACAGCAAGCTGATCATAGATGGTAGTAATCTGTTCCATTTGCTTTATTTTAACTCACGTTTGGATCAGAGTCATGGAGGGGATTACGATGCGTTTGAGGGCCAAGTCTGCAAGTTCTTTAAGGCTCTGAGAGACTGCGACATTGACCCTTTTGTGATTGTAGATGGGGGCTCCGACTACACCGACAAAAAGTTTGAAACACACAAAGAACGAGCTCAATCAAGGATCAACACAGCCAACAGCTTGTCCATGGGGCTTCAGGACAGGGGTGGTGTACTACCAAC…
CUST_19767_PI417904088	C038R129	MRC1	MRC1	-	Macrophage mannose receptor 1 (MMR) (CD antigen CD206)	MRC1	-	XM_014180754.1,100,100.000,60,2.54e-24	XM_021562981.1,100,100.000,60,1.77e-24	mannose receptor, C type 1 (mrc1), transcript variant X4	TTGGCCTGAATACACCACAGCCAGATCCCTCTCTCCTTTCTGGACTGGACAACCACCTTTTCGCCCTGGGATAGCAAACTATGCACTAGCTATGATGGAATCCAGTCCATCCCTCGCTGTGCTCCTGTGCCTTATGCATGCTCTCTGCTGCGCTGCTGAGATAGACAGCAGCTCCTTCCTGATCTACAACCAGGAACACAACAAGTGTGTGGTGGTGGTGAGCGCCAGTCAAGTCACAGTGGCTCCCTGTGACCACACGTCCCAGAACCAGCAATTCCGCTGGGCCTCGCAGTCTCGTCTCCTCAGCATCTCACTGAAGCTCTGCCTGGGGACTCAGGACCTGAAGGACTGGGTCAAGGTGCTGCTCTTCCCCTGTGATGAGAAGAGTGAGCTCCAGCA…
CUST_12120_PI417904088	C069R002	-	-	-	-	LOC106589505	-	XM_014179574.1,100,100.000,60,2.54e-24	XM_021575546.1,100,98.333,60,8.25e-23	uncharacterized LOC106589505 (LOC106589505), transcript variant X5	tactgacagttgtctctgtgtgaatatagtgtgtacccataatcctgtatgatcgtatcctttcagagcgccagcagacaGCAGGACCAGTGGAGGCGGTGTTGAAGATGTGGCCCCCTCCGGCTGAACCCACAGACAGCCCCAGCCATGGCCCCAGAGAGAGAGACCCAGAGAGGGAGATGGATGCAGGGAGAGAGGGTGTCCAGAGTCAGAGCCCCCGGGATGGCACAGCGGAGCACCATCCCAGCCACCTGCGTACCATAGAGCCCAGTCAGGATGTAGCAGTGGGAGCAGAGCAGAACGCAGACAGAGCTGTGGCAGATAGAGAGTCTGGAGGAGAGAGGCCCAACACTCACAGAGCCAGCCAGCACACTGCAGGAGGCCCAGACCAGCACAGAC…
CUST_25941_PI417904088	C206R065	ACAA1	NEFH	KIAA0845 NFH	Neurofilament heavy polypeptide (NF-H) (200 kDa neurofilament protein) (Neurofilament triplet H protein)	ACAA1	-	XM_014182810.1,98,100.000,59,9.14e-24	XM_021620008.1,100,93.651,63,2.31e-18	saposin-like protein 11 (LOC106591597)	ggggGGAATAACATGGGGTAGATTAGTTAGAAGGTGATGTGGAATAACATGGGGTAGATTAGTTAGAAGGTGATGTGGAATAACATGGGGTAGAATAGTTAGAAGGTGGTATGGAATAACATGGGGTAGATTAGTTAGAAGGTGATGTGGAATAACATGGGGTAGATTAGTTAGAAGGTGATGTGGAATAACATGGGGTAGATTAGTTAGAAGGTGATGTGGAATAACATGGGGTAGATTAGTTAGAAGGTGATGTGGAATAACATGGGGTAGATTAGTTAGAAGGTGATATGGAATAACATGGGGTAGATTAGTTAGAAGGTGATATGGAATAACATGGGGTAGATTAGTTAGAAGGTGATGTGGAATAACATGGGGTAGATTAGTTAGAAGGTGATA…
CUST_31799_PI417904088	C016R057	TRIM25	-	-	Stonustoxin subunit beta (SNTX subunit beta)	LOC106584582	-	XM_014170019.1,100,100.000,60,2.54e-24	-	E3 ubiquitin/ISG15 ligase TRIM25-like (LOC106584582)	AAAGTCATACCAATCTTACTTTAATTTGATTAATCTGACATCAATCACAAATACATATGAAGCCATGAGTGCTTGCCCATCTACTAATATAGACAAGCTGAAATTGATTGGTCAATATCTGGAATCAAAAATAAAAATAAAAAATAAAATTGTATTTGTCACATGCGCCATGAAATGCTTACAAGCCCTTAAGCAAAATATTGTCACTCCTTTTTAAACAGTGCAATGCTTTTTACAAAAGGATCTGGCACAGCATATTTAACAAAAATAAAGTGAGTAAAGCGCCAGTAGAGCAAGCGAAGGGTTAGTGTACCAGGACCATAACATGTTAGGAGGGCTTTGAGTGTTGTTAGACAATTGTCATACCTTTAGTGGCATATCTTTAGAGATGATCCTAAA…
CUST_25224_PI417904088	C092R126	RGS21	RGS2	-	Regulator of G-protein signaling 2 (RGS2)	RGS2	LOC106560302	XM_014123055.1,100,100.000,60,2.54e-24	XM_021604393.1,83,94.000,50,2.33e-13	regulator of G-protein signaling 21-like (LOC106560302)	GGGGGGATTAACTTGCTTGCTATAGTCAGGACTATATTCAGTGTTTCACCACAGAATCATGAGAGAGTGTGTTGTATCAGAAAGGGACATGGCGTGTACAGACTATATGAAGGAATCGGATTTCTCTATTGATACAAAAGGAATCAAGAAGAGAAACTGGAGGACAAGGATACGCTATCTTTTGAAGATCACCTCTTCTTCTTCAAAATGCATGGCAGGAAGATCTTACAGGCCAACAGTGGAGGAAGTCAACCAATGGGCACAGTCACTTGACAAACTCCTGAGTCACAAATATGGAAAGGCAGCGTTTCAGATATTCCTGAAGTCAGAGTTCTGTGATGAGAACATAGAGTTCTGGATGGCCTGTGAGGAGTTCAGGACCATCACGTCTCTAGGGAA…
CUST_21020_PI417904088	C006R123	PAPSS2	PAPSS2	ATPSK2	Bifunctional 3'-phosphoadenosine 5'-phosphosulfate synthase 2 (PAPS synthase 2) (PAPSS 2) (Sulfurylase kinase 2) (SK 2) (SK2) [Includes: Sulfate adenylyltransferase (EC 2.7.7.4) (ATP-sulfurylase) (Sulfate adenylate transferase) (SAT); Adenylyl-sulfate kinase (EC 2.7.1.25) (3'-phosphoadenosine-5'-phosphosulfate synthase) (APS kinase) (Adenosine-5'-phosphosulfate 3'-phosphotransferase) (Adenylylsul…	LOC106577008	-	XM_014154644.1,100,100.000,60,2.54e-24	XM_021611140.1,100,100.000,60,1.77e-24	bifunctional 3'-phosphoadenosine 5'-phosphosulfate synthase 2-like (LOC106577008)	GAGAATAAAATATTTATTTAAAATCTTGTCTGATACATTCATGTATGGACATATACATTGTTTATACAGTATTCCATTTGAGACAGTTTTCTGGTTTGATGCAATAAATACAGTTTTAATATTTTTTTCTATAAAATGTCATCCTTCTATAAAATGTCATTCTTCACACAATTTCTCCACTGACATTTTGAATCTTCACATAGACTTTACAGTTGGCTTACATCTTTCATACAATAGTTATTGATGATCATAATGCTATTTATGGTTCTTCATATCAAACTTCTTAGAAACATGAAGGGACATTTTATACAGTACAGCAGATAAACAGTGTTTACATTCTGAAGAAAAGGCACTTACGTTTGGAAGATGAAAAGCTTTGTTTGAAAATACAAGAAAAAT…
CUST_11094_PI417904088	C056R016	GSTT1	GSTT1	-	Glutathione S-transferase theta-1 (EC 2.5.1.18) (GST class-theta) (GST-CL1)	GSTT1	LOC106585460	XM_014171685.1,100,100.000,60,2.54e-24	XM_021605686.1,98,100.000,59,6.38e-24	glutathione S-transferase theta-1-like (LOC106585460)	tgcaagacatctttctttaatatttttattaactaagaacattttctataaatgtcactttgttaatgtgaagcaagttgggtagataagcagggaaaaaatccactaaaatcatttttttccccttttttagatctacatcattttattaaggcagcaaaaggtgaaaactgtgcaagggatgtgtagactttcactaggcactgtaaatgaaatgggaagagtttgaagaatgttctttcaggttttggacttttgcatatctcataaaatagtactttacattctattgttaattgggcattttctttttagaactaaacctttttggaaaaatgggaagagtttaaagaattttctttcaggttttggactgcagaacctttgcatctctcacca…
CUST_24461_PI417904088	C250R033	PIP5K1B	PIP5K1B	-	Phosphatidylinositol 4-phosphate 5-kinase type-1 beta (PIP5K1-beta) (PtdIns(4)P-5-kinase 1 beta) (EC 2.7.1.68) (Phosphatidylinositol 4-phosphate 5-kinase type I beta) (PIP5KIbeta) (Type I phosphatidylinositol 4-phosphate 5-kinase beta)	LOC106580411	-	XM_014161444.1,100,100.000,60,2.54e-24	-	phosphatidylinositol 4-phosphate 5-kinase type-1 beta-like (LOC106580411), transcript variant X6	ataggattCTCTATTTATAGTCTTACATTCAGTGATTAAAATATTTATCTTCAGCAAACTGTATATTTAATAAATTATAGTCAAAACCGACAGGTGTAATCAGAGTTCAGGATTTGTGTCAGATCATCTTCTCAGTCTAAAATGGAGGCAAACTACTGGTTAGTTAACAATACAGAGGACACACTCGTTCTTCAGTATCAAAGGATATCCTGAGAAATCTTCAGTTGACACCCCTCTATAAAATTAGTTTCTGTGCATCAAAAAATCTACCATAGTCCTTGTCTGTGCACATGTACTTATGACATACATAGGTGTGCATAATATAAACATTTGCATATTCCACAACCCAACGTTTGTCAAGGAAAAAAGTTATTAATCATAACTAACATCCAAAGTGCC…
CUST_5981_PI417904088	C236R062	IFI44	IFI44	MTAP44	Interferon-induced protein 44 (p44) (Microtubule-associated protein 44)	LOC106565178	-	XM_014132022.1,100,100.000,60,2.54e-24	-	interferon-induced protein 44-like (LOC106565178)	ATATTGATCATCTTCTTTATTTACTTACTAAAGTGAACACTTAAACGAAAACAATAAACGACAACCAACAGTTCTGTAAGGTAACCCAACTATACAGAAAGCAACCACCCACAAAACACAAGTGAAATGAACACAACTAAATATGGCCTCCAATTAGAGACAACAACAACCAGCTGCCTCTAATTGGAGGCCATTGCCAAAAACCAACATAGAAGTAGAATAAACATAGAAATATAAAACATAGAACAAAACCCCAAAAACATCAAAACACCCAAAACAAACACCCCCTGCCACGCCCTGACCAACTACAATGACAAATAACCCCTTTTACTGGTCAGGACGTGACAGGTTTAAAATTAGTTTCGGTCATCAAAAAAATTCGGTGAAGGATGCTAGTTT…
CUST_10229_PI417904088	C254R088	PPP1R37	-	-	-	-	-	-	-	0	AATTATGAAAATAAACGTTTCGCTAAGGAGGAGCTATGTGAGTGATGGTTCACATCACTCGGATAAAACACTGACTGAGAGACTTCCTGTGTTGAAACTTTACATCTTAAACACCACTGTGCTAAGGCCACCTGGGAGCGCTGGGGATATTGGTGTTTTCCTTTTAGGCCAGGAGGAGGACATTGATATAAACAGGTGGGTGAAAGTTTGAGTGAACACAAGGGTCCCTCTGTCTTATACCATCTTGGGACATATGCGAGCCTGAATGCCCAACACTGTGAACCTATGGGCCAGGTACCAAGGGCCCTATTCAACCGGTATCTAGAAGGTTCCAGGGTAAGGCAAAAAGGTGCTTTCTTACAGCGCAAGAAGAATACAGGTTTGTTTCAGCTGCGGGGT…
CUST_24031_PI417904088	C191R028	CHAF1A	CHAF1A	CAIP150	Chromatin assembly factor 1 subunit A (CAF-1 subunit A) (Chromatin assembly factor I p150 subunit) (CAF-I 150 kDa subunit) (CAF-I p150)	-	-	-	-	0	ttggccaggagggtggcgacccagagaagcagaaggtgcgtcagaagctgaaggcccgggagtgggatgagctgatggccAAGAAGAAGGTGAAGGTGCTAGAGGCTGTGGTGAGGGGCTGTGTGTGGGAGGGACAGGGTCCCCATCTGGAGCTCTTGCAGCAGTTTGCGGTGTGCCTGCTGGAACCCCTGCCCAAGCCAGAGCCCTCCACCCCAGAGGACAACACACAGAAACTACAACAGAAACTACAAGAAGATGAGCAGCGTGAGTACATTCTTATGCCTGGGGGAACATCATGCAGGTAAGCGGAGTTCTTTTGTCTCTGCAGTATTGTCTTTTAGAACCTTTTGGGCCTTAGCCTTGTCACCGCTAAGTGATCATCTGAGTCATGTTTTACTG…
CUST_6033_PI417904088	C152R005	AIF1	AIF1	IBA1 MRF1	Allograft inflammatory factor 1 (AIF-1) (Ionized calcium-binding adapter molecule 1) (MRF-1) (Microglia response factor)	AIF1	-	NM_001141568.1,100,100.000,60,5.18e-26	-	allograft inflammatory factor 1 (aif1)	ggggtccgctgcaccaccaatacttttttccctggctgtggtgtgtttgtgctttagcgagtgtacaacgaaaccagttcTGTGCTGATCCAGCGTGTGCTATCCCATACACAGAGCCAGGAGCAGCGTACCGCTTGCCAACATCCTGCTTCCACTCTGCGTTGATACCACTGCTTACGGCCGGGGGGAGTGTTCATGACACAACGCTCAGCAACCCCTGGTCCCTTTGACTACTCTATGATCCACCAAATAACAGCAGATTGACATGGACAAACATTTGCAAGGAGGGAAAGCATTTGGATTCCTCAAGTCTCAGCAGGATGAGAAACTGAACTCCATCAATGAGGCTTTTCTCACAGATCCTAAATATGCAGAGGAGGAGGACCTCAGCTCAAAACT…
CUST_24646_PI417904088	C151R122	RDH7	RDH7	RDH3	Retinol dehydrogenase 7 (EC 1.1.1.105) (Retinol dehydrogenase 3) (Retinol dehydrogenase type III) (RODH III)	LOC106575307	RDH3	XM_014151762.1,100,100.000,60,2.54e-24	-	retinol dehydrogenase 7-like (LOC106575307)	ggggggggccgagtttggtcttgagtAGTTTCTGAAAACTGTTACTTTGTTGCGCTGGTAAGGAACATCTCCAACAGTCCTAGACATGTTCCTGTACCTCCTTGGGCTGGTGGTGTTTTACTACCTGTACCGCTGGTTCCGGGAGATCCCCAGAGTCCCAGACAAAGGAGACAAATATGTCTACATCACGGGGTGTGACTCTGGTTTCGGCAACCTACTGGCCAGACATCTGGACGAGCTGGGTTTCTGTGTGATCGCATCCTGCTTCACAGAGAAGGGAGAGGAAGATTTGAGGAAGGCCTGTTCAGACAGATTCACCACCCTCCACCTGGACGTCAAAAAGAACGAGAGCGTCGACAAAGCAGCTGCTTTGATTAAAGACAAAGTTGGGGCTAGGGG…
CUST_343_PI417904088	C118R158	PIP5KL1	PIP5KL1	-	Phosphatidylinositol 4-phosphate 5-kinase-like protein 1 (PI(4)P 5-kinase-like protein 1) (PtdIns(4)P-5-kinase-like protein 1) (EC 2.7.1.68)	LOC106579975	-	XM_014160453.1,100,100.000,60,2.54e-24	XM_021621230.1,100,100.000,60,1.77e-24	phosphatidylinositol 4-phosphate 5-kinase-like protein 1 (LOC106579975), transcript variant X7	ggggggcactaggcccgctcatgtctgaaaaaggaagccgatcgctgtcatgaaaatgtgtatgtttttatctttacggtCCAAAATGCTATCCACACGCATATGAAAATGGTAAAAGCATAGGCTTCAAATATCTCCAATGATTTTCACTGAATTCAGATACTTCCCTTGTACAGCAAGGCATCAAAGCATAAAGGACAACACGAGGAAAGTAGGCTGGTAAGATGGATAAGAGGAGCGATCTGCGCCTGCGTCACTTTGGGACAGCCAGGCGAAGGCGATGGTGGGGTCTGAGGAGAAGATGGATTTACATTTACATCACATTTACATTTACATGGAGGATGCTAGGGGTGTTTAAGACCAACCAGGAACATGACTTATGCAGCCTCACCTGTCTTA…
CUST_26123_PI417904088	C143R078	IRF7B	IRF7	-	Interferon regulatory factor 7 (IRF-7)	IRF7B	-	NM_001171850.1,100,100.000,60,5.18e-26	XM_021573049.1,100,100.000,60,1.77e-24	interferon regulatory factor 7B (irf7b)	gggagcccacacatagaggaaattgctgtggaggactatgacattgacatccacagctctctcacctctacaggctacacCCCCCCAGGCATGGAGGTACAGCAATATTACATCTATATTGAACTAGGAGCTGGTTGTCCAATTCTGCCCTCCTAGAAAGCACTATTCTATTTATTCTGTTCTATTCTCACTTGTTTAGTATTTTTTGAGGACAAATTCATTATCAAACCATTTCAAATCTGTGAATGTATTTTTTTCTCCAAACAGCATGATAATCTACTCAAGCTTGTGAACACCTTAGACCTGAACCAACATACTGGTACAGCACACCTCCCACCTGTAGAAAGTCAACCCCTTACAATGGGTTGTTTATTACTCACACACAAAAAGTATATTTTT…
CUST_15887_PI417904088	C110R168	FCGR3	FCRL5	FCRH3	Fc receptor-like protein 5 (FcR-like protein 5) (FcRL5) (BXMAS1-like protein 2) (mBXMH2) (Fc receptor homolog 3) (FcRH3) (moFcRH3) (CD antigen CD307e)	LOC106589967	-	XM_014180437.1,100,100.000,60,2.54e-24	XM_021595464.1,100,100.000,60,1.77e-24	uncharacterized LOC106589967 (LOC106589967)	cagaatgGAACTCACACCACTCTGCTGGCAGCTCTTGCTGTTGAGTACACTGGTATACTGTAGCCTCGGACAAGGTGGAGATCTCTCTCTTCCAGCCTCTCTGAGTGTCAGTCCTGACAGATCTCAGTTCTTTGAATATGAGTCTGTCTCTCTGAGCTGTGAGGTTCAGGGGAACTCTGCTGGATGGAGAGTGGTGAGGAACACATCGAGAAGAATCCTTTCAGAGTGTGATACTGACTGGGGAAAACAACAAGGGTCTTCATGCACCGTGTCACTAATACCATCAGACAGTGGAGTGTACTGGTGTGAGTCTGGGTCTGGAGAACACAGCAATGCTGTCAACATCACAGTACCTGCTGGAGCTGTGATCCTGGAGAGCCCTGCCCTTCCTGTGACTGA…
CUST_8700_PI417904088	C111R039	NRXN1	-	-	-	NRXN1	-	XM_014180048.1,100,100.000,60,2.54e-24	XM_021575406.1,100,100.000,60,1.77e-24	neurexin 1 (nrxn1), transcript variant X16	tacATAAAGATAACCCAACTCCAAACATTTCCGACAATGGATGACGAGTGAAAGAAAAGAAAAGAGATCATGGCAAGGCAACAGTAAAGAAGGAAGTGAAAGGATAAAGATGGTACGTTTGTTTGAGGAATCAGCCAAAGTATTTGCACTTTTTATAGTGGCAGTAATGGCCCAAAGCAGACTAATATAAAAAATGGCCGCCCGATCTGTTAACAGTGCAAAGACAAAAGGGCCTACGATTAATCTTGATCTTGAGAGACTTATGTCAAGTTCTATTCAAGATTCATCTTTGCCAGTTAAGAATTCTGGACGACTTGGTTTTCAACATCAGTGTGGAATCTAAGGCAATGTGTTTAACAGAATTCTGGAAGGAGAAGTCAGAACGTTCTGAACGCGATC…
CUST_3744_PI417904088	C015R021	CYB5	CYB5A	CYB5	Cytochrome b5	LOC106590088	CYB5	XM_014180637.1,100,100.000,60,2.54e-24	XM_021563077.1,100,100.000,60,1.77e-24	cytochrome b5 (LOC106590088)	GGCCCCCCCTCGAGTTTTTTTTTTTTTTTTTTGGTTTTGCAAAAATAATATTTAATCAGTGTGATAAAGTTAGGCATGTGACAAATTAGCATACGTTGATGGTTTAATACCCACTGTGTACCACTGCACAATTGTTTATGGTAAAATTAGACAACTGTAACACTTTTATTAATCATTTTATTGAAAAAAAAAATGGCTGCTGTACAATTACATTTGATTGGACTGTCGATTAGAGAATTCAGTGGTGAGCTTCTTACACACATTAGCAGCAAGTAGGGACAACCAGGATATTTTCCATTTCAAAAAACACATTGTATGGTTCAAGGGAAGTCACATGGGGTCAACTTAATCCCCACTTAGTTGTTGCACAATGCAAGCTTTTGGCCTACTTGGTCTATG…
CUST_5421_PI417904088	C068R110	ENP2	ENTPD2	CD39L1	Ectonucleoside triphosphate diphosphohydrolase 2 (NTPDase 2) (EC 3.6.1.-) (CD39 antigen-like 1) (Ecto-ATP diphosphohydrolase 2) (Ecto-ATPDase 2) (Ecto-ATPase 2)	ENP2	-	NM_001141635.1,100,98.333,60,2.41e-24=XM_014128472.1,100,98.333,60,1.18e-22	XM_021590991.1,100,95.000,60,1.79e-19	Ectonucleoside triphosphate diphosphohydrolase 2 (enp2)	ccaaactctcttgccttcactgccaaatcaggcagcgcacgcactgtggatttcatctgaaaaaagagcaccgctcaattTTTAACAATGGCAAAGCGACGCTGTCATATTTTCGCCACGGTTGCGCTATTACTGTTTGGGATTGTAGCCATTCTCCTTCTAACTATTCCCACGGATGACTTGACCGAACCTCCGGAATTTATGTATGGGATAGTCCTGGACGCAGGCTCCTCTCACACAGCCATGTACATCTACAAGTGGCCGGCAGACAAGCAGAATGGCACGGGTGTGGTCACTCAACACACTGAATGCCACCCCAAGGGTGGAGGAATCTCTAGCTATGCGGGACAGCAGCGAGAGGCAGGGAGAAGCCTCCAGTCTTGTCTGGACCAGGCCACC…
CUST_6024_PI417904088	C254R084	FAM168A	-	-	-	LOC106567592	-	XM_014137101.1,100,100.000,60,2.54e-24	-	protein FAM168A-like (LOC106567592), transcript variant X8	ggctttttGGGAAATATTTTAATAGTTATTGAATGTTCTACATCGTACAGTAAGTATTATACAATTACAAACTTGCCTTGTCACCAGGACCACTATCCGATCCTCATTAGAACGACATACAAACAAAAACAGATTTACACTTCATATACACAAGTCTGATGTGGGTCTTTGCTTCAAGAACGTCCCAACCGCATGTTATAAAACGTTCTGCCAGCATTGCTGCAACGTAGTGACAGAACATAGCAAAGACTCTGGGGGCCATTAGTTGGGAAGTAGTTTTAATCTCAAGGTGCTGACTCTTATAAAGTCGGTCTTAAAAATAGATACTTTTTTTGGGAAGAGGAGTATACTTCCCTCTCTCGAAATTAGTGTTCAAATCAAAAGTTTGACAAGGCCGAA…
CUST_17806_PI417904088	C145R061	DUSP2	DUSP2	PAC-1 PAC1	Dual specificity protein phosphatase 2 (EC 3.1.3.16) (EC 3.1.3.48) (Dual specificity protein phosphatase PAC-1)	LOC106580476	-	XM_014161591.1,100,100.000,60,2.54e-24	XM_021621846.1,100,96.667,60,3.84e-21	dual specificity protein phosphatase 2-like (LOC106580476)	CAAGAGGTAAAGACAGTTTAGTACTGATTTCGAGGTGAATTGTTTATGGAAATAGTCATATTCAGTACTCTCTGGCTGAAGTCAAATTGTTTGAATTAGTTGATCAAGTTTTAAATATATTCTGATCAAGAACAAGTTTGTTTTGACAAACATTTTGTTGCTTTTAGGCTAGTCTATAACTTTCCACAGGAGAAACAAATCAAAGCGTAATTTTTTTTACCTGTTTATTTTTGGGACCAGAACTAAATAATGTGTTCAAGCAGCGAACCTCTGGAGATAACTGGTATTGAGTTGGCCCACATCCTCAGAACTCCCCGGGACCAGTTCGCCTCAGGCGGCTGTGTACTGCTGGACTGTCGGCCTTTCCTTGCCTTTTCCAGGACTCACATCTCTGAGTCC…
CUST_7506_PI417904088	C046R038	IFI44	IFI44L	C1ORF29	Interferon-induced protein 44-like	LOC106573920	-	XM_014149381.1,100,100.000,60,2.54e-24	-	interferon-induced protein 44-like (LOC106573920)	gaaatgttttaatgtcagtgacattttgcaagtctactgataaagatcaaattaaatgaagtcacccaggaccaataccaGTTTCTTTTTTTCAGCAGCAGCTGTATACTTTCTTTTCCTCTCTCTGTCACAATCTAAACTGGACTATTATATTGAATTCCTGTTTTCATATAGGAGATACAAGTTATGTATTGGGAGAGGGTATTATTTGCATTTCAGCGATGGAGCTCTTGTCTTCCAGCAACGTAATTTGAAAGAAGCGGTGAGGCCCCGAAATAAAATATTCTCCGGCTGTTTTGGAGACTCagaGTGCTTGTGTTCCTTCTCTCGGGTGAGGACAGTGAATCACACTGCATTACGCAGTAAGACCTCTGTCACCTGTCTGGAAGGGACATGGTG…
CUST_22034_PI417904088	C245R027	RET7	RBP7	-	Retinoid-binding protein 7 (Cellular retinoic acid-binding protein 4) (CRABP4) (CRBP4) (Cellular retinoic acid-binding protein IV) (CRABP-IV)	RET7	-	NM_001141457.1,100,100.000,60,5.18e-26=XM_014133715.1,100,100.000,60,2.54e-24	XM_021569930.1,100,98.333,60,8.25e-23	Retinoid-binding protein 7 (ret7)	gggggaccatgggACATCCTTGAGACTTTAAATCTCTTAATTCTAACAACTGCTGTCTATTGAAGGTTTGAGACTGCCACGCAAGTATCCACCTTGCCTACCAACTACAGTGGCACATGGGACATGACTAGTAATGAAAACTTTGAAAGTTACATGGTTGCTCTTGGCATTGATTTTGCAACACGCAAGATTGCAAACATGTTGAAACCTCAGAAAGTGATTGAGCAAGATGGGGATTCTTTCATCATCAAAACATTCACTACCTTCAAAAACTACACAGTCTCATTCAAGATTGGGGAAGAGTTTGAGGAGGTGACCAAAGCCTTGGATAACAGAAAAGTCCAGACGGTGGTCAACTGGGACAATGATAAACTGGTGTGTGTTCAGAAGGGAGAGAAG…
CUST_913_PI417904088	C146R045	LRP4	-	-	-	-	-	-	-	0	GGGGACATTTCAATTGCGCTGTAGTGCGGATCTTCAGCATTACGGATTGAGTTTAGCCCTTAGATTAACATTGTTTTGTACTGTACAATCTGTCATGGAAATGCAGAGGGTGGGAAATAGAGCATTTCTCTGGACAGATGTCAGTTTGAGTTCTCAAAACCATGTATCTTGAAGTAACTTCAAGTTCAGCAACATGCTGATTTGCTGCTAGACAGGAATTCCACAGCACTGATGCCAATGAGAGAAGGTCTTGGCAGCTATTTTACCTGAGGTCTCTGATGGTTGGATCACAGACGCATCAATCTGACCAATGCTTCAATCATTAACTACGCTAACACACAGAATCCCACCCACTCAGCGAAGGTTTCTAAGCTGTACAGGTTTTACCATGCATTTTAA…
CUST_20772_PI417904088	C148R063	FCGR2B	FCRL5	FCRH3	Fc receptor-like protein 5 (FcR-like protein 5) (FcRL5) (BXMAS1-like protein 2) (mBXMH2) (Fc receptor homolog 3) (FcRH3) (moFcRH3) (CD antigen CD307e)	FCRL5	-	XM_014191295.1,100,98.333,60,1.18e-22	NM_001165147.1,83,100.000,50,5.61e-21=XM_021595889.1,100,96.667,60,3.84e-21	Fc receptor-like protein 2 (LOC106599962)	GAAGAAAATCATTTATTTCATTCTATATGCTACAAAGACAAAAGCAATATCTTACCTGGATGATTCATTGAAAAATTATGGTTTTACACAAAACAACCACAATAAAACAAAAGGCCTACATTAGTTTCATGTTTAAATCAAATAATGATGAACAACTATAGAGACCAAAATGGGGAAAATAAAGTAAATAATTATAATAATTGAATTCTCCTCTCTTGTATGTTTTCTAACTCTGTAACATGTAACGGTAAAACATTATACTGAACCTGTAACAATAATGCCTGAACCACAACACCTATCAGTTTATCTGTATAGACATGAAAAGTGAAGGCATTTACAATGTATCAACCATAATGCTATACAGTATATGACCAGTATATGACTGATGTTAAAGGACAG…
CUST_348_PI417904088	C154R022	DF-5	DFNA5	GSDME-DFNA5 ICERE1	Gasdermin-E (Inversely correlated with estrogen receptor expression 1) (ICERE-1) (Non-syndromic hearing impairment protein 5) [Cleaved into: Gasdermin-E, N-terminal (GSDME-NT); Gasdermin-E, C-terminal (GSDME-CT)]	LOC106597029	-	XM_014188268.1,100,96.667,60,5.50e-21	XM_021620029.1,100,95.000,60,1.79e-19	non-syndromic hearing impairment protein 5 homolog (LOC106597029)	GAGCATGGGGAAATTATTTATTACACTTTGGATGGGGAGTCAATACATCCAGTCACTACAAAAATACAGGGGCCCTTCCTAACTCAGTTGCCGGAAAAGAAAGAAACCCCTCCTcaatCTCTCTCCTTACACTAAAAAGGCCAGGCCTTTCACAGTGATACTCATGACTAGAGGAAGGTATCCAGGCTGGTCCTTCATCTCTGTCCTCAGTGTGTCCTCCTCTCTCTTCAGTGTAACTTTAAAGTGACCAAAAAAACTCTCTGTCCTCCCAAACACCTCCTCCGTCAAAACagcCagaCCTGCATCTCTCAAAAAAAGGGTCTCCCCACTCCCTGCTGCCACATGCTGCACCAggaTCTGCAGGGCCTGTAAAaatGGAGGACTGCAACAGGGTCCCAA…
CUST_33418_PI417904088	C219R007	MMP13	MMP13	-	Collagenase 3 (EC 3.4.24.-) (Matrix metalloproteinase-13) (MMP-13)	MMP13	-	XM_014215041.1,100,98.333,60,4.25e-22	XM_021588256.1,100,95.000,60,6.42e-19	collagenase 3-like (LOC106613110)	GTGGGGAGTCACTGAGCTGGATGCCACCAAGACAAGACAAGATGGAAATCACATATTTACTGCTCCTTGTGGTGGTTGCTCAGTCATTTGCTATGCCTCTGTCATCGCTGGAGGAGACTGATAAGTGGCTATTAGCTGAGAAATACCTTCGCAGGTTCTACAACCTTCGAGCTGGACTTCAGGGAACAAAGACCCACAGGTCTTCAGATGCCATGCATGCTAAGATCAGGGAGATGCAGTCCTTCTTCAACCTCCAGATGACGGGGAGCCTGGACGCTAACACCCTGGAGCTGATGAGCAAGGCCAGGTGTGGTGTCCCTGACGTGGGGGAATACAATCACTTCCCCCGACACCTCAAATGGCAGAATACCAATGTGACCTTCAGAATAGTGAATTATA…
CUST_41653_PI417904088	C261R136	HSBP1	HSBP1	-	Heat shock factor-binding protein 1	LOC106570227	-	XM_014142324.1,95,96.491,57,2.56e-19	XM_021560322.1,100,100.000,60,1.77e-24	heat shock factor-binding protein 1-like (LOC106570227)	gggggagctcaaagctagaacatctcgggaaaagtcagaaaattcagcaacagaaactaattggagttttaaattatacaAACAGTAGCAGACATGTTGTGAAACATTGAAACTGTTGCCAAGAACGACCCGCAGCGTCAGGGACGCACAGCTTCAAAGACAAATCCCATTGATTTTGAAACGACAGCTGAATCAGGATGACGGAATCCAACTCAAAAGCTGCAAAAGAATTGACAGAAATTATGGAAGCGACTATGCAGAATCTTCACAGTAAATTTCAAAGCATGTCTGACCAGATTGTTTCAAAAATGGATGACATGGGGACTCGAATTGATGACCTGGAGAAGAATGTTGCCGACCTCATGACCCAGGCTGGTATGGATGAGCAGCAGACTCCTA…
CUST_20156_PI417904088	C141R064	PLCC	AGPAT3	LPAAT3	1-acyl-sn-glycerol-3-phosphate acyltransferase gamma (EC 2.3.1.51) (1-acylglycerol-3-phosphate O-acyltransferase 3) (1-AGP acyltransferase 3) (1-AGPAT 3) (Lysophosphatidic acid acyltransferase gamma) (LPAAT-gamma)	PLCC	-	NM_001140138.1,100,100.000,60,5.18e-26=XM_014151227.1,100,100.000,60,2.54e-24	XM_021608926.1,100,98.333,60,8.25e-23	1-acyl-sn-glycerol-3-phosphate acyltransferase gamma (plcc)	TCTTTTTTTTTTTTTTTTTTTTTTTTTTGGCAACCAAACGATAAATGTTTTATTGTTTATAACAATCAGTATTTCTGGGATCTACAAGCAATTCAGAAATCAACTCAGGCCCAAGCCTGGCTTTATATTAACATTAAATACTGCATTTTATTGGTGCGAGGTTGGCCGTCACGTGTGTGCTTTTCTGGGAAGGACGGGAGGAGTAGCAGCATGCTCAATCTCGTTTGTGTCAGAATTCAGCACAAGTTTCATGAGGAGACAGACAAACAAATAACAGGATGTGCTCAGAGGCGTTAAGATTCCTTCACCTCCACACCCAACCTTCATGGGGGTAAGGGTGGGGACCTAAAGCATGCTGGGAATCTGTCTTCTCCAGACAGTAGAGCCCCTTGCTGAAAT…
CUST_889_PI417904088	C087R091	RTN3	RTN3	-	Reticulon-3	RTN3	RTNT3	XM_014155629.1,100,100.000,60,2.54e-24	XM_021615315.1,98,98.305,59,2.97e-22	reticulon 3 (rtn3), transcript variant X2	gggggagtgccctccatccacacagtgcttGGTACATGCGCGTGAAGGTGCACAGGCTCGGTGACACTGCGTCCAGGTCTTGGGGAATACGAGGCAAGTTGGAAGAAGACATTTTAAGGACAGCAGTAATACACTACAAATTCTCGCCGCCACCGTGCAGAATTTTTTGAAATTATAGTAAAATGGCAGATCCAATGACCCAGTCCGCCCAGATATCATCGTCGCAGGGGCTGGCCGATGGACAAAACTCTGTTGCGGCCAAAGACTCAAAAATGTCCGTCAAGGACTTGGTGCACTGGCGAGACCCCAAGAAGTCTGGCGTGGTGTTCGGCCTGTCCCTGCTGACGCTCCTGTCCCTGGCGGCGTTCAGCGTCATCAGTGTGATCTCCTACCTGCTCC…
CUST_29882_PI417904088	C007R016	MAP7D1	MAP7	-	Ensconsin (Microtubule-associated protein 7) (MAP-7)	LOC106583045	-	XM_014166879.1,100,96.667,60,1.98e-20	-	MAP7 domain-containing protein 1-like (LOC106583045), transcript variant X12	AGAGACTGGAGAGGAAAAAGCGTCTCGAGCAGATCATGAAGAGGACGCGCAAGACAGACGGAGGGGAAAAGAAAGACACCAAGTCCCCACCTCCTTCCCAAGCCAATGGCAAAGAGGCCGAGAGCAGCAAAGCCTCTGCTGACTACCAGCCAAGCCCCGAGATCAACAAGAATACAGAGAACGACCATAGTGGTGAGAGAGACAGCTCCACGGTCCATGTGGTCAACGGTGTCCAGCCAGCCAGTCACGAGAATGGCCTGCCTAGCAAGGGGGACACCGCACACTTTGAGGAGATCATCCAGCTAGCCAATCAAGGCAACAGCAGCAATGGGGGGCGGGAGAAATCAGAGAGTGACATGCCCACTGAGCCAATCCTGGCCTTTGAAAGTGATGAGCCCT…
CUST_25380_PI417904088	C049R033	RADIL	RADIL	KIAA1849	Ras-associating and dilute domain-containing protein	LOC106606937	-	XM_014203426.1,100,100.000,60,2.54e-24	XM_021625490.1,100,95.161,62,4.96e-20	ras-associating and dilute domain-containing protein-like (LOC106606937)	gatgttgtggtaaaccaatcacggagcccgctctgtttgagcagttcggccgtctgcaggacttcatccgtagtctccccCCCAGTCAAACAACACAGCAGGCACTCAGCGGGACAGCTACAGACGCCAAGTCTGCGACCTCACGCTCCTCGCCCTCTGTCACAGTGGTGGTCCCTGACCCAGTTCCCTGCCCCTCGCTCAGGGCAGAGGTGGACTCTTTGAGCCCTGCGGCGCCCCCTCAGGCCCGGGGGTCTCATGGTGACCTAAGCTGCTGCCTTGCAGAGGCAGAGCTGTCCCACAAGCTGAAGAGTCTGGAGCTGCAGAACACCCTACCTAGGAGTGGCCAGGCTGACCTGGGATGCCACAAGAGCCTGGCTCTGGACCCCTCCTGCCTGCTGA…
CUST_2760_PI417904088	C068R030	MAF1	MAF1	-	Repressor of RNA polymerase III transcription MAF1 homolog	MAF1	LOC106578620	XM_014157633.1,100,100.000,60,2.54e-24	XM_021620663.1,100,98.333,60,8.25e-23	repressor of RNA polymerase III transcription MAF1 homolog (LOC106578620), transcript variant X3	aatgcaataaagtgtgttttctgtaattccatgtccaattttttcacaataaatgagaacaagtcgattttcgattttcaaattcagaaaccaaaaacgaaaataagtcaatttattacgttctatgttgtcttttgaatcaaataactactgaaCGGACGATAGACAGACCGGGTCGAGTAGTGGATTTATTCGGTTTACATCGTTACTGTTGTGTTTTACTTTCAAGTAATCGGTCTGGCTAACGACAAATAGCACAGGGACAATTCGAAATAGACAGAAGTGCAAAATCGGTTAGAAAAGGCGACTTGATCGGACAGAAACCGTAACGTTACTAACGTTAGCTAGCTAATCTCTGTCAAATTATATTGGTCAAAAGGGATGCCGCTGAAATCCAAA…
CUST_18956_PI417904088	C206R147	SMIM24	-	-	-	SMIM24	-	-	XM_021603977.1,100,100.000,60,1.77e-24	small integral membrane protein 24 (smim24), transcript variant X2	TCGTGACAGTGAACAGGTTTTACACAACACCAACCTCAGAGGCCTCCTGGGATAAACAAGGATTCATAATGTCTCTCCACAAAACTTTCCAGGTCTGCTTATTACTGTCTGTTTGTGTTAACCTGGCCCAGAGTGGTATGCCAAACGGAGGCTTACGGCTCACTACATCCAAGGGTGGGACCCTGCAGCCTTGGCTTGTTGGTCTGGCTGCTGTAGTGGGATTCCTCTTCATCGTCTTCGTCATCCTTATTGTACAAAGGCTTTTCTTCAAGAAGGAAAAAGAGGAAGATGGTGGTTGGTATGAGAACACAGCTGTAGGAATGGAAGCTGGAGAGGCCAGTGAGGTTAAACAAACCAGCCTATAGAGAGACCAGCAAACAAACCATCCAGGGAGGGGAA…
CUST_5524_PI417904088	C122R168	RSPRY1	-	-	-	RSPRY1	-	XM_014149014.1,100,100.000,60,2.54e-24	XM_021597248.1,100,98.333,60,8.25e-23	ring finger and SPRY domain containing 1 (rspry1)	GCGTTTAAGTTCTTTATTGCAATCATGGACTGTAAATGAATTTCCCCTTTTCTGGCCCATGATAATGCAGCATACATATCATGTAATTCATTCTGACTGATGGGTTTAGTTGTGAATGTAGCCCATGGCTAAATCATGTCAATAATAATGGCATCTTTGACAAGCAACAATATAACATTAAAGTAACTGTCCAGTGAAAATCTCACTTTTAAAAGTTCATATTCTAACTCATTCCCAAATAATGTTATAACTCATCCTATAATCGTATTTGTAGTCAAAGTATACATTGGAGAAAAAACACAAACCCGATTGTTTCAGAAACGCTTGATGGGGGATGAGCTCCCATGAATAGTTTTAATGACCTGTTTACACACACACCATTCTGTTGTTGGGGTACTC…
CUST_11383_PI417904088	C112R131	FBXW5	-	-	-	LOC110509778	-	-	XM_021590876.1,100,96.667,60,3.84e-21	F-box/WD repeat-containing protein 5-like (LOC110509778), transcript variant X2	ggggcaggaccctgtctttcaaagataattcgtaaaaatccaaataacttcacagatcttcattgtaaagggtttatacaCTGTTTCCCATCCTTGTTCAATGAACCATAAACAATGAATGAACATGCACCTGTGGAACGGATGTTAAGACACTGACAGATTACAGACGGAAGGCAATTGAGGTCACAGTTATGAAAACTTAGGACACTAAAGAGGCCTTTCTACTGACTCTGAAAAACACCAAAAGAAAGATGCCCAGGGTCCCTGCTCATCTGCGTGAATGTGATTTAGGCATACTGCAGGGAGGCATGAGGACTGCAGATGTGGTCAGGGAAATAAATTACATTGTCCGTACCTTGACTAGATTCCTTCAGAGACGTTCAGGGCCTGTTGCATGTA…
CUST_7104_PI417904088	C004R046	FASN	FASN	FAS	Fatty acid synthase (EC 2.3.1.85) [Includes: [Acyl-carrier-protein] S-acetyltransferase (EC 2.3.1.38); [Acyl-carrier-protein] S-malonyltransferase (EC 2.3.1.39); 3-oxoacyl-[acyl-carrier-protein] synthase (EC 2.3.1.41); 3-oxoacyl-[acyl-carrier-protein] reductase (EC 1.1.1.100); 3-hydroxyacyl-[acyl-carrier-protein] dehydratase (EC 4.2.1.59); Enoyl-[acyl-carrier-protein] reductase (EC 1.3.1.39); Ole…	LOC106610271	-	XM_014209537.1,100,100.000,60,2.54e-24	XM_021581290.1,100,96.667,60,3.84e-21	fatty acid synthase-like (LOC106610271), transcript variant X2	GTTAGTGAGAGCTCTTTATTTGGACTAATACAATAAATACAACTAGAGGAGCACACCGTCAATTTCCTCCTCCTTTTTACTGCAGCCAATCACAGGGCTCAACACAGTCACCTGACTCTTCATAGACCTGATTAGAAGTCTCAGAAGTCAGGTCAGTGTGTTGCATTCTGGGATTGGACCCAAGATCTTAGAGGACCTTTAGGGGACAGCAAAGATCATGGGAGTCAAAAACAGATAGAGGTATAAAGTTGCCTGGTAACCACAGATCTACAATAGGATCAGATTACCCTCCCAACAGTCCTAACGGGAGGACAGTAAAATATCTGTTTCTGGACTAGTGGTTAGGGGTCAATTCTACCTACTCCTCAACAAGGCCCGTTCTTCAGATCAATGATTCCA…
CUST_41596_PI417904088	C161R062	RXRG	RXRG	RXRGA-nr2b1 nr2b3a rxr rxra rxrg	Retinoic acid receptor RXR-gamma-A (Nuclear receptor subfamily 2 group B member 3-A) (Retinoic acid receptor RXR-alpha) (Retinoid X receptor alpha) (Retinoid X receptor gamma-A)	LOC106568909	-	XM_014139718.1,93,100.000,56,4.25e-22	XM_021613030.1,100,100.000,60,1.77e-24	retinoic acid receptor RXR-gamma-A-like (LOC106568909), transcript variant X3	acgaaggccctggcaactcgacaaatGACCCAGTCACCAACATCTGCCAGGCAGCAGACAAACAGCTGTTCACCCTGGTGGAGTGGGCCAAGAGGATTCCTCACTTCTCAGAGCTGCCCTTAGACGACCAGGTTATTCTACTACGAGCAGGCTGGAACGAGCTCCTCATCGCGTCCTTCTCACACCGCTCTGTCACGGTGAAAGACGGAATCCTATTGGCCACGGGTCTCCACGTCCAGAGAAGTAGTGCTCATAGTGCCGGAGTGGGCTCCATCTTTGACAGAGTGCTGACGGAGCTGGTGTCTAAGATGAAAGACATGCAGATGGACAAGACTGAGCTGGGCTGCCTCCGAGCCATCGTCCTCTTCAACCCAGATGCCAAGGGCCTGTCTAATCCTA…
CUST_24349_PI417904088	C027R023	GULP1	GULP1	CED6	PTB domain-containing engulfment adapter protein 1 (Cell death protein 6 homolog) (PTB domain adapter protein CED-6) (Protein GULP)	GULP1	LOC106575714	XM_014152370.1,100,100.000,60,2.54e-24	-	PTB domain-containing engulfment adapter protein 1-like (LOC106575714), transcript variant X5	ggggggaagagagacggaacagaGCCGCTCATGAACGAGAGAGCTGGGCGACAAGGAGACCGTACAAAACAAGGAATCTTTCACTTCATTTGGAAAGAGGGAACTGATGAGTCAGAGGGGAGGTTAGATGAGTGACAGACACTACTAGTGGGTTCCAGTTCCAGACACACAAATCCAAATCAAGAAGGCTCCTGATCCACTGCAGAGCCCTGGTCTCAGTACCACCAGAGAAGCCATCGCAGTATGAACCGAGCTTTCAACAGGAGAAAAGATAAATCTGGAGGGATGACACCCCCCGAGGCTTTGGCCAAGAATCACATGGCTTACAATGTCAAGTTCCTTGGCGTAACAGAGGTTGACCAACCAAAAGGCACAGATGTCATAAGGATTGCAGTGAGA…
CUST_5439_PI417904088	C117R148	IFI44	IFI44L	C1ORF29	Interferon-induced protein 44-like	IFI44L	-	XM_014149381.1,100,100.000,60,2.54e-24	XM_021565212.1,98,100.000,59,6.38e-24	interferon-induced protein 44-like (LOC106573920)	ccctactgagaccaacgtgatccccaacatgaaccccaaactgacccaggaacaggagaaacggctgtgttctttactggGAAACGTCAAACTCAGCCTGCTGTTCAAGGCCAGTATATATGGCTACACAGGAGCAGCCTTTCACCAGAAATGTGACCACCAAGGTCCCACAGTCTCTGTAGGATATAACTCCACAGGGTTTGTTTTTGGAGGCTACACAAGTAAAGATCATGATGTAGCCAAGCAAGGCCAGTACATACAGGATGACAAAGCCTTTTTGTTCAGTTTAACTGGTAGAAATCCTGTCAGGTATCCTGTCACAAATGCCCAATATGCGGTCAAAATGCATAACACAACTGGCCCTTACTTTGGGGAGGCTTTGTTGTTAATGAACGCTAA…
CUST_37184_PI417904088	C223R097	MUC3A	MUC3B	-	Mucin-3B (MUC-3B) (Intestinal mucin-3B) (Fragments)	LOC106577892	-	XM_014156323.1,100,98.333,60,1.18e-22	XM_021614663.1,100,100.000,60,1.77e-24	mucin-17-like (LOC106577892), transcript variant X2	CACCACCAGGAACACTGTCAGGACACCAAATATCACCAGGACAACCCCGGCAGTTATACTGGTTCCGGCATATAACCCAGCCTTGTGGATCGGGTGGTTACAGTCAGCCAGGTACCAGATAGAGTTTGTGTTTTTACAGTTGCATGACAGTCCGGCTCTGGTTACTTCACAGATACCGCTGTTGCAGTTTTTAGTGTTATTATGTCTGGGGTCACATGCCGTCAAACAGAGCAACTTCCCGTCTTTACTGTAAGGCTCAAAGTATTTAGCAAAATCAAGGTTGATTGTTTTCTGACATACAGCTTTCTCATCAAGTGGCGTTTCTTGTGGTTTCTTCACTGACTCAACAGTAAACGTGGGACATCCTGAGCGAAGAGCTGAACACAATGTCAGATTTTC…
CUST_24689_PI417904088	C040R163	TXN2	TXN2	-	Thioredoxin, mitochondrial (MTRX) (Mt-Trx) (Thioredoxin-2)	LOC106607030	THIOM	XM_014203576.1,100,100.000,60,2.54e-24	-	thioredoxin, mitochondrial-like (LOC106607030), transcript variant X2	cacactccaaataTAGAAAACCTTTAATATTCTTTATTTATTCTCTTGGTCATATTACATAGTTTATTGAAATAAAATCTAAATCGAACCCATATATCCATATGCGTTTCCCGCTTATCTCAAATTTCTCAGTCAAAACCAAGAGACAGACCGGTACAGACTGAGAAACTCATACACAGATACATCCATACAGACACATTCCACTCTCACATTAGGCATAATGGTGGAAAATGACCGTGCAGCCTACAATGCTAGGGGAAGGCCGCCCTCGAGTGGACTAAAGAAGGAACTGCAAAGAGAGACATCACAGCTCATTCACCAATATCACATTTCCTGTTAACGTCACTGCCCACTTAATACTAAACGACTTGTCCCTGTACAGCAGTGTAGTCGCCCATC…
CUST_1568_PI417904088	C076R064	TGFBI	TGFBI	BIGH3	Transforming growth factor-beta-induced protein ig-h3 (Beta ig-h3) (MP70) (MP78)	TGFBI	BGH3	NM_001140391.1,100,100.000,60,5.18e-26=XM_014213300.1,100,100.000,60,2.54e-24	XM_021583240.1,100,98.333,60,8.25e-23	transforming growth factor beta induced (tgfbi)	ttgGGCCAACAGAATAAAGGGAAAAGGCCAAGATGCAGCACTTAACTTTATTGACTTTGGCGCTCACCTTGATTGCAACGATTTGTTTTGCAAAGTCACCCTATCAATCAGTTCTTCAGCACAGCAGAATAAGAGGCAGACAGCATGGACCCAACGTGTGCGCGATGCAAAAGATACAGGGGACCGACAAGAAATATTTCACCAACTGCAAACAATGGTACCATCGCAAGATCTGCGGCAAGCCAACGGTGATCAGCTATGAGTGTTGCCCCGGTTATGAGAAGCTTCCAGGAGAGAAGGGGTGTCCTGCTGCCTTGCCGTTAGTGAACATCTACAACACGCTGGGTGTGGTTGGAGCCGCCACCACTAAGATGTACTCAGAGAGGGCTCAGCTGAGGG…
CUST_19242_PI417904088	C059R028	-	-	-	-	-	-	-	-	0	AGCGTAATCCTTCCTTTATTAAAAGATAACCATGCTTACCAGAATGTTTTCTTACTGACTAAACATACAGCAAGCTATGCTATCCATCTCTGCACCAGTGTAATAATGACAGCATATTGTAGTTGGAGAGAGAGGGTACAGAGGTAGACAGGGTTTGCTCTGTCTCCCCCTCTCACAAGGTCTCTATCACCCTCTCCTCTGTCCCTCCCCGTACCCCTCTCCCTCTTCTCATCCTCTGGTTTATCATCAGTCAGTCCAGGGAATGTGAAGAATGTGACATATGCGCATCCTCCTGAAAGTGATGGTATGACTGGACTGGATAAGGGTTTTGGATAAAAGCCGTGCCCCAATAAATATTTCCTGGTGTTAAATATTTGGTGTTTTCACGGATGAAATCTT…
11_3_4_14	C144R032	PEPE	AAD-A	-	Alpha-aspartyl dipeptidase (EC 3.4.13.21) (Asp-specific dipeptidase) (Dipeptidase E)	PEPE	-	NM_001141091.1,100,100.000,60,5.18e-26=XM_014174656.1,100,100.000,60,2.54e-24	XM_021598651.1,100,98.333,60,8.25e-23	Alpha-aspartyl dipeptidase (pepe)	gggggatgcacggccggctatgtACTGCTAAAGTAATCTTTGAGGTGTAGGATGAGGTAGCCTATTTAACCCTGAGTGAGTTGTAAACTTTGATCAAAACCTTGTCTTGAAAGATATGAAGAGGAGACTTCTGCTCGTGTCCAACTCAACCCTGCACGGGGGTGGATATCTGGAACATTGTCAACAGCAGATCAAAGACTTTTTCGGAAAAGGTGTGGCGAGGATCTTATTCATCCCCTATGCACTGTGTGATAGAGATGGCTACGCAAAGACTGCCAGGGACAAGTTCAACAGTTTGGGTTATGAGGTGGACAGCATACACGAGGCCTCTGACCCAGTGGAAGCTGTAAGGAAGGCTGAGGGTATATTTATAGGCGGTGGCAACACATTCCGTCTGCT…
CUST_36199_PI417904088	C256R055	ADGRG5	GPR97	ADGRG3-GPR97 PGR26	Adhesion G protein-coupled receptor G3 (G-protein coupled receptor 97) (G-protein coupled receptor PGR26)	LOC110506390	-	-	XM_021585977.1,100,98.333,60,8.25e-23	adhesion G-protein coupled receptor G5-like (LOC110506390)	GGGGACACAGAGGAGAGCGAAGGACCAGTCCACTGCAGTCCATCGGGGTCTGGCCATGGCACTGTTCCTTCTTAGCCTCCTCTTCTTCCTGACAGGGACTGTGGCCAACGTGGGAGGTAACAAGGCATGCTGGGTTTTTGGGGCGGCTCTCCACTATGCTCTGCTCAGTTCCTTCTCCTGGATGTTTATTGAAGTGTTACACACCTTTTGGTTGGTCTACATGGTGTTCAGCCCCTCCCCCAATCCGAATGTTTGGCACCTGGTTGGCTTTGGTCTCCCAGCTGTTCCGGTCATTGTACTGCTTGCCATCGGAAAAGCCTATGGTGTGATAGAGGTTGTGTCCAGTGAGGATGTCAACAACCCCTACTTGATGTGCTGGATGGATGTGTCTCCACACTC…
CUST_4377_PI417904088	C184R132	MFS11	MFSD11	-	UNC93-like protein MFSD11 (Major facilitator superfamily domain-containing protein 11)	MFS11	-	NM_001173595.1,100,100.000,60,5.18e-26=XM_014193773.1,100,100.000,60,2.54e-24	XM_021625423.1,100,100.000,60,1.77e-24	UNC93-like protein MFSD11 (mfs11)	ttggattcaaagactatttttaagctagacgggagaaaagggtcgtagtctagtacattattgttggattctttctaggaTTTGAGTCCATCTGGTATCTCCACAAGTCGTTATTGGTTTGCTAACTATGTAGCTTGCACAAACAAGGACTATACAGTGCAGCACCCGACTCGGTCAATTGTTCTCTTCTCAAGTGGCTAAACAGACAAAAATGAGCTGTGGACCCCTTCAGAGGTTTTTTAACTAACCCATTTCGTCAAGTAATATTACAGTGACACCCTGCAGCAAGCATGGGTCCAGAGGGAAAGACACTATTGAACATCATAATCCTGGGGTTTGGATTTATGTTCATGTTCACTGCTTTCCAAACATGCGGCAATATAGAGCAAACTGTGATCA…
CUST_9570_PI417904088	C076R150	CB5LP	-	-	-	-	-	-	-	0	ACACTTTAAATTATTTTATTGAAAAAACAAAAATGGAAGATGTACAAATACATTTGAGCAGCTGTAGTACATTCAGTGGTGAGTTCCCCTGCCTTCTAACACCCTAGCAGTTTAAAAGCAGGGACAACCATGATATTTTACCATTAAGAAACACATTGTACTGGTCATGAGGCCAACTTAATCCCGATTAAAATGGCTCCCAAAGTGCGAGTCTACACAGCAGTCACTTAAAATCAGTGCAAGCATGTGGCCTTCTCTATGGAACATTGAGACCCATGTCACCAGAAATGTGGGACCATTGGGTTAACAGTTTTGCATACTGGGTTTTGGGACCATTTGGTTCACAGTTTTGCATATGTTAAATGCAAAGGTCGGATGTGAAGCACATAAGATATTATA…
CUST_2771_PI417904088	C003R132	ADA2	CECR1	ADA2A-cecr1 cecr1a	Adenosine deaminase 2-A (EC 3.5.4.4) (Cat eye syndrome critical region protein 1 homolog A)	LOC106609445	-	XM_014208295.1,100,100.000,60,2.54e-24	XM_021577207.1,100,98.333,60,8.25e-23	adenosine deaminase CECR1-A-like (LOC106609445)	gggggacaatggtattgtgagcccatcaactcagactaaatagcATAGTACTGGGGTAGTTTATTGAGAAAGGTTTGTACACTTGAGAAGGAAAAAGGGAATAAGGGAAGGGTAGAATACTTTGCTTCTGTTGCTTTTCATTTTATTCAGTTGAATGAGTGGCCTCAAGAAGGATTTCCACAGCTGGTTCTTCCAACCTCCAATGACACTGCAGAACAAGGTGGTTTTGCCCTCTAGAGGGAGGTATACCATCACCCTCCAGTTGGCAGCTGTGATGTGCTGTGTGACAGTATGCGGCGGGACCCCTGACCCCCGTCAGAGGGAGACGATGATTCACCAGGAGGCCTCCAGGCAGACAGGGGGTCGTGTGCAGCTGACAGGTGCAGAGCAGCGGCTCGA…
CUST_9358_PI417904088	C046R025	SDR	-	-	Uncharacterized oxidoreductase C663.09c (EC 1.-.-.-)	LOC106560815	C-FACTOR, CSGA	XM_014124142.1,100,100.000,60,2.54e-24	XM_021570530.1,100,100.000,60,1.77e-24	C-factor-like (LOC106560815), transcript variant X2	ctcatttctcaacacttttGTGCACAACTTTTATTTCAGCTACCATCAGACAAACTCCTACTATGCGTAATAGGGGAAATAACAGAGGATAAATGTTATTTTCCAGGATACTGCATGTTACTATATTTTCTAAAGACACAAATAAATTCTCTTCGTTACTATTGCTAACACCAAAAGTTTCATTGGAAAAGAGAGCAGTAACATTCATTATCCTTTCAGACTTAACAGTGGGATATTTCTTCATAATAACTTAAGGAAGTGCCAGAACACTCACTGCTCGGAAATTAAACAATATCATTTAATATCCTCTTAGAGGTTTACAAAGATGTCTGGGAAGATACTTATCCTAAGCTGAAAGAACAACTTCCTTCAATGACAAACAAAAGACTGTCCACTATT…
CUST_22674_PI417904088	C236R043	MX2	MX2	-	Interferon-induced GTP-binding protein Mx2 (RBTMx2)	MX	-	NM_001139918.1,100,100.000,60,5.18e-26=XM_014133087.1,100,100.000,60,2.54e-24	-	Interferon-induced GTP-binding protein Mx (mx)	tgtacagccagtagtcagttgcagtgtagtcagttgcagttgcagtgtattaaccattttttttttatcgcaaatcATGAATTATACGCTGAACCAACATTATGAGGAGAAGGTGCGTCCTTGTATTGACCTCATCGACTCCCTGCGCTCCCTTGGCGTAGAGAAGGACCTTGCGCTGCCAGCCATCGCGGTGATAGGGGACCAGAGTTCAGGGAAGAGCTCCGTGCTGGAGGCGCTATCTGGGGTGGCTTTGCCAAGGGGGAGTGGTATTGTAACACGATGCCCTCTCGAGCTGAAGATGAAGAGGAAGAAAGAAGGAGAGGAATGGCACGGAAAAATCCGCTACCAAGACCGTGAGGAGGAGATTGAGGACCCCTCTGATGTGGAGAAGAAAATTCG…
CUST_19551_PI417904088	C111R139	ABCB5	ABCB1	ABCB1B-Abcb1 Mdr1 Mdr1b Pgy1 Pgy1-1	Multidrug resistance protein 1B (EC 7.6.2.2) (ATP-binding cassette sub-family B member 1B) (P-glycoprotein 1) (CD antigen CD243)	LOC106574003	-	XM_014149503.1,100,100.000,60,2.54e-24	XM_021598143.1,100,98.333,60,8.25e-23	multidrug resistance protein 1-like (LOC106574003)	cattcagatgagggccatggcaggccacgcctccaaagaccagggtgccctggagcagtctgggaagatatctactgagaccgttgaaaacttcaagacagttgttggattgacacgggaggacgtcttCTTTCACAAGTTCATGGACAGTCTAGAAAGACCATACCAGAACGGTTTGGTGAAGGCCCCCATCTACGGACTAACATTTGCCGTTGCCCAAGCAATCCCTTACATGGTCAATGCTGCAATCTTCCGCTTTGGGTCCTGGCTTATTGCTCACTGTCACACAGAATATGAAAATGTTTTCCTTGTGTTTTCTGTGATCATATTTGCTGCCATGAACATAGGAGAATCAGCATCTTTTGCTCCTGACTTTGCCAAAGCGAAAGCAGCTGCAGG…
12_1_18_4	C028R009	ADPRH	ADPRH	ARH1	[Protein ADP-ribosylarginine] hydrolase (ADP-ribosylarginine hydrolase) (EC 3.2.2.19) (ADP-ribose-L-arginine cleaving enzyme)	ADPRH	-	XM_014173511.1,100,100.000,60,2.54e-24	XM_021597319.1,100,96.667,60,3.84e-21	ADP-ribosylarginine hydrolase (adprh)	accattggaAaaatGATTTATTTATTTTCCCTTTTGTACTTTAACTAGTTGCACATCGTTGCAACACTGTATATAGACATAATATGACATCTGAACTTTTGTGAGTGTAATGTTAACTGTTCATTTTAATTGTTTATTATCTATTTCACTTGCTTTGGCAATGTAAACATATGTTTTCCATGCCAATAAAGACCTTATATTGAAATTGAATTGAGAGAGAGATGGAGAGAAAAAGAGAGAGAGAGGAGGGAGTTTCAAGAGTGATTTGTTAAGTTACATTGCCACCCTCTGGTCTCCACCGTACTTGTAGTCTTCATTTTGAAGATGTACACAATAATGTCAATCTAATCTGAAGTAAAGCAATCCGTTTTTACACTCTGCCGTCGCTAATGTGCTACA…
CUST_12590_PI417904088	C124R055	GRN	GRN	-	Progranulin (PGRN) (Acrogranin) (Epithelin precursor) (Granulin precursor) (Proepithelin) (PEPI) [Cleaved into: Paragranulin; Granulin-1 (Granulin G); Granulin-2 (Granulin F); Granulin-3 (Epithelin-2) (Granulin B); Granulin-4 (Epithelin-1) (Granulin A); Granulin-5 (Granulin C); Granulin-6 (Granulin D); Granulin-7 (Granulin E)]	GRN	LOC106601556	XM_014193860.1,100,100.000,60,2.54e-24	XM_021625509.1,100,96.667,60,3.84e-21	granulins-like (LOC106601556), transcript variant X2	TTGGCATTGTCAAGGAGCGCGGACACCTGTAAAGTCACTGAGATAGAGATGCAGAGGTATCTGGTGCTCTGTATGGCCCTGCTGGCCCAGGTCTCTGCTGATGACTGCCCAGGAGGAGAGGCGTGTGAGGAGGGCAACACCTGCTGCAAGGTCCCCTCCGATGGCTATGAATGTTGCCCAATGTATCAGGCTGAGTGCTGTGAGGATCATATCCACTGCTGCCCTGAGGGAACACTCTGCGTTGTGAATGAGTCCATGTGTGTGAATGGAACTGTCTCCCTACCATGGGTGGAGAGAGTCTCTGCTAAACAGTCCATATATCCTAAATCTTTCAGAATGATCAGTGCAAATGCCGGGGATGAGGATGATAACATCTGCCCTGACAAGTCCCACTGCCCC…
CUST_15466_PI417904088	C103R166	PPARB	-	-	-	PPARB	-	XM_014167444.1,100,100.000,60,2.54e-24	XM_021608232.1,100,98.333,60,8.25e-23	peroxisomal proliferator-activated receptor beta1A (LOC100136532), transcript variant X1	AACCAATGTTTTTTAATCAACCATTTATAGGAAGTTCTATACCAAAGGTAGAAATCCTATACTTTCCCTCAGACGGTTAACACCAGGTGTTTATACAGATGTTAAATGCACAGTATTGCTGTGGTAGACCGTAGAATATTTCAGACCTGTGCTGTTGTGCTCATAACATTTGTATGCAGAAATAAAATCATTAGACAACAATTGATTCAAAGAAAAATGTACACAATTTAGCTTTTTTCTCATGCAGCAGTACTACTTTGCTGACATTTCTTTGTAACTTGTTCTATTCAGTAACTGAAAAGTTAAAAAAAAATCCCTAGAAGTTTATGAACACATCAAATGTGTAATTATAACTACCCACAGGCGGTCCATGACAATGACATTTCTAGGGGCACCAGA…
CUST_19756_PI417904088	C140R012	PLCD3	-	-	-	LOC106607244	-	XM_014204017.1,100,100.000,60,2.54e-24	XM_021625920.1,97,100.000,58,2.29e-23	1-phosphatidylinositol 4,5-bisphosphate phosphodiesterase delta-3-A-like (LOC106607244), transcript variant X1	ctcagttggtagaaaagcactatataaatccaatcaattattataactttttttactattacagaattttatagaagcatTTTTTCAGGGCAAGACTTGTAGTTGAGCTCCTTTTTCCAGGACAACAATAGTGTTATATGACTAAATTTCATCGGTAAATGAAGTCTAGTTGTTGTGGTATTGGTCTGTCACGCCTGGCATGACACAGTCCAAAATACTGAGTGAATGCCTAACCTTAGTGACAAAATGAATACATTTCAACACTTAATGTTTCTGTAATGTGTTTGCAACAAATTGTGTTTGTTGCAATTGATGAAACACACTTCTTTCAGTGTGCAATTTCTGATAGGAGTTTTTAGATTATATTTAACATTGTTGTAAAATGTTATAGTCTAATGT…
CUST_12447_PI417904088	C047R085	TBC1D15	-	-	-	LOC106605609	-	XM_014201444.1,100,100.000,60,2.54e-24	XM_021624925.1,100,95.000,60,1.79e-19	TBC1 domain family member 15-like (LOC106605609)	AATGTCCCACAGTTTATTACATTTAACCCTTATACAATAACAGTCCATACATACAATGACAAGCCTGTCCCTCCAACATGCGGAAACCTATTCTTCACTCTCTAACTTGCAGGGCGAGGAACTGAAATGTCAAGCAGCTATACATCTGGAAATAATCCTCTTCCTCACTGGTGGCCTTCGTTTGTAAAACA*TTTTTTATTTATTGCTCCAAACCCAATTATACTCAGAATTACATGTTCACTCCTATCTGCCTAAAAGCACTGGACACCTGAAAGTGACATCTCCTTCAATGGAAATTTTCTGGATCAGAATAAAACAGAATAAATAAATCACAATATTTAATCACCAACAAACTAACCCACACACATGATATCAAACTTTCACTAAGCAAGATTGTG…
CUST_30334_PI417904088	C195R081	LSS	LSS	-	Lanosterol synthase (EC 5.4.99.7) (2,3-epoxysqualene--lanosterol cyclase) (Oxidosqualene--lanosterol cyclase) (OSC)	LSS	-	XM_014164267.1,100,100.000,60,2.54e-24	XM_021579227.1,98,96.610,59,1.38e-20	lanosterol synthase [2,3-oxidosqualene-lanosterol cyclase] (lss)	AACCATACAAAATGACTTTATTCTGCATTTTAAAATAAGATTTAATAACAAATCAATTACATCAATACATTTTCAGAAACTACGGTTGATATTAATAGGCAACATGGAAACATTTGTATTTCAGCACTATTTACAGATTGATTTACGGGCTCGATTTTAATGTCATAATACATACAGGTGCCAAAATGATACCCTTATTTCTCACATAGCAGCTAAAAGGTTTGTTTCAAAGACTTCAGCCCCACCAAAATGTAAGGCAAGAGGAATGTTAAAATAGCAGGCAAGGTAAGGTGATCCCAAGGTTGAGGTCTTTTCAGGACTCACCCAGTAGAAGACTTGAAAAACTTTCATTCAATTCACTTTTACGACCAGGGCTGGGGAGGTTACTTTAGAAATGCA…
7_2_10_2	C199R149	ABHD14B	ABHD14B	CIB	Protein ABHD14B (EC 3.-.-.-) (Alpha/beta hydrolase domain-containing protein 14B) (Abhydrolase domain-containing protein 14B) (CCG1-interacting factor B)	AB14B	-	NM_001141848.1,100,100.000,60,5.18e-26	-	Abhydrolase domain-containing protein 14B (ab14b)	gggggagtAGACTGTTTTTCCGTTGAAAAGTGAAACTACTAAGACAACTTAGTTCAGACAGAAGCCAGTCAAGACGGCGTGAAGGATGTGTGCTGCTAAAATGACAGAAGGGAGCTTGCATGTGGGATCCTGCAAGGCACCTATGTTTTACAGACAAGCTGAACCGGCCACAGGTGAAGTCCATCTGTCTGTCCTGCTTCTGCACGGCATCCGTTTCTCATCTGAGAACTGGCTCAATATAGGAACACTGGAGACATTGGCCAAAGCTGGCTATCGTGCAGTGGCCATCGACCTACCAGGTTTTGGCCAATCTAAGTCAGCAGTAGCCCCCTCTGCTGTAGGAGAGCTGGCCCCTGGTGGGTTCCTGAAGCAGGTGTGTGAGGCACTGGGGATGGGGCC…
CUST_17050_PI417904088	C156R091	IER5	IER5L	-	Immediate early response gene 5-like protein	IER5	LOC106570852	XM_014143424.1,100,100.000,60,2.54e-24	XM_021601733.1,100,96.667,60,3.84e-21	immediate early response gene 5-like protein (LOC106570852)	TCTTTTTTTTTTTTTTTTTTTTTTTTTTTTTTTTTTTTTTTTTTTTTTTTTTTTTTTTGTTTTAAAATTTTTATTAAGATTATAAATTCTTAACAAATATGTTCTAAAACAGTTTTACCCGGTGATATACAATTTAATATGCACAAAAATACAAGAATAGCAACAAAATATGGAGAGGACGAGTGAAAGACATCTTTATTTCAGTACACATAGTGCTTATAATGTGTGGATGTATGGCAAAATTATGAGCTTGCCTTTTTAGAACAAAAGGTCTTAACATTTTTGAAAACAAAACTCACAAAACCAAGCCATGTTGGCATCATGAATTACTGTGAAGGCTTGATCAGTAACTTTTTGTTATAGGTTCAGGGGGAACGCTCAACAGATCGAACTGTCAAA…
CUST_10180_PI417904088	C078R126	NELFD	TH1L	NELFCD-NELFD TH1L	Negative elongation factor D (NELF-D) (TH1-like protein)	LOC106583261	CATZ	XM_014167213.1,100,100.000,60,2.54e-24	XR_002474222.1,100,100.000,60,1.77e-24	cathepsin Z-like (LOC106583261), transcript variant X2	ttggcagatatctgattactagcaagttagcttaggcaaaggctatctaaTTGTTTTGAAAACACACTCTGTATTGTTTTCTAAAGTATTAGCTAGGCCTGCTTTATTATAACTCGCCGTGTGCTTCACATTATAAACCCTACTCATTCTCTCGTCATCATGGACGAGGAATATTACGAGAGGAATATTGGAGACTGGGATGGTCCGGATGGCAATCAGGACGACTATGTTGAAGGGGAGAATGATGGGAAAGTTCAGGAGGACTGCCTACAGAAGTTCTCCAGCAGAGATTACATCATGGAGCCTGCTGTATTCAACACCCTTAAAACATATTTTCAGGCTGGTGGCTCCCCTGAACACGTCATCCAGCTCCTGTCTGAGAACTACTCTGCTGTGGCC…
CUST_8856_PI417904088	C044R169	CD302	CD302	-	CD302 antigen (Type I transmembrane C-type lectin receptor DCL-1)	CD302	-	XM_014164142.1,100,100.000,60,2.54e-24	-	CD302 molecule (cd302)	cgtgggggacgacatgttttctgttgtcttgctttttgtttagttttgtatgttgtttcccggaagttagagggtgttaaaagtttgggATTTCCCCCTTTTGTTTTCTGAGTACAGTAGTGGGCGGCAACAGAAATTCCTTTGAGGAGATAGGAAACTCCATTGGAATCATATTAACGTCCACTGTGTACCTTTTCTCGTTCGTAATATCTCTGGCGGCAATACAACTTTTCAGGAAGTAGTCCGTCCTAATACCACACCGAAGAAGAACATTTTGGAGCCATGATTTGGAGCTCGCAAACATGGAGTCACTGAAGAAATGTCGTCTTTGCCCCATATATTTATGCAATTTCCTTTTTGTTTTTGTTTGTTGGCAATATACTCTAGCTGGTGACTGTC…
CUST_8317_PI417904088	C057R106	GRN	GRN	-	Progranulin (PGRN) (Acrogranin) (Epithelin precursor) (Granulin precursor) (Proepithelin) (PEPI) [Cleaved into: Paragranulin; Granulin-1 (Granulin G); Granulin-2 (Granulin F); Granulin-3 (Epithelin-2) (Granulin B); Granulin-4 (Epithelin-1) (Granulin A); Granulin-5 (Granulin C); Granulin-6 (Granulin D); Granulin-7 (Granulin E)]	GRN	LOC106601556	XM_014193860.1,100,100.000,60,2.54e-24	XM_021625509.1,100,100.000,60,1.77e-24	granulins-like (LOC106601556), transcript variant X2	TTGGCATTGTCAAGGAGCGCGGACACCTGTAAAGTCACTGAGATAGAGATGCAGAGGTATCTGGTGCTCTGTATGGCCCTGCTGGCCCAGGTCTCTGCTGATGACTGCCCAGGAGGAGAGGCGTGTGAGGAGGGCAACACCTGCTGCAAGGTCCCCTCCGATGGCTATGAATGTTGCCCAATGTATCAGGCTGAGTGCTGTGAGGATCATATCCACTGCTGCCCTGAGGGAACACTCTGCGTTGTGAATGAGTCCATGTGTGTGAATGGAACTGTCTCCCTACCATGGGTGGAGAGAGTCTCTGCTAAACAGTCCATATATCCTAAATCTTTCAGAATGATCAGTGCAAATGCCGGGGATGAGGATGATAACATCTGCCCTGACAAGTCCCACTGCCCC…
CUST_16403_PI417904088	C098R014	PECR	PECR	-	Peroxisomal trans-2-enoyl-CoA reductase (TERP) (EC 1.3.1.38)	PECR	-	NM_001141052.2,100,100.000,60,5.18e-26	-	peroxisomal trans-2-enoyl-CoA reductase (pecr)	CAGTGTAAAGGGTGTTTATTGTAAGGCAGAGTTATGTTTCTTTATGAGACAAGAATTAGTAAAAACATTATGGTTCATATTCAACATTCTTCGGCATTATTAAAACACTAATAACAGCCAATAATCAGGAAAATTGTCACAGAGGCCTATTACCATGTTAATAATATCTGAATTATCTACAATTATGTACAGTACATGAGATACAGGGCGACACAGTCACACAGGGCGATACAGGGTCACACACGGCGATACAGGGTCACACACGGCGATACAGGGTCACACATGGCGAGGCTGATAGGACGAGAGCAGAAAGATAGAGTTCAGTCTCTATATTGACACCGACCCTTCCATTAATTCATACTGATCGCATTCTGATCAGCGTTCTCAAAAACAATTCTC…
CUST_15917_PI417904088	C212R143	-	-	-	-	LOC106569469	-	XM_014140845.1,100,100.000,60,2.54e-24	XM_021613846.1,93,98.214,56,1.38e-20	uncharacterized LOC106569469 (LOC106569469)	ttggGTCACAGTGTGTGTCAACACGCTTTCTTCTGACACTTAACGACATCAAGCCCAAACCAAGGAGTATATTCAGCGAAACACAAGCGGTTTGCAATGGTGCAATGTTTGGTGTTCACACTGCTCTGGGTTTGTGCTGTGGCACTGCATTCCCTTGGGAGTACAAAGAGAGTATCTCAAACGACTGAGCCAAGTGTCTCTAGGAGCACAGACCCGACGGCTGAGACAGTTACTTTAGGACCAGTTGAGACCCAAAGCCCTGATACACACACACACCAGAGCCTAGTAGAAGAACAAGAACCACTTCCCTCAGACCCCTGTCAGGATGACGAGTTTGATAAGAGGGTGTACCAGAGAGATTCTAATGGTGTTATGCAGCTGATTCAGGGAGAGGACTAC…
CUST_27858_PI417904088	C011R012	NDUFB8	NDUFB8	-	NADH dehydrogenase [ubiquinone] 1 beta subcomplex subunit 8, mitochondrial (Complex I-ASHI) (CI-ASHI) (NADH-ubiquinone oxidoreductase ASHI subunit)	NDUFB8	NDUB8	XM_014187377.1,100,100.000,60,2.54e-24	XM_021614820.1,95,94.737,57,8.31e-18	NADH dehydrogenase [ubiquinone] 1 beta subcomplex subunit 8, mitochondrial-like (LOC106596057)	ggggaagcagtggtatcaacgcagagtggccattacggccGGGGGACCGCAACAATTGAACATGGCTGCCGTGGGGTTCAGAAATTGGGCTCGAGCTCTTTCCAAAGAGAAACAGCCAGGCTTCTCGGCGCTTTTCTCCCAAGTCAGAGCAGCCTCTGGACCTTCCAAGGGCATGCTGCCAGGGCCATACCCCAAGACGCCCGAGGAGAGAGCAGCTGCAGCAAAGAAGTACAACATGAGGGTGGAGGATTATGAACCAATCCCGGATAATGGCGAGGGATATGGAGACTACCCACTATTGCCAGACAGGTCCCAGCATGAGAGAGACCCCTGGTATTCCTGGGACCATCCAGACCTGAGGAGGAACTGGGGAGAGCCGATCCACTGGGATTTTGACAT…
CUST_26903_PI417904088	C061R124	USP46	USP46	-	Ubiquitin carboxyl-terminal hydrolase 46 (EC 3.4.19.12) (Deubiquitinating enzyme 46) (Ubiquitin thioesterase 46) (Ubiquitin-specific-processing protease 46)	LOC106560265	-	XM_014122974.1,100,100.000,60,2.54e-24	XM_021601420.1,97,100.000,58,2.29e-23	ubiquitin carboxyl-terminal hydrolase 46-like (LOC106560265)	ttggatcaacctgacgcaacttcgtgtgtttactattcactcatctgttattttagataaattatacggtagtagtctgcGATAATAAAGTGAAAACAGCGTTAAATGTTGCTTTATTTTTTATTCCGTGCTGATTGGTCTCTGGTCCAAACATTCATTGCCTGTTTTTTACGCCTGGGTAGTGGGGTTGAAGTCTGGCCTCTAGCTGCGGCTGCGAATTAGATGAATCAGTATCGTCCTGCATTTGAAACATTTTTATTTTATAAATATGACGGTGAGGGGGACCCTGTAAACTAAATGACTGTCAGAAATATCGCCTCCATTTGTAATATGGGCACCAATGCCTCTGCTCTGGAGAAAGACATTGGTCCGGAGCAGTTCCCAATCAACGAACACTAC…
CUST_9180_PI417904088	C121R040	LICH	LIPA	-	Lysosomal acid lipase/cholesteryl ester hydrolase (Acid cholesteryl ester hydrolase) (LAL) (EC 3.1.1.13) (Cholesteryl esterase) (Lipase A) (Sterol esterase)	LICH	-	NM_001139859.1,100,100.000,60,5.18e-26=XM_014178868.1,100,100.000,60,2.54e-24	XM_021575755.1,100,96.667,60,3.84e-21	Lysosomal acid lipase/cholesteryl ester hydrolase (lich)	ttggacaaaagcagtagggagcctctgacgttttatcacgctgcagctcctgtgacttcctcttcatttggccaacaaagAATACAGCATTATTATTCTACACAACAGAAGTTGTCCGGACTGAAGATGGTGTGGGCACTACTTTTAATAGCCTTCCTGACCACTGGGGCGGTCCAGTGTCAGAGATCCTTGCTGAAAGACAAAAAAGGACTGGACCCAGAGGTCAACATGAATATTAGTGAGATCATCAGGCGTTGGGGCTACCCGGCAGAGGAGCATGACGTAGTCACAGAAGACCTCTACATCCTCAGTGTCAACAGGATCCCGCATGGCCTGAAGAACAGTAAAGATCCCAAGCCTGCAGTGTTCCTCCAGCACGGTCTCCTAGCTGCGGGGAGT…
CUST_38104_PI417904088	C245R068	PLOD3	PLOD3	-	Multifunctional procollagen lysine hydroxylase and glycosyltransferase LH3 [Includes: Procollagen-lysine,2-oxoglutarate 5-dioxygenase 3 (EC 1.14.11.4) (Lysyl hydroxylase 3) (LH3); Procollagen glycosyltransferase (EC 2.4.1.50) (EC 2.4.1.66) (Galactosylhydroxylysine-glucosyltransferase) (Procollagen galactosyltransferase) (Procollagen glucosyltransferase)]	PLOD3	LOC100196315	XM_014155217.1,100,95.000,60,2.56e-19	XM_021617039.1,100,100.000,60,1.77e-24	procollagen-lysine,2-oxoglutarate 5-dioxygenase 3 (LOC100196315)	GCTTAGCGTGGTCGCGGCCGAGGTACGAGACCAGGGAGTGTTTATGTTTGTGTCTAATCGTGATGAGTTTGGTCGTCTGGTCTCCTCCTCCAACTACAACACCAGCAGACTTCACCCGGACATGTGGTAGATCTTTGACAACCCTCTGGACTGGAAGGAGAAGTATATCCATGAAAACTACTCTAAGATCTTTGAAGACAACCAGACCATCGTGGAGCAGCCGTGTCCTGATGTGTACTGGTTCCCATCCTTTACAGACAGGATGTGTGATGATCTGGTGGAAACCATGGAAGACTTTGGAGAATGGAGTGGAGGAAGACATACGGATGAGCGTCTCGCAGGGGGCTATGAGAACGTCCCTACTGTAGATATTCATATGAACCAGATTGGCTTTGAGAA…
CUST_35461_PI417904088	C038R107	HLADMB	-	-	-	-	-	-	-	0	ttgaacagtgacgctgtttcctctggtgcggagttcagctttaagaatgttgtgtttgctattactgtaaacatgctttaCTTAGCATTCTGATATTATGCTAGCCTCCGCTGTAGTTTGCTGAACATTGAAGTTTCATATTGGTATGTGTGTGTGTATAATGTGTGTGTGTAGGCTACAGATGTAGGATCGTAATTTGATCTATATTGTCACAGCAAAATAATCCTGTAGTAACAGGATTGAAACGTTTTGTCCATAATATTGCTGGATCAGTGGTTAGGCTATAAGCTGGACAAAAGTAGGCTACATGAAAGTGCAATACTGTTCATATAATCTTGTGTTTTAGGGTGGGGCTTTCAGTGAACTTATGTACATCACAAAGCTCATCTGCATTTCCTG…
CUST_11676_PI417904088	C052R001	CHIA	CHIA	-	Acidic mammalian chitinase (AMCase) (EC 3.2.1.14) (Lung-specific protein TSA1902)	LOC106565087	-	XM_014131770.1,100,100.000,60,2.54e-24	NM_001160474.1,100,96.667,60,3.35e-23=XM_021568764.1,100,96.667,60,3.84e-21	acidic mammalian chitinase-like (LOC106565087)	CACATCGAAGTAGATGTAGGCTCCCTGATcagCTGGTCCTCTGTAGAGAGGGCTGTTTTCTCCAGTGTTGTGTTCCCAAGATCCATGAAAGTCATAGGTCATCACATGCAGATAGTCCAACACCGATCCAATCTCGGCGATCTGGTATCCGGTGTCGATGGTTCCCTTTCCGGCAGACACAGCTGCAGTCAGCATCAGACGAGGACGGTTGGTGCTCTTTCCTTCAGCCTCAAAGGCAGCCATCAGCTCCTGCAGCAAGGTGGTGAATCTGGCCTTGTCTGCGGGTGGGGAGCCTCTGGATCCGGGATACTCCCAGTCAATGTCCAGGCCGTCAAACTCGTACTGCCTCAGGAACTTGATAACACTGCTGATGAATGTCTGGCGGTTGGCTGCACTGGA…
CUST_14121_PI417904088	C117R065	TRIM16	-	-	Neoverrucotoxin subunit alpha (NeoVTX subunit alpha)	LOC106583080	-	XM_014166872.1,100,100.000,60,2.54e-24	XM_021609895.1,100,96.667,60,3.84e-21	tripartite motif-containing protein 16-like protein (LOC106583080)	aataaccaacacttttgctctttattcgcttgcttttacatgtatatttataaaaatgtttatttaaatgttgttgttttTTCGTAGATATTACAAATAAGTCGATATTACAAATGTAAAGACGGTAACCATGAAACCATTTAGAGGTTACAAGCTATTTAGACAATAAGATTCCCCAAAACCTAACAGCAATCTAAAACACTTCAAATGTTCTCTGGGATGTACAGTGCATTCGGAATGTATTCAGACCCCTTCACTATTTCCACGTTTTGTTACATTACAGCCTTATTCTAAAATGGATGAAATCGTTTTTTTCCCACATCAATCTACACACAATACCCCATAATGACAAAACAAAAACAGTTTTGAATTTTCATCCATGAATCTTCTGAATGCATA…
CUST_22480_PI417904088	C076R133	PSMA7	PSMA7	HSPC	Proteasome subunit alpha type-7 (EC 3.4.25.1) (Proteasome subunit RC6-1) (Proteasome subunit XAPC7)	LOC106571922	PSA7	XM_014145490.1,100,100.000,60,2.54e-24	-	proteasome subunit alpha type-7-like (LOC106571922)	gatgagcACACAGAAATCAGCTTTTCTTTACAGGTGAAGTGCTTGGAAGATGAGCTACGATCGTGCAATCACAGTGTTCTCACCTGATGGCCACTTATTCCAGGTGGAATACGCACAGGAGGCGGTCAAAAAAGGTTCAACCGCTGTTGGAGTGCGAGGAAAAAACGTCGTTGTGCTAGGAGTGGAGAAGAAAACTGTCGCCAAGCTCCAAGATGACAGAACAGTGCGCAAAATCTGCGCCTTGGATGACAACGTCTTCATGGCCTTTGCAGGGTTGACAGCAGATGCCAGGATCGTTGTTAACAGGGCTCGGGTGGAGTGTCAGAGTCACAGGCTTACAGTGGAAGACCCTGTGACTGTGGAGTACATCACACGCTTCATCTCCAGCATCAAACAGCG…
CUST_19073_PI417904088	C091R035	ADIPOR2	-	-	-	LOC110517608	-	-	XR_002472588.1,98,98.305,59,2.97e-22	uncharacterized LOC110517608 (LOC110517608)	ttgggtttcttaatgctatagtggtgggggtttcttaatgctatagtggtggaaagaaaagctgtacaaaaaaaagaaagAAATGGAATTATGTGTGGAAAGTATTTTTTTGTTCCATGAAAAGGGTGGGTGCCGGGGGGGTCGGGCAGGCTAGCCGCTTTTCAACGTTTTTCATGTAAATAAGATTTCTAAATTCGGGTTATATAGATTTGTATTAAATATATATAATAATAAATAAAATAAAAACATTAAATACATACAAAAAAATGTTAAGATATTGAATAAAAAAAATCGACAAAGATGATGCGACAACAACCAAGAAAAGCCCATTGTGAATAAAGAAATGATTTGGCCAGAGGGGAAGTAAAGTGGGGATACAGCACAACCACACACTGTTGA…
CUST_31556_PI417904088	C231R111	TMED5	TMED5	-	Transmembrane emp24 domain-containing protein 5 (p24 family protein gamma-2) (p24gamma2)	LOC106613977	-	XM_014216869.1,100,100.000,60,2.54e-24	XM_021604235.1,100,96.667,60,3.84e-21	transmembrane emp24 domain-containing protein 5-like (LOC106613977)	GGTGAGCTGTCCAACAGATCAGATGTGAGGAGAAGTTAACGAGTATTAGCTAGCACTCGTCTCTTTACGGAGTCAAAATCTATTGTTATTTCCCGCTTGTTCCGTGTGCGGTGAAGACAGCAGGAGACCATGGACGTGGTCCGGGGGTTATTGTGCCTGTTCTCGGTGCTGGTATCTGAGATGTTCATGGTGGCCGCGTTCTCCCAGAGCCTGGACAGCGACTTCACATTTACACTCCCTTCCGGACGGAAGGAGTGCTTCTTCCAGACCATGAAGAAGGACGCGTCGCTGGAGATAGAATATCAGGTGTTGGATGGAGCAGGTCTGGACGTTGACTTCAGCCTGTCCTCTCCTACTGGACACGTTCTGTACAGTGACCACCGCAAGTCAGACGGAGTA…
CUST_38311_PI417904088	C160R005	F13A	F13A1	F13A	Coagulation factor XIII A chain (Coagulation factor XIIIa) (EC 2.3.2.13) (Protein-glutamine gamma-glutamyltransferase A chain) (Transglutaminase A chain) (Fragment)	LOC110500457	-	-	XM_021577842.1,100,100.000,60,1.77e-24	coagulation factor XIII A chain-like (LOC110500457)	TTGTGTGTGAGAGAGACAGACACTCAGCCCCTGAGGATCGACTCTATCAGACAACTGCAGCTTCTTCAACTTCTACAGAGGCCCGTAAGGTGACGTTTCAGCGCTGGTACCATGTCTGACTCAGAGCCCGCCGCCAAGCCACAACCCCAGGTGTCACACCGCGGACGCAGTGCCGCCCCCATCGCCACCTCCAATGCAGATGGGGAAGAGGTGCCTGAGTTCGAGCCCTTCGGCCTGATGCCCCGAGGACCCCCTCCACTCCAGGAGTTCTTGGACATCTGGGACGTGAACATGCTGCGGAAGCCAGACGAGGTCAATAAGCGGCAGCACACCACCCACCTGTATGCCACTGACAACCTCATCGTTCGCAGGGGACAGGAGTTCCAGCTGAAGGTGACC…
CUST_2058_PI417904088	C163R168	DS22A	DUSP22	DUSP22A	Dual specificity protein phosphatase 22-A (EC 3.1.3.16) (EC 3.1.3.48)	DS22A	-	NM_001140429.1,100,100.000,60,5.18e-26=XM_014127067.1,100,100.000,60,2.54e-24	XM_021607486.1,100,98.333,60,8.25e-23	Dual specificity protein phosphatase 22-A (ds22a)	gggggACAGAGCAGCATTATGGCGATCGTCTTGTGAAGCAATGTAGACAAAGCGGTCCAAATACACCCATGTTGTTGAGCGTAGAGGCGCAAAGTGGTCTCACTAGTGACGGACCGACCATCTCGCGATCACTCGCACGCACCCCTTCATGTTATTGAAAGTCAGTCCATGTTCTTGTCCAATATTTTGCGTTGTTGCATTGAGACGTAAATACTCAGCTGTATTTTAAATACTTCATAATCTTTATCGTCTGCGAGAGACATGGGAAATGGAATGAACAAGGTTGTTGATGGGCTCTACCTGGGAAATATCAGAGACTCGGAGAACAGAGAAAGTTTGTCCCAGAACAACATCACCCACATCCTGTCTGTGTACAACAATGCTAAACCCGTGCTGGAG…
CUST_35218_PI417904088	C233R097	-	-	-	-	-	-	-	-	0	GGGGGACACATTCCAAGGTGAAAGAGGAAAATATAAGGTTGAGGAGTACTCTTCACAAACCCTCTGCAAAATGGCAACGGCAAACCTGCAATGGCCAATGGCCTTATCTGTTAGACTCCAGCATTTCCCCAGAGGAGACCCTCCGATCCCTGTTCCGTACGATCCAACATTCCTGAAGGCAACTCACGCCTCTCTACTGGTTGTCAAAGACACCAAACCGACCCGAGCTTCCCGTTTCGCTGTCACCGTGCTCAACGGCTCAGATGGGAAAATAGTTCCATTGGTCCTCAAGAGCACAGACACCATCGGCAAACTTCAGAGGAGGTTCCTACAGAAGCGGCCTGACCTGACGGGAAGCCTGAACCTCGCCTACAACGGCAAGCCCGTCCAGGGGCACCA…
CUST_1538_PI417904088	C144R017	CDH6	-	-	-	LOC106569244	-	XM_014140425.1,100,100.000,60,2.54e-24	XM_021613321.1,100,100.000,60,1.77e-24	cadherin-6-like (LOC106569244)	gtgGTTTACTGGAAAAGTTTATTATGGTAAAATTTGACAATTGTTAATACATCATAGTATGACATGTACTGTAGCCTGTAGTGTCCACATTTAGTTGTACAACTCCAAAAGACATCAAAAACAGCGATATTGGTTGGATGCTTGTGTTCAACAATATTAATTCAGCATGTGTCCTATATATATTTGGTACAAAGAAAATCACAACATAAAAAGCAAAGTAGTACATCATGTACATCAGCTATGCTCCCAAATCACTGCCACAAAGCACAGTTTCAACCACAGTATATGCCATTATTTAGTCAAACAATTTTACAGAGAAAAGTTTGATGTCAAATCAGAATGATGTACCCAAATACCCAACACATCATTATCCACAAACACTTTCAAAGTCGAAGCGCA…
CUST_16506_PI417904088	C067R006	SCAMP1	-	-	-	SCAMP1	-	XM_014138214.1,100,100.000,60,2.54e-24	XM_021602141.1,100,98.333,60,8.25e-23	secretory carrier membrane protein 1 (scamp1)	ggggggggttttctggtggagaaatacctcagttacagttagtactattcaggattatatcaagatgtactctacgtgcaTGACAAAGCTTGCAGATCAGCTGGATACTACTCTGGTCTAGGCATCTGTGTGTATAGAAGTCCACGGTTACACTCCAGTGAGTGGATGAACTGATGAAAAAGGAGGATTCTGTCTGTTTGAAGTTGATGCTGTGCATTAAAGTGAACCACTCCAGTAGTCCCTCTTTCTCCAAACACTCCTTCAGAACATGAGATATCATTGGTTATATCCCAGTTATATCATTGGTCTGTTCTGTATGGCTGTGTAGATGTTGATAGCCTGAGTATTCATTATTTTTATCTTCATGGTTGAGTGAAAGGAGAGATTCTTCTATTCCCA…
CUST_13130_PI417904088	C236R163	LG3BP	LGALS3BP	LGALS3BPA	Galectin-3-binding protein A (Lectin galactoside-binding soluble 3-binding protein A)	LG3BP	-	NM_001141791.1,100,100.000,60,5.18e-26	XM_021558974.1,100,98.333,60,8.25e-23	Galectin-3-binding protein (lg3bp)	gggggagaaacgaaacGTAGAGAATCCATTTGCAGAAGTGCAGTTTTCATTACATTAGCAACTACTTCCAGCCCTGTTTCTATATAAGCTGTATAATTTCATAAGGGTTGTAAAAGAACCACGACGCACACAGCAAGACACAAGAGTTTTCCAAGCTGGCTGGTGAAAATGCAGAATCGTGGAATCACTCTGTGGCTGCTGTTGCTTCTCCATGTCCCTGGACTAGACTCTGCAACATGGAATCTATTCAGTAAGTCCTCGACAGAGCCCACACAGGAAGGCGCGGTGAGGCTGGTGGGGGGTAAGCATGACTCAGAGGGTCGAGTGGAGGTGTACCACGAGGGGAAATGGGGGACCGTCTGTGACGATGGCTGGGACCTGGCCGAGGCTCAGGTGGTG…
CUST_14690_PI417904088	C233R100	KIDINS220	-	-	-	LOC106610701	-	XM_014210198.1,100,100.000,60,2.54e-24	XM_021583012.1,98,100.000,59,6.38e-24	kinase D-interacting substrate of 220 kDa-like (LOC106610701), transcript variant X5	CTACGGATGCGGTCGATACAGATGCCCCCCTGGACCCCATCAGCGAAGAGGACGAGAAGATGTATTCCAGCTCCTCCAAAGCAGGGGGCTCCAAGGTGAAGGGAGCAGGGCCTCGATACCACAAAGTCCCCAGTGACGAGGAGTCAGACAACACCCCTCTGCTCCAGGAAGAAGGGAAGGAAGGGGGAGCCCAAGCGACATCCGACATTGTTCAGGACAAGAAGGACTCGTCTGACTCTGGGCTGAGGTCTGGTGAGAGCTCCTCGGACCACTCCCTAGAGGAAGCCGAAGAGGTTAATAAAGCAGACCTGATAGAGCTGGAGCTAGAATGTCTGGTAAAGAAGAGGGGCCTGCTGTCCAGCAGTCTGAGTGGACTCCAGGATTCCACCATCGCCCGCA…
CUST_35170_PI417904088	C232R126	-	-	-	-	LOC106590176	-	XM_014180872.1,100,100.000,60,2.54e-24	-	uncharacterized LOC106590176 (LOC106590176)	cccgtgggacAATGACCTCAGTCAGGCTGCTCCACACACACTAGTAGGAAGATGGCTGCTCTACTGCTGCTGTTGTTTAGTGCTGGAGTCCTGTTGTCTTCTATTGAGGCTCAGGAGGCTTATAGTAAACTCCCTGATAAATACAGGAAAGGAGTGGATCTGGCCCTGCAACAACTCAACTCTCATTCTGGAGTCCAGCACCATTATCTCTTCTTCAAGAGTCTCCTGAAGTCCGACATAGAGCCTGGATTTGACGTGAGCTATATTTATCACAATTTCTACCTGAAAGCCACCAAGTGTGAAAAGGGAACAGTTGACGCCAGGAAATGCAAGTTCAGGGACGACCGACCGTTGATAGACTGTGCAATCTGCTACAAAACCTTTGCTGGAAAGATTGAG…
CUST_24742_PI417904088	C203R110	ANO5	ANO5	GDD1 TMEM16E	Anoctamin-5 (Gnathodiaphyseal dysplasia 1 protein) (Transmembrane protein 16E)	LOC106563530	-	XM_014129206.1,100,100.000,60,2.54e-24	-	anoctamin-5-like (LOC106563530), transcript variant X1	gaCGGTTGCATTGGGCCTTTAATTTACAGTTTTTACATTGACTCCAATGAAAATATCTCAAATACATGACAGTAATGAAAGGAAAACACATCACATTTAACGTAGCCCAGCTACAGCCAAATTGAAGCAGATAACATGCCAACATTTGAAGGCAAATAAATTAGATTTTATATGTTACATTCTATCAAACATGCATATTACTTTAAAGGTAATTAATTAGATAGCTGCCGATAAAAGCCATGGGATATCTTTGGCAGTCTTTGCTGGATATGTTAGTAACATATTATGACATTGTGGATAAGGTGAGCATGATATTACATTTTTTTCAAGAAGCTGTATATTGTCTGGTACAATACCATGAATCCCAATAGCATTTAACAAGTTGGCACATACTTTTGT…
CUST_17873_PI417904088	C085R048	APOO	APOO	FAM121B MIC23 MIC26	MICOS complex subunit MIC26 (Apolipoprotein O) (MICOS complex subunit MIC23) (Protein FAM121B)	APOO	-	NM_001141477.1,100,100.000,60,5.18e-26=XM_014196136.1,88,100.000,53,1.98e-20	NM_001165099.1,100,96.667,60,3.35e-23=XM_021617188.1,100,96.667,60,3.84e-21	Apolipoprotein O (apoo)	cgttaagcagtggtatcaacgcagagtggccattacggccGGggtacCGTAAGTACTCGAAGCTTGGCACGGTAAAAAAGGATCATGTACAAGGTAGCATGTGTGGCTGCTGTGCCTGGAACTCTATACCTGATTTCAGGGACTGTGTTTGCTGCCACCAAGGACAATCCAAATGTCACCTTAAATACAGATGAGCTCTCCCTCTACACTATACCCCAGCAGAAGTTCCGCTATGTGGAGCCGGAGATAGGGCACTTGGAGCAAGGTGTAACCACTCTAAGGAAACTGGCAGAGCCCTACACTACCTGGTGTCAGCAAACAAGCCATTCAGCAGTGGAAAATGTTCAGGGTGCCATTGGAAAAGTGATGCCCAAGGTTGAAAGTGCCATCCAATTAGGA…
CUST_9539_PI417904088	C044R089	HPSE	HPSE	HPA	Heparanase (EC 3.2.1.166) (Endo-glucoronidase) [Cleaved into: Heparanase 8 kDa subunit; Heparanase 50 kDa subunit]	HPSE	-	XM_014129366.1,100,100.000,60,2.54e-24	XM_021602816.1,93,96.429,56,6.42e-19	heparanase (hpse)	TGCACTGCGGATAGAAACAAATGCTTTGCTTTCTCTCATTTGGATGAGGACCACACCAAGGACTTTTCTGGACCAGGCAAAACTCAGATTCCGCTCATCAATTGAAACCGACCATAACTGCATACCAATTTACTAATGACAATGACGGATTTTCACCGATCGACGCATTTATTGGGATAGTGAGGGAATGCGAGCATCAGTAGATTTGGGTTGTAATTGTCCTACACATTGCGATATAAATTAGAGTTGAGCCGACTGTGGCGTCTAGCCATATCATTATGTCAGGCATATCAATCTTAGCATTTGTGATGATATCTATGCTATCGTATGGATATTATGTCGTAGCAAGTGTCGAGCCTGCGAGGTATGAGTGGGATTTTGAGTCCGTAAATCTGAATG…
CUST_15068_PI417904088	C256R129	AP1S3	AP1S3	-	AP-1 complex subunit sigma-3 (Adaptor protein complex AP-1 subunit sigma-1C) (Adaptor-related protein complex 1 subunit sigma-1C) (Clathrin assembly protein complex 1 sigma-1C small chain) (Golgi adaptor HA1/AP1 adaptin sigma-1C subunit) (Sigma 1C subunit of AP-1 clathrin) (Sigma-adaptin 1C) (Sigma1C-adaptin)	LOC106569635	-	XM_014141190.1,100,100.000,60,2.54e-24	XM_021614075.1,100,98.333,60,8.25e-23	AP-1 complex subunit sigma-3-like (LOC106569635)	gggggagctcggaggtcagcgagcattctggaGGAACAACCACAGATATGCGCTCTTTCAGTTGTCAGACACGCTGTGCGAGGTGAAACTATTTCACTAACTTTTATTTACTAAAAACGATCCCCAAAAAATCCTCAAAGTGATGCGTTTCCTGCTCCTCTTCAGTCGCCAGGGCAAGCTCCGTCTCCAGAAGTGGTTCACGCCCATCCCCGAGCGAGAGAAGAAGAAGATCACCAGGGACATGACCACCATGGTGTTGGCACGGAAACCACGCTCCTGCAACTTCCTGCACTGGAAAGACCTGAAGATCGTCTACAAGAGGTATGCCAGTCTGTATTTCTGCTGTGGTTTGGATGCTGAGGAGAATGAACTTCTAGCCTTGGAGATGCTGCATCGCTA…
CUST_13780_PI417904088	C100R014	TAP1	ABCB9	KIAA1520	ATP-binding cassette sub-family B member 9 (ATP-binding cassette transporter 9) (ABC transporter 9 protein) (hABCB9) (TAP-like protein) (TAPL)	TAP1	-	NM_001123673.1,100,100.000,60,5.18e-26	XM_021559784.1,100,100.000,60,1.77e-24	transporter 1, ATP binding cassette subfamily B member (tap1)	ttggcccttacacagcaatcacctactcgtttcacatgaagtatagcatagtataattaatctaaaatcggcctttgccaATGTCAAGAGGGGGCGGGTCGTTCAAAAGGGACTTTCCAGTTTTATTTACTTTCGGTTTCTATTATGAAGCACAATCATCAACTCGAACGTGGGGTCAAGTCCAGTCGCAGGCTGCTGCTGCATAACTAGAATAATAATAATATTGCCCTTTATATGATATGAGTGTGTAACATAGAACATAAGCTAGATCTATTCTTAATAGATATAGGCTATCGTTTCCTTGACATTCAGAAGAAATTGCAACCTCAATCGTAAGAGCCCACATGCAAACAGCCTGTTCAGAATGCCGAAAATGAACTTCTCTCCGCTGCTCTTCCT…
CUST_3718_PI417904088	C041R022	MX3	MX3	-	Interferon-induced GTP-binding protein Mx3 (RBTMx3)	LOC100136587	-	NM_001123675.1,100,100.000,60,5.18e-26=XM_014133074.1,100,100.000,60,2.54e-24	NM_001171901.1,100,95.000,60,1.56e-21=XM_021567440.1,100,96.667,60,3.84e-21	Mx3 protein (LOC100136587)	ttggcaactaaccctctcGGAGAAGGTACTGGAGCTGGAGGAGGGAATAGACTACTTTTGAAATATATGCATTGCCAATAATTTCATATCCTTTCAACATCCGCAGTGGGCATCAGATAACAGAACATCTTGCTTTTTATTTAAGTTT*ATCACTAAATAATAATACACAATGAATAACACGCTGAACCAACATTACGAAGAGAAGGTGCGGCCCTGTATCGACCTCATCGACTCCCTGCGCTCCCTTGGCGTAGAGAAGGACCTTGCGCTGCCAGCCATCGCGGTGATAGGGGACCAGAGTTCAGGGAAGAGCTCAGTGCTGGAGGCGCTATCTGGGGTGGCTTTGCCAAGGGGTAGTGGTATTGTAACACGATGCCCTCTCGAGCTGAAGATGAAGA…
CUST_40272_PI417904088	C161R032	PLEK	PLEK	P47	Pleckstrin (Platelet 47 kDa protein) (p47)	LOC106597664	-	XM_014188822.1,83,98.000,50,4.28e-17	XM_021611063.1,83,100.000,50,6.42e-19	pleckstrin-like (LOC106597664)	ACACCAGCAGCTAGAGGTCATGGAGCCAAAACAGATCAAAGAGGGATATCTGGTCAAAAAGGGCACAGTGTTGAATTCGTGGAAGGTGGTGTGGGTGGTGTTGTCTGATGATGGTGTGGAGTTCTTCAAGAGAAAGGCAGACAGTGCCCCCAAAGGAATGATCCCACTGAAGGGAGCTGTTCTGACCAGCCCCTGTCAGGACTTCAGCAAGAGGGCGGTACGGACACTACTAAATACAAGTACAAGTGTCTATCATTACTGTAGTGCTCCAAACAGTCTAGTTCCTGATCTGACCTCACAATTTTGGCAACATACAAAATTAAAGTACAATGAAAAACATTCCCCCCCCCCCATACATAAAACATGTACATAACATTGCCCTTTTCTTTAAGCTGGTTT…
CUST_6604_PI417904088	C088R110	HSP30	HSP30	-	Heat shock protein 30 (HSP 30)	HSP30	-	NM_001140968.1,100,98.333,60,2.41e-24=XM_014129069.1,100,100.000,60,2.54e-24	-	Heat shock protein 30 (hsp30)	gtggggacagaaaccaatatatccAACACTGAACACACAAGACTCAACACTCAACATTGACTGAAGATGCTGTGTTCCCGAGGATTCCAGTCTTCCCTCAGCCCATTGATGGACTTCTACTGGCCTGTGCGCAGTCTATGGCCAGAGGTCCGACCTCTTCTCAGCCAGCGGGATCTACTGCAGAGAAACCTGCTGGAAATCAAGAGCAGTCTGGAGCTGATGGAGAAACTCCAGCAGCACATCTTTGAAGAGTTGGACAATGTCCCATCCTCTGTGGCCATCCAACCAGTCTCCTACAAGCTGGATACGGAGGGAGACGGCTTTGCCCTTACACTGGACACTAAAGACTTTTCACCAGAGGAGCTGTCTGTCAAGCAGGTGGGCAGGAAGCTGAAGGTC…
CUST_41398_PI417904088	C118R007	SCYB7	CXCL11.1	CXCL11AA	C-X-C motif chemokine 11-1	-	-	-	NM_001124316.1,100,100.000,60,1.55e-26=XM_021622223.1,100,96.667,60,3.84e-21	virus-induced CXC chemokine (LOC100135977)	CAACTTCCATCACTTGACTGAGCTGTCCATCCAGACTCTAAAAGAAACTGAAGAAGCAGTATCCATGACCAACACGATGACATCAACGGTCCTCATCAGCTTCCTGGCCTGTCTGCTCCTGGCCAATGTTGAAGGCCAGGTGGGTCATTCTAAAGCTCGGTGCCAGTGTCAGAATGGACTGGTGAACCGTGTTAAACCTCTTCACATTGAGAAGCTCGAGGTGTACACCTCCAGCCACTCCTGCAGGAACATGGAGATCATTGTCACTCTGAAGAATGGAGAAGGGAAAAAGTGTCTGAATCCAGAGGCTCCATTTGCCAAGAAAACCATTGAGAAAATAATGAAAAAACAAAGGAGTGTGCAGTAAATCTGTGAACTAATGACACCAATCCCACTGAG…
CUST_3277_PI417904088	C037R113	HBEGF	HBEGF	HEGFL	Proheparin-binding EGF-like growth factor [Cleaved into: Heparin-binding EGF-like growth factor (HB-EGF) (HBEGF)]	HBEGF	-	XM_014198142.1,100,100.000,60,2.54e-24	NM_001165167.1,100,95.000,60,1.56e-21=XM_021617190.1,100,93.333,60,8.31e-18	proheparin-binding EGF-like growth factor (LOC106603916)	GGGGAGAGAAGCAGCGACACCTTAAGCCTTCTGGACGTAGACACGTTTAACTCCGCATAGATCCTACGGTGGAATTTATTTTAAAAGGATAACGCCTCGTTCTGACTGTATTTTTCGCTAACGCAAAAGAAAAACAGCAATGAATATTTATCTCAGATTTGCAATTTGTATTGTTTATGGATCAGTGTCTTTCAGGATATCAAGTGGTGCCTCCGCCAATACCATTGACAGGCACGGGGATACGTTTCCTGCCCAATTAACTGTGGTCAGTCTCCTCCACAATGATAAGGAAGTAAGAGACAACCAGCTAGAATATGACGAGGAGGAGTACTATTATGAACATGGTGATGAGGACTACCTGTCTGGGGATCATGAAATGGAGTTTCCAAAAGTGGCATT…
CUST_23293_PI417904088	C153R003	ERN2	ERN1	IRE1	Serine/threonine-protein kinase/endoribonuclease IRE1 (Endoplasmic reticulum-to-nucleus signaling 1) (Inositol-requiring protein 1) (hIRE1p) (Ire1-alpha) (IRE1a) [Includes: Serine/threonine-protein kinase (EC 2.7.11.1); Endoribonuclease (EC 3.1.26.-)]	LOC106606683	-	XM_014203025.1,100,100.000,60,2.54e-24	-	serine/threonine-protein kinase/endoribonuclease IRE1-like (LOC106606683), transcript variant X1	GCAGTGTGCGTTTTTTTT*ATTTCTCATCTTACTACACAATGATACAATAATACAAAATACAGATACAAAATAAAATAAAAACATTGTGGACCTCTCAAATTGAGTTGAGGCACTAAAAGCCATTATAGTCAAACATGGTACAGGCATCATCTATAAAGCATTAAATAATCTATGGACATACATAAACAAAACAAAGTACAGTGAATAAAAGGACAACTATGCACTTAAAGAAACGTCTCCATTTGATGTGCCTGTGTCAGGGTCCACATTCGATCAGGAATACATTCATGCATAAAGAATGCTATTTCATAAGCAATGTAATGGAAAAACAGATACCCCCAAAAATAAAAAATAAACTAAGTTCACTTTTGAATCACAACAATAAAGTACATTGACAG…
CUST_19210_PI417904088	C177R058	ERG28	ERG28	C14ORF1	Probable ergosterol biosynthetic protein 28	LOC106591002	ERG28	XR_001325165.1,100,100.000,60,2.54e-24	-	probable ergosterol biosynthetic protein 28 (LOC106591002), transcript variant X1	gggggatcagctagttATTGAGCGACAGTACAATAGCGAGATTCACACGGTAGTCTCAATCTCCAAACATTAGCAATGTTTTTACAGACATGTTGACATTATATGCCTATTGATTTCGACTCGCCGATCACTGTCGTATCAGGGTATGCCCCAGGTATAAACTACATATTAGAAGGTGCATCCCACAGAAGGCAAGGATGAGTCGTTTTCTGAATGTTCTGCGGAGTTGGTTGGTCATGGTGTCTGTCATTGCCATGGGAAACACCGTCCAGAGTTTCAGAGATCACAGCTTCCTCTCTGAGAAACTCTACACAGGGACACCAGAGTTTGGCTCTATCACATCACCCTGTGGACATTTCTACTGGCTCTGGGACACTTCCTGTCTGAAGCCTTCATCTA…
CUST_9986_PI417904088	C047R086	RTN3	RTN3	-	Reticulon-3	RTN3	RTNT3	XM_014155629.1,100,100.000,60,2.54e-24	XM_021615315.1,98,98.305,59,2.97e-22	reticulon 3 (rtn3), transcript variant X2	gggggagtgccctccatccacacagtgcttGGTACATGCGCGTGAAGGTGCACAGGCTCGGTGACACTGCGTCCAGGTCTTGGGGAATACGAGGCAAGTTGGAAGAAGACATTTTAAGGACAGCAGTAATACACTACAAATTCTCGCCGCCACCGTGCAGAATTTTTTGAAATTATAGTAAAATGGCAGATCCAATGACCCAGTCCGCCCAGATATCATCGTCGCAGGGGCTGGCCGATGGACAAAACTCTGTTGCGGCCAAAGACTCAAAAATGTCCGTCAAGGACTTGGTGCACTGGCGAGACCCCAAGAAGTCTGGCGTGGTGTTCGGCCTGTCCCTGCTGACGCTCCTGTCCCTGGCGGCGTTCAGCGTCATCAGTGTGATCTCCTACCTGCTCC…
CUST_3222_PI417904088	C149R014	RUFY2	RUFY2	KIAA1537 RABIP4R	RUN and FYVE domain-containing protein 2 (Rab4-interacting protein related)	RUFY2	-	XM_014180117.1,100,100.000,60,2.54e-24	XM_021576541.1,100,95.000,60,1.79e-19	RUN and FYVE domain containing 2 (rufy2), transcript variant X2	GATTATGTGAGATGTACCATATCTATTTATTTTTTATGAAAAGTATTCATTCCAGTTTTGGAAAATTATACATTGAAACACATTGTTTTGCTGATTGAATACAAAACAAAATATACAGCAAGTGTATCATTTGGTACACACAAATGAATGTACAGTACATCTTAAATTATTTGTCACTTTGTGATACACGATTTTAAACTTGTATGACAAATATTCAAATAAAATGTGCAGAAAAACAACAAATACTCAGAAATGAAATATTTTTTCCACTTTATAAAAATAAATACAAGATGGGTGTTTCCAAACGTAATCATTTGCTACGTTAGGTAGCTACAGTATATTTTAATGATAATTATAGTTATTGTTAAGTTAATAATTAATTAGGCCTACTTAAGTTAA…
CUST_18286_PI417904088	C114R065	ESYT1	-	-	-	LOC106572666	-	XM_014147039.1,100,100.000,60,2.54e-24	-	extended synaptotagmin-1-like (LOC106572666)	gggggtagtagaggagaccaattagatgagaggatggccacactttcctgcagtgcaatggtacttttactgttgcttctTCTGTATGGTTTATTTTATATTTTTATTCAGCTAATGCACAATGGGACCACCACTGAAGAATCGCTTATATTACCTATCATCCCAACAATATCACAATTTATCTGTGAATTGAATAATTACAAATGATAGATTTGCTTCGTCTTATTACCTACCGTCTTAGGTAGGCTCTGTAAGAAAGAATTCCTAAATTCTAGAATTCCTAATTCGAGTCTGAAAAAGTGTTCTTTAGAATCTTTTGTCTGAGTAGATATTTGATATGAAGGCAACTATATCGCTCCTAAAGGAATCTATCTTGAAAAGCACAAAGTATTTTATCAA…
CUST_22508_PI417904088	C049R153	-	ERVFC1	-	Endogenous retrovirus group FC1 Env polyprotein (Envelope polyprotein) (Fc1env) (HERV-F(c)1_Xq21.33 provirus ancestral Env polyprotein) (HERV-Fc1env) [Cleaved into: Surface protein (SU); Transmembrane protein (TM)]	LOC106602481	-	XR_001328217.1,100,100.000,60,2.54e-24	-	uncharacterized LOC106602481 (LOC106602481), transcript variant X2	ACAATAGTCAACCAAGTTTATTCACGAGAGCTCTGAATATCATACAATGTACACAGCCTTTTATACCTAACATTTGGTCATATCATATGTCATACCCCTTACAGATGCCTCCTCCTCTTCTTTAACACTGTCAATGCTTATTTACAAGTTTTCTCCATCACATAAATTGCTTATCATATCCTGCCCCATGTTACATAATCTACTGCAAGCCTAAAGTTTTCTCCCCTCTCTGGGTGGGGAGACCTTCTTCCTGTTATCAGTTTCACTGTGGTCACAAGTTGTCTTCTGTCTGGTAACAGTTCCCCTTTTCCCTTGAATGTCTTGCCTATATTGCTAAATCATTAAGCTTAAACTTTTCCAATACACACACATTAGTACATTCATCTTATAATCACTCGG…
CUST_17188_PI417904088	C198R143	IVD	ACDH-6	-	Probable acyl-CoA dehydrogenase 6 (Probable isovaleryl-CoA dehydrogenase) (IVD) (EC 1.3.8.4)	IVD	-	NM_001141719.1,100,100.000,60,5.18e-26	XM_021572650.1,100,98.333,60,8.25e-23	isovaleryl Coenzyme A dehydrogenase (ivd)	gggggGCACATACAACAGAAACTGTTACTCGCACAGAAATGGCTCAGCGACTGAATTTGGTAGTAAGCCGTCATTTCTCCAAATTAACCTCGCTAAGCAGTACAAGGAAGCTGAATGAAAATGTGTCATCTAAACCCCAAACGGCCAGTGGTTCAGAGATAACGGCTGATCATTTACTCTACACACCAGAGCATTTTGCGTTGAAGGAATCTCTTAAAAAGATCATCGACCAGGATATCAACCCCTATGTGGACCAATGGGAGGCAGAGGGGATATTTCCTGCCCACAAAGTCTTCAAGCTCTTGGGAAATGCTGGCTTTCTGGGTGTCAACAAGCCAGTTGAGTATGGAGGCCTGGGTCTGGACTTCAGCTACAGTATAGCTGTGTCAGAGGAGCTGG…
CUST_9399_PI417904088	C126R005	C209E	CD209E	-	CD209 antigen-like protein E (DC-SIGN-related protein 4) (DC-SIGNR4) (CD antigen CD209)	C209E	-	NM_001141449.1,100,100.000,60,5.18e-26=XM_014201809.1,100,100.000,60,2.54e-24	XM_021623186.1,100,100.000,60,1.77e-24	CD209 antigen-like protein E (c209e)	ggggacaCACACAGCAGAGATAGAGAGTAGCAGCTGCAGCAAAAGGATTTTGGGACAGACTGAGTATTGTGTTACAGGAATTAATTATAAATCTAAAAGGGGCACGTTGCTATAGAGACGGAGAGGGAGGTTTTTTAAAACCACAGTGCATTTAGCCTTCACAGTACTTTACAGTCGCAGTCGGTGGGTCAGGAACAGCAGCAATGTATATCAAGTTTTGCCGTATTGTAGGAAGTGGAGGGAATGCCAAATTACCAGATGAGGCAAACGCAAAGTTATCGGTTGAAGTGAAGGAGCAGCAAGGGAAAGACCTGCAGGTCCTGGGGAACGTTGGTCTGTACCGCACAGTGTGTTTACTACTGTCTGTCATCTGTCTGGTTCTACTGCTCGTCATCATCA…
CUST_20654_PI417904088	C058R138	RSPRY1	RSPRY1	KIAA1972	RING finger and SPRY domain-containing protein 1	RSPRY1	-	XM_014149014.1,100,100.000,60,2.54e-24	XM_021597248.1,100,98.333,60,8.25e-23	ring finger and SPRY domain containing 1 (rspry1)	ttggACTTGGGTTGCATGTTGTTTTTCTGTAGAATGAGGATGCGACTTTGTCTTATTTATTTGTCAATCTCTGTTCCCAGAGTTCTGAGGCCCATCCTACTGTTATGCTCTTTGCCCTCATAGCCTTGGAGAAGTTCTCACAGACCAGTAAGTTTGTCCCCATCTCCTGTACATTGGCCATGAAACAGACAACTAACTGTCATATTTCACTGTTGCAGGTGAGAACAAGCTAACGGTGTCCGAGTCGTGTATAGGTGACCGGCTGGGGATTCTGGAATCGTGGGCTGACCACACAGACTACCTGAAGCGCCAAGTCGGCTTCTGTTCCCAATGGAGCCTGGATAACCTCTTCCTGAAAGATGGTCGTCAGTTCACCTATGAGAAGGTGAACCTGAGCAA…
CUST_1017_PI417904088	C163R027	PLAT	PLAT	-	Tissue-type plasminogen activator (t-PA) (t-plasminogen activator) (tPA) (EC 3.4.21.68) (Alteplase) (Reteplase) [Cleaved into: Tissue-type plasminogen activator chain A; Tissue-type plasminogen activator chain B]	LOC106580425	-	XM_014161475.1,100,98.333,60,1.18e-22	XM_021606253.1,98,96.610,59,1.38e-20	tissue-type plasminogen activator-like (LOC106580425), transcript variant X2	aaatgttctttatttaaaaagatgggtgtgtctttctcagaaaaaggTTATGATAGCCCCAAAAATAAATTATAAACATAAACAACTCTTTCAGAACTCTACACATTGAACTACTAAAAAAACTGCATAAACTATTACAGTAGAAAAAAACTGTAACAGGAATAGACATAAATATTAACTTAATACATACATGTAAAATACAAATATTAAACATTACTGTCCTTGAGAGGGTGTATATTTTTGAGATAATAAATAATATGAACACTCACTCAAACATGAACAAATACTGTACTATGTGAGGGAGGTGGAGTCCAAGAGCTTTGCAGTGAAAGAGCTTTCGATAGATACAAACACCTCCCAGTCCTTTTCAACATAAATCCAACTTTAAAAGACTGGATA…
9_1_11_14	C192R146	CYB5	CYB5A	CYB5	Cytochrome b5	LOC106590088	CYB5	XM_014180637.1,100,100.000,60,2.54e-24	XM_021563077.1,100,98.333,60,8.25e-23	cytochrome b5 (LOC106590088)	GGGGGAGCTTCCCGGTGCGTGCCAGGAATTACAATACAAATCTCTGAACTCACTTTGTCATCTAGGCTAAATGTCGTTACGTGTGTACTTGTACATAGTCACTGCATCGAAATATTTGTAAGATTGGAACATAATTCTTTCCTGGATTCACATTAGGTGTATTTATTTAAAATATAAATGGAGGATAAAGAGGAGAACGGACAAGCTGTAAAATACTACCGACTGTCAGAAATCGAGGAACAGAATACGTTCAAGAGTACATGGATTATAATCAATTTTAACGTCTACGATGTCACCAAATTTCTGGAAGAGCACCCAGGTGGAGAGGAGGTCTTGAGGGAACAGGCAGGCGGTGATGCCACAGAGAGCTTTGAAGATGTCGGGCACTCATCAGATGCC…
6_3_13_16	C169R001	IRF3	IRF3	-	Interferon regulatory factor 3 (IRF-3)	IRF-3	-	NM_001172282.1,100,100.000,60,5.18e-26=XR_001322642.1,100,100.000,60,2.54e-24	NM_001257262.1,100,98.333,60,7.21e-25=XM_021564413.1,100,98.333,60,8.25e-23	interferon regulatory factor 3 (irf-3)	ttgggtcACGGTCGACACACTTCACATTTTCTGCATAATATATCTAAGGAAAATTACCAGACTGAGCGTTACTTTAATCCAGACAATAACTGATTCGTGAACGTCGGCACACTGTTCGAAGACGAGATTAACAAATGTCTCAATCCAAACCGCTCCTAATCCCTTGGCTGCGCGAACAGATAAATAGTGGCCAGTATCCAGGGGTTACCTGGACCAATCAGGAGCGAACAGAGTTCTGCATCCCTTGGAAACATGCTTTGAGGCAGGATTCCTGCAGCGATGATGTACTTATTTTCAAGGCGTGGGCTGAGGTTAGCAATGGTAGGGTTCAAGGTGACCCCTCCATTTGGAAGAGAAACTTCCGTTCTGCCCTCCGAGCCAAGGGGTTCAAAATGCTCC…
CUST_25682_PI417904088	C001R135	MRC1	MRC1	CLEC13D CLEC13DL MRC1L1	Macrophage mannose receptor 1 (MMR) (C-type lectin domain family 13 member D) (C-type lectin domain family 13 member D-like) (Human mannose receptor) (hMR) (Macrophage mannose receptor 1-like protein 1) (CD antigen CD206)	LOC110508265	-	-	XM_021588692.1,95,96.491,57,1.79e-19	macrophage mannose receptor 1-like (LOC110508265)	caagtgtttctgacgacccagatgacttctggtgctactgacctgtggattggactgagtaacttaaaccgggacgcgttTGTTTGGACCGATGGCCAGGCAGTCAAATACTTAAACTTCGATTTCATGAAGAGACTGTCGCAGATGTCCCCATGGCGACGGCGTCACTATCGTCAGAGGTACATGGATATGCTTTCCTCTCGGGCTAGTCAGTGTGTTGTGATGGCCAGTTCCTCCTCCATCTTGGGAAAATGGGAAACCAGGTCCTGCAGCGACACATACGGCTTCATCTGTCAGCGCAAAGTTGACTCAGGGATCCCAGTCCCGGCCCCGACAGTGTTACCTAGAGGCTGGGTGAAGCTGGCCTACGACTCTTACAAGGTGCTGCCCCAGAACTGT…
CUST_5504_PI417904088	C005R028	SLC39A1	SLC39A1	ZIP1	Zinc transporter ZIP1 (Solute carrier family 39 member 1) (Zrt- and Irt-like protein 1) (ZIP-1)	LOC106561904	S39A1	XM_014126236.1,100,100.000,60,2.54e-24	-	zinc transporter ZIP1-like (LOC106561904)	gtttttttttttttTTTTTTTTTTTTTTTTTTTTTTTTTTCATAGTCAACTTGTTTAATCATTATTTTACTGCAACAGTGTCAGAGAAGATTGGAGGAGTAAGAGGAAGCTGAGGGTCACTTGTGATAGTGTTGTTATAAACTTGAAGCCTTGTTAACACAACAGAAACATGACTCATGGCTGGGGTATGGAAACTATCAACACAATGAGGAACAGAGTCAGGAAAACACATGCTTTAGTTGAACTTAACCTCATAATCTCTCTTTAAATATTATGGTCTCTAAAAAGTAATCAGACTATTGCTCTGTATCAAACTCGTGATGTGGCAGTGACAATACACTCTCTCGATTGCATCATGTCGATTACGAAAGGAATGATGCCTCCACGCAAAAAGTGATG…
CUST_7734_PI417904088	C032R077	ABHD12	ABHD12	-	Lysophosphatidylserine lipase ABHD12 (EC 3.1.-.-) (2-arachidonoylglycerol hydrolase ABHD12) (Abhydrolase domain-containing protein 12) (Monoacylglycerol lipase ABHD12) (EC 3.1.1.23) (Oxidized phosphatidylserine lipase ABHD12) (EC 3.1.-.-)	LOC106576811	-	XM_014154249.1,100,100.000,60,2.54e-24	-	monoacylglycerol lipase ABHD12-like (LOC106576811), transcript variant X3	gcagtgtagattttttatgacatttgaatgtgcatcagatggcaacaagatcatattgtacagcaatttcatcaggtaacATGAATACAAAGCCGGCGAGAGAGGGTTAGAATAGGATGGAAGGCCTTGTCTGCGTAACCAATAGAGTCAGAGTTGTCAGTTTGGAAACAAACATTCCCACTGGGCACAGGCGTCAGTTCAACATCTAGTATTGATTTGGTTGAGTTGTCAACTAACGTGAATTGAAATTGAAATCAACAAACAATTTCACCCCGTCATTAGATTTTGATGAACATTTTTGCTAATTTAACCAGTTTTCCATGTTGATTCAACATCCTCACATTGAATTATTTGGTTGAAATGACATGGAAACAATGTTGATTCAACCAGTTTTTGCCC…
CUST_9962_PI417904088	C135R027	NBEAL1	-	-	-	LOC106574613	-	XM_014150599.1,100,100.000,60,2.54e-24	XM_021570892.1,100,98.333,60,8.25e-23	neurobeachin-like protein 1 (LOC106574613)	tgtcatctctattgcaatctcagtagatttctatatcacatttaatgtggttcctgagatgctgaacacttctccaggcGTTGTGAGATCTGATAATCAATAAAGACGACCTGGAACGCACCCAAAGTCCGCTAGTTTGACACTACAGAAGAAGAGAGAAGCCAGGTGTTGTAGAATCACTAGCTACCCCATACCGTGCCCAAAGGACTCGCTCCCCTCGAACACCACACTGTTACACACACTGCAAGCTTCTCATACAGCCCATCACTACACTTGTGTTAGACCGCATGCTTTGGAGGGACGAACCATACTGAACCTGGCTTAGTGTGCAATGTTTAGCGCTAGATTCATCCTAGAATGTTTTTATGTTACTTGAATCAATGTTTATTTATGAATGAA…
CUST_24431_PI417904088	C126R011	TRIM16	-	-	Stonustoxin subunit beta (SNTX subunit beta)	-	-	-	-	0	aaccaacaatctttttattattgagaAAagaAATCAataCAGCAaTAATtctTtAGTTTagaCTTcatCAAAgGgagAatACCCCAATATGAATgGgATTAAAACCTAGGctAAATTAAAGATTCAATcACtCCAAAACTAATTCCaCATAACCAGACTAAAAGAGCATTAACCGTCATTcTAATATCGGAACTCTACAGTTTACAAAGCTCAGCAGAATTATTTACGTTATTAACCCATATCCCAGGATAGAGGGGTTTAGTGAACGTGGTTTCAACTGTGTGAAGGAGGGTCATTGTGTCAGAGACGCTgTAAAAGGACAGAATACCTGCCTTGTGATCCAGggaCACTCCTACTCTGGAGGACTGAGGGCCTGATACTTTAGTCTCAACATTATTG…
CUST_16183_PI417904088	C109R167	LPL	LPL	-	Lipoprotein lipase (LPL) (EC 3.1.1.34)	LOC106613695	-	XM_014216226.1,100,100.000,60,2.54e-24	-	lipoprotein lipase-like (LOC106613695)	atATCATGTTTTCACTTTATTAAAGTATCATATTCTGTCTTCATAGAGTGCACTGCATTTCAGTTCAGAAAAATAAATGTGCTCATCAGCTGGCATGGAGACCAATTTGATCAGTCTGTCCAAAGCCACTCACATAAAATCACACCGCTTCATCTAGAAAAACAGCAACATCTATGGAAATCTGCCCAAATATATTACAGCTAAATATACAAATATATACAGGTACATTCAATAAATAGAATATTAAACATTCTTGGGATGTTTATGGTTATCATGTAGGGCTGCCCACCCATGTTGGCAAAGTCTCACATATATGCTATACATTTAGTGTAGCATTTTGTTTGACCTTTTTAAAGAAAATGGAATGTTTTAGAGAGCATGCTTGACCAATCGGGTTAA…
CUST_2688_PI417904088	C250R025	BCORL1	-	-	-	LOC106575663	-	XR_001321819.1,100,100.000,60,2.54e-24	XR_002469430.1,95,98.246,57,3.84e-21	uncharacterized LOC106575663 (LOC106575663)	aaatgtagatactcatctttttAATATATAAGAGCAAAGTATCCACGGG*AAAAACAAACAAAACCGGCTAACAGGCTACGTACATACTAAAGACTAGCAGTGTTAGCACAACCACCCACAACCCCAAGTGACAAACATACTCCTAATTATATGACTCCCAATCAGGAACAACGATAACCAGACGATAACCCACATAGAAATACAACACCCAGAACACACATACACAGACATACTCTGCCACGTCCTGACCAAAACTACACAACAACACCCTCTGCTGGTCAGGATGTGACAATACCTTTC*TTTTTTTGCTGTGATCCTTACTGCAATTTCATTGGCAATTTCCACAGAAGTCACAGCTTTAGAACAAAAAGGAAGTTAAGCAGCTGATTACTGTAAT…
CUST_25551_PI417904088	C077R053	HERC3	-	-	-	LOC106610285	-	XM_014209557.1,100,100.000,60,2.54e-24	-	probable E3 ubiquitin-protein ligase HERC3 (LOC106610285)	ctatacaggtgaatggtgcttgtttaataaagttagatcaaagctgaatcaaatatattagcatcagggctgtagctacaTAAGAGGACAAATGAAAATAAAATAAGATCTGCTTTAATATTGCAGATTGTGGCTTCTATCAATGTAGTTGTCTGCATCATTTCCAATCCCCCATATATTTTGGGGGTAAATACAGTGTGTGTATATGTATGTATATATTTTTTTTTTATCCCTAACCGTACCACCCCTCCCCGAATTGGAGTAAACTAATGGACAACACTTTGGCTTCTATTTCCAGTTTATACATACTGTCACACCAGGTGGCTTGTGGATTCAGGAGAGGTGGAGTCAGGCGCAGGAGACAGAATGATTCCGTGAATACATTTTAATAAAATATCC…
CUST_3219_PI417904088	C210R115	EPDR1	METTL12	CSKMT	Citrate synthase-lysine N-methyltransferase CSKMT, mitochondrial (CS-KMT) (EC 2.1.1.-) (Methyltransferase-like protein 12, mitochondrial)	EPD	-	XM_014155652.1,100,100.000,60,2.54e-24	-	ependymin-like (LOC106577537)	gggggaCAGCAGTCCGTCTGTTTGTTGGCGTGAGTGTGTGTGACATTTGGAAGCATGAGGACCTTCGTGTTGTTGATGTGCCTTGCAGTGGGCTGCCTGGCTCAGGCACCTCATCCGTGCAGGTCTCCCCCTCTTCTGACTGGAGCCATGTCAGTGGCAAATGAGAAGGTTAATGCATATGCAAAATACGACTATGATGCGTTAGGCGAGCGTATCCGCTTCAAGGAGATGGGATCTTATGAGAACAAGACATTCGGCCTGGATGCCCTTCTGCTCTTCAGAGAGGGCGTCATGTATACGATTAACCACAAGAACCGCACATGTAAGAAGGAGAGGCTGAAGAAGGAGGACTTCCACCCCATGGAGATCCCTGCAGATGCTACTCTGCTGGGGCAGGTG…
CUST_8953_PI417904088	C174R133	CSF1R	-	-	-	LOC106604846	-	XM_014199902.1,100,100.000,60,2.54e-24	-	macrophage colony-stimulating factor 1 receptor 1-like (LOC106604846), transcript variant X3	GAAATTAATTTATTGACTGCTAAACACTGTACAATCATTTGTATACATCTCCTGTTGTGCTAGTCTCTGTTCTGTCAACCTTGACCACTGATGGTGCTGCACAGCACTGACAGCTGTGTTGACATGACAACTGGGTCAGAATTCCTAACCTTCAAATGGATAATGTGACAAAAGTGTTTGTTTTGATTGGTTGTTGCTTGCAGCCAAGTTGCAGATTAGTTGCTTATTATTTCACAAAGCAATGAAGAAGCAACTAAAATTGCATGCAAGTTGCATCGTGTAACGGCAGCCTGTGTTGCAGTGGCATCATCAAGCAATTAGAAGACAATGCCTACTCATAAATGCTTAAAATCACATTATGCACACCAATGATGTCAATGGAAATACTTATCTTTATCT…
CUST_8836_PI417904088	C009R115	RNT2	RNASET2	RNASE6PL	Ribonuclease T2 (EC 3.1.27.-) (Ribonuclease 6)	RNT2	-	NM_001140972.1,100,100.000,60,5.18e-26=XM_014213709.1,100,100.000,60,2.54e-24	XM_021587534.1,100,96.667,60,3.84e-21	Ribonuclease T2 (rnt2)	gggggacattagcagggaactgtcattgTAGATCAGTCACACATGATCAGTCACTCTCTCTGACTAGCATCAATATGCTTTCACCAGTGCTGCTCATGGTGGCCTTGCTGACTGTCCTTACCGTCACCATGGAGTCTGACCACTGGATAACAGACCAGCAGGAAAAGTTCTGTACATGGCAGTGTTTGAAGTTTACTCTGCAGTGGCCTGGGAGCTTCTGTTTGGGTCTAAAGAATTCATCACAATGCAGAATACCTCCAAACATCCAGACCTGGACTATCCATGGACTGTGGCCTTTGAAAGCTCATACATGTTGTCTCTGCTGGCCAATATTCCACTCTGACCTCAAGGAACTGGACCCTGAACTCTCTCAACTTTGGCCATCCCTACTCAAGACCC…
CUST_13705_PI417904088	C257R050	CHKA	-	-	-	LOC106560813	-	XM_014124139.1,100,100.000,60,2.54e-24	XM_021570536.1,100,98.333,60,8.25e-23	choline kinase alpha-like (LOC106560813), transcript variant X2	CGCGTTTTATTTCTTTACCTTTATTGTAGTACTTGTGCAAAGCAGTAGAAGGTACAGTAAATGTATATAATGAACTTGCCATAGTGGTACATTTTCAAATTACTTTACCCTTGCTATTTGCAAGGGAAGAATTTATACGGTACATATTTTATTCTTTTAGTGTATATCTGCATAGCTATCTTTATAGGTAAGCAAGGCTAAATGTTTGCACTCACAAAATAGAGTAGTTGGGATCCTTTCACAGCATATACAAATTGGACATTCAGTTCAATTATCCATAAGATTACAATATACATAATCAACAATATTCAGTGTAATGTAGAGAACTTCCTTCTTCCCTCATGTTTTGATAATCAATTACATTTTATTTGATCTCTGTATTGAATGGCAAGACATGAA…
CUST_35943_PI417904088	C198R164	NKL	-	-	-	-	-	-	-	0	GGGTGTGAAAATAGCTTTTAATCACATAATCTTAATAATTCATATTTCTATACATTTTTCAGATGACAGCCCTTGCTGGATGTCATTTCCTACTAAGCAATCAAGATTATTTACAGAAAGTTGAGATTCTAAATAGAAATGTCAACATGATTACATTAATTACATTGTAATTAAATGCTTTATCATCGCGTTATCATTGCATTTTCAACTTCGGATGAGTAAAAATGGGTTCAGATGCTAAAGTTTTTCTTTTGGATAAGTGTATAAAGAAGTTGGTGTCAAAGAAGGGTTGCAGTTGTACTCTATATTAAATTAAGTTTATTTTTTGCTGGCCAAAAAATTCACACAAACATAAAACATTCGGAGAATAATAGACTATTTTATACTAAAATAGCAAAA…
CUST_17926_PI417904088	C190R148	SEPTIN7	SEPT7	CDC10	Septin-7 (CDC10 protein homolog) (Fragment)	LOC106560914	-	XM_014124356.1,100,100.000,60,2.54e-24	XM_021568868.1,97,98.276,58,1.07e-21	septin-7-like (LOC106560914), transcript variant X6	GGCATAACCTTCTCATCTTTAATATTAATAATGTACAGTTAGAGAGAACAGATGATAATAAAATGAAGAACAGAATAAAGCTGAAGAGTGTAGATATATAAAAAA*CAATAACAAAAACTCCTAAAGTTATGGCTACCTTCAACAATATTAGATAGGGGAGTGGTTAAAGAATGATTTAGGAAAAGTTTGTCTCAGACCTGAGCTCAAATGAGCCTTTAAGACTTCTCAGACCATGGACTAACTTCTGACTATTACAACTCAGAGACCTGCAACAAGAGACTGGCCCTGAGAAAGTATACAGTTGGCATAGAGTTATATTGTGTGTGTGAGTGTGGCTTGTGAAGGCAGTGTAGGTTGGGTCAGAGGTTGTCTTCTGGGGTTTGTGTTCAGTTGTGAAG…
CUST_27600_PI417904088	C200R138	RAB13	RAB13	-	Ras-related protein Rab-13	RAB13	-	XR_001328955.1,100,100.000,60,2.54e-24	XM_021598314.1,100,100.000,60,1.77e-24	RAB13, member RAS oncogene family (rab13), transcript variant X2	ACAACTTCAACTCAACCTACATATCAACTATCGGCATCGACTTTAAAGTAAAGACGATAGACGTGGAGGGAAAGAAAGTCAAACTGCAAGTCTGGGACACAGCAGGGCAGGAGAGGTTTAAGACCATCACTACAGCCTACTACAGAGGAGCTATGGGCATCATCCTGGTGTATGACATCACAGACGAGAAGTCCTACGAGAACATTCAGAACTGGATGAAGAGCATCAAGGAGAATGCATCAGCGGGGGTCAGCCGGATGTTGCTAGCTAACAAGTGTGACATTGAGGCCAAGAGGAAGGTATCCAAGGAAACGGGGGAAAAGCTGGCAAAGGATCATGGGATCAGATTCTTTGAGACCAGTGCAAAGGCCAGCATTAATGTTGATGAGTCTTTTATGG…
CUST_14247_PI417904088	C149R105	HYAL1	-	-	Hyaluronidase (EC 3.2.1.35) (Hyaluronoglucosaminidase) (Venom spreading factor)	LOC106565982	-	XM_014133713.1,100,100.000,60,2.54e-24	XM_021569916.1,100,100.000,60,1.77e-24	hyaluronidase-1-like (LOC106565982)	CAGATCATGCGATAGCAATCACTTTTCTCTGTAGTCAGTTGACTTTTAAACCAACTATTTGCCCACGAAACCGATGATATGGGTACAAAGTGCATTTTCCCTGGGGTGCTGATTCTTTGTGTGAATGTGGCTGGTATTGTTCTTAACAGTGAGCATGAAGCAGGAGCACTCCCCACACTGTCCCAGCTGCCCTTCCTCACTGTGTGGAATGCCCCTACAGCCCAGTGTAAGAGCCGCTATGGGGTGGATCTGGACCTGGGAGTGTTCAACATAGTGAGCAATCAGAACCAGAGCTTCATGGGTGACAACATCACCATCTTCTACAATACTAAACTGGGTCTGTACCCAAGATACAACCAAGGAGAGGCAGTTAACGGCGGGGTGCCACAGAATGCCAGC…
CUST_19568_PI417904088	C199R067	RDH12	RDH12	SDR7C2	Retinol dehydrogenase 12 (EC 1.1.1.300) (All-trans and 9-cis retinol dehydrogenase) (Short chain dehydrogenase/reductase family 7C member 2)	RDH12	LOC106598856	XR_001327351.1,100,100.000,60,2.54e-24	XM_021574919.1,100,96.667,60,3.84e-21	retinol dehydrogenase 12-like (LOC106598856), transcript variant X3	TCTTTTTTTTTTTTTTTTTTTTTTTTTTTTTTTAGTAACATTTGATCTTTATTTACAGTAGATGTAAACATTCA*ACTCCTGACATGACTACTATGTAGTTGGGTTGCACATTTCTGGAAAATTTCCCCAAATTCCAGAATTCCTGGTTGGAGGATTCCCAGATTTCCTATTCTGTTCCTTCATAATTTCTGGAATCTTCCAACCCTAAATGTAGAAAAAGGCATGTTTCACATTTGTATAAAAGACAATCTTGGCAGTTTCACATGTGGTGAATGCTGAGGGGGAAAGAAATGGAGGAAAAGATGAAAGAAACAGGAGGGAAAATAACAGCTTGCAATGGTTTAGAAAAGGCAAGTTAAAAGCAACCAAACATAAAGCTGAATCTACATGGAGGTTTA…
CUST_14789_PI417904088	C107R080	ANKRD11	PXN	-	Paxillin	LOC106579946	-	XM_014160372.1,100,100.000,60,2.54e-24	-	ankyrin repeat domain-containing protein 11-like (LOC106579946)	tTGGACTACCACAACCTGTTCTCCCCACGCTGCCACTACTGCAACGGACCTATTCTGGATAAAGTTGTGACTGCGTTGGACAGGACATGGCATCCTGAGCATTTCTTCTGTGCTCAGTGTGGATCATTCTTTGGCCCAGAGGGCTTCCATGAGAAGGATGGGAAGGCGTACTGTAGGAAGGACTACTTTGACATGTTTGCGCCTAAATGTGGCGGCTGTGCCCGAGCCATCCTGGAGAACTACATCTCTGCACTGAACTCCCTTTGGCATCCAGAGTGCTTTGTCTGCAGGGAGTGCTTCACCCCATTTGTGAACGGGAGTTTCTTTGAGCATGATGGGCAGCCCTACTGTGAGGTTCACTACCACGAGCGCCGCGGCTCCCTCTGCTCTGGCTGCCAG…
CUST_17990_PI417904088	C200R169	SWAP70	-	-	-	-	-	-	-	SWAP switching B-cell complex subunit 70 (swap70)	CGATGGAACAAAAATGGTTAAGCGTTGTATCTTCATGTGCTTTTGGTCTGTTTTGCCCTGTAGTTCCGGCCAGTTTAAAAGCCTTTGTTGGCCCCTAGAAGTATGCGTGATATAAGACACTCAAATATTCATTAATATGCTGTAATGTGTAAACTTCACCTAGCAACCACCCGCTTGCACCAATCCTTTGTAATTACCGAAAAGTAAATTCAAACCCCTCCCTTCAATCATCCATTCATTCCGATTACAGTAGCATTTAATTTATTTTATAATAGTACATTTTAAGGTATTGTACTCTGTCATTACACAGTACTTGATACCGTATTTATATTACTGTAGGTGTACTGGAAAATGAAATGCAGAATTTCTTTACCTGCCACTGAATTGCCTGTAACTGTC…
CUST_22206_PI417904088	C136R004	NAMPT	NAMPT	PBEF1	Nicotinamide phosphoribosyltransferase (NAmPRTase) (Nampt) (EC 2.4.2.12) (Pre-B-cell colony-enhancing factor 1 homolog) (PBEF) (Visfatin)	NAMPT	LOC100380855	XM_014152971.1,100,100.000,60,2.54e-24	XM_021563565.1,95,98.246,57,3.84e-21	nicotinamide phosphoribosyltransferase (LOC100380855)	ttgggatcgtggAGGGGATGAAGCAGCACAAGTGGAGCATTGAGAACATCGCCTTTGGCTCTGGAGGGGCTCTGCTGCAGAAACTGACCAGGGACCTGCTCAACTGCTCCTTCAAATGCAGCTACGTGGTCACCAACGGCCTGGGGGTGAATGTGTTCAAAGACCCGGTGGCGGACCCTAACAAAAGGTCAAAGAAAGGTCGTCTGTCTCTGCACCGGACAGCAAGCGGGAACTTTGTCACTCTGGAGGAGGGCAAGGGAGACCTGGAGGAGTACGGCGTGGACCTGTTACACACAGTGTTTCAGAATG*GGAAAATTGTCAAGACGTACACATTCGATGACGTCAGAGACAATGCCAAGATAACGGACAGTGACCTCAAGGAGCTCCTCCACTGAGGG…
CUST_31401_PI417904088	C033R056	SLC25A34	SLC25A34	-	Solute carrier family 25 member 34	LOC106583468	-	XM_014167678.1,100,100.000,60,2.54e-24	-	solute carrier family 25 member 34-like (LOC106583468), transcript variant X2	CACAACCATCAGGGGGTGATGAGTGCCTTCGCCAATATCTACTGGCGGGAGGGCGTGGCGGGGCTGTGGAGGGGTGTGAACGGGGCTGTGCCTCGAGTCATGGTGGGATCTGCCACCCAACTGGCCACCTTCAGCTCCACCAAAGAATGGGTGGCACGCCTGCAGTGGTACAGTCCAAATAGCTGGCTGGTTGCCTTGACAGCTGCCTGTATCAGTGGAGTCGCAGTGACAATCACCATGACCCCGTTTGATGTCATCAGCACCCGCCTCTACAACCAGCCAGTGGATGAGCATCATAGTGGTCGGCTGTACCAGGGCTTCTCAGACTGTCTGGTGAAGGTGTGTCGGACCGAAGGTCTGCTAGGGCTTTATAAAGGCATGGGCCCTGTATTCTTCCGC…
CUST_9646_PI417904088	C100R044	PLA2G15	PLA2G15	LYPLA3	Group XV phospholipase A2 (EC 2.3.1.-) (1-O-acylceramide synthase) (ACS) (LCAT-like lysophospholipase) (LLPL) (Lysophospholipase 3) (Lysosomal phospholipase A2) (LPLA2)	LOC106573641	LYPA3	XM_014148876.1,100,100.000,60,2.54e-24	-	group XV phospholipase A2-like (LOC106573641)	ttgggattgataaatgatctgttgcacccctgctttcaaattctgcgcagttttgttttcatgttatgaaatgtgtgtctGCAAAGGGATTTCTTCGTGTTGATAAACACCCACATTTCCTCATCAGGGGAAACAGCGTTATGAATGGGAGAAATGGTATCCTGTGGTTTGACTATCCCAGCGCTCTTTCAGCTGTGTTTGTTGTTTTTGGCACCATACATCAACGGCAGAACATTGGAGAATTGTCTCACGGACAAGTCATGTCGATCGGAAAGACCTCCCGTAGTCCTAATTCCTGGAGACCTAGGGAATCAGTTGGAGGCCAAGCTGGACAAGCCCAGCGTGGTTCACTACATCTGCTACAAGAAGACTGATGTCTATTTCACATTATGGCTCAAC…
CUST_39285_PI417904088	C054R074	INSIG1	INSIG1	-	Insulin-induced gene 1 protein (INSIG-1)	INSIG1	-	XM_014180682.1,100,98.333,60,1.18e-22	XM_021563023.1,100,100.000,60,1.77e-24	insulin induced gene 1 (insig1)	CTGTTAGGAATGATATAGAAGCTTTTTCTCTCTCTCACTCAAACGATGATGTGACCAAACACCGTGATAACAGTCTGAGAGCAGCAAAACGCACAGCATTGTCGGATGAACAAAATCGGGTCTCGCTCGATCAGACAGTGTGAACGTCTGAAGAACAAGCGCTGAAGTGCCAAATGCCAAGACTAGAAGAACACTGCTGGAGACGCTCTTGTACATCGAGGGTGGAATCTAAGAATTATTATAGGGAAAACTGGGTCGCATCGAAGGCTGAAGAAATGATGTCGATTATCACATCAGTGCTTAGCAATGTATACGGCTCGCTGCACAGTGTGCAAACAGCAAACTTAATCAGACGGGGTCTAGTCCTTTTCACCGTGGGAGTATTTCTTGCGTTGGTGC…
CUST_21527_PI417904088	C009R033	CTSA	CTSA	PPGB	Lysosomal protective protein (EC 3.4.16.5) (Carboxypeptidase C) (Carboxypeptidase L) (Cathepsin A) (Protective protein cathepsin A) (PPCA) (Protective protein for beta-galactosidase) [Cleaved into: Lysosomal protective protein 32 kDa chain; Lysosomal protective protein 20 kDa chain]	LOC106562245	-	XM_014127004.1,92,92.727,55,7.16e-15	XM_021586309.1,92,92.727,55,5.00e-15	lysosomal protective protein-like (LOC106562245)	GGGTGCGCACACAGGACTTCGAGTTTAGCAATTGAGGTCAACATTGTTGGCGCATTCGGCTAGTTTCGTCCTCGACATGACCAACATGTCTGTTGTTAGTTTGGTGTTGTGTTTCCTTACTGTTTCGTGTCTTACATGGGCTAACTACGCCCCTGACGAGGTAACCGAACTACCGGGAATGTCGTTTAAACCAAACTACCGGCAATGGTCGGGCTATTTGAAAGCTAGCCCTGGAAAGTTTCTCCATTACTGGTTTGTGACCTCACAGAGGAACTTATTGAAGGACCCTGTTGTGATGAGGCTG
CUST_23395_PI417904088	C249R047	FAM133B	FAM133	-	Protein FAM133	LOC106588949	F133, FAM133	XM_014178528.1,100,100.000,60,2.54e-24	-	protein FAM133-like (LOC106588949), transcript variant X3	ATCATGGCTAAAACATCAACACTTTAATAATGAAACCAGATTCATTTATAGATATCATTCATAGTTGTATAACTCATTACATTTAACAGATTGTCCCTTGTGATTATGACCATTTGACTTGCATTTTTACAATCCCAATTTACATGAGGATGACAAGAGAAGTGTCCATCATATCAGATTACACACACACACACACACACCATGGCACTAGCATAAAAGTCCCAAAATTACCTCATTGTGTAGCTAGCGATGCAGTTTTAGAAAGATGAGATTGTCAAGAAGTAAAAATTATACATAGAAGGCCAGCACACCAAGGGTGTACAAAATGGAAGTACATTTTCATAGGCACATTTTGCAGTTCAGTTGGGCCACACTTGACTTGTGGTTTCCTTATTATTT…
CUST_19346_PI417904088	C031R004	IDUA	IDUA	-	Alpha-L-iduronidase (EC 3.2.1.76)	IDUA	-	XM_014161533.1,100,100.000,60,2.54e-24	XM_021621848.1,100,98.333,60,8.25e-23	iduronidase, alpha-L- (idua), transcript variant X2	AGCACATCTACCACCACCGACCTCATTAGGGTCTCTCTCAAAGGATTCACAGGACAGCAAGGACTTGTGTATGTAACATATTACCTGGACAACAATGTGACCAACCCATCCCAGCTGTGGCAGAGCATGGGCAGCCCAGACTACCCCACAGCAGAGCAGTTCAGACAGCTGAGGAACATTGAGGATCCTCAGGTGGATGGACCTCTGCCCTTCCCTGCTGAAGGCATCCTGACCATGTGGGCCAAGCTCTATGTGCCCTCTGTCCTCCTCATACATGTGTGTGCCCAGCCCAAGGCCACACCAGACCAGGTGAATGGATTGCGATTCATCAGCATCACAAAAAGCCAAGTTATGATTGTGTGGAAAGATGATTGTGTAAATTCCAAGTGCATTAAGACA…
CUST_11270_PI417904088	C203R012	TMEM30A	TMEM30A	CDC50A	Cell cycle control protein 50A (P4-ATPase flippase complex beta subunit TMEM30A) (Transmembrane protein 30A)	LOC106573624	CC50A	XM_014148879.1,100,100.000,60,2.54e-24	XM_021574624.1,100,100.000,60,1.77e-24	cell cycle control protein 50A-like (LOC106573624)	ttggCGAAATTCCCTCCAAAGTAAATACACAATGCTTGTATTTTTAATTTTTTTAAATGATTACATTTAACGCTACGTAACATTATTGAGAAGATAACGGGTTGATTTACTGAGAAACGAAAGTTTTCTCGCGACAGCCAGCTGTCACTGTTGTTGACAGTGTGGATTATTTTGTTCGACGAGAACTGCAGCCATGATGGCGTCTAGCTACAACGCAAAGGAAGAGGACGGACACCAGCCTGGTGCTACTGGCCATGTATGCGCAGGAACTATGACAAATAAAAAGCCGGACAACACTGCGTTCAAACAGCAAAGACTGCCCGCTTGGCAACCTATTTTGACAGCGGGCACTGTTCTTCCTGCTTTCTTTGTAATTGGTCTCATCTTCATCCCCATCGG…
CUST_23663_PI417904088	C144R039	ATRAID	ATRAID	APR3	All-trans retinoic acid-induced differentiation factor (Apoptosis-related protein 3) (APR-3)	APR3	-	XM_014143630.1,100,100.000,60,2.54e-24	-	Apoptosis-related protein 3 (apr3), transcript variant X1	GGGGGGAAACAAGGAGACATGCGAGTGAAGCGGCAGTGATTTTAGTCGCTTACATGTTTATCTTGTATTGATCATATGACTATCGCGTTCAAAAATGACAGCTGGATCCAGCCAGCAGAATGCAGCAGGGGTCTTATTAATCATTCATTTATATTTATATGGGAGTTATCAACTGACTGAGTTACAGGTATGCCACCTCTGCAACGGAACAGTGCAGAATAGCACCGCTCTGGGTCAGTTCTGTTCCGCGTCTGCGGGTTTGATTGACGGATGCTGCTGCCTGCTGCGAAAGGAAAACACCAGCAATGCGGACTACATCATCGGGTTGGACCTATCAAACTGTTCTCTAAGTCATGTCGAGGACCTCCAAGAGGCATCAACAGCTGCAATGATAGATAT…
CUST_15157_PI417904088	C209R020	LAL	-	-	Putative lysosomal acid lipase/cholesteryl ester hydrolase (Acid cholesteryl ester hydrolase) (LAL) (EC 3.1.1.13) (Cholesteryl esterase) (Lipase A) (Sterol esterase)	-	-	-	-	0	aagtagcacgcttcgtatacatttgatttaaatacaatgtaacaacttccgcggcaactgacaaatttacctgctcctcgCGATTTGTCCCAGACAACAATAACTTTGTTTGGCATTTCTCTTCGCAGAAGACAAGCGCATAAACTGCATGTCAACCCTGCACCAACTATAAGAACTCGTGACATTGAGTTCAACTTAAACTATAAACAACTGTTGCTGGCAATACACAAATAATTTACTTTTTAAGTTTCGTTGCGCGTGTTTGGTAAAGCCAGATTTCACATAGTAGCCTAAAGATGAATGGCTGTTGGCCGACCAAAATGTTCCCTTGGATGCATGGAAAAAACAGTTTATTCAAGTAAAATAAACGTTAGTTTCTATTACAAAATCGCACTGTCA…
CUST_35340_PI417904088	C142R121	CCL2	-	-	-	LOC106600445	-	XM_014191805.1,100,100.000,60,2.54e-24	-	C-C motif chemokine 2-like (LOC106600445), transcript variant X2	atgattatatcgttttattgacttaacataaacacgcaatattGAGAAGAAAATTACAAATAAAAAGATAATTTAAGAGGTAGCAGGGTAGGCAATAGATACAAATTTTACTTTAACACAGACAAGCATGTTATTTACATGTACATTCTACTAATTTATGATGGCGCTGTTGAAGTGAGCAGGGATGTGGGTTATATGGTATTCAGATCAACCACTTGACTTACATACACTTTCAGTGTATTCTTTCAGAGCCAGCTTAAATACACTTCTACCCATATTTCTACCCTCGGCACCTGTTGCCAGGGCAGTAACCAGGGTTAGATTTTTAGTGAGGTGCGGATGCAGTAAATGAGCTTCAACTTTCAAAACATTTCTATACAACTAAAACAACATTAAAAT…
CUST_10767_PI417904088	C151R118	TMM77	DRAM2	TMEM77	DNA damage-regulated autophagy modulator protein 2 (Transmembrane protein 77)	TMM77	-	NM_001140482.1,100,98.333,60,2.41e-24=XM_014131729.1,100,98.333,60,1.18e-22	XM_021568726.1,100,98.333,60,8.25e-23	Transmembrane protein 77 (tmm77)	ttggggttttagttcagaaagcgtgacctaattcatcatctgggtcatgtagccttcatttaatcagagcgatctaaagaATAGACTAGAAATATTAGCTTTTTCTGCTTTCCCGCTGTTCATTGTTGGTCTTTTGTGAGACCGAATTTAGTGTGATGAGGTGACAACAAAGGAACCGCTTTTTTGAAGGTACAGTTTATTGCCGCGTACAGAACAACTGGGAACTCGGAAAAATACTCAAGCAAATAATGACGTCAGATTTTCAGGTCGGAAAGTCGGATCTCTGGAAATAAGCCCGAGTGTCCGAGTTTAAATTTCGATTTGGACTGACCGTTCGAATCAAGTTTTCCATTCGGAGCTCGTCTTTCTGCGTTCCCAGTCGTTTTGAATGCACCGAAG…
CUST_38184_PI417904088	C202R008	ADPRH	ADPRH	ARH1	[Protein ADP-ribosylarginine] hydrolase (ADP-ribosylarginine hydrolase) (EC 3.2.2.19) (ADP-ribose-L-arginine cleaving enzyme)	ADPRH	-	XM_014173511.1,98,98.305,59,4.25e-22	XM_021597319.1,100,100.000,60,1.77e-24	ADP-ribosylarginine hydrolase (adprh)	GCTTTCGAGCGGCCGCCCGGGCAGGTACGCCAGCCAGCATTCTTCCCTTTCACCACCAGTCTGATGCCAGAACACTGCTGGCAGCACTGGCAGAATGCAGATGGAACCAAGATACCCCCAATATCAGATTTTGAGGAAGTGGTTGGAATCTGGTGGTGGGATGCCAAGGAGAAGAACCCGAAGACCCTAGAAGACTTGGACTCCTACCCCCTAGTCCTCCACCAACAACTGAGGAACTTGTGCAATCACAAGTGAGAAGAGGCCTAGCGTTGGGTGAACTTCTGAGACGATGCAGGAGCTCCAGAAACCTCCTCCAGCTCAGCAACCTTGTGAGAAACCCAGTTGAATTGTTTCCTTGTATGGAGCTGAGCGGGATTGGATTCTACGTAATCGAAACTA…
CUST_17854_PI417904088	C022R122	CD83	CD83	-	CD83 antigen (hCD83) (B-cell activation protein) (Cell surface protein HB15) (CD antigen CD83)	LOC106605366	-	XM_014200898.1,100,100.000,60,2.54e-24	XM_021558595.1,100,96.667,60,3.84e-21	CD83 antigen-like (LOC106605366), transcript variant X2	ATATATATTATTGCCTATTTATTTGTACATGTTATGAAAGTATGGAAGTTATAGTTGCAAAATATCCCAAAATCTGAAAATTGACAGATGAAAGCAAAATCACAATTTTTGCCTGTGTTGTCGGCCTTGAGTAAAATACTTTAAAGAAAGTATTGTGCTTTTTACTCCATACAGAAAAATAGTTATGTATCTAGTTTGTAAGCCTCTGTAAAATGCTAGGGTAAGTAATTTATCTTAATAACATGAACTATTCTGAGTAACAATCAACGTTTCTAAGAGAAATATCACTTCTGTGGTGACTAAAAAAGTGAGGACTCTTCTTAAGAAAAAGTTAAAGAACATGTATCTAAGAACCATAGCACATGCACATCAGATACAGTAGGTTACAAAATTATTTAC…
CUST_15693_PI417904088	C044R160	PLEKHA1	-	-	-	PLEKHA1	-	XM_014158358.1,100,100.000,60,2.54e-24	XM_021564851.1,100,100.000,60,1.77e-24	pleckstrin homology domain containing, family A [phosphoinositide binding specific] member 1 (plekha1), transcript variant X2	CACAAATGGTTTAGATTTGTATGTACTTTTAAGATGTTAAATATATTTGATTTTAAGCAGACCATTTAGTTTTTATCCAAAGCATGCCGTTATGGAAGCACCGGACGAAATATGAAACCAGAATCTTAAAAATAACCTGTCGAAATTCCGTGCGCCAGTCTTGCTTTCAGGTGTTTTTTGGAGTGAGAGGGTCTTGTGTATATTTATGTCTTTAGTAATCCTTTAGAAATGCTTTGAGTCCTTATGTTCTAATGAAAGTTACACCTGTTGTGTTCGTTCAGACTCTGTCTTTCTCTCTCAATCATTCACACACACACACACACACACTGTCACACCTATGTGTTTTGCCAAATGTAAGTCCTGCACTGTAATGTTATGTGCCTGTCAATGTGAGCATGC…
CUST_31620_PI417904088	C170R065	MYT1L	MYT1L	NZF1	Myelin transcription factor 1-like protein (MyT1-L) (MyT1L) (Neural zinc finger factor 1) (NZF-1)	LOC106571614	-	XM_014144883.1,100,100.000,60,2.54e-24	-	myelin transcription factor 1-like protein (LOC106571614), transcript variant X9	GGGCTACATCTCACTAGCTGCACACATTACATTAGTTTACTTATGTGATGTCAGTCATAATTTTGGCTCCATGAGATAAGCATCAACCATCATGCCTTCTATGAGTTGCTCAAATCAATCTACACTGACTTTGCATGTTTTGGAGCTGCATTAGATCAACTGTAGTGTACATAGGACTATGTAAATGGTTACATTTTATGAAATTGATGAAGTATAGTATACACTTAGTACATCCCCAGTGACCATATTGTCCTTAGAATGTTTGCAGCTGTCAGTGTCCTTCCCTGAACAATTTCTCTTTCCCTCCTTTCCCTTCTCTTTGAAAGAAAATGAATTGATCATAAATATGAAATCCGACTGAATCTGATTGCGTATGTACCATTTTCCTCATTGGAGTCT…
CUST_33836_PI417904088	C156R022	TRIM16	TRIM25	EFP RNF147 ZNF147	E3 ubiquitin/ISG15 ligase TRIM25 (EC 6.3.2.n3) (Estrogen-responsive finger protein) (RING finger protein 147) (RING-type E3 ubiquitin transferase) (EC 2.3.2.27) (RING-type E3 ubiquitin transferase TRIM25) (Tripartite motif-containing protein 25) (Ubiquitin/ISG15-conjugating enzyme TRIM25) (Zinc finger protein 147)	LOC106573470	-	XM_014148551.1,100,100.000,60,2.54e-24	XM_021598834.1,100,100.000,60,1.77e-24	tripartite motif-containing protein 16-like (LOC106573470)	GACTCGGTCAGTTGTTCGATCTGTTTGGAGATACTAAAAGATCCAGTGACTATTCCCTGTGGACACAGCTACTGTATTGGCTGTATTAAAGGCTACTGGGATCAGGAAATGGTGAAGACACTGACAGAAAAAAATACTAAAAAGAAGAAGAAGAAGAAGACAAAACTCCAAACTGCTCCTCCTGCTCACTGTTATGCTGGACCTGGAGATGTTGATTGTGACGTCTGCACTGGGACAAAATTAAAAGCTGTCAAGTTCTGTCTGGTGTGTCTGGCCTCTTACTGTGAGACACACCTCCAGCCTCACTATGAATCTCCTGCCTTTAAGAAGCACAAGATGGTCAAGGCCTCCACACAACTCCAGGAGAAGATCTGCTCTCATCATGACAAACTACTGGAG…
CUST_2220_PI417904088	C020R079	GLDC	GLDC	-	Glycine dehydrogenase (decarboxylating), mitochondrial (EC 1.4.4.2) (Glycine cleavage system P protein) (Glycine decarboxylase) (Glycine dehydrogenase (aminomethyl-transferring))	LOC106585394	-	XM_014171546.1,100,100.000,60,2.54e-24	XM_021605565.1,100,98.361,61,8.25e-23	glycine dehydrogenase [decarboxylating], mitochondrial-like (LOC106585394)	tggtaccctgcaggtacggtccggaatcccgggtcacccacgcgtccgAGGTCTACCTGGATGGTGCTAATATGAACGCACAGGTCGGCCTGTGTCGTCCTGGTGACTATGGATCTGACGTCTCTCACTTGAACCTCCACAAGACCTTCTGTATCCCCCACGGAGGCGGAGGACCAGGGATGGGACCTATTGGAGTGAAGGAGCACCTCGCCCCGTTCCTGCCTAGCCACCCAGTGGTCTTAATGTCAGCAGGCAACATGTCCAGCTCCCTGGGCACCATCAGTGCTGCCCCCTGGGGCTCCAGTGCCATCCTGCCCATCTCCTGGGCTTACATCAAGATGATGGGAGCCAAGGGGCTGGTTCACGCCACAGAGGTGGCTATCCTGAATGCCAACTATA…
CUST_31706_PI417904088	C207R073	IFIT5	IFIT5	ISG58 RI58	Interferon-induced protein with tetratricopeptide repeats 5 (IFIT-5) (Interferon-induced 58 kDa protein) (Retinoic acid- and interferon-inducible 58 kDa protein) (P58)	LOC106578964	-	XM_014158292.1,100,100.000,60,2.54e-24	-	interferon-induced protein with tetratricopeptide repeats 5-like (LOC106578964)	ACAGAATTTGGCATCCTTTAATTGATTATATGGAGAATCTCCCCTCACATCACATTGATTGCGTCTCTATATAATCCTCACATAATGTTTCACACGTAATGTATAATATGTAGCTTACGGCCAATGTCTCATTCTTTTTAATTTTTTTATTATTTCACTCACATTTTTGTCTGTCATCTTGAAAGGTTATTGTCACTTTGTTATATTGTTGTCCAATATCTTCTCCTTTTTTTATGTTCTTAATCGGAAAATGCAAAAATAAACTATAAAAAAAGTGTATTGTAAATAAAAGTGCAGTAAATGCCTGTAAACCTAAAAGCACACGTAGAATACAATAATATACTTCAATTTCATAACTATATCTTCAAATGACCCAAACCATATTTCCACACACAAACA…
CUST_31691_PI417904088	C010R130	GPR155	GPR155	-	Integral membrane protein GPR155	LOC106581752	-	XM_014164016.1,100,100.000,60,2.54e-24	XM_021579007.1,97,98.276,58,1.07e-21	integral membrane protein GPR155-like (LOC106581752)	TCAGCTTTAATGTCAGCATCATCAGCTTAGTTACACTGGTTTGGACAGTAACTGTCATGTTCCTGAGTAAGAAATTCAAGAGACTACCTCACATGTTCACCCTCAACCTGTTCCTGGCACAGATTCTAGCTTGTGTCGGCATGATCTTGTGGAACTTTGTCGTGCGCCAAGACAGCTTCATTGGACACGTGTTGACGTTCACACTGTTGTACGGCTCACTGTACAGTACTTACGTGTGGCCAGGTCTGATAGCGCTTTCCCTTGTGCTGATGAAGAGGGGTGGTGAGCTGAAGGTTGCGCCAGGCTTCCTGGTGATTGCAGGCTGGGGAGTCCCAGGCCTTGTGGCAGCAGTGCTCCTCATAACTGGGGAGAGGATGCCTGACACCATCGACTCGGCGT…
CUST_5989_PI417904088	C005R090	RNT2	RNASET2	RNASE6PL	Ribonuclease T2 (EC 3.1.27.-) (Ribonuclease 6)	RNT2	-	NM_001140972.1,100,100.000,60,5.18e-26	XM_021582054.1,100,96.667,60,3.84e-21	Ribonuclease T2 (rnt2)	gggggacattagcagggaactgtcattgTAGATCAGTCACACATGATCAGTCACTCTCTCTGACTAGCATCAATATGCTTTCACCAGTGCTGCTCATGGTGGCCTTGCTGACTGTCCTTACCGTCACCATGGAGTCTGACCACTGGATAACAGACCAGCAGGAAAAGTTCTGTACATGGCAGTGTTTGAAGTTTACTCTGCAGTGGCCTGGGAGCTTCTGTTTGGGTCTAAAGAATTCATCACAATGCAGAATACCTCCAAACATCCAGACCTGGACTATCCATGGACTGTGGCCTTTGAAAGCTCATACATGTTGTCTCTGCTGGCCAATATTCCACTCTGACCTCAAGGAACTGGACCCTGAACTCTCTCAACTTTGGCCATCCCTACTCAAGACCC…
CUST_32064_PI417904088	C248R150	CD209	CD209A	CIRE	CD209 antigen-like protein A (Dendritic cell-specific ICAM-3-grabbing non-integrin) (DC-SIGN) (CD antigen CD209)	LOC106573404	-	XM_014148424.1,100,100.000,60,2.54e-24	-	CD209 antigen-like protein A (LOC106573404), transcript variant X4	GTGTATTCTTCTTTTATTTAGAAATCTGGAAACAAGTGGAGTCATACATCCATACTTTTGGTATAAGATATAAAAAGACTCAAATGACAACAAAACAAAATAAAATAACATATTTTGGGGTTATTATAGGGTAATAGCAGTTGTACTAAGCTAATTAGGCATTGATATATATATATATATATATTTATTTATTTATTTAAACAATGGGGAAATATAATTAATCAAAATTATAATTGAAATGATAATCTAATAATTTGATGCAATAGTCCAAGCAGGAGTTGTAAATAAAAGCATATACAGTATATTACTTGATGGTCCATGTAACCTATAAAATAATGCAGTTTGAATGCAGTTATATATGCCGTTTGAGTTACGGATAAGCCACTTTCTCACAGATCC…
CUST_10512_PI417904088	C149R157	PICA	PICALM	CALM	Phosphatidylinositol-binding clathrin assembly protein (Clathrin assembly lymphoid myeloid leukemia protein) (rCALM)	PICA	-	NM_001173712.1,100,100.000,60,5.18e-26=XM_014197891.1,100,100.000,60,2.54e-24	-	Phosphatidylinositol-binding clathrin assembly protein (pica)	ttggtaaattacagcctcaaatcaagtcgtggatgtggggtgcatatatcaccctgggatttaacgttcctgccgtcaaaATTTCTCCCCTCTCTTTATTTTGTGTCAGGTGGCTGGACTGTGGAAGCTACAGAGGACAATATCGATTCCACAGGATTTGAAACATTTGTTCTATACTTTATACAAAAGTGCGAAGATGTCTGGACAAAGCATTACGGATAGGATAACTGCAGCTCAACACAGTGTAACCGGCTCCGCTGTGTCCAAAACTGTGTGCAAGGCGACCACGCATGAAATTATGGGACCAAAAAAGAAACATTTAGATTACTTGATCCACTGCACCAATGAGATGAACGTGAACATCCCCCAGCTGGCAGACACCTTGTTTGAAAGGACTGC…
CUST_24417_PI417904088	C114R089	SLC25A35	SLC25A35	-	Solute carrier family 25 member 35	SLC25A35	-	XM_014195892.1,100,100.000,60,2.54e-24	XR_002475098.1,100,100.000,60,1.77e-24	solute carrier family 25, member 35 (slc25a35)	aacatggcaaggacACAGTTTAAAGGACAGACGAGAGGAAGGAATACTGAGTAGAAATAACCACAATGGAACATACAAACTATTTTTAGGGCGCGACCGATTGTTTATTATCGTCCCGCAGTAGTCTGTGACCTTGGGATTTTGACAGATTTAGCTTAGAACCGGCGATTTGGAATTCTACATATCCTTCATATACCGAATTTCATTTAGCTAAGGTCGAGCCCATTTAGCGATGGATTTTATATTGAGCGGGGCAGCTGCCTGCGGAGCTTGCCTGTTCACTAACCCGCTGGAGGTTGTCAAAACTCGGATGCAATTACAAGGCGAGCTCAAAAGCCGGGGGACCTACCAGATTTACTACCGCAACGTTTTCCACGCTTTTTACACTATCGGCAAAGT…
8_4_4_10	C169R036	SLC44A2	SLC44A2	CTL2	Choline transporter-like protein 2 (Solute carrier family 44 member 2)	SLC44A2	CTL2	NM_001140367.1,100,96.667,60,1.12e-22=XM_014193512.1,100,100.000,60,2.54e-24	XM_021625021.1,100,96.667,60,3.84e-21	Choline transporter-like protein 2 (ctl2)	gggtgtatgtATGTTTACATATGTTTATTTTAGTTTCAGAACTCCACAGGCACTTAAACAGATCCACATACACAACCCATATTTTCCCCTGCTTTCAGCTTCACACCATCTTAATACATTTCTTTACCGCTCATTCCCTGGCAAATACAACAGAGAGCAAGCATTGACATTTAACAGCAGGTTAAAAAAGGGGCTACAGTACTGTATTAATGGATTTGGTAATGACAAAGCGTAGAAAATATTGCAACAAATATAAAGTAAAATGTATGTCTTAGTACTGCATGTATTAAAATAATTGCATAGGTTACATACAAAAGTGCTGCTTTATGTAGATGTATAAAATACTTTACTAAATAGATCAGTTCTGTGCTCACCTTCATGTAACACACTCCAAATAAT…
CUST_3910_PI417904088	C002R059	PAPL	PAPL	ACP7	Acid phosphatase type 7 (EC 3.1.3.2) (Purple acid phosphatase long form)	PAPL	ACP7	NM_001140103.1,100,100.000,60,5.18e-26=XM_014169288.1,100,100.000,60,2.54e-24	XM_021574437.1,100,98.333,60,8.25e-23	acid phosphatase 7, tartrate resistant [putative] (acp7)	TCTTTTTTTTTTTTTTTTTTTTTTTTTTTTTTTGGAAAGACAGGATTTATTGATATAGTTAAAAGTCTGATGCCTTGTTTTACAGTACCATTCTTAACAAGACAGTAAAATAAGATGATTTACATTGATCATAGCATTTTTCTATTGGTTCTTTAAACAACAGTTTGTTTGTTCCTTTCTCACTAACAATATACATTTTTTTATGTTAAACATTTAACAGATACATATAAATCTAAGTAGCAATATGAGTAGACTGTTATAAAATGTAGGCCCCTTACAACCATTTGTCAGGGGAAACTAATCACATTGTGTCCATTCGAATGAAACTAAGATGTATAGAGTTATGATTGTGATCTACTGTATAAAATAACTGTCACCTCAGGTTTGGGCCTCTCCCAC…
CUST_8683_PI417904088	C047R122	SCARF2	-	-	-	LOC106564266	-	XM_014130319.1,100,100.000,60,2.54e-24	XM_021602725.1,100,96.667,60,3.84e-21	scavenger receptor class F member 2-like (LOC106564266), transcript variant X2	GGGGGGGGCAGTGCAGAGTGTCCTGAGGAAAATGGGCAATTTCCGTGTTGACCGGAAAGCTGCAATCCCGAAAGAGTCCCCAGAGAAGAGGCCCAGCTTATCCCTAAACAGGGAGGTTAACCAACCGAACATACACTCTGAGGTAGCCTCCCTCTTAACTGCTCAGCTGAAGGAGAAGACTCAGAGTCTGAACAGGAGCGAGAACGGCAGCTGTGAGGAGAGCCTGTCTCACCTCCAGGTCCAGAGAAAGAAGCCCACCCCGCCCCAAAAGACCTCGGGCACCCAGCCTGGAGCTGGAAAGGATTTGCTTCCCACATCCGACAGCTCACAGAAGCCTCTGCCAGATAGTCCATCTAAAGAAGCCAAATACCAAGAGAAACAAGACTCTAACAACTCTGA…
CUST_13386_PI417904088	C041R120	STAT1	STAT1	-	Signal transducer and activator of transcription 1-alpha/beta (Transcription factor ISGF-3 components p91/p84)	LOC106586142	-	XR_001324136.1,100,100.000,60,2.54e-24	XM_021596982.1,100,93.333,60,8.31e-18	signal transducer and activator of transcription 1-alpha/beta-like (LOC106586142), transcript variant X3	TCAGACTGCTGGTGAAGCTTCAGGAGTTCAACTACCAGTTCAAAGTCAAAGCTCTGTTTGACAAGGACGTGACTGAGAGGAATACAGTGAGAGGGTTCCGGAAATTCAACATCTTTGGAACTAATTCTAAGGTTATGAACATGGAGGAGTCCAATGGGAGCTTGGCAGCAGAATTCAGACACCTGCAACTAAAGGAGCAAAAGGTTACAGGCAACAGAACAAACGACGGTCCTCTCATAGTGACAGAGGAGCTCCACTCCATCAGCTTTGAGACACAACTCACTCACCCAGGACTCCAGGTCAACCTGGAGACGACGTCCCTGCCCATTGTGGTCATCTCCAACATTAGCCAGCTGCCCAGAGCCTGGGCCTCTGTCATGTGGTACAACATGCTGACCA…
CUST_25887_PI417904088	C069R105	-	IGKV3-11	-	Immunoglobulin kappa variable 3-11 (Ig kappa chain V-III region VG)	-	-	-	-	0	ctgacacgcagcacaatgatgatgtcactgattctactgttgtggacactggggctccttgttcagGAATCATCAGCAGATATAATTCTGACTCAGTCTCCTAAATCTCAGTCTGTTAGTCCAGGAAAGACTGTCTCTATCAGCTGTACAGCCAGTTCATATATTAGTATTTATATCCAATGGTACTTGCAGAAACCTGGAGAAGCTCCTAATCTCCTGGTTTATGATGCTACAAACCGTCAGTCTGGGATTCCAGGTCGTTTCAGTGGGAGTGGATCTGGTTCTCAATTCACTCTGACCATCACTGGAGTCCAGAAAGAAGATGCAGGAGATTACTACTGTCAGCAGCGTAACAGCTTTCCGTTCACACGGTGTTGGAACGTCGTACAAAAACCTCCC…
CUST_18655_PI417904088	C133R068	MAP7D1	-	-	-	LOC106605129	-	XM_014200470.1,100,100.000,60,2.54e-24	XM_021595446.1,63,97.368,38,1.40e-10	MAP7 domain-containing protein 1-like (LOC106605129), transcript variant X5	aaatgagtaattgttgttattattatgctgacgagtTGAAAGAAGTGAGTTGGCTTTTTGTTTCTAATGTTTAGTTTATTTAACAGAAATGTAAGGACTGGGTACAGTTGTATGTGAATAATGTAAATGAAAACTTGAGAGTTGGACTAAATGAGGGAGGGGTCTGTGGAATAAATTGTGTGTGAATTTATGAAAGGAATCCCATTGTTTACTTAACTCCTGCCTTTCAAGGTTTTCCCAGTAACTAATATGTATTGGAAACGTAATGATATGGTCTCTATAAACATATTTGTAAATGTTCTGTAAATGGAGCTACACTGCAAATAGAATGTCTCCAAAATACTGAAGAACACGTTTGACAACGTTTTGACAATGTAAGAATTACATTGTTGCAGCACA…
7_3_1_4	C223R022	FN1	-	-	Fibronectin (FN) (Fragment)	LOC106582526	-	XM_014165706.1,100,100.000,60,2.54e-24	XM_021580047.1,100,98.333,60,8.25e-23	fibronectin-like (LOC106582526), transcript variant X3	ggggagggcggtcaCATGATGAGCTGTACCTGTTTGGGAAACGGGAAGGGAGAGTTCAAGTGCGAGCCACATGAGTCGACGTGTTATGACGAGGGTAAGATGTACCAGGTGGGAAACCAGTGGCAGAAGGAATACCTGGGAGCTATCTGTATCTGCACCTGTTACGGAGGACAGCAGGGCTGGCGCTGTGAGAACTGCAGAAGACCAGGAACTCAGACTGAGGTAGATGTGGATCTGCTACAGCCTCAAATACACCAAGACGCATTCGACCGCTACAGGGAGAACGCCCTGAAGAAACTGAACATCCAGTGCCCTATAGAGTGTCTGAGACCAGAGCTCCTAGCAGACGTACAGCAACCCTCCGAGTAAAGGAGAGGAGAACAACATCCTCTTCCTCCT…
CUST_40542_PI417904088	C158R014	LGALS9	LGALS9	-	Galectin-9 (Gal-9)	LGALS9	-	-	XM_021622417.1,97,98.276,58,1.07e-21	VHSV-induced protein-9 (lgals9), transcript variant X1	cagtttgaagctggtaaaatacacaaaaacaggaagcatataactataacagatctaccgcttcttagacttgctttcaaTTAGAGAGACAGATCTATAAATTACATTTCTATGTGAATTTGGTGGGGTCGCCCAAAAGGTGACATTGCAGCTTTACTGAAGAGAACCACATCACGTCTACGTGCTGCTTTGAACAGACAGATCAGAGCAACATTGAAGCATGACTTTTCAGCAACCCTTCTTCAATCCGAGAGTGCCGTTCACTGGCTGTATCCAGGGAGCTCTGCATGAGGGGAAGACCATCACTGTGACAGGGAGAGTCCTGCCAGGAGCCCAGAGGTTTCATGTGAATTTGCAATGTGGCTCAAGAGGAAATCCTGACATAGCCCTCCACTTCAA…
CUST_18763_PI417904088	C184R037	ACLY	ACLY	-	ATP-citrate synthase (EC 2.3.3.8) (ATP-citrate (pro-S-)-lyase) (Citrate cleavage enzyme)	ACLY	-	XM_014204092.1,100,100.000,60,2.54e-24	XM_021624820.1,95,98.246,57,3.84e-21	ATP-citrate synthase (LOC106607281), transcript variant X4	CAAATTATAGCACATTTATTTTATGATCCGCGACACCGGAAGAACCAGACAGAGCTGTGTTCCAACAGGTCATCTTTAATATACTCAGTCACACCATTCTGAAAATATATTACAACACATCTCTACAGAGGCACGTTCAGTTCACTAATCACATTAGGTCAAACAAATGGTGTTGACATGACGACACAAATAGTACAGACAGATACATCTTTACGAGAAATAGCCGGTCACAACGGAGCTAGTCTAGCTAGTAACGTTCAGATAAATAATGCTGCATTCTATGGTACCTTTGCCATCCTGGACACCGTCCCGTTTGGGACACAGGATGAGCTTCTCACTGTATTTACAGCCCAATGTGCTTGGTCAGCTGCATATCTTACGGTTTAAACACAACCGTTT…
9_3_22_3	C209R041	PSAPL1	USP39	-	U4/U6.U5 tri-snRNP-associated protein 2 (Inactive ubiquitin-specific peptidase 39) (SAD1 homolog) (U4/U6.U5 tri-snRNP-associated 65 kDa protein) (65K)	LOC106585263	-	XM_014171295.1,100,100.000,60,2.54e-24	XM_021606086.1,100,96.667,60,3.84e-21	proactivator polypeptide-like (LOC106585263)	ggggggaaacctggagttttggaggtgtgcaatcagtaaaatcaacgcaaccctggatttagttatattattatcagctcTGTTTTTTCATATATTAACACGATGGTCTCTGTAAAACGGGAGAGAGAACTTGACTTGGAAGACGATGAAGCTACAGTGCCTGTGAAAGTAGGCCGTTCATCCGAGGATCGCAGAAGTCGCCACTGTCCCTACCTTGACACAATCAATAGGAGTGTGCTGGACTTTGATTTTGAGAAGCTGTGCTCCATCTCGCTCTCCCACATCAACGTCTATGCTTGTCTCATCTGTGGGAAATACTTCCAAGGTAGAGGTTTGAAGTCCCATGCCTATACTCACAGTGTGCAGTTCACCCACCATGTGTTCCTCAATCTGCACACA…
CUST_41467_PI417904088	C106R161	TAPBP	TAPBP	NGS17 TAPA	Tapasin (TPN) (TPSN) (NGS-17) (TAP-associated protein) (TAP-binding protein)	TAPBP	TPSN	NM_001123605.1,57,100.000,34,1.47e-11	NM_001124553.1,100,100.000,60,1.55e-26	TAP binding protein (tapbp)	ttggggggaagtccgaagacaacatcatatttctccatgctttaacaacttcAAACTACACCAGAACAGCCGATAACACTGTCGAAGACAACCATGGCCAATATTTCAACAATTTACAAGCTATCGTTTCTCGCCTTTACTTACTTCATACACGTCTATGGGACAAGCTGTCCAGTTCTGGAGTGCTGGTTTGTCCAGGAGAAACCAGGTCGAGGTGGGGGATTCCCTGCTGCAATGATCCAGGAGAAGTCACTACTGTATATCAATACAGACCCAGAGAGTGAAGAAACCAAGTCACAGCAGGGACCATCTGCAGACATCAACCATGATAGAGTCTACTACGTCACTGACCCAGCAGCCATCCTCTGCAGTTCCTCTCTGCACCCACCAGAGGGCTCA…
CUST_29427_PI417904088	C247R068	TRIM35	TRIM25	EFP ZFP147 ZNF147	E3 ubiquitin/ISG15 ligase TRIM25 (EC 6.3.2.n3) (Estrogen-responsive finger protein) (RING-type E3 ubiquitin transferase) (EC 2.3.2.27) (RING-type E3 ubiquitin transferase TRIM25) (Tripartite motif-containing protein 25) (Ubiquitin/ISG15-conjugating enzyme TRIM25) (Zinc finger protein 147)	LOC106608979	-	XM_014207267.1,100,100.000,60,2.54e-24	XM_021577768.1,100,100.000,60,1.77e-24	E3 ubiquitin-protein ligase TRIM39-like (LOC106608979)	TAAAGGATGCCCATATGATCCCAGAGTAAAGGAAGTTCACATCATCTGAAAGGTTAAAGGACTCCAGCTCCAGACATGGCCTTCTCTTCCTTACACACTGTCAAAATGGACACCCCTATTCTGATCAAGCACCATCTCTACTGCTCTATTTGTCTGGACCTGTTTGAAAACCCCGTCACCACCCACTGTGGCCACAGCTTCTGCAAGTCCTGCCTGGGCCGCAACCTCCACTTGAATGACCTCGCGTGCCCCCTCTGCAAGGAGCATCTGAGGGGTAACCCGCAGGTGAACATCATCCTCAGGTCCCTAATCCAAGAACTGAAGAAGGCCCAGGAAAGGAAGCCAGGGGAGTATTCCGGAGCCTTGGGCGAGGTGGCCTGTGATGTCTGCACTGAGAGG…
CUST_13310_PI417904088	C235R048	SLC15A4	-	-	-	-	-	-	-	0	GATTACATTTACTGTACACTCACACATCCTCACATGAGATCAAGTTCATCTGAATGTTTATTTATTGTACAGTAACCTTATTTAAGTGATCATTACTGTGTCTGAACCTGTTCTATCTGCAGAGGTCAGGTTGCCCTTGAATACGAATGGTGTAATTTATAATCATTTAAACCAATTATTTAATGTAAGCTGCTCAAATAACTCACTCCTGTTGTCAGATAAGTATGGCATTATACAACTGAGTGGCCTTTTCACTCTGATCATAGATCAATGAACAATTTAAAACAAACCCCCCAGACACACAACTTTGAAAAACCTTAGAGGCTTCATCGACTTGTTATTGACTGATCTGGTTTGTACTTGTTTGTTTGCTCTTAAAGCCTTTCTTCTTGTAGAGGA…
CUST_35143_PI417904088	C030R016	CDH13	-	-	-	LOC106571918	-	XM_014145477.1,100,100.000,60,2.54e-24	XM_021615579.1,100,95.000,60,1.79e-19	cadherin-13-like (LOC106571918)	gGAAAATATGTTTGTTTCATTGAAACCGTGAATTGAGATGCATGAAAATATACCACAGAACTCTGCATTACTACATAAGTAAAACTAAATGAATGTAAAACAATTACCTTTACCTAGATACCAATAAACACATATAGAATATACATTCAAAGCCAACACCAATACACACAAATTAATCAACCAGACTTCAGCGCAAAACTTTCAACCCAAGCTTTCACTGGTAATCCAAGCGCGCCCCCATGTATATAGATGGAGCTGTTGTGGAACAGGTTGAGGGCTTCAAGTTCGTTGGAGTCCACATCACTAAGGAACTATCATGGTCCACACACATTTGGCATGGCATAGGCCCTCAAATCCTCAAAAATGGCTACAGCTGCACCATTGAGAGCATCTTGACCG…
CUST_28793_PI417904088	C176R039	PLK4	PLK4	SAK	Serine/threonine-protein kinase PLK4 (EC 2.7.11.21) (Polo-like kinase 4) (PLK-4) (Serine/threonine-protein kinase Sak)	LOC106610996	-	XM_014210781.1,100,100.000,60,2.54e-24	XM_021584928.1,100,96.667,60,3.84e-21	serine/threonine-protein kinase PLK4-like (LOC106610996), transcript variant X5	TTGGGGAGATGTGCCATAATGGAGAGATGAGTCGATACCTGAAAGATAGGAAGATGCCCTTCTCAGAGGGTGAAGCAAGGCACTTCATGCATCAAATAGTGAAAGGTATGCTGTACTTGCATACACATGGCATCATGCATCGGGACCTGACCTTGTCCAACCTGCTGCTGTCAGGCAATATGAACCTTAAAATAGCTGACTTTGGCCTGGCCACCAAGCTGAAGCTCCCCAGCGAGAAGCACTTCACCATGTGTGGCACACCCAACTACATCTCCCCAGAGGTGGCCACCCACAGTGCCCACGGCCTGGAGTCTGATGTCTGGTCTCTGGGCTGCATGTTCTATGCCTTCCTGATGGGCCGGCCCCCGTTTGACACAGACACGGTGAAGCACACCCTCA…
CUST_25331_PI417904088	C102R112	DHCR7	DHCR7	-	7-dehydrocholesterol reductase (7-DHC reductase) (EC 1.3.1.21) (Sterol Delta(7)-reductase)	DHCR7	-	XM_014126597.1,100,100.000,60,2.54e-24	XM_021585986.1,98,94.915,59,6.42e-19	7-dehydrocholesterol reductase (dhcr7), transcript variant X1	aaagaaatcagaATGTTAGGTTTATTTACTTTTCTAAGTTAACACTTTAGGAAAGGCAGATAAGGTAAAAAGGGCAAACACCTGAAATCAAATGGCAAAAACACTGTTGGATAAAGTAAATGCACTATTAGCACAAAACTTCAAAATAACAGGCACCTCAAACATATTGACAGGCATAAAGACAAACGAATTCTGGCAGGAACAATCATTGTATAGTTGTAACTGCTTCTTGAACATAATATACTAGTCTGCTGCTAGCATCATGGATAATGCTGTGCTGATCCCTAAGCAGAAGACATTTGTCATCGACAGTGCATTGTCAAAAAAAAAAAAATTCTAGATTATTGCTCACTTGTAGCTGTAGTTACTTTACCCATGGCAACTAACTGCTACTGTATG…
CUST_21126_PI417904088	C202R068	GRAMD3	GRAMD3	GRAMD2B-GRAMD3 NS3TP2	GRAM domain-containing protein 2B (HCV NS3-transactivated protein 2)	-	-	XM_014137425.1,100,100.000,60,2.54e-24	XM_021602182.1,100,98.333,60,8.25e-23	GRAM domain containing 3 (gramd3), transcript variant X2	accgaacaaccggacagagatctaactccgttatctacgccagaacaagttgtaaagtctgtcaaaccggtcagaaaagaTCCGAGGGGGATCCAATCGACGTCGGAGGCAGCGAATGGAGGAGAGGACAAGCCCAGGAGGAGTGCCAGTGGGAGGTCTGCTGGGGACACTCAGGTGTCAATGGACACTGAGTCAGACCTCTCAGAGAGCAGGAAGAAACCACCCCTCATGAAATTTAAGGCTGTGGAGCTGCCTTCCCCGATGCAAACTCCAAGTGACGGTGAAACTAAGTTTGAAGGAAGAAAGAAATCCCAGTCCAGTCAGATATCCAAGACAAATGCCCAGTACCATAAAATATTCAAAGAAATCAGCAAGGATGAGTTACTGAAACAAAGTTAC…
CUST_6003_PI417904088	C065R028	TSN7	TSPAN7	MXS1 TM4SF2	Tetraspanin-7 (Tspan-7) (Cell surface glycoprotein A15) (PE31) (TALLA homolog) (Transmembrane 4 superfamily member 2) (CD antigen CD231)	TSN7	-	NM_001141561.2,100,100.000,60,5.18e-26=XM_014212158.1,100,100.000,60,2.54e-24	XM_021583804.1,100,98.333,60,8.25e-23	Tetraspanin-7 (tsn7)	gggggGTCGACAAAAGTTTTCCAGCAAGACGTTGTGGAAGTGTTTTTTTTTCTCTCTCGCTTTGTAACAACGATACTTTTTGATTGCCAATTTCTGCGAAATAGACATAATGTCTCCCCCATCAAGAAGGCTTCAAACTAAGCCAGTGATTACATGTCTCAAGACCTTTCTTATATCTTACAGTCTCATATTTTGGTTTACAGGGGTTATCCTTCTGGCAGTTGGAGTATGGGGGAAGGTGAGCCTGGAAGCTTATTTCCAGCTGGCCTCTGAGAAGAGCACCAATGCACCATATGTCCTCATCGGGACTGGAGCCATCATCATCATTTTTGGCCTGTTTGGTTGCTTCGCTACATGCCGCGGTAGCCCATGGATGCTGAAGCTGTATGCCATGTTCCT…
CUST_28143_PI417904088	C217R160	COL4A3	COL4A3BP	-	Collagen type IV alpha-3-binding protein (Ceramide transfer protein)	LOC106567816	-	XM_014137589.1,100,100.000,60,2.54e-24	XM_021601303.1,100,96.667,60,3.84e-21	collagen type IV alpha-3-binding protein-like (LOC106567816), transcript variant X2	CGCGATCCGACAGGCGTGAATATGGCGTAGCTGTCAGACGCGCTAGAAAGACAAATATTTACTGATATAAAGATGTTTTCGTCGTAGTAAATACGGGATTTTATTGCATTTACCAAGTCAGATATTCTTTATTTCAACTAGCTGCTAGTGTTTTGAGTATTTCAAGCTGGATGGAAGGTTTGCGGCTAGAAGAAAACATAAAGGGGCGGGTGCGAGTCATTCCTGGCTAGTTCCTACCTGACTAGCCACTCCGCTATCGTTATAGCTTATCTAACGTCACAGGCTAGTGACACAAACAGCCCTCCAGCTCGACTGTCAGCCAACGTTCGCTTCCTAGCTAGCTAGCTAGCTAGTTAGCTAGACAACACTAACAATGTCGGATAACCAGAGCTGGAATTC…
CUST_32771_PI417904088	C007R050	ARHGEF10	ARHGEF10	KIAA0294	Rho guanine nucleotide exchange factor 10	ARHGEF10	-	XM_014150449.1,100,100.000,60,2.54e-24	-	Rho guanine nucleotide exchange factor [GEF] 10 (arhgef10), transcript variant X2	TGCTGCTGGTGGGGACCAACCTGGGGGTGACAGTGGCCCTCTCTGTCCCCAGACTACAGGGAATCCCCAAGGTCACAGGACGGGGCATGGTATCCTTCCACGCCCACCACGGCCCAGTAAAGTTCCTCACCATGGCAGCCGCGGTGTGCAACCGGCCCTCCGGCAACCCAGGCAGCCCAGGCAGCAGCCTACCTAGCCAGCCAGGAGACACCAAGGACGGGGAGAAGGCCCAGGTCTGCCAACCTCCAACCCCAGGCTCCACACCCGCTCTAGCTCCCACCCAGGGCCGGGGAGTGTGGCTGGGAGAGGCAGGCTGCACCTCCATGGCCATCCAGGACTCCCTGTCTTCCTCCTGTGGCTCCCTGGCTCTGTCCCAGGGCTCTCTGGAGCACGGGCCCG…
CUST_20487_PI417904088	C172R002	SLC25A30	-	-	-	-	-	-	-	0	ATGTATGCCTTGCTTTAAATCAGGATAACAGAAGTATTTACAGGGCTATGACAGTGACACATTGGAATTAAGGCTTTGGGGACTATAAACAAACCATATACAAGGACCATATTGTCACATGAACACACTCCGAGGTTCAACCTTAACTCTTTAAAAATAAAAAATAAACTAGCAAGCTCACCTCCAAACGATCTAACTGATAACAGACTGATAATGGTGAAGAACAAAGTAGAAGAAGTGAAGGGTAACAGAGGATTAACAGTTAGTTGACATGTACATTTGTTCTGTCTTGGGATCATAAAATGGCACGTTAACAACACCAGCACACAGAATGGCATTGGTAGTCAGGTGCAATGGCTAAATATACAACAGCCACCTCTCTTGACACATCAGCCTGAC…
CUST_1790_PI417904088	C082R018	VDAC2	-	-	-	LOC106568273	-	XM_014138449.1,100,100.000,60,2.54e-24	XM_021622865.1,100,93.333,60,8.31e-18	voltage-dependent anion-selective channel protein 2-like (LOC106568273), transcript variant X4	CAAGTCAATGTGTTTATTTATTAGAATTCCATCACTTGAAGTTGGAAAACATTTGGTACTGTGTCTAAACACACAAAATCAAAGAGATTCACAATTATGTCAACAAATGGAAAGAAAACAAAGATACATGGATACCTGGTTTATGACTTGGTAAAGGAAAGAGGGACAGTTGAGTTCCACACAACGGCCTCTGACATGATCCCTTCAAGTGTTTTCTGACCGTAGGAGTGTTGAAACTAAGAGGAGAATATGTATACTATGTACAGAGAGTGGGAATGACAGGGAGTGTTGATTGGCTCCCAATGGGACCAATGACAGCCAGGAAGGGGTGTCGGTCCAAAGCAGCATGAGCAACAACAACATTCTAGAATGGCGCCAAGATACTCATTTTACAACAGA…
CUST_3364_PI417904088	C011R061	ITGA5	ITGA5	-	Integrin alpha-5 (Fibronectin receptor subunit alpha) (Integrin alpha-F) (VLA-5) [Cleaved into: Integrin alpha-5 heavy chain; Integrin alpha-5 light chain]	LOC106583616	-	XM_014168000.1,100,100.000,60,2.54e-24	XM_021610605.1,95,98.246,57,3.84e-21	integrin alpha-5-like (LOC106583616)	ttggCAACGGGCCCAGTATGATCAGTCAGTCAGTGCTGGAGCTGCGCTGCCCTCTGAGATCTCATGGTCACGACCTTTTGTACCCTCTGGAGGTCATCACTCAGGGACCACTCGACTGCAGCTCCAACCACACCCTCAATGCACTGAAGCTCAAGCTCCAACCTCCTACAACAGAGCAGCCACCCTCACCACTGACGGCCAGCCCTGAACACCACATCCAGAGGAGAGAGGTCTACAGGGATCCTCTGGATGAACAAGGCAACCTGTCGTGTTCTACCGCTGAGTGCTGGAGGCTGCGCTGTCATGTGGGGTTACTGGAGAGAGGAAGCAGTGTCATTCTGACCGTCCGCTCACGCATCTGGCCTGAGACCTTCCTTGAGAGGGCATACAAGCAGTATG…
CUST_36815_PI417904088	C065R054	TFE3A	TFE3	-	Transcription factor E3	-	-	-	-	0	GGCAGGGGCCTCCTCTTTTGAGCTGTCAACCTGGCTTCCTGTTCTACAACATTATAAAACGAGGACATTTATTGTTCTTGACAAAGTAATTGTTGTTCGTCATATTGATTTCTGCGTAAACTGCAACGTTTTTTTTGATCGAATTCTGAGGATATTGGCTTTTTTCCCCACCAAGGACCGACATGGATTCCCATCGCTCGGTTCCAGGCTAACACGGGATATCAGTTGTCTTTCTCCTAAAAGCTAAAGCTATTCTTTGATTTATTTATCGTGTGGAGCCCCTCCTACCTGAGTCGGGGATAGAGGCAGACATCGAGGTCAAGAGCATCCTCTCTTCAGACTCTGATACCTTCTACCAGCTGTAAAGCCAGCCCATCACACTGAGCCTGTCTTCACCCC…
CUST_20885_PI417904088	C179R155	COPT1	SLC31A1	COPT1 CTR1	High affinity copper uptake protein 1 (Copper transporter 1) (rCTR1) (Liver regeneration-related protein LRRGT00200) (Solute carrier family 31 member 1)	COPT1	-	NM_001173944.1,100,100.000,60,5.18e-26=XM_014136660.1,100,100.000,60,2.54e-24	XM_021602163.1,95,96.552,58,1.79e-19	High affinity copper uptake protein 1 (copt1)	ttggaagtcatcttgctgtggttattgtatttaagtgtgacgtgtgctgtcggcgttttgccagtagagtaaacgggaatCTGGACGTTCATTTGAAAGCTAATAGTTAATCATTCGGTTGTGAGTTATTAGGCCAAAGAAAATCACGCTGGAACCGAGTTCACTATATGTTGTGAGTACTACATTCGAGACGAACATGGACCACATGGACCACACGCACCATGATCACAGCAAAATGGCTGGCAGCATGGCTCCTCCCATGGTCACAGGCTCCCACGAAGATCATCTAGGTGGAGGAGGGGGCCATATGATGAAAATGACCTTCTACTTTGGCTACACAAACGTGGAGCTGCTGTTTGCCAGCCTTGTCATCAACACACCTGGAGAGATGGTGGCGGC…
CUST_1753_PI417904088	C248R062	ITPR1	-	-	-	LOC106565749	-	XM_014133229.1,100,100.000,60,2.54e-24	XM_021569789.1,98,98.305,59,2.97e-22	inositol 1,4,5-trisphosphate receptor type 1-like (LOC106565749), transcript variant X18	ggatgtAAAGGAGAATTACATATATTTTATTAGACAATTCTACATTATTTTACAATTCTAACAGTGCTTAAATCTTTTAAATTAGTCCTCTGCACATTCATTTTCAGTAACAGTGCTTTTAAATTCCACATTACTTTTCTGAAAACATAGGTCCCTATACAAAAAACAATGGCTTAAGCAACATAATGCATGTACATGTTTAAAGTACAACAATACAAATCAATAAATAATAATATATTAAATAAACAGCAGAATTGAGAACAGAAATCTGCGCTGAATGATAAAACAAAGGAAAAAGATAGTGGCTTTGTCACAAGTAGTAAATCAGAACCAAAAATGTCTTAAAGGGACAAATGGCACACATGACAGGTGTTATAATTACAAGAGGATAAACCTGGA…
CUST_9372_PI417904088	C222R126	CYB561A3	CYBASC3	CYB561A3	Cytochrome b ascorbate-dependent protein 3 (EC 1.-.-.-) (Cytochrome b561 family member A3)	LOC106580523	-	XM_014161689.1,98,100.000,59,9.14e-24	XM_021621984.1,100,98.333,60,8.25e-23	cytochrome b ascorbate-dependent protein 3-like (LOC106580523), transcript variant X3	gtgatcaaaggtttatttagtaataatagtcagcaaacatgaatacatacaaacatgaatacatacaaaattaagctacaCCACCATCACAATCCCACCCAAGGACCAAATTAAATAACAGATCCACGTACTTTGTGTAACATTTTGCACTTGTATAGCCTAGCCTACTGTATCTAAAATGTCTTGTAGTCTGCTATACACAAATGTGCTATTGCGCATTACGCATGACTATCAATTTAGTCTGATATTTGCTCTCTACACTGAATCCTTGATACTGCTGCCACCATGTGAAAAACATATAGCCCACGTTTTTTCCATCAAATTAATGTTTTAGGATTTTTATTTAACAAGGTAAGTTGACCGAGAACACATTCTCATTTACAGCAACAACCTGGGGAA…
CUST_12500_PI417904088	C220R061	FASN	-	-	-	FASN	-	XM_014179803.1,100,100.000,60,2.54e-24	XM_021576228.1,100,100.000,60,1.77e-24	fatty acid synthase-like (LOC106589612), transcript variant X4	cgactagttctcctatccccaaacctaaaccccattgggcaatacatataatggacgCAACCCCCAACCTATCAAAGCTTTTAGCTCGCTGCCACAGGGTATGTTCCCATGGGAACAAACAACGTGCTGTATGTTTGTGCTCTACCAATAAGGTCCTCGCTCTCTTTTATTTGTAATTTTTAAAAATCTTGTCTCTTTATCATGTTTGGAATGTTAGAATAAAGTTAGATGCTCAACTCTGTACTGGTAATCAATCCTGCTACAACTGGAGATGTTGCTGGCTCAACCCTATAGCTAGCCTAGCATGTGAGCCTGGCTGTGTTGCCAACTGATTGTAGCCTAGCCCTAGATAACCTACCTAGCTGTTGTGTTATGATACTGCTCAACCCACCAGTCTGC…
CUST_9463_PI417904088	C102R106	CYB5	CYB5A	CYB5	Cytochrome b5	LOC106590088	CYB5	XM_014180637.1,100,100.000,60,2.54e-24	XM_021563077.1,98,98.305,59,2.97e-22	cytochrome b5 (LOC106590088)	GGGGGAGCTTCCCGGTGCGTGCCAGGAATTACAATACAAATCTCTGAACTCACTTTGTCATCTAGGCTAAATGTCGTTACGTGTGTACTTGTACATAGTCACTGCATCGAAATATTTGTAAGATTGGAACATAATTCTTTCCTGGATTCACATTAGGTGTATTTATTTAAAATATAAATGGAGGATAAAGAGGAGAACGGACAAGCTGTAAAATACTACCGACTGTCAGAAATCGAGGAACAGAATACGTTCAAGAGTACATGGATTATAATCAATTTTAACGTCTACGATGTCACCAAATTTCTGGAAGAGCACCCAGGTGGAGAGGAGGTCTTGAGGGAACAGGCAGGCGGTGATGCCACAGAGAGCTTTGAAGATGTCGGGCACTCATCAGATGCC…
CUST_22304_PI417904088	C101R131	FCGR1A	OTOL1	OTOL1A	Otolin-1-A (zOtolin1)	LOC106612904	FCGR1	XM_014214561.1,97,100.000,58,3.29e-23	XM_021582338.1,97,96.552,58,4.96e-20	high affinity immunoglobulin gamma Fc receptor I-like (LOC106612904)	gcacgaggccaacagcttcacctgtgtccacgggggggtctacgtgttctcctaccacataaccgtacggaacaagccccTGCGCGCCGCCCTGGTAGTCAATGGGGTGAGGAAGGTGCGGACACGGGACTCTCTGTATGGCCAGGACATCGACCAGGCGTCCAGCCTGGTGCTGCTGCAGCTGGCGGTGGGGGACCAGGTATGGCTGGAGACACTGAGGGACTGGAACGGTGTCTACGCCAGTAGTGAGGACGACAGCACCTTCTCTGGCTTTCTGCTCTACGCTGACAAGCCCTGACAAACGCTCTGATATCTAATACAATCTACACTGTAACTCTACTGTACCTCCACAGTACCTAAACAATCTCTACTGGCACTCCTCCATACCACCCATACTGT…
CUST_24110_PI417904088	C119R039	DHCR7	DHCR7	-	7-dehydrocholesterol reductase (7-DHC reductase) (EC 1.3.1.21) (Sterol Delta(7)-reductase)	LOC106587139	-	XM_014175186.1,100,100.000,60,2.54e-24	XM_021607019.1,100,98.333,60,8.25e-23	7-dehydrocholesterol reductase-like (LOC106587139), transcript variant X2	GTATTCACCATGTTAGGTTTATTTACTTTTCTAAGTTATCACTTGAGGTAAGGCAGATGAGGTTAAAAAAAAAAAAAAGGCAAACAACTGAAATCAAAAGACTGTTGGCTAAAGTAAAAGCACTATTAGCACAACACTTTAAAATAACAGGTACGGGGTACCTCAAACATATTGACAGGCATAAAGAAAAATGAATTTTAGCAGGAACAATCATTTTATAGGTGTAGCTGCTTCTTGAACATAATATACGAGTCTGCTGCTAGCATTTCATGTAATGCTGGGCTGACCCCTAAGTAGAAGAAACATTTGTCAACGACAGTGCATTGTCAAAAGATATCTAGATTATTGCTCACTTGTAGCTGTAATTACTTTACCATCGGCAACTAAGTGCTACTGCAT…
CUST_27295_PI417904088	C023R019	CD276	CD276	B7H3	CD276 antigen (4Ig-B7-H3) (B7 homolog 3) (B7-H3) (Costimulatory molecule) (CD antigen CD276)	LOC106562141	-	XM_014126787.1,100,100.000,60,2.54e-24	XM_021586063.1,100,100.000,60,1.77e-24	CD276 antigen-like (LOC106562141), transcript variant X2	AGCACCGTATGGGAGTGGTTTCTTAGAATCGAATGAATCCTCCTGAATGTAAGGTTTTTCAATTCCTGTAGCCGAACTATTACTTTGTCAAGTCAAAAGGGTTCAAGGGAACACTATTAGCGCTTATTTTGGCAGGAAATCCCAAAGAGGGTATAAAAAACTCAATCGAATAACATCATATGCGATTTTGTGTAACAAATCACTGACGCTGGATGGTTGGTGATTCATAAGTTGCGTTCCCCAAACATGTGCTGTGTCTGACGAGGCTGACCCGTGCTGCCGAGACCCTCAGGAAGACCATGCTGTCCCTCCTGCTGCCCATGCTGCTTGCTGTGCAAGCTCTCGCTGTCCTAGAAGTGCAAGTCCCAGAGCTGCCAGTGGTTGCGCTGTACGGCATGG…
CUST_8237_PI417904088	C170R042	RAB8A	RAB8A	MEL RAB8	Ras-related protein Rab-8A (Oncogene c-mel)	RAB8A	-	NM_001173613.1,100,100.000,60,5.18e-26=XM_014206211.1,57,97.059,34,3.36e-08	XM_021614080.1,100,98.333,60,8.25e-23	RAB8A, member RAS oncogene family (rab8a)	ttgggcaatatcaagtatggcgaagacatacgattatttgtttaagttaCTGCTTATCGGAGACTCCGGTGTCGGGAAGACCTGCGTGCTGTTCAGGTTCTCAGAGGATGCTTTTAACTCCACATTCATCTCCACCATAGGCATTGACTTTAAGATTAGAACGATAGAACTAGACAACAAGAAGATAAAGTTACAGATATGGGACACAGCAGGGCAGGAGCGATTTCGAACAATCACAACAGCGTACTACAGAGGAGCGATGGGTATCATGCTAGTCTATGACATCACCAACGAGAAGTCCTTCGAAAACATAAAGAACTGGATACGGAATATAGAGGAGCATGCATCGGCTGATGTTGAAAAGATGGTCCTCGGTAACAAATGTGACATCAATGACAA…
7_4_15_4	C177R096	DDT	DDT-A	-	D-dopachrome decarboxylase-A (EC 4.1.1.84) (D-dopachrome tautomerase-A)	LOC106570496	DOPD	XM_014142903.1,100,100.000,60,2.54e-24	XM_021601787.1,100,98.333,60,8.25e-23	D-dopachrome decarboxylase-A-like (LOC106570496)	ATCAATTTGATGTTATTTTAATGGACAAAAAAAAGTGCTTTTCTTTCAAAAACAAGGAGATTTCTAAGTGACGGTTGTGTATGTTAGTCATTATGATTCTTACTACCAAAACAGCAACAACAAAAAAATCTATAACCGCATTATCCAATGTTCTTGTGATATGAAATGAATAGTTGAAATGACATAGTAATAACATTGAATACAAGTCAATTGACTTACATTTCCTCTAATCAGGGTATTTTATCATCTAGCTTGTCAAATGTGTGGTTCTGTTTACTATGGCAGACATGTACAGTAATATAGATTAATGAGTCCTGGTTCCAGGACATAGTTTCATGGGGACAAATTCCATAATCCTAAAATGCTATGCAAGTCTTATTGACGACATGTGGCACTCAT…
10_3_12_8	C017R065	FARP1	FARP1	-	FERM, ARHGEF and pleckstrin domain-containing protein 1 (FERM, RhoGEF and pleckstrin domain-containing protein 1)	FARP1	-	XM_014173363.1,100,100.000,60,2.54e-24	XM_021597257.1,100,100.000,60,1.77e-24	FERM, RhoGEF and pleckstrin domain-containing protein 1-like (LOC106586263), transcript variant X6	ccagctccatggaagtatgatcaagatggagaacttccagaagctgctggagcttatgaaggatttgattggcatcgacaATCTAGTCACTCCAGGGAGGGAGTTCCTCAGGTTAGGCTGTCTCAGCAAGCTGTCTGGAAAAGGTCTCCAGCAACGAATGTTTTTCCTGTTCAATGATGTTCTGTTGTATACGAGTCGAGGGATGACAGCAACGAACCAGTTCAAAGTGCACGGGCAGCTCCCTCTCTATGGCATGACAATCCGGGAGAGCGAGGATGAGTGGGGTGTGCCTCACGCCTTCACCCTGGTTGGGCAGCGCCAGTCAGTAGTGGTAGCAGCAAGTTCCCTGTCAGAGATGGAGAAGTGGATGGAGGACATTAATATGGCCATTGTCCTGGC…
CUST_16898_PI417904088	C101R063	KYNU	KYNU	-	Kynureninase (EC 3.7.1.3) (L-kynurenine hydrolase)	KYNU	-	XR_001321707.1,100,100.000,60,2.54e-24	XR_002469490.1,100,100.000,60,1.77e-24	kynureninase-like (LOC106575231), transcript variant X3	GAAGTAGGTCTACATAGTGCCTCTTATTCGACCATTTTGGATACAGGTGTTGTTTACAGTATCGATAATACCTCGCCAGTGAGTTTATCTCTGAGGTCAATTATTAGCTAACTGCGGGAATTTACAGAGGGGTGAAAGAGCACTCGTGAATGTGTCCGATTAACTCTCAAACTGGTGAAAGAGACTGTGATATATTCAACTGAAATTGGAAATACTTGCATTATCTGTAATGGACCCATTTGACGCCATGTCTCCGCGCAAGGTTCTGGAGCGCGTCTCTACTCTGCTGGGATGCAGCCAGACATCGAATGAAGTAGCCACATATCTGGACAATCACGACGAACTAAAGCATCTACGTGAACAGTTTCTATTACCCAAAGTTGCAGAACTCCCTCCTTC…
CUST_5634_PI417904088	C186R106	MVK	MVK	-	Mevalonate kinase (MK) (EC 2.7.1.36)	MVK	-	XM_014160777.1,100,100.000,60,2.54e-24	-	mevalonate kinase (mvk), transcript variant X3	AATGATGCACATTTTATTTTCAGTTTTAAAAGGTTTGTATACCTAGGAATGCATCTGCTTTGGCATTGTATTGACACCTGAAGCAAAAACTGAATGACAATCTCTTCGCTACGATTTGCTCAATGTCAGTTACGAGAGGTTAGTTAATTCTTACATTTTGCTGCCATCTATATGACAAATGGCTCACAGCACCCTCATTTAAAACGAAGAACAAGAACAAGTCAACCAAGGTATTGATATTCAAAAACAAGGGTAAACTGCAAACGGGAAAAAAATATAATAATCAGGTGAACAACTGAGTTTGATGCAAATATTAAAAAGAAAACCAAATATACACTAGAGTCAAGGTCGCCTGTCTTTTTTTCAATACATTTTTTACTCGTTTTTAAATACTAGCTG…
CUST_35733_PI417904088	C023R135	FAM172A	-	-	-	-	-	-	-	0	GGGGGCAATATTCTCCTACACCTAGATGATATATGTGTTTAGATGTTGGAAGAAATGTAACACGTTTATTTTCCAAAACACTTTCCTCACGTGCAAACGGAAAAGTGACAAAGAAATCAGCACTGGCTCAGCCTTGCGTAATCTCAGTCAGCTGGGACATAAACAAGATTAAAAATACAGTGTATTTCCACGACGTTTTGGTGAGTTATAAATCACTCAAAGCTTAATAGAATAGCCTTCTAATATGCCCATATATTAGTCTAAACAAGACAAAACTCCTGTGATACACCTCCCGACACACCCACTGTCTATCCAGACATATGCTTTACCTTTTCACGGCTTCATGTGTTGAGGTATTTATGAGGGGACGATAAGAAATGTATTGGTATACATTTCACC…
CUST_5296_PI417904088	C185R007	NAMPT	NAMPT	PBEF1	Nicotinamide phosphoribosyltransferase (NAmPRTase) (Nampt) (EC 2.4.2.12) (Pre-B-cell colony-enhancing factor 1 homolog) (PBEF) (Visfatin)	LOC106565851	-	XM_014133445.1,100,100.000,60,2.54e-24	XM_021569603.1,100,96.667,60,3.84e-21	nicotinamide phosphoribosyltransferase-like (LOC106565851)	taaagattttggaggagtgcttcggttgctctctaaactctcaaggcttcaaggtgctgccatcttacctgcgtatcatcCAGGGCGACGGCATTGATCTCAACTCAGTGGATGAGATCCTGGAGAAGTTGAGTGACGAAGGCTGGAGTGCTGAGAATGTGTTCTTTGGCTGTGGGAGCGCCCTCCTTCAGAAGCTCAACAGAGACACACTCAACTGTGCCTTCAAATGCAGCTATGTGGAAACCAATGGGAAGGGGATGGATGTGTACAAGCAGCCTGTGACCGACCCGTCCAAGGGGTCAAAGAGAGGTCTTCTGTCGCTTAGGAGAAACTCTGATGGCTTCATTGAAACTGTGGAGCGAGGGGTGGGCAAGCCAGAGGAGGACATGCTGGTGATTG…
CUST_2871_PI417904088	C024R063	GRAA	GZMA	CTLA3 HFSP	Granzyme A (EC 3.4.21.78) (CTL tryptase) (Cytotoxic T-lymphocyte proteinase 1) (Fragmentin-1) (Granzyme-1) (Hanukkah factor) (H factor) (HF)	GRAA	-	NM_001141037.1,100,100.000,60,5.18e-26=XM_014143478.1,100,100.000,60,2.54e-24	XM_021622235.1,100,96.667,60,3.84e-21	Granzyme A (graa)	ACTATCGCATGTGATTTATTTACAACTAGTACAAGACTTGACATGTCAGGTTGAACATATAACAACTAAAAGGAGAGTAAAACACCTGAAATGTCTGTTTGTTTTCACATTTTAATTTTAGAGAGCAAAGATTGTCAAGAGTTCAAACATACTTCACAGCTTCCAGCACATGAGCTATAATTCAAATTCAGTAAACATTAAATAATTTCACAATTATTGAGAAAAGCCTGAGAAAGCAGGTGTCAATCAGTCAATCAATGACTTCCGCATGGTTTTGTTGATCCAGTCAAGGTACATTCTTGATATGAGTGTGTACACTCCAGGTTTGGTCTTGATGCCACATTTTATACCGAAGGACACGACTCCCCTTAGCTCACCTCCACACACCAACGGGCCACC…
CUST_11506_PI417904088	C159R064	RXRG	RXRGB	NR3B3B	Retinoic acid receptor RXR-gamma-B (Nuclear receptor subfamily 2 group B member 3-B) (Retinoid X receptor gamma-B)	LOC106560629	-	XM_014123686.1,100,100.000,60,2.54e-24	XM_021604803.1,100,96.667,60,3.84e-21	retinoic acid receptor RXR-gamma-B-like (LOC106560629)	cCAAATTGTATATTATTTT*ATTCTGGAAG*AATTCTAAAATTCATTTTTTTTAGAAACTTAAGGACGGTTTTCAGTTTTATACAAGTAATCTTTTAATAAAATATTCTTTTCAATATTGCTTTGGGTTGCTTTTAAAATGGATACCTGAAATTATCTATTTACAAAATTTTATTAGAATTGTGTTTTAACAGTGTATTTTTTTTACACCCCACTCCACTCCCTTAAACTAGATGTTCCTCGTACCCCCCAAAAATACAAATTGTTGACATTAATAATAATTTGTTTCTTTGTACAAAATACATCTGTTTTACAACTTGAATCAAGTTTCATCTTTATATCAATTACATTGTGGGAGTATATACAGAGGGAAGTGGGACTCGTGTCATGTGATTTGGTG…
CUST_3041_PI417904088	C189R140	GSTT1	GSTT1	-	Glutathione S-transferase theta-1 (EC 2.5.1.18) (GST class-theta) (GST-CL1)	GSTT1	LOC106585460	XM_014171685.1,100,100.000,60,2.54e-24	XM_021605686.1,100,100.000,60,1.77e-24	glutathione S-transferase theta-1-like (LOC106585460)	tgcaagacatctttctttaatatttttattaactaagaacattttctataaatgtcactttgttaatgtgaagcaagttgggtagataagcagggaaaaaatccactaaaatcatttttttccccttttttagatctacatcattttattaaggcagcaaaaggtgaaaactgtgcaagggatgtgtagactttcactaggcactgtaaatgaaatgggaagagtttgaagaatgttctttcaggttttggacttttgcatatctcataaaatagtactttacattctattgttaattgggcattttctttttagaactaaacctttttggaaaaatgggaagagtttaaagaattttctttcaggttttggactgcagaacctttgcatctctcacca…
CUST_6825_PI417904088	C108R013	SNTB1	SNTB1	SNT2B1	Beta-1-syntrophin (59 kDa dystrophin-associated protein A1 basic component 1) (DAPA1B) (BSYN2) (Syntrophin-2) (Tax interaction protein 43) (TIP-43)	SNTB1	SNTB1	XM_014187123.1,100,100.000,60,2.54e-24	XM_021586918.1,100,96.667,60,3.84e-21	beta-1-syntrophin (LOC100380850)	TCTTTTTTTTTTTTTTTTTTCCAGAAATATGTCATTTATGTGCATCATTAACAGAGTTAAAATAAAACTAATCCTTGAATTATAATAGCTGCCAAAGGCATAGGACAATTCAAATTTTCAAGCAGCCTTTACTAGCTTTTTCACCGTAACTTTTTAATATAAGTTAACAGTAATCGCTGAATTATTTGCAGACAGAGATTGCCGAATAAACAATTAGCGTAGGATGGATGGATGCTAGATAGATAATACTTCCAGTATGTTTTTAGTACCAAAACAATAGATTATTGTTCTTCTACAGCTTAACGATTTGAACAAAACAATTTCTTCTGCTGTAACTGATCTTTTACGCTCTCACTATGATGTCATCGGTAATGCATGTGTTTCTATAAATATACAAAT…
CUST_36991_PI417904088	C035R044	CYB561A3	CYBASC3	CYB561A3	Cytochrome b ascorbate-dependent protein 3 (EC 1.-.-.-) (Cytochrome b561 family member A3)	LOC106580523	-	XM_014161689.1,95,96.491,57,2.56e-19	XM_021621984.1,100,100.000,60,1.77e-24	cytochrome b ascorbate-dependent protein 3-like (LOC106580523), transcript variant X3	gtgatcaaaggtttatttagtaataatagtcagcaaacatgaatacatacaaacatgaatacatacaaaattaagctacaCCACCATCACAATCCCACCCAAGGACCAAATTAAATAACAGATCCACGTACTTTGTGTAACATTTTGCACTTGTATAGCCTAGCCTACTGTATCTAAAATGTCTTGTAGTCTGCTATACACAAATGTGCTATTGCGCATTACGCATGACTATCAATTTAGTCTGATATTTGCTCTCTACACTGAATCCTTGATACTGCTGCCACCATGTGAAAAACATATAGCCCACGTTTTTTCCATCAAATTAATGTTTTAGGATTTTTATTTAACAAGGTAAGTTGACCGAGAACACATTCTCATTTACAGCAACAACCTGGGGAA…
CUST_23792_PI417904088	C014R142	TRIM35	-	-	Zinc-binding protein A33	LOC106595751	-	XM_014187130.1,100,100.000,60,2.54e-24	-	zinc-binding protein A33-like (LOC106595751)	ggggagagtgtgcctgaggacccacagttgggctcaagagcactgatcaacttggccaaacacctgggcaacctcagtttCCAGGTCTGGGAGAAGATGCAGAAGGCAGTGAAATACACACCTGTGGTTCTAGACCCAAACACTGCACATCCCAGTTTCTATCTATCTGAAGATCTTACCAGCCTAAGATGTGAAGATAAACTACAGAGTCTCCCCGACAACCCAGAGAGGTTTGATATATATCGTGACATCTTGGGTTCAGAGGGGTTCACTTCAGGGACACACTTCTGGGATGTGGAGGTCGGAGAAAGTGATGACTGGAGGGTAGGAGTGGCCAGCGAGTCTGTTAGTAGGAAACCGGAGACAGATAAAGAAAGTGGATTATGGGCTGTTGGGGCA…
CUST_2987_PI417904088	C032R141	ARHGEF5	-	-	-	LOC106576827	-	XM_014154271.1,100,100.000,60,2.54e-24	-	rho guanine nucleotide exchange factor 5-like (LOC106576827)	GGGGTGTTGCAGCCGGCCGCGACCCGGGAGACCCAAGAGACAGCATACAATTGGCCCAGCGTCGTCCGGGTTAGGGGAGGGTTTGGCCGGCCGGGATGTCCTTGTCCCATCATGCTCTAGTGACTCCTGCACGCTGCCTTCGTTTGCCAATTGTACGGTGTTTCCTCCACATTGGCTGGCTTCTGGGTTAAGCAAGCAGTTTCGGAAGACGCCTGGCTCTCGACCTTCGCCTCTCCCGAGACCGTACTGGAGTTGAAGCAATGAGACAACACTGTAACTACCAATTGGATATCACGAAAAAGGGGTAAAAAGGTAAAAAAATATATTAAAAAATGACATGGTGTGATACACCATGGCAGTGTTTCGCAATAGAGGTTATTGTCTTTGAACAAAATGTTT…
CUST_18637_PI417904088	C168R035	ALPK1	ALPK1	KIAA1527	Alpha-protein kinase 1 (EC 2.7.11.1)	ALPK1	-	XM_014155645.1,100,100.000,60,2.54e-24	XM_021615290.1,100,100.000,60,1.77e-24	alpha-kinase 1 (alpk1), transcript variant X2	ggggagtagttatgtggggaaggagtacctagaacctaagggcattcagttccatctgagtgacgtggagaggcagatgaCGGCCCAGTACTACGTGACAGAGTTTAACAAGAGACCCTACAAGGAGAAAGTGACCGCTCAGATCTTCTTCATCCCTTCAGAAGTGCTACTGATCTTGGAGGGGGATGAGGTGGTGGACTGTGTGACAGTGGAGCCCTACATGCTGGGGGACTTTGTGAAGCTCACCAACAACACTACTAAAGTGGACAAGCGGTTCAAGGCATCAGAATATGGAATCGCTTTCGGACATTTCACCTACCAGTTCTCTGGATGCCAAGAGGTTGTTGTCGACCTACAAGGGTGGGTGACCGCCAATGGGAAGGGGCCGACGTACCTCAC…
CUST_38207_PI417904088	C257R107	MAGT1	MAGT1	-	Magnesium transporter protein 1 (MagT1) (Dolichyl-diphosphooligosaccharide--protein glycosyltransferase subunit MAGT1) (Oligosaccharyl transferase subunit MAGT1)	MAGT1	-	XM_014183347.1,77,95.652,46,3.33e-13	XM_021583210.1,100,100.000,60,1.77e-24	magnesium transporter protein 1-like (LOC106592046)	AGCATCTCTCTCCATTTAATACAGGTGGTTAACGTAAACAACCCTCATCAAATACTAAAAACAAGCATTACAATAAGGAGATGCCCCACCCCAATCAGAAAAAAACGGAAGTAGGATGTCTCGCTTTCTTTACAGTCTCTGCCCCTATCACGCCATTGGCTCTTGAGGCGGAAAATCGACCAATCGGAATGTTACAGAGAATCCTTCAATCCGAGACCCTGCTCTCTGAGAAGGTGGGTCAGCTTATGGACTGGACAGGGAAGAGAGCTGTGATCCGTATGAACGGGGAGAAGTTTCGTCGCTTTGTGAAGGCTCCTCCCAGGAACTACTCTGTGGTCATCATGTTCACCGCCCTGCAGCCACAGAGACAGTGTGGCGTCTGCAAACAGGCTGACGAGG…
CUST_22372_PI417904088	C153R056	PERP	PERP	KCP1 KRTCAP1 PIGPC1 THW	p53 apoptosis effector related to PMP-22 (Keratinocyte-associated protein 1) (KCP-1) (P53-induced protein PIGPC1) (Transmembrane protein THW)	PERP	-	XM_014179942.1,100,100.000,60,2.54e-24	XM_021576328.1,100,95.000,60,6.42e-19	PERP, TP53 apoptosis effector (perp)	ttgggctggttgtgTTGACTCTCGCCCTTCGTACATGACCAGTTTTACAGGTTTATTAAACAGGTTCACTGTGCACTGATTACATTGCAAACTCGGGTGTGGCTTTTATATTTGATCAGTAAAGAAGGTGTACACAGACCCAGACGTTATCTGGACGCTCGACCGCTTCAATCCACACTGTCTTTTCTGTTTGTCGAATATGTTTCGCTGTGGAATTGCGTATCCAAGATGCAGGTGGATCGTACCACTTCTTTTGCTTTTTGCGATTATATTTGATATTATTGCCATTGCTGCTAACTCGGGATGGGTTGAGGACGAGGGTGCAAAGTCCCACTACGCAAGTATGTGGACCCAGTGTCGTGGGCGTAATGACAACTGGGACTGCAAATCTCTCATGGA…
CUST_41475_PI417904088	C115R123	TPSNR	TAPBPL	-	Tapasin-related protein (TAPASIN-R) (TAP-binding protein-like) (TAP-binding protein-related protein) (TAPBP-R) (Tapasin-like)	TPSNR	-	NM_001140511.1,100,90.000,60,2.44e-14=XM_014153192.1,100,90.000,60,1.20e-12	NM_001124554.1,100,100.000,60,1.55e-26=XM_021581537.1,100,100.000,60,1.77e-24	Tapasin-related protein (tpsnr)	aaattctgcaatgaCGGACCTGCTTCCAACGCTGAAAACAACTTAGAACGCTATAGGAAACATGGCATCTATTAATCAATAGGTCTGATCATTCTTATTATGTCAAACTAATGACGTTCTACGTGAACATTTAATTAACCATTTTTAACTTTATTTATTTGATTTACCTCCAAACAAAAGTGAAAGTAACTTCACTGTATAACAGCCTAACATTTTAACTGTCTCTAAATTGGTTTCGAGCGTGGTCATTAATTACATTCTGAAATTAGGGGTCTATTCTGTATATTTATGAAAGGTCAGTAATTACTGTTGAATAAAAAACTACTGGAAAGATGCTTGAAATCCTGCTTTTTGGATATTTGATTACATGCGTTTCTGGCCAGGGAGGAGCAGATGTGG…
CUST_20619_PI417904088	C114R007	STARD7	-	-	-	LOC106563200	-	XM_014128541.1,100,100.000,60,2.54e-24	-	stAR-related lipid transfer protein 7, mitochondrial-like (LOC106563200)	ATACTTCAAATTGGTTTATTGAATCATTAGTTGCTCAATTTCAACATGGAATCATACAATGACAACTTCTTGCCAGGTTCCATATATTTTCCCAATTCTTTTCAATCAATATAATTTACACAATTTCTAAAGGAATCAACTTCTGGAAATCATATCCAAGGTGTTAAACTGCATGTTGAAAAAAATAAACAGTATATTGAACACACAATTGTAGTCTAGAAAAGGATAGCACACCAAAACGTTACAATCGCCAGATTTACATTCTCAAACATTGCATACAGTAGTTCAATATAGAAACCAAAGTTTTATGCTCTGCATACACATAGCTCTGACCATCACTAAACAAAAGCTCAACTAGAGGTAATTCATTTCCTCTCACATGTACAATATATCAAAACA…
CUST_21173_PI417904088	C048R097	TMEM50A	TMEM50A	SMP1	Transmembrane protein 50A (Small membrane protein 1)	LOC106610895	TM50A	XM_014210562.1,100,98.333,60,1.18e-22	XM_021584651.1,100,98.333,60,8.25e-23	transmembrane protein 50A-like (LOC106610895), transcript variant X3	gtggggaccgagcaggcgcgtgtctcagctctctcagaagcAAAGCATAGGCTAATAAACGGCGTCTAGGGGTTCCATAACGAACCCCAAAAAGAAAAGCTCAGAACCATGTCAGGGTTTTTGGACAGCGTCCGGTGCGGAGACTGCGAGTGCAATGTGGACTGGGGAGAGAGGCGAAACACTATGGCATCTATAGCTGCTGGAGTCCTGTTTTTCACTGGTTGGTGGATAATCATTGATGCAGCTGTGAAATATCCAGATGAGGCAGTCTTCCATCATGCCTATCACACCTGTGGAGTCATCGCTACTGTGGCTTTTCTCATGATCAATGCTGTCTCGAATGGCCAGGTGAGAGGGGACAGCTACAGTGAAGGTTGCATTGGGCAGACAGGAGCTCGT…
11_1_10_10	C115R011	COX6A	-	-	Cytochrome c oxidase subunit 6A, mitochondrial (Cytochrome c oxidase polypeptide VIa)	LOC106579942	CX6A1	XM_014160366.1,100,100.000,60,2.54e-24	XM_021621303.1,100,98.333,60,8.25e-23	cytochrome c oxidase subunit 6A, mitochondrial (LOC106579942)	GGGGGAGAAGAGCACGTTTCCCTCTACATCACTTCCGTTCATCTGATCAGTCAGAAAGACTGCGAAAATGGTGTCTTTTGGAAGAATTTCGCAAGCTCTCCTACGGTCCTCAATGATCCAGACCCGTCAACTCTCTGCCTCAGCGGCCCATAGTCATGGGGAGCAAACAGCCAGAACATGGAAGATCCTCTCCTTTGTAGTTGCCCTTCCGGGGGTTGCAGTGTGTATGTTGAACATGTACCTGAAGATGCAGCAACATGCTGCACACCATGTGGAACCTGAGTTCGTACCTTACAGCCACCTTCGCATTCGCAGCAAGCGTTTCCCATGGGGTGATGGCAACAAGAGCCTGTTCCACAACCCTGAAGTCAATGCCCTCCCTGATGGCTATGAAGGACG…
CUST_36264_PI417904088	C227R129	-	PSUG	-	Pseudouridine-5'-phosphate glycosidase (PsiMP glycosidase) (EC 4.2.1.70)	LOC106561644	-	XM_014125797.1,100,96.667,60,5.50e-21	XM_021577259.1,100,100.000,60,1.77e-24	pseudouridine-metabolizing bifunctional protein C1861.05-like (LOC106561644), transcript variant X3	TACGGTCCGGAATCCCGGGTCACCCACGCGTCCGGAGTTCTCACACACTGGAGAAGTGACTTGGTTGGCTACTCACTGCTGCTTTTGATGCCTGGGAATCCAAGGCTGAGAAATCTGTTTTGTTTTCCATCATGAAATTAAGATATTCTGAGTTGAGGTTGCTGAAGGAAGTATCTGCACAACTCCTAAAACGTGGCATCACAACATTTCACAGGAGATTATGCAAAAATGATGGTCTCTTCCTTGTCCACCCGGCAGTATCCCAGGCATTGGCAGAAAACAGAGCAGTGGTGGCACTAGAGAGCACCATCATCACCCATGGCATGCCATACCCACACAACCTGAGCACAGCCAAAGCGGTAGAAGCCATAGTAAGGACAGAGGGAGCCATTCCTGCCA…
9_2_8_2	C250R007	PSAPL1	USP39	-	U4/U6.U5 tri-snRNP-associated protein 2 (Inactive ubiquitin-specific peptidase 39) (SAD1 homolog) (U4/U6.U5 tri-snRNP-associated 65 kDa protein) (65K)	LOC106585263	-	XM_014171295.1,100,100.000,60,2.54e-24	XM_021606086.1,100,96.667,60,3.84e-21	proactivator polypeptide-like (LOC106585263)	ggggggaaacctggagttttggaggtgtgcaatcagtaaaatcaacgcaaccctggatttagttatattattatcagctcTGTTTTTTCATATATTAACACGATGGTCTCTGTAAAACGGGAGAGAGAACTTGACTTGGAAGACGATGAAGCTACAGTGCCTGTGAAAGTAGGCCGTTCATCCGAGGATCGCAGAAGTCGCCACTGTCCCTACCTTGACACAATCAATAGGAGTGTGCTGGACTTTGATTTTGAGAAGCTGTGCTCCATCTCGCTCTCCCACATCAACGTCTATGCTTGTCTCATCTGTGGGAAATACTTCCAAGGTAGAGGTTTGAAGTCCCATGCCTATACTCACAGTGTGCAGTTCACCCACCATGTGTTCCTCAATCTGCACACA…
CUST_40779_PI417904088	C015R136	RGN	RGN	-	Regucalcin (RC) (Gluconolactonase) (GNL) (EC 3.1.1.17) (Senescence marker protein 30) (SMP-30) (xSMP-30)	RGN	-	NM_001141394.1,100,98.333,60,2.41e-24=XM_014151102.1,100,98.333,60,1.18e-22	NM_001246349.1,100,98.333,60,7.21e-25=XM_021596775.1,100,98.333,60,8.25e-23	regucalcin (rgn)	atggtccaaatttacgacgctttttttttttttgctgacggcatacgttttcagttgagaaagaggtacggctggggagcGGGACTACCCCTGTCACATGGTCTGTTTATTTGTCAATGACTGTCTGTCTGTAAACGGCGAGACACTTGCTGTCAGGCGATTCAGAAGCTCTTCAGGCGACTTCGACGTATAAAACAGTCATGTCTGTGAAGGTGGAGTGTGTAGTGAAAGAGAGGTGTGAGATCGGAGAAGGGCCGGTGTGGGAGGAGAAAGAAGGAACTCTGCTCTTTGTGGACATATCAGGACAGAAGATCCACCGCTGGAACCCAGCAACCAATCAGAAAGAGACAGTGGCCACAGAGAAGTTTGTGGGCTGTGCGGTCCCCCGGCGGTCTGGAG…
CUST_5312_PI417904088	C207R051	PXMP2	PXMP2	-	Peroxisomal membrane protein 2	PXMP2	-	XM_014161177.1,100,100.000,60,2.54e-24	XR_002475366.1,100,98.333,60,8.25e-23	peroxisomal membrane protein 2, 22kDa (pxmp2)	ggggatacatcatatgtccaaacatatctgtcatagggctGGACACATCTGTGCGGTGGTGGTCCTTCAAACACAAAACGTATCGTCTAAATGCAACATTTCTACCGTGACAATGCCTGTACAAAGTTTACCGATTCGAGACTCTGCCTTCCATGTGCGACTGCTGCATCAATACTTGATTCTGCTGAAGAAATACCCAATTCTTACCAAATCCGTGACGAGTGGCATTCTCTCAGCAATGGGAAATCTTCTATCTCAAGCATTGGAAGCAAAACGAAAGGCCAAAGAAGGGATCCCAGTGAAGGAGATTGACATTTCAGGACCTGCCCGCTTTGCCATTTATGGGTTGCTCATTACTGGGCCTGTAAGCCATTACTTTTACCAACTTATGGAGGTGTT…
CUST_16792_PI417904088	C098R132	PLBL1	PLBD1	-	Phospholipase B-like 1 (EC 3.1.1.-) (LAMA-like protein 1) (Lamina ancestor homolog 1) (Phospholipase B domain-containing protein 1) [Cleaved into: Phospholipase B-like 1 chain A; Phospholipase B-like 1 chain B; Phospholipase B-like 1 chain C]	PLBL1	-	NM_001140079.1,100,98.333,60,2.41e-24=XR_001327985.1,100,95.000,60,2.56e-19	XM_021558019.1,100,98.333,60,8.25e-23	phospholipase B-like 1 (plbl1)	ATGGGAATTGTTGAAATTTATTAACAATGATCATAGAAAATACATTTCTGAAGTGCAGCTTTCCAAGACATCAAACAAGTACAAAGTTCAAAGATATTCTTCCATGTATAAAAATAGAAACACACACCGTAGCAGCAGGCCATGCAACAAACATGAGATTAAGAGCCCTGAGAATTGCATTGATATTATCATATAGTGAATTCAACATATGACAACATGATTGTAATTAGTTTCAAGGTCAGGATTTGATTATAACAGAAAGGGTACTGAATTTTAATCTAGGTTTAGGTCATTGACCTGAATTTAAAAAAAATTGTATTTGGCACCGAACAAGCCAGGCTTCAATCATTTTCTACATTGATTCAGCATCTTTCAAAATATGTCTAAATGACAGCAGTA…
CUST_22641_PI417904088	C191R130	OR52B2	-	-	-	LOC106577637	-	XM_014155935.1,98,100.000,59,9.14e-24	XM_021615047.1,98,96.610,59,1.38e-20	olfactory receptor 52B2-like (LOC106577637)	gctgttcacagtttcaactCTTTTATTACAAAGAATCTGCCACT*GAGGTTCACATGGCGATGAAAATGGGCAATAATGTTCAATCTGGCTCTTATTTGAATGAATCGGGATCTTTACATCTCAAATAAAAGATATTGTCTTGACTTTCTCACACAAAAAAGAAGACATTGCTGATTCAATTATCATTAATGAATCAACTCTTTCATAGTAGGCTATATTGCACAATGCACATGCAGTCAATTCTGGTGGTCAGGTGGTCTTGTACTGTCAAATGAGTCAAATTCCTGCTTGACTCCTCTCTGACACTGTACAGTTAACACACTACAGGTGGTCTGAGGCTGGTCTGTCCATAGTGATGCCCAAGCCTATAACTACACCCTGGGTAGAACAGAAGCACT…
CUST_4331_PI417904088	C173R065	PEMT	PEMT	PEMT2	Phosphatidylethanolamine N-methyltransferase (PEAMT) (PEMT) (EC 2.1.1.17) (EC 2.1.1.71) (Phospholipid methyltransferase) (PLMT)	PEMT	-	NM_001141302.1,100,100.000,60,5.18e-26=XM_014158251.1,100,100.000,60,2.54e-24	XM_021564920.1,100,100.000,60,1.77e-24	phosphatidylethanolamine N-methyltransferase (pemt)	ggggagaaaacaccgcgctgtcggcttcagtAGGTTAGAGTTGACTGTCGTATTTGTTCTACTACTAATCTTGGTTAAGATGTTGTCATACATTTGGGTCAATTATTCTGAAATGCGTTGCTATCAGCACATATAAAGCATTCACGTTCTCAGTCAGTCGTTCTTTCTACCGTGGTGTGTGTGTATGAGCGGCGTTGCCGACAAGAGAAATCCCGTGCTGGATTGTTGCGGAGGGCTGAATAACGTGGATTACAAAAAGGTGGACATGTCAGTAATGGAGGATGTTCTGAAGTACATAGACGTCTATGACCCCAGGTTCTGTGTTGCTGTCATCGCCATCATCTTCAACCCTTTCTTCTGGAATGTGGTGGCACGTTGGGAGCATCGTACGAGAGGTCT…
CUST_20348_PI417904088	C098R057	VANGL2	-	-	-	LOC106577852	-	XM_014156245.1,100,100.000,60,2.54e-24	-	vang-like protein 2 (LOC106577852)	CAAGAGAGATCATTTATTAAAAAGGCTGTAACAATTTTGTCCTAAAATTATCCAATATTAAAAAATTTTTTCAACTTCAAAATGTCTTTACATCACATTGGTCTTAAAAAAAAGGTTAGGGACTTCACTTCGACATGAAATGAAACAAAAAAATTGCAGCAAAAATATAACTTTACAAAACGTCATGTAACTACATGCATCAGGGTTCATAATAAAATGAAGGTCTAATAAACATACGGTACACAACATAGGAGACTACTGTAGCTGTTAGCCGCCAAAAAGGACAAGAACCATTGTGTGTGCAGGACCTATTAGGACTGTTACTGATATTCACCTCAGCCTATGAATCGAACAAATCATCAAGCACAATGTTTCCATATTAGTCACATCTTAGTCACA…
CUST_11093_PI417904088	C213R017	VATH	ATP6V1H	-	V-type proton ATPase subunit H (V-ATPase subunit H) (V-ATPase 50/57 kDa subunits) (Vacuolar proton pump subunit H) (Vacuolar proton pump subunit SFD)	VATH	-	NM_001140003.1,100,100.000,60,5.18e-26=XM_014187323.1,100,100.000,60,2.54e-24	XM_021590162.1,95,100.000,57,8.25e-23	Vacuolar proton pump subunit H (vath)	tcttttttttttttttttttttttttttaccagtccttCTAGATTACACTTTATTGGAATGCATACTCATAACGTTTTAACAACACATAAGTAACTTTATCAATTTTACATTTATCACAACATCAAGTACTACTCAAATCACTGACATCACTTAGCTGTGAGGTCACTTCACATAATATCATTAATAAACCACAAGCAGGAAATCAAGCTACAGTCAGTAGAGAGGAGACCAGAGGAGAGGAGACCAGAGGAGAGGAGACCAGAGGAGAGGAGAGAGAACAGAGGAGACGAGAGAGACCAGAGAGGAGGAGACCAGAGGAGACAACAGAAGGGTAGAGAACAGAGGAGACGAGAGGAGAAGAGAGAGACCAGAGGAGAAGAGAGAGACCAGAGAAAAGG…
3_2_7_6	C219R076	AGA	AGA	-	N(4)-(beta-N-acetylglucosaminyl)-L-asparaginase (EC 3.5.1.26) (Aspartylglucosaminidase) (Glycosylasparaginase) (N4-(N-acetyl-beta-glucosaminyl)-L-asparagine amidase) [Cleaved into: Glycosylasparaginase alpha chain; Glycosylasparaginase beta chain]	AGA	-	XM_014199199.1,100,100.000,60,2.54e-24	XM_021561398.1,100,98.333,60,8.25e-23	aspartylglucosaminidase (aga), transcript variant X2	aGGAAGTCGAAAAATGAACGTTTATTCTTAATGAAATTCTAAATGAAAGCTAGGTTTGTTTTTAACCAACTAATTTCAAAACGCCTCGTATATTTTCGAAATACTGTGGACCTTAAAAAAAAAAAAACACGTGCAATTAACATGTTCTGCACAAAAATTGCAGTTGAAACTGAAAGCTAACGTTATTTATTTTGCAAAACTTTTGTCAAAATGCTTCTGTGTTTTATATTGATGTTTTTGTTGCCATTTGGTCAAGCAACATTGCCTCTTGTTATAAACACATGGCCATTCGAGCATGCTACAGTGGCAGCGTGGAGTGCTCTGCAGGCTGGGGGCTCTGTGCTGGATGCCGTGGAGAAGGGCTGTGCCCGCTGCGAGGCTGACCAGTGTGATGGCAGT…
CUST_11242_PI417904088	C217R082	NCF2	-	-	Transposable element Tcb1 transposase (Transposable element Barney transposase)	LOC106589969	-	XR_001324976.1,100,100.000,60,2.54e-24	-	uncharacterized LOC106589969 (LOC106589969), transcript variant X2	cagcgatgTTAAAGCTTGGTCGCAAATGGGTCTTCCAAATGGACAATGACCCCAAGCATACGTCCAAAGTTGTGGCAAAATGGCTTAAGGACAACAAAGTCAAGGTATTGGAGTGGCCATCACAAAGCCCTGCCATCAATCCTATAGAAAATTTGTAGGCAGAACTGAAAGTGTGTGAGAGCAAGGAGGCCTACAAACCTGAATCAGTTACAAAATTCACCCAACTTATTGTGGGAAGCTTGTGGAAGGCTACCTGAAACGTTTGACCCAAGTTAAACAATACAAATAAAAAATACTAATTGAGTGTATGTAAACTTCTGACCCACTGGGAATATGATGAAAGAAATAAAAGCTGAAATAAATAATTCTCTCTACTATTATTCTGACATTTCACATTCT…
CUST_18979_PI417904088	C134R013	LIPH	LIPH	-	Lipase member H (EC 3.1.1.-)	LIPH	-	NM_001173770.1,100,100.000,60,5.18e-26	XM_021591360.1,100,96.667,60,3.84e-21	Lipase member H (liph)	TCTTTTTTTTTTTTTTTTTTTTTTTTATTTGATGAACATTTTTATTTGGCCTTACTGCTATTAGCCCATACAAATGCATTGAATAACCAATTCACTACATGGGGAAAAACAGACAGCCCCCCCCCCCAAAAAAATAATCTAAAGGAAGTTTGTTCTTAAGTGTCTGTCGTATATCTGAGCGATATAAGAAAGAGCAAGCAACATGTATTTAACCCTTACTTCTGGCACTAAACAGTCTCCATATTTACTTCCATAAATGTTTTTCAACCGGTACCGGGGGACCTTCAGACAAGTCTTGTGAAGTCCTAGAGCAAAACAACTGATATTTACTGACAGACAAGTCCCAAGACACTTGTGGGGGTCATAGAGCAAAACTGAGAGCACAATCGTGTTCGAGAG…
CUST_23000_PI417904088	C104R036	BGLAPL	-	-	Osteocalcin 2a (OmyOC2a) (Bone Gla protein) (BGP) (Gamma-carboxyglutamic acid-containing protein)	LOC106564582	-	XM_014130727.1,100,100.000,60,2.54e-24	XM_021567820.1,100,100.000,60,1.77e-24	osteocalcin-like (LOC106564582)	ggaaagaaggagaGAAAGAACCAAAGCTCTACTACTACCACTCACTGGTAGTTCAAGAAAGCAGCAAGACAACAACCCAAAAACAACATGAAGTCTCTGACTCTCCTGACCATTTGTGCCGTTCTGTCGGTCTCTCTGTCCATGAACGATCTGGCTCTTGATGTGGTTCTCGATCCTGCTCCTGACCCTGCCACTGAACCAGCACCAGCCGCAGACTCCTCCGCATCTTCATCAGCTTCCTCCTCTTCCTCCTCGGCTTCCGACTCATCAGCCTCTGCCTCAGACTCCTCGGACTCGGACTCTTCCTCAGCCTCTTCCTCATCTTCTTCTTCAGAGTCAGCTAGTGCTGAAGTTACGACAGAGGACCCAGCTGCAGCTACAGAGCCAGAAGTGGTGATT…
CUST_13677_PI417904088	C192R149	PAG1	-	-	-	LOC106588814	-	XM_014178262.1,100,100.000,60,2.54e-24	-	phosphoprotein associated with glycosphingolipid-enriched microdomains 1-like (LOC106588814), transcript variant X4	CCCTTTTAAGGGAATACATTTCGGCTAGCTGTAAGTATGCCCCTTACTCAGAGAGTGACCTAACTATTGTTGAAAATAGACAGTGGATGATTGAATGGTGGCGTATGACAGTTTGGGGGTGCTGTAGTCTGTTTTAATAGGACACCATCTCATTGGTTATTTTGTTCTGTTGTTTTATTCAAGTATGGTACATTGTGTTGGTACAGGCATTTTAAAACATAAAAGTCAAAGTTGGTACTTTTTTATTTTTTTAAAGAAAAGTGAATGAATATTGTTGTTTGGTGTTTATTTTCAAACTGAGTAAGTTTTGACTAAATAACTAGCTATTGCAATGATGATATCTGCATTTGACAGTTAAACAATAATATTATCTTACTTTTCCTCCCATTTCTCTGTTAT…
CUST_21036_PI417904088	C266R119	OARD1	OARD1	C6ORF130 TARG1	ADP-ribose glycohydrolase OARD1 (O-acetyl-ADP-ribose deacetylase 1) (EC 3.5.1.-) (Terminal ADP-ribose protein glycohydrolase 1) ([Protein ADP-ribosylglutamate] hydrolase OARD1) (EC 3.2.2.-)	LOC106567351	CF130	XM_014136490.1,100,100.000,60,2.54e-24	XM_021566241.1,100,98.333,60,8.25e-23	O-acetyl-ADP-ribose deacetylase 1-like (LOC106567351)	ggggattttggttaaattgaaagagaaactgaacgactttgacgatagctcatttacctgtcgtaTAATGTCAACTGTATCTGAAGAGCCAGTGAGCTCTATTGACGAATATAAGAATGCAGAAGGCGGCTGGAGCCTGCGTCATGTGAAGGGGGACCTGTTCTCCTGTCCTGAAGATGAGGTCCTGGCCCACTGTATCAGCGAGGACTGTCGCATGGGGGCTGGCATCGCTGTCAAATTCAAGAAACAATTTAGTGGAGTAGATGAGCTGAAGAAACAGAAGAAGGTGCCAGGGCAATGTGCTGTCCTGAAAAGAAACAAGCGTTTTGTGTACTACCTGATTACAAAGGAAAAATACAGCCACAAACCTACCTATGACAACCTACGGCAGAGCCTCGA…
CUST_11514_PI417904088	C171R093	PPA1	PPA2	-	Inorganic pyrophosphatase 2, mitochondrial (EC 3.6.1.1) (Pyrophosphatase SID6-306) (Pyrophosphate phospho-hydrolase 2) (PPase 2)	LOC106610351	IPYR2	XM_014209669.1,100,100.000,60,2.54e-24	XM_021575278.1,100,100.000,60,1.77e-24	inorganic pyrophosphatase 2, mitochondrial-like (LOC106610351)	cagcatcgacgtGGGGAAATACTCAACGGGAAGCAGGAACTAAATGAAAAGAAGCCACTGTCATGCGTTTGCTTCTGCGCTCTTCGCTATGGTACACATCGGCATTTCTTGGTTCGCATACTGCCTTTAAAAGCGAGCTTGTCACACAAGCAATTACCTCATATCTGATAAAAACGATGCATTATCAAACCGAAGAACGAGGACGACCGAACTCCTCTGACTACAGGATATATTTTAAAACCTCTGACGGGAAATACATCTCTCCCTTTCATGATATTCCACTTATCGCCAATGGAGATCAGGAAAATGATGTGCCATCTAAAAAACTGAAGAAGAATGACAATGAGGTTCTGTATAACATGGTTGTGGAGGTGCCTCGATGGTCCAATGCCAAAATGG…
CUST_17320_PI417904088	C183R120	ABCG20	-	-	-	-	-	-	-	0	ACATTTCTGGGAACTTTTATTTCAGCTCGTAAAACATAGGACCAACACTTCTTGCGCTTATTTTTGTTCAGTATATTCGAAATACAGTTTCTTAAAACCCTTTAGCTGGGCTTGATCATGTTTGCCTGGCACAATGGAACCAATAGAATAGTTGCAAAACTGCAAACCCCGCCCATCTCGCATTCCAGACAGGCTAAAAGCAAAGGATCAAATTATTTGAAAGATTCCAAATAGTTTTTGAACACAGGTCTGGTATGGATACATATATAAAAGGTCCTTTGGGGGGGAACATAGAGGAGGTAGAAGTATAGAGTCAAGGACACCAGCAGAGCCGACGCTATGGCTGCCTCTGGTCAAAATGAGTGCACTATGTAGAGAATATGGTGCCATTTGGGACGC…
CUST_1151_PI417904088	C042R116	CSRP2	CSRP2	LMO5 SMLIM	Cysteine and glycine-rich protein 2 (Cysteine-rich protein 2) (CRP2) (LIM domain only protein 5) (LMO-5) (Smooth muscle cell LIM protein) (SmLIM)	CSRP2	-	NM_001141173.1,100,100.000,60,5.18e-26=XM_014153860.1,100,100.000,60,2.54e-24	XM_021576819.1,100,98.333,60,8.25e-23	cysteine and glycine-rich protein 2 (csrp2)	GGGGGGAGTAGTTTGGTGAGTCCGCAAAGGACACGACGTCGATACGCTGGGATAAAATTGAAGGATTCTCCCACAACAAATACAGCACCAACATGCCAAACTGGGGAGGAGGTAACAAGTGTGGTGCATGCCAGGGGACGGTGTACCATGCCGAGGAGGTGCAGTGTGATGGGAAGAGCTTCCACAAATGCTGCTTCCTGTGCATGGTCTGCAGAAAGGGTTTAGACAGCAACAATGTGGCCATCCATGACACTGAGATCTACTGCAAGTCCTGCTATGGGAAGAAGTACGGCCCCAAGGGCTACGGCTACGGTCAGGGAGCTGGGAGACTCAGCATGGACCGTGGAGAGAGACTGGGGATCAAACCAGAGGAGACCCAGTGTCACAGACCCACCACCA…
CUST_21178_PI417904088	C092R119	SPX2	SLC37A2	-	Glucose-6-phosphate exchanger SLC37A2 (Solute carrier family 37 member 2)	SPX2	-	NM_001140251.1,100,100.000,60,5.18e-26=XM_014197782.1,97,96.552,58,7.11e-20	XM_021623923.1,100,100.000,60,1.77e-24	Sugar phosphate exchanger 2 (spx2)	ttggcaggcatgcatggaaatctatgggaattcattgttggcggagattcacacattaacaggaagtaGGAATAGCCAAGCGACTGAAGCTGTTTTGATCAGTGCGCTGACTTTAAACAAAAAAAGAAACAAACCAGTGTTTTTATAATCAAAGTGCGAAAAATATCGATGGAATATTGTAACTAAAAATTCAAAGTCACCGGAGCTCGAACCAGTGTGAGAAGCTGTTTTGAAGTCCCATGTATAAACTTTCAGTTAGTTTTTATGCTGTTTTTAGATATTTTTGTAGTCCTATTTTTTTAACAGACAATACCAATTGGATGTATACAAGGCGAACGAACTAACTTTTGATGCCATGTTTGAGAGAATAGTGTAAGCGGTTTTAACAAGTTTTTCGAA…
CUST_23909_PI417904088	C111R149	SEC61G	SEC61G	-	Protein transport protein Sec61 subunit gamma	SEC61G	-	XM_014181666.1,100,100.000,60,2.54e-24	XM_021562321.1,100,98.333,60,8.25e-23	protein transport protein Sec61 subunit gamma (LOC106590555), transcript variant X3	gggggactcacgcatgtgcatcagaattgtacgtcttctagattctatcaaaagcttccgaaagcgacgtggcttttcttAGCTACGTCGGTGCCTAGCTACTTCATCTATTTATTCTCAGAGATATTCGTTTGGACACGTTCATATAGTAACATAGCTAGCCGAACCATCATGGACCAGGTTATGCAGTTCGTTGAGCCCAGCCGGCAGTTCGTCAAGGACTCCATAAGGCTCGTTAAGAGGTGCACAAAACCAGACAGGAAAGAATTCCAGAAGATCGCCATGGCAACGGCGATTGGGTTTGCCATTATGGGCTTCATTGGGTTCTTTGTCAAGCTCATCCACATCCCCATCAACAACATCATTGTGGGCGGCTGAACATCTGGAGGTGTGATACAG…
CUST_3818_PI417904088	C069R089	CLIC2	CLIC2	-	Chloride intracellular channel protein 2 (XAP121)	CLIC2	-	NM_001140560.1,100,100.000,60,5.18e-26=XM_014199024.1,100,100.000,60,2.54e-24	XM_021561459.1,100,100.000,60,1.77e-24	chloride intracellular channel 2 (clic2)	ggggggagcccacaaACAAAACGTCCCAGCTACAAGGGTCTTACACTGCCTCCTAAGATCCATATAAAAACCAGCACACTAGAGCACGGAGATATATAGAAGACTCAAGGGAAGAGTGACGTTTTACTTCCGTGGACTTGGAGTCTTCAGAGTTAACAGGTTTGTTTTGCTGAGACCCGAGGACACTTGTTGGAGAAACATTTCTGAACTTTGCACAACACAGCCCAGCTTTTGAAAAAAATGGCGCAAAGACAGAACTCCGACAAAGACCCGACTATTGAACTCTTCATAAAGGCTGGCCACGATGGAGAGAACATGGGCAACTGCCCCTTCTGCCAGAGGCTCTTCATGGTCCTGTGGCTAAAAGGAGTCAAGTTCACCGTGACAACCGTCGACATG…
CUST_2475_PI417904088	C175R073	PSD3	-	-	-	LOC106571427	-	XM_014144590.1,100,100.000,60,2.54e-24	XM_021601643.1,100,98.333,60,8.25e-23	PH and SEC7 domain-containing protein 3-like (LOC106571427), transcript variant X9	CAATTAAGTACAGTATTTTATTAATTGAAACCACCTACAGTTGTATTACCACCGACATAGTGTTACCAATCCTGACCTAAGGGCGTAAGACACGCTCTGGGCCGAAGAAGAGATCACTTGAACAACCAAACAATGCAATCCTGGGCCTTTGAAAAAAAACACACACACAGGGCAACAGTTATATTTAACAACATTTACAGAGTTAAAGGATTGTACAGGATCACAGCTTTCAGAGATATTTGATGCGTACGTACGTGTAGAGAGAAAGAGCCTCGTCGGAGGCTTAGTTGCATTGTTTTCTACGGTATAGAACAATCAAGAGGCATGGGAATCTATAGGGCACACAGTCTGTCTTCTCAGACAGAGGTGCAGGATTGAGTCTATTCTAACACAAGTGAT…
CUST_15720_PI417904088	C041R092	SSPN	SSPN	KRAG	Sarcospan (K-ras oncogene-associated protein) (Kirsten-ras-associated protein)	SSPN	-	NM_001146512.1,100,100.000,60,5.18e-26	XM_021601152.1,100,98.333,60,8.25e-23	sarcospan [Kras oncogene-associated gene] (sspn)	AAAGAGAGAGAATAGAGAAAGAGAAAACAACCTCCCAAGGAGCTGAAGAATACGCCCTAGTCTCATCTCAAGGCAGAAGGTGAAGAATGGGAGAAGGAAAGAAGGGATCTGGAGGAGGGGAGAAGAGCGGAGGAGCGCCCCCCATCCAGGAGAAGAAAGGGGGGAAAGCAGACGAGGGAGGCCCAGCGCCCGAGGATGCCCACAAGTGCTGTGGCTGTCGCTTCCCCCTGCTCATTGCCCTGCTGCAGCTGCTGCTGGGGGTGGCCATCACAGCCGTGGCCTTCCTCATGGTCACCATCAGCCCCTCACTTCTGGCCAGGGAGACACCACACTGGGCCGGCATCATTCTGTGTGTGGTCTCCTTGCTGGGCTTCCTCCTCTACTGCATCACTTACGTAC…
CUST_13405_PI417904088	C121R160	LCP1	LCP2	-	Digestive cysteine proteinase 2 (EC 3.4.22.-)	LOC100846955	CYSP2	XM_014178179.1,100,100.000,60,2.54e-24	XM_021572417.1,93,98.214,56,1.38e-20	digestive cysteine proteinase 1 (LOC100846955)	GGGGGGTTGCAGAACTAAATACGGTATGTTTACGTCTTTCTGACTGCTCTCATATACGCACAGAACAACCTACGACCAGAAGCTATGAGGGACTGGTACATTGTAACTGTGCTATTGTGGACCGTACTAGCCACAGAGGGAAAAGCCCTCCCTTCAGTCCCAGACTTTGGGAAGGCATACCATGTCAAAGGTGTGATCTACCTGCCCTATGCTGAGATAAAGGAACCATTTGAGGCCTGGTTCGACCTGAAGGGGAGGACCAGCCGCATCGACTATTACCACGGCCAGGTGTCAACGTACCAGATGGGGATGGAGCTTCCTTGGGGATCATCCTATAAGATCACTCCTGAGACCACAGAGGTGGAGCTAAACATTATGAAGTGTTTCCAGGTCAATGGA…
CUST_19165_PI417904088	C085R064	BACE2	-	-	-	LOC106581128	-	XM_014162943.1,100,100.000,60,2.54e-24	XM_021588120.1,100,96.667,60,3.84e-21	beta-secretase 2-like (LOC106581128)	gggtgcttgaagagtggtcttggtagttgctcttgaatacaagattagagaaaaagaacctgcaccatggtGCTCTCTACTTGTGTAACTCTTTATTCATCATATTCAAGTGAATGGTGAATTGTTTTTATCCAGGTTGGAATAGAGGCCGGGCGTTTTATCACCCTGGAATGAGAGCCTTTACTTTAATCTGATCAATTTAATTATATACAATCACAATTTTGGCACTGATACATTTAAACAATTGTGAACAGTTTGATACAAAATCAGGTGCAGATTTAAATTAAACACCTTTGCAAAAAAATTATTAAACTTTTTGAAAATACAGTACAATACTTTTTTTGGCCAATACATCTCCCCTATTGAAATCATGGGTAATGTAAAATTTAGAAAATATTA…
CUST_12875_PI417904088	C053R026	LEG	-	-	Beta-galactoside-binding lectin (14 kDa lectin) (Electrolectin)	LEG	-	NM_001141159.2,100,100.000,60,5.18e-26=XM_014203183.1,100,98.333,60,1.18e-22	-	Beta-galactoside-binding lectin (leg)	ggtggactgcagtccgaagccagctaagcattcttcccgctgtgaacatttgcggtttgtgcagtcaagatgagtGGTGTTGTGGTAAAGAACATGTCCTTCAAGTTGGGCCAGACCCTGACCATAACAGGGATCCCTAACTCTGAAGCAACACATTTTGTCATCAACGTGGGCAACAGCGAGGATGACATCGCCTTGCACATGAACCCTCGCTTCGACGCCCACGGAGACACCCGGGCCGTGGTGTGTAACTCCTACCATGGAGGCAAGTGGTGTGAGGAGCACAGAGAGGGAGGATTCCCCTTCAACCAGGGAGAGGAGTTTAAGATAAATATCACTTTCACCAAGGAGCAGTTCCTAGTTTCGCTTCCCGACGGCTCTGAGATCCACTTCCCCAAT…
CUST_34668_PI417904088	C151R049	FBF1	FBF1	-	Fas-binding factor 1 (FBF-1)	-	-	-	-	0	CTGGCTGAGCAGCAGAGGCAACTAGAGAAGGAGCGCTGGAGAGTGAATGCAGAACAGGCTAAGGCCGACTCATCTCAGAGAAACCTGGTCGAGGAGAGACGCTCTAACTCAGCACATCAGCATGGAGAGAGAGGAGCTGGAGAGGGCAAAAAGTGCCCTGTTGGAGGAGCAGCAGGTAATGCTGTGCAGAGGAGAGGAGGAAGCTGGCGGCTGAGTGGACCCAGTTCCACACCCAGGAGAAGCAGAGGCAGGACCGGGCGGCCAGCCGGGCACTGGAGAGGGATGCCCACAGAGAGGGCTCCATCATCAGCATGGCACAGCAGACTAGGGGCTAGGATAGGACAAGAGGCTTGTATGTCTAGCATTGTCGCATGCAAACTGCCAGCGTTTTACCATGTT…
CUST_5978_PI417904088	C109R024	TMEM183A	-	-	-	TMEM183A	-	XM_014166985.1,100,100.000,60,2.54e-24	XM_021609806.1,100,95.000,60,1.79e-19	transmembrane protein 183A (tmem183a)	CTGGGATTCCTTTATTTTTTTAAATGGTTTAAACTGTACAAATGCTTTCAACACAAAATCTATCAAATATATCTATGTAGCCACACTCCCGAGTGGTGCAGCGGTCTAAGTCACTGCATCTCAGCGCTAGAGGCGTCACTACAGACACCCTGGTTCGAATCCAGGCTGTATCACAACCAGAAGTGATTGGGAGTCCCATAAGGTGGCGCACAACTGGCACAGCGTCGTCCAGGTTTGGCTGGTGTAGGCCGTCACTGTAAATAAGAGTTTGTTCTTAACTGACTTACCTGGTTAAATAAAATATTTTTTTAAAGTTACACTTTCCATGTTACCTCAGTTTACCACAAAACGGCGCTATTGTCAAGGAAACAGTTGGATGGGACTAAATACTGTATTACT…
CUST_21846_PI417904088	C099R123	GFI1B	PDCL	-	Phosducin-like protein (PHLP)	LOC106607026	-	XM_014203569.1,100,100.000,60,2.54e-24	-	zinc finger protein Gfi-1b-like (LOC106607026)	CCTTGCCAGCCCTGCTGGTGTACAAAGGAGGAGACCTGATTGGGAACTTTGTGCGCATCACAGACCAGCTAGGAGAGGACTTCTATGCTGTGGATGTGGAGGCGCTGCTGCAGGAGTATGGGCTGCTGCCGGACAAACCTGTCCTTGTCACTAAGACCATCCGCAACGGCGCCATCACACAGAGCGACGATTCTGACCTTGACATAGACTAGAGAACAGTCCTGCACATATATAGAAACATAGACTAGAACCCCTATGTGTGTGTTGTCGGGTGTATGTGTGTAAATACAAATACACTGAGGATACAAAACATTGAGAACACCTGCTCTTTCCATGACATAGACTGACCAAGTGAATCCAGGTGAAAGCTAAGATCCCTTATTGATGTCACTTGTTAAA…
CUST_40772_PI417904088	C260R126	HPN	HPN	TMPRSS1	Serine protease hepsin (EC 3.4.21.106) (Transmembrane protease serine 1) [Cleaved into: Serine protease hepsin non-catalytic chain; Serine protease hepsin catalytic chain]	LOC106605629	-	XM_014201488.1,100,98.333,60,1.18e-22	XM_021625461.1,100,100.000,60,1.77e-24	serine protease hepsin-like (LOC106605629)	tAGCATGTTCTGTGCTGGCTTTGAGAAGGGTGGTACCGATGCCTGTCAGGGGGACAGCGGGGGCCCGTTTGTGGCTGAGGACTCCCTGTCCAAGGCCAGCCGCTACCGCCTGCTGGGGGTGGTGAGCTGGGGAACAGGCTGTGCCATGGCCAAGAAGCCTGGCGTCTACACCAGAGTGTCCCGCTTCCTACCCTGGATCTCCTCAGCCATGAGGACGTATCACAATTCACCAGGAGTGCACAAAATGGCGCGTACATGGGAGCACTGACCTTTAAGGGATCAGAAATTACCAAAATATTATCCATCAGACTTACTGCACTTCACCTGTCCAAAAA*CCCATCCTTTAGGGGAACCTTGTGCAGAAATTGGATGTATAGGTAAATTCAACTAGATTACCG…
CUST_17131_PI417904088	C010R097	-	-	-	-	LOC106587131	-	XM_014175215.1,100,100.000,60,2.54e-24	-	uncharacterized LOC106587131 (LOC106587131), transcript variant X5	ATCAATTATGATTTTTATTTGTTTATAGGATTGTAGTAATTAAAAACAACAATTAAAATCTTCATCCTATTTACAAAACCTGAACAGTGTCAAGGTGTGGGATTTGAAAAGGAATTTCACAGTGCGAAATACACAAAAAAACATCATACAAAAGATGATTCACATTTTTGGGGGGGACAAAGGAGAAAAGCTTTCATCTCAATTATCGCATTAATAACAAACAAAGTCACATATAAAAACATACAAAATGTAGCAACAAAAATGTCTGTTATACGGGTTAAAGTGCGGAGTAGGCCTCAAGCATGCAAGCATCTATGTGCAGAAAACAGGAAGTTGCCTTTTTTTCCAACAAATCACTTGATATACACTTCATACTGTCACGCCCTGACCTTAGAGTTC…
CUST_31443_PI417904088	C143R066	TGM2	TGM2	-	Protein-glutamine gamma-glutamyltransferase 2 (EC 2.3.2.13) (Tissue transglutaminase) (Transglutaminase C) (TG(C)) (TGC) (TGase C) (Transglutaminase-2) (TGase-2)	LOC106566906	-	XM_014135480.1,100,100.000,60,2.54e-24	-	protein-glutamine gamma-glutamyltransferase 2-like (LOC106566906)	GGGGAACTGGGGGAGTTTGTACTGCTGTTCAATCCCTGGTGTGCCAAGGATGCGGTATACATGGAGGAAGAGAGAGATAGGCAGGAGTATGTGTTATCCCAGGCTGGTCTCATCTACAAAGGCACAACAAAACGAATCAAAGCTTCCCCATGGACATTTGGCCAGTTTGAGCCTGGGATGCTGGACATCTGTCTGAAACTTCTGGATGAGAATCCTAAATACTCGTCAGATGCCGATGCAGACTGTTCTGGAAGGAGAAACCCAGTTTATGTGACTAGGGTGATCAGTGCCATGATCAACAGTAATGATGACAAAGGTGTGCTAGTGGGGAACTGGTCAGGTGACTATGATGATGGCGTGAGACCCTCTCACTGGACAGACAGTGTTGCCATACTACAT…
CUST_7502_PI417904088	C053R054	ZNF710	ZNF710	ZFP710	Zinc finger protein 710	ZN710	-	NM_001173737.1,100,100.000,60,5.18e-26=XM_014124780.1,100,100.000,60,2.54e-24	XM_021571468.1,100,98.333,60,8.25e-23	Zinc finger protein 710 (zn710)	AAAGGTAAATAAATTTATTATTTTACAGTATTGTCTGGTACACATTTTACATAGTTCTAGCAACAGGATATTTCCACACCAATGTGTAACACAGAAAGCCATTCAAGTTTCAGATATTTATTTCCCACTCTAAATAGTTTTCTCAAATTTGCATTTTGTTTATTAAACGCACATCAACATTGTGTATTGATACCTAGGTGATGTCTAAAATTAAGCAGGGAAAAAATATAGTGAATTTCTCAAGTTTTCAGCTGGGTCTGGCCCTGTCATGTTGGGAGTTGTCGTTCATCACTTTAGACCAGTGTGCAGCATGATGGATAGCACACTCCAGGGCAATTCATTTCTGTCCAAAGTTTTAGGACCGTTCCTGTTGAGACTCCGCCCTGAACCAAAACCACC…
CUST_16965_PI417904088	C252R087	NPL	NPL	-	N-acetylneuraminate lyase (NALase) (EC 4.1.3.3) (N-acetylneuraminate pyruvate-lyase) (N-acetylneuraminic acid aldolase) (Sialate lyase) (Sialate-pyruvate lyase) (Sialic acid aldolase) (Sialic acid lyase)	NPL	-	NM_001139839.1,100,100.000,60,5.18e-26=XM_014215712.1,100,100.000,60,2.54e-24	XM_021603933.1,100,98.333,60,8.25e-23	N-acetylneuraminate pyruvate lyase (npl)	TCTTTTTTTTTTTTTTTTTTTTTTTTTTTAACATTCCAAAACGGTTGATCTTTTATTTCATATGCAATGTCCAAGAGTGTTTACAAAAATGATTCAAGTTTTGTTTAGATTTCCCTTTCACTCGCATACAAGTTCAGTTATACTGTAATTCACATTAAAGATAATATCAAGACTACAATACTGGAAAGAGTGCAGTTCACACTATTGAGGTCAGTGGCAATTCCACTTATAGATGTACTAATTTACTCAGGGTTAGGTTACAATCTAATACAGTACTTATATGAAACGGTATCAACCACACAAAAATGCATTGTTGTTCCTGTAAACGACAAAGAAGAAAGTAAAAACAAATAAAGTATGAAGAAAACAACCCTGCAGGTCTCACTATAAAAACAATAC…
CUST_41430_PI417904088	C066R015	ICAL	-	-	-	-	-	XM_014131768.1,98,100.000,59,9.14e-24	NM_001124645.1,100,100.000,60,1.55e-26	Calpastatin (ical), transcript variant X28	ggggggggttatgcggaaacgatagactcgtctggcaaacttaactaaaaagagaattgcaaacctagcagtctcttgacATCACCACAGCCGCCCTATATAGACACTTCGTTTAGGGTACGATAATGGTCAGTCGGCTTTGCTGTAACATTGTTTGAACATACGGGACGGGAGTGGCCCTCTGGAACGCATGGGAAATAATTATGCCTGAAAGGTACACGGGAGACCGGTTAGACTAGAGGCTACACATATTTAGACAGAGGTATCTGTAGGCAATAGACGAGTCTTCTCATCTTCACCGCTTCTCACAGTTTCCATCATGGCGTATGCAGCCTATTGGACCAGCCAACAGAGAACAGATCCTAGTACCACACTTGGGGAGAAGCAGGGGGATGGCCG…
CUST_17848_PI417904088	C140R093	DUS6	DUSP6	MKP3 PYST1	Dual specificity protein phosphatase 6 (EC 3.1.3.16) (EC 3.1.3.48) (Dual specificity protein phosphatase PYST1) (Mitogen-activated protein kinase phosphatase 3) (MAP kinase phosphatase 3) (MKP-3)	-	-	NM_001165367.1,100,100.000,60,5.18e-26	XM_021576685.1,100,98.333,60,8.25e-23	Dual specificity protein phosphatase 6 (dus6)	ttggcgctgcagagagcacatcgacgacccagtgtcgacaacaacaaaatacgcttattcacaacgagaacgttgggaatAGACGACAACAGAAATAATTATTGGAAATTCAAGTGCTTTGCATCTGTAACTGAACTGCAATCAATCCCTCTTATTTAGATTTTTACAGAAGAATAATATTTTCTATGCGAAAGCGGCAGTTATATAACACGAAGACAACGTCAGTGCTGGCCAGTGAGTCATTGATAAATACATGGGACATTCTTCACGCAGCTGCATGAATGAGTGTTACTGCTAGTGTAGGCCTATAGGCAATCTACAGTCGGATATTTAAGAAACAATCTTGTTTTGTTGATTTCGTTTCAAACTAGGCCTACAAAACCGCCAAGGTCGTGAGAA…
CUST_2589_PI417904088	C162R165	OARD1	OARD1	C6ORF130 TARG1	ADP-ribose glycohydrolase OARD1 (O-acetyl-ADP-ribose deacetylase 1) (EC 3.5.1.-) (Terminal ADP-ribose protein glycohydrolase 1) ([Protein ADP-ribosylglutamate] hydrolase OARD1) (EC 3.2.2.-)	LOC106567351	CF130	XM_014136490.1,100,100.000,60,2.54e-24	XM_021566241.1,100,100.000,60,1.77e-24	O-acetyl-ADP-ribose deacetylase 1-like (LOC106567351)	tcgattgctagctgataatgtccacatcttggttcaattgaaagagaaactgaacgactttgacgctagctcagtaagttGCTAAATTAAGAAAAATACATCAAAGCTAGCCTTATGCAACAGTCAGCCAAATGTGCTTGTTGTAGTGCTAGCTAATACTGCAGGTTCAAATTGTCAAATGTACTTTAATTTAAACAACAATTGCCTATCCCTCCCTCTACCTGGTTGATTACAGTTTACCTGTCGTATAATGTCAACTGTATCTGAAGAGCCAGTGAGCTCTATTGACAAATATAAGAATGCAGAAGGCGGTTGGAGGCTGCGTCATGTGAAGGGGGACCTGTTCTCCTGTCGTGAAGATGAGGTCCTGGCCCATTGTATCAGCGAGGACTGTCGCAT…
CUST_1508_PI417904088	C226R063	VATH	ATP6V1H	-	V-type proton ATPase subunit H (V-ATPase subunit H) (V-ATPase 50/57 kDa subunits) (Vacuolar proton pump subunit H) (Vacuolar proton pump subunit SFD)	VATH	-	NM_001140003.1,100,100.000,60,5.18e-26=XM_014187323.1,100,100.000,60,2.54e-24	XM_021614330.1,100,98.333,60,8.25e-23	Vacuolar proton pump subunit H (vath)	tcttttttttttttttttttttttttttaccagtccttCTAGATTACACTTTATTGGAATGCATACTCATAACGTTTTAACAACACATAAGTAACTTTATCAATTTTACATTTATCACAACATCAAGTACTACTCAAATCACTGACATCACTTAGCTGTGAGGTCACTTCACATAATATCATTAATAAACCACAAGCAGGAAATCAAGCTACAGTCAGTAGAGAGGAGACCAGAGGAGAGGAGACCAGAGGAGAGGAGACCAGAGGAGAGGAGAGAGAACAGAGGAGACGAGAGAGACCAGAGAGGAGGAGACCAGAGGAGACAACAGAAGGGTAGAGAACAGAGGAGACGAGAGGAGAAGAGAGAGACCAGAGGAGAAGAGAGAGACCAGAGAAAAGG…
CUST_23281_PI417904088	C019R079	PLSCR1	PLSCR1	-	Phospholipid scramblase 1 (PL scramblase 1) (Ca(2+)-dependent phospholipid scramblase 1)	LOC110531812	-	-	XM_021615246.1,92,98.182,55,4.96e-20	phospholipid scramblase 2-like (LOC110531812), transcript variant X4	ttggcgaaatgacagcaacgctgtaggtttcgtatgatacaaagacagttgtttagccgatcgtttattttacggctgctACGTTAGTTTACTGATAGGCAAATAAGACTGTCAAAGCAAGTAGGATTCTTCACATTTCCCTCGGTTCTTCTGGTCAAGAACCACCAAACAACAAGCAATTCCTTTTTGGTTTAAGGAAAGACACCAAGGCAAGAACCGCCGGGTCTGGTCTACTTAGTTCATTGACTTTCATTGAACCAGAAAACAACAACGAGTGGGTTGTCGCTTCCTCTTCTGTCTCAGAGACTACGGGAGTGGACAAGAGAGGAAGTCCTGCTATCCACTGTGTGTCCACTAACTAAGTCATCATGTCAGCCCCAGGTAAATGTCTTCTACACC…
CUST_9795_PI417904088	C265R079	LAL	-	-	Putative lysosomal acid lipase/cholesteryl ester hydrolase (Acid cholesteryl ester hydrolase) (LAL) (EC 3.1.1.13) (Cholesteryl esterase) (Lipase A) (Sterol esterase)	-	-	-	-	0	aagtagcacgcttcgtatacatttgatttaaatacaatgtaacaacttccgcggcaactgacaaatttacctgctcctcgCGATTTGTCCCAGACAACAATAACTTTGTTTGGCATTTCTCTTCGCAGAAGACAAGCGCATAAACTGCATGTCAACCCTGCACCAACTATAAGAACTCGTGACATTGAGTTCAACTTAAACTATAAACAACTGTTGCTGGCAATACACAAATAATTTACTTTTTAAGTTTCGTTGCGCGTGTTTGGTAAAGCCAGATTTCACATAGTAGCCTAAAGATGAATGGCTGTTGGCCGACCAAAATGTTCCCTTGGATGCATGGAAAAAACAGTTTATTCAAGTAAAATAAACGTTAGTTTCTATTACAAAATCGCACTGTCA…
CUST_8668_PI417904088	C047R075	PLBD2	PLBD2	-	Putative phospholipase B-like 2 (EC 3.1.1.-) (76 kDa protein) (p76) (LAMA-like protein 2) (Lamina ancestor homolog 2) (Phospholipase B domain-containing protein 2) [Cleaved into: Putative phospholipase B-like 2 32 kDa form; Putative phospholipase B-like 2 45 kDa form]	PLBD2	-	XM_014161166.1,100,100.000,60,2.54e-24	-	phospholipase B domain containing 2 (plbd2)	CAGGCGCACACAGATGTCAGTAACAACAGAGAAGATGTTTATGTTTTTATGTGTTTTTTATTTATCATGGACGTCTGTTGGGGCCGAGATTCATTCTGCAGTTCTCGATAAACAAACTGGCCAGCTGTCCTTGGAGGAGGGGTTCCGAGACGACTTTGTAGCCTGGGCGAACTTTACCGACGACATCAAGAACTCGGGCTGGGCATATCTGGAAGTGACCACTAGCGGACGCTATAATGATAGCATCCAGGCGTATGCTGCCGGAGCCGTTGAGGCTGCAGTCACCTCCCAGCTGATCTATAAGCACTGGATGAACACTCTTATGGGGTACTGCGGCCCGTTTACCTTCGAGTCGGGATTCTGCCAGAGACTGAAGGATTACATCACTTCCAACCTGCA…
CUST_28627_PI417904088	C215R031	DMXL2	DMXL2	KIAA0856	DmX-like protein 2 (Rabconnectin-3)	DMXL2	LOC100286620	XM_014175586.1,100,100.000,60,2.54e-24	XR_002471040.1,100,98.333,60,8.25e-23	dmX-like protein 2 (LOC100286620)	TTGGGAAGAGGAACCTGAACAATGTGAAGAGAATGACCTCCCACCCCATATTCCAGTACTATATGACTGGGGCTCAGGACGGCAGTGTCCGTATGTTTGAGTGGAACAGGCCACAGCAACTCATCTGCTTCAGACAGGCAGGCAACGCCAGAGTCACACGCCTCTACTTCAACTCACAGGGAAACAAGTGTGGTGTATCAGATGGAGAAGGCTTCCTCAGTCTGTGGCAGGTCAACCAGACCTCCTCCAACCCCAAGCCCTACGTGAGTTGGCAGTGCCACTCTAAGACCTGTGGTGATTTTGCCTTCATCACTTCCTCCAGCCTCATCGCAACGGCAGGACAGTCCAACGACAGCAGAAATGTATGCCTGTGGGACACTCTTGTTTCACCTAGTAACA…
CUST_1466_PI417904088	C176R040	SLC6A6	SLC6A6	-	Sodium- and chloride-dependent taurine transporter (Solute carrier family 6 member 6)	SLC6A6	SC6A6	NM_001123630.1,100,100.000,60,5.18e-26=XM_014134772.1,100,100.000,60,2.54e-24	XM_021566845.1,97,96.552,58,4.96e-20	solute carrier family 6 [neurotransmitter transporter, taurine], member 6 (slc6a6)	gttggcacaagtttaagggacagctcgagctataaaatacctggCAGCATGGCACAGAAAGAGAAACTCCAATGTCTGAAGGATTTCCACAAGGACACGTTGAAGCCTTCGCCAGGGAAGAGCCCGGGCACGCGGCCGGAGGACGAGGCAGAGGGCAAGCCCATCCAGAGGGAGAAGTGGGCCAGCAAGCTAGACTTTATCTTGTCCGTGGCCGGAGGCTTTGTCGGTTTAGGGAACGTGTGGCGCTTCCCGTACCTCTGCTATAAGAATGGTGGAGGTGCGTTTCTCATTCCCTACACCATCTTCCTGTTTGGTGGAGGCCTGCCGGTGTTCTTCCTGGAGGTGGCTCTGGGCCAGTATACCTCTGAGGGAGGCATCACCTGCTGGGAAAAACTCTGC…
CUST_12191_PI417904088	C248R155	MSMO1	MSMO1	SC4MOL	Methylsterol monooxygenase 1 (EC 1.14.18.9) (C-4 methylsterol oxidase)	MSMO1	-	XM_014181991.1,100,100.000,60,2.54e-24	-	methylsterol monooxygenase 1 (msmo1)	cagccgcatcaagtgttgtccagtctcctcccagcccatccccaccagccaatcagaatggaggtgaacagtacggccacCATCTTGTCCTCAGCCTTCCTGGCTGTGGAATATGTTGATGCTGTCTTACCTGACAACCCTCTTCAGCCTTCACTACAATACGCCTGGGGGTATGTGAATGAGAACTACACTAAATTCCAGATCGCCACCTGGGGTTCTCTCATCGTCCATGAGGCCATCTACTTCCTGTTTTGTCTACCTGGTTTCGTGTTTCAGTTCCTTCCCTTCATGCAGAAGTACAAGATACAACAGGATAAGCCAGAGACGTGGGAGAAACAGTGGAGATGCTTTAAGATGCTGCTTTTCAATCACTTCTGTATCCAGCTGCCGATGATCTGT…
CUST_19722_PI417904088	C082R167	FIS1	FIS1	TTC11	Mitochondrial fission 1 protein (FIS1 homolog) (hFis1) (Tetratricopeptide repeat protein 11) (TPR repeat protein 11)	LOC106577644	-	XM_014155944.1,100,100.000,60,2.54e-24	XM_021615040.1,100,95.000,60,1.79e-19	mitochondrial fission 1 protein-like (LOC106577644)	AAATCAAAATGTTTTTATTTACAATCAAAACTGGAGAAAAAAATAAAATAGCTGAAACATCTTGGTATTTTGATACATAAAACAAAATCTGTTAGTATCATGCCATTATGATAACTTGAGTAAATGGGGTTATATTATGGATAAATAATGTTATTTTTTACTTGTTGTCTTGCATATACACTGTCAATTAAAGACAAATGAAAGCCTTTTCCCGAGGGCTGTTTTACTCTCTTGCACTGTCTGGGAATTCATCTTTACCCAATCCCTAAGAAAAGATGCCCCCTGTGGACAACATGAGTGATTCACAGCACAGCTGCCTAATTCTTACCAACTACACATACACACTTACCAGCTTGGACACTACACAACACTTACCTCTAAACATAAGACACTTCCCTA…
CUST_3930_PI417904088	C239R011	CPEB1	-	-	-	LOC106587658	-	XM_014176245.1,100,100.000,60,2.54e-24	XM_021607962.1,100,100.000,60,1.77e-24	cytoplasmic polyadenylation element-binding protein 1-like (LOC106587658), transcript variant X4	tgggcttcatttaaccagtcgcatttcagacatttttacgcagttttttactaatttgtacacaaacggttttaagtcatGACAAGGAAATTTGGAACCGAATTCTACCTGGCGGCTTTTTAATTTTTTTCCCTCCCCTTGGTTTTTCCTCACCCTGAAGTATTAGTCTGGGGCTGGTGGTAGATTTGTTCTCCCTACGATGTTCTACTGCAG*GGGTAGGCAACCCTGTTCCTGGCAGTGTCGCAAGGTCTGCAGGATTTTGCTCCCAACTAGACACCACACCTGACCAATTGATCTGTTCAATGATTTCCTAAATTCAACACACCTGGTCTTCCAGGTTGGTTAAAATATATAACATGTAGTGTCTGTGGCACTCCAGGAACAGGGTTGCCTTACCC…
CUST_36146_PI417904088	C141R029	SDHA	SDHA	-	Succinate dehydrogenase [ubiquinone] flavoprotein subunit, mitochondrial (EC 1.3.5.1) (Flavoprotein subunit of complex II) (Fp)	LOC110520843	-	-	XM_021598267.1,100,98.333,60,8.25e-23	succinate dehydrogenase [ubiquinone] flavoprotein subunit, mitochondrial-like (LOC110520843)	ggtccggaattcccgggtcgacccacgcgtcgcTCAGCCCACACCAGCACCGGGGATGGCAACGCCATGGTAACCAGAGCTGGCCTACCATGCCAGGACCTGGAGTTTGTACAGTTCCACCCCACCGGTATCTATGGTGCCGGCTGCCTCATCACTGAGGGTAGCCGTGGCGAGGGAGGGATCCTCATCAACAGTGAAGGAGAGCGCTTTATGGAACGCTACGCTCCCAACGCCAAAGATCTGGCCTCCCGGGATGTGGTGTCACGTTCCATGACCATTGAGATCCGCGAGGGAAGGGGTTGTGGTCCGGAGAAGGACCATGTGTACCTGCAGTTGCACCACCTGCCCCACCAGCAGCTGGCCACCCGCCTGCCTGGTATCTCTGAGACCGCCATGATC…
CUST_9916_PI417904088	C194R021	CYB5A	CYB5A	CYB5	Cytochrome b5	-	-	-	-	0	GGGGGAGCTTCCCGGTGCGTGCCAGGAATTACAATACAAATCTCTGAACTCACTTTGTCATCTAGGCTAAATGTCGTTACGTGTGTACTTGTACATAGTCACTGCATCGAAATATTTGTAAGATTGGAACATAATTCTTTCCTGGATTCACATTAGGTGTATTTATTTAAAATATAAATGGAGGATAAAGAGGAGAACGGACAAGCTGTAAAATACTACCGACTGTCAGAAATCGAGGAACAGAATACGTTCAAGAGTACATGGATTATAATCAATTTTAACGTCTACGATGTCACCAAATTTCTGGAAGAGCACCCAGGTGGAGAGGAGGTCTTGAGGGAACAGGCAGGCGGTGATGCCACAGAGAGCTTTGAAGATGTCGGGCACTCATCAGATGCC…
CUST_26170_PI417904088	C157R134	CSF1R	CSF1R	FMS	Macrophage colony-stimulating factor 1 receptor (CSF-1 receptor) (CSF-1-R) (CSF-1R) (M-CSF-R) (EC 2.7.10.1) (Proto-oncogene c-Fms homolog)	M-CSFR	-	XM_014199902.1,100,100.000,60,2.54e-24	NM_001124738.1,100,95.000,60,1.56e-21=XM_021559488.1,100,95.000,60,1.79e-19	macrophage colony-stimulating factor 1 receptor 1-like (LOC106604846), transcript variant X3	agGAAacaacTACGCCTTTATCGACCCGACTCAGATGCCGTACAATGAGAAGTGGGAGTTTCCCAGGGACAAGCTCAAGCTAGGAAAGATCCTTGGAGCCGGGGCCTTTGGGAAGGTGGTGGAGGCCACAGCCTATGGTCTGGGGGAGGACGACAACGCAATGCGAGTGGCTGTAAAGATGCTCAAAGCCAGGGCCCACTCAGATGAGAGAGAGGCTTTGATGTCAGAACTGAAGATTCTGAGTCACCTGGGACAGCACAAGAACATTGTCAACCTCCTGGGAGCCTGCACTCAGGCGGGACCTGTACTGGTGATCACTGAGTACTGTAGTCATGGCGACCTTCTGAACTTCCTGCGACACAAGCAGGAGACCTTCCTGAACTTTGTCATGAACATACC…
CUST_40793_PI417904088	C121R145	KAL6B	KAT6B	KIAA0383 MORF MOZ2 MYST4	Histone acetyltransferase KAT6B (EC 2.3.1.48) (Histone acetyltransferase MOZ2) (MOZ, YBF2/SAS3, SAS2 and TIP60 protein 4) (MYST-4) (Monocytic leukemia zinc finger protein-related factor)	LOC106610434	-	XM_014209803.1,92,92.727,55,2.58e-14	XM_021597798.1,92,92.727,55,1.80e-14	transmembrane protein 43 (tmem43)	cggctcgagtttaatgagactccattggattgtaatcatcgtcatgtcggatttatgtaAACTACAACATTGTAACAAAATGGCGACTGTTTAGGTCACGTCAGTAATGCAGGGCAGCACTGTTATTTCTTACAACTCAACTGATACAAG*******TCAA**GGAA*TTGT**G***TGACCTCATTTGAAGAAATTGTGTTCTAGGTCGTTCGGTAAAAGTCCCAACCTTCAAGGAATTTACATTCGGGCTACTT*CTTCCTTCTTTTGTGAGGTGAC**GTGAGTTACTACCTTGGATGAAGATTTACAGCAGGATTGTAAATGTGTTAATGCCGAGGTGGAACAGTACCTATATTTTTGTTGTTGTTGTTGACCTTTTCAAGATGTGCTGGATGT…
12_4_17_4	C015R017	TEX261	TEX261	-	Protein TEX261	TEX261	-	XM_014207063.1,100,100.000,60,2.54e-24	XM_021577847.1,100,100.000,60,1.77e-24	protein TEX261 (LOC106608873), transcript variant X2	gggggcctcaatgtccgactgccagtgggaggaaCTTTGACCAACCAGCAGTTAGCTAAATTATTTCATAGCACTTACTGTCACTTTTGTTTTTAATATATATATGTGTGGTGTTTTACATGAAACGAGATGTGGTTTATTTATTTACTAAGTTGGCTGTCGTTGGTGATACAGATATCTTTCATCACACTAGCAATTGCTGCTGGCCTGTATTATTTGGCAGAACTAATAGAAGAGTACACAGTTGCCACTAGTCGAATAATAAAGTACATGATACTGTTCTCTACAGGTGTGCTGACGGGCCTGTACCTGTTTGAGGGCTTCCCATGGCTGATGATGGGCTGTGGTCTCTTCACCAACCTGGTGTACTTTGGCCTCCTGCAGACCTTCCCTTACATA…
CUST_32215_PI417904088	C172R064	MATK	MATK	CTK HYL	Megakaryocyte-associated tyrosine-protein kinase (EC 2.7.10.2) (CSK homologous kinase) (CHK) (Hematopoietic consensus tyrosine-lacking kinase) (Protein kinase HYL) (Tyrosine-protein kinase CTK)	LOC106573821	-	XM_014149184.1,100,100.000,60,2.54e-24	XM_021603618.1,100,91.667,60,3.86e-16	megakaryocyte-associated tyrosine-protein kinase-like (LOC106573821), transcript variant X4	GGGGGAAGGAAGAAGTAAGCAGTTATCTCGACCTCGATTTCCTTTTTTACGGAATAGCCTGTAATGAATCGCAGCAATTGGTTACCCACTCGAAACGGCAATGACAAACGTAACAGGTCGTACAAATGCAGCGTTATAGGTGTTCTCTTTACTTATGAATTTACATCCACCCAGGCATATTCCAATCTTGAGGATGGCAACGAAGTGTTTGGTGTTCGGCACACAATGTGTTGCCAAGAGTGACCACAGCCAGCCCAAAACTGGTGAACTGGCCTATCGCAAAGGAGACATCCTCACTATTATGAGAACAGGAACGGGGAAAGAACATTACAAGGCCAGACACAACACCACAGGAGAGGAAGGACTCATCTCTGCCACCAACATGCGAGAGCGAGAGGC…
CUST_14260_PI417904088	C208R126	GFI1B	-	-	-	GFI1B	-	XM_014193405.1,100,100.000,60,2.54e-24	XR_002475763.1,98,98.305,59,2.97e-22	Zinc finger protein Gfi-1b (gfi1b), transcript variant X1	AAGTTTAGAATTTCTGGGGCGTCATTCATTGTTCTCACCCGCACTTTATTTGAAGATAAAACACAAAAACTCAGTCACAGATATTTAATTTAAATAGCAACAGCACAGATAATATCAAACAAAGGGTCACAGTTACAACATAGATATATACAATAAGGATCTGGATAATGACAATTCCCCTCACACATATTCTACTCATGACATATATTTGACTTCATGTGTTCCTCCTCTTTAAACTCTGTAGTGCTTATTTCTGTTTTAACATTAGACTAGGTTCAGATTGATGCTCGTCCTATAGCCAGTAATCACACCATTCCATTCTATGAGCCCAGGTTATGACATTGTAGATACAGTGTAATGGATCAGATGCACTGAATAGTATTTCTTCCAACACTTTGA…
CUST_11108_PI417904088	C123R041	RBM38	RBM38	XSEB4R	RNA-binding protein 38 (RNA-binding motif protein 38) (RNA-binding protein XSeb4R)	LOC106582916	RB24B	XM_014166543.1,100,100.000,60,2.54e-24	XM_021609565.1,100,96.667,60,3.84e-21	RNA-binding protein 38-like (LOC106582916), transcript variant X2	tctttttttttTTTTTTTTTTTTTTTTTTTTTTTTTTTTTCCCTTTTAAATACAAATTCTTTATTTTTCCAAGATTTTTTGGGGTTCGGCTTCTTTGAATGGACTGGAAATGACATTTTGCTGAAACAGTCTACAGAGTGTCTGATCCCAGCCAGCAGCAGTGAAACTGGGGCTACAAAAGAGCATCTAGCGTTGTGCATACAGGCAAATCCATTGGTTCTGAGGGAACATGGGAAATACAAATATGGCCATCATCAAATGAACAAGACAAATTGTGGATCTGCACATACACTTACCAAGTTGTAGGACTTCAGTGCAACAAGACCAAGTTACAAAAAAAAGCTACAGAATTTCCTATAAATACCTCAAAACATAAATATTGTAAATGTACTTGATAAT…
CUST_17761_PI417904088	C174R058	BCAM	-	-	-	LOC106577531	-	XM_014155650.1,100,98.333,60,1.18e-22	XM_021591622.1,100,98.333,60,8.25e-23	basal cell adhesion molecule-like (LOC106577531), transcript variant X2	gTGGGTTTTCATTTGTTATAAATTCTACACAGTTCAATAAGAACACACAAGAACACAGTACAGAGCTCAGAACAGAACAGCGTACCACCAAATATACAGTATACCAGGAAGAGAAAAAAGCACTCACATATGTATAACAAGACAAGAATCCTAATTCAAACCTTTCTCTTTTCTCTCAGAACCAGCGGACAAGCCACAGAACAACACAAGCCACAACTCAGTAGTTCTGAAGTACAACAATCCCCCTTTTCTTTAAAGAAAAGAAACCACTTTTTTTTATATCACTTTATATCTTTTTTTTTACAAATAAAACCAAGCGTTCCAAAGTTGAAGATATGCACCTGTTGGTCCCCCCCTAACTTCACAGGAGTCAGAACAGTCATTAAGTTACGGAAATAT…
CUST_5959_PI417904088	C134R116	VCAM1	VCAM1	VCAM-1	Vascular cell adhesion protein 1 (V-CAM 1) (VCAM-1) (CD antigen CD106)	-	-	-	-	0	gggggagtgctgtagataatagaagacagagagagagagaggcggaagaggaggggtcgttggggtgttttccagtaaagAATACTTACGTTCAACGGTCTTCTGCAAAGCAGAAGTGCGAGCGCATTTCTTCTTCAACTCGTCTGACAGAATAGCGGAATACTTCACCGAGGGACGTTCGTTGATAGTTAGATGGAAAATGGAGATTGTAATTGGTCTACTTCTTTCATCATTGTCTCTGTATTGTGACTTCATCGATGCTGAGTGCCTGGTGATCAGTCCTGCCAGGCTGGTGGTGAAGTATGGAGACCCAGCCTCCTCTAACTGCAGCTCAGATACCCCTGTAGAGATGGGCTGGGAAGCCACCCAGGGAGGGACGGGTCTAACAGACAAGGAGGT…
CUST_13997_PI417904088	C145R148	PIM3	PIM3	PIM-3	Serine/threonine-protein kinase pim-3 (EC 2.7.11.1) (qpim)	LOC106584572	-	XM_014170009.1,100,100.000,60,2.54e-24	XM_021598810.1,100,100.000,60,1.77e-24	serine/threonine-protein kinase pim-3-like (LOC106584572)	CGCGAGGAGAATCATCGGGCACATCTCGAAGTGGCCGACTGGTACTTTATTAACGCTCACAATAACACATGTGCGCAGAAGGAAGCATTTTCGGGATTTTGATCTGAAGGAAAGAACAACATATTATTTGTTGGAATACTACTTTTCAACGTTATTCTCCCAGTGAAATTAAAGACTGATCTGCGTTTTATCTTTGGCATTTCGGTGTCCTCGTGCTCAATTGGACATCATTTTCAGAACCTGAATTGGGAGTTTCTTTTTTGGGAACGAGTAATAATGTTACTGTCCAAATTCGGCTCATTTTCCCATATTTGCAGCACGTCCAACATGGATTTGCCAGTGAAAATACAGCTTCAGCAAGTGAAGGTGGAGAAGGAGCCATTCGATAAAATATACCAA…
CUST_7148_PI417904088	C137R043	LSS	-	-	-	LOC106581733	-	XM_014163977.1,100,100.000,60,2.54e-24	-	uncharacterized LOC106581733 (LOC106581733)	cctgacaggaactacatgcaggttttgatttgaaacatcgagatgtggggtcacaatcaaggtaaatgtttgcaaaccaatttcatttgtttgtaccactctttcaatttatagtgtaggtcatttggctcgtattctatataaatctctccttgtatAGGAAACCAGCATCCCTCTGGCTACAACGTGAACCCAAGCGGGTGCGTCCCGCCAATGCCAAGTGGGGGATACCCTGGTGGGTGTCCCACTGGAAACATCCAGCCCCCATTATGCCCTCCCTACCAGCCCCCCTCCACTTGCTACCCTGTGCCACCATCTTATCCAGTACAGGGTCCCCATGGAGGTCATGGGCATGGGCACGATCATGGGCACGGACCTCACGGCCATGATTGTGGAGGG…
CUST_35278_PI417904088	C147R158	-	-	-	-	LOC106574385	-	XM_014150240.1,100,100.000,60,2.54e-24	-	uncharacterized LOC106574385 (LOC106574385), transcript variant X4	ccctgctgttgacagtgtcactctgtctctgtgtgtcaccttctctaggcacaggtgagtactcatggggctactagtggGTAATAAACACACAAGTGTCTTTACTCAAAAGTGGGACAGAGTTAAACCCTAGGTATGGTAGTTGCGTTTAGATTAGATAGTATTCAATGCTTTTAATACCCAGATATACTCAGAAATAACCCCTAATAAACTAGGAAACGTGCACTAGATTAGTCCCATGCACTGCTCTACTTGTCCATTACATTTTTCAGTAAATGTTTATTAGCAGTTACTCTAACCCACCCTTAATAAACTAGCTTGCTTACAAAAACAAAGTAGTTATATGTAGAGCTGCTTTGGAGCTGAGTTATATACTTTTTCCACAAAAACTTCAGGTGC…
CUST_1533_PI417904088	C255R074	FH	FH	-	Fumarate hydratase, mitochondrial (Fumarase) (EC 4.2.1.2)	LOC106611092	-	XM_014210960.1,100,100.000,60,2.54e-24	XM_021595867.1,100,96.667,60,3.84e-21	fumarate hydratase, mitochondrial-like (LOC106611092)	GAGAAACGTCCAGCGATTTAACTGTAACCTCCAGGCGTTACAGAGGAACATTGACAACACAAAGTACAGTCCTGTAGCAGGAGTTATCCTCATATCTTCCAGAATGTCTTCAGAGTACAGAATTGAAGCAGACACCTTTGGAGAGCTGAAGGTGCCAGTTGACAAGTATTATGGGGCTCAGACAGTCCGGTCCACCATGAACTTCAAGATCGGAGGACCGTCAGAGAGAATGCCAATCCAGGTGATCAAAGCCTTCGGGATTCTGAAGAGGGCTGCTGCAGAGGTCAACAAGGACTATGGACTGGACCCGAAGCTGGCTGATGCCATCGTGCAGGCTGCTGATGAGGTGGCAGCTGGTAAGCTGGATGATCACTTCCCTCTGGTGGTGTGGCAGACCGG…
CUST_12513_PI417904088	C224R127	DIAPH1	DIAPH1	DIAP1	Protein diaphanous homolog 1 (Diaphanous-related formin-1) (DRF1) (mDIA1)	LOC106611856	-	XM_014212458.1,100,100.000,60,2.54e-24	XM_021583183.1,100,98.333,60,8.25e-23	protein diaphanous homolog 1-like (LOC106611856)	CAACGCAGAGGGTGATGAGACTGGTATCATGGATGACCTGATGGAGGCGCTGCAGTCTGGTGCTGCCTTCAGGAGGAAGAGAGGACCACGACAAGCTGCCAACCGGAGAGCTGGTCATGCAGTGACGAACATCTTGGCCAAAGAGTTGATGCAGGAGGACACCGCGCCCCGCTTCAGCAAACCACCCAATAAGAAGACCAAGATAGTGCAGAAGGAGGAGCCTAGCATAGAGGGGGCGGGGTCACTAGAGGACCTCTTAGAGGACAGTCTATCACGGTCCAATTAAGGAGATGGGAAGAAGTTTGCCCTTAGCCACAGATCTAGGATCAGCTCGTCTTACCCATATCCTAACCTTAACCATAGAGAAATATAGAAACTGTCCTTCAATCAGTGTCTAAG…
CUST_12531_PI417904088	C050R018	VCP	VCP	CDC48	Transitional endoplasmic reticulum ATPase (TER ATPase) (EC 3.6.4.6) (Protein CDC48) (Valosin-containing protein) (VCP)	LOC106569430	-	XM_014140785.1,100,100.000,60,2.54e-24	NM_001124510.1,100,100.000,60,1.55e-26=XM_021601254.1,100,100.000,60,1.77e-24	transitional endoplasmic reticulum ATPase-like (LOC106569430)	agagttaggtgttggtgttgcactcactgaagagaaacacacgagaagaggaagaaatcaggttttatttgttggacataCCAAGCGGAGCACCATGGCTTCAGGAGGAGAATCGAAAAATGATGATCTATCCACAGCGATTTTAAAGCAAAAGACCAGGCCTAACCGGTTGGTTGTGGATGAATCTCTCAATGAGGACAACAGTGTGGTCTCGCTGTCTCAGGCCAAGATGGACGAGTTGCAGCTGTTCAGGGGAGACACAGTGCTGATGAAAGGAAAGAAGAGACGGGAGACGGTCTGCATCGTGCTCTCTGATGACACCTGCTCCGACGAGAAGGTCCGCATGAACAGAGTGGTCCGCAACAACCTAAGAGTCCGCCTGGGAGATGTTATCAGTAT…
CUST_4654_PI417904088	C135R160	SACS	-	-	-	SGCG	-	XM_014162868.1,100,100.000,60,2.54e-24	XM_021588194.1,97,100.000,58,2.29e-23	sacsin-like (LOC106581114), transcript variant X2	ggggatttatgcatttactgtgtgaaatggttttatattggagtttagagtatagtcagtcaaactaatcagtattataaGTAATAACTTTGTAATAATGGGAAATTAAAGGGACAGTGCAACATTTTGGCAACTTTTTCTACTTACCCAGTCAGATGCACTCATGGATACCATTTGTATGTCTCTGCTGCAGTTTGAAGGAAGTTGAAGGTACTTTCTGGAGCCATTGCTAACTAGTGCAATGACTGGAAGTGTACAGGAACAGCAAGCATGCATTTTCAACACTCTCTGAAATGTTCTATATTTTGTTTATCATTACATCATTGTGTTTCGATCTCCTGTCTTGGTATAGGCTCTGAAATGAAATAGGCTATGTCGCACTCCTAATACTATTGTATT…
CUST_36955_PI417904088	C029R096	SPPL2A	SPPL2A	IMP3 PSL2	Signal peptide peptidase-like 2A (SPP-like 2A) (SPPL2a) (EC 3.4.23.-) (Intramembrane protease 3) (IMP-3) (Presenilin-like protein 2)	PSL2	-	NM_001173826.1,100,96.667,60,1.12e-22=XM_014127419.1,100,98.333,60,1.18e-22	XM_021607799.1,100,100.000,60,1.77e-24	Signal peptide peptidase-like 2A (psl2)	TATTGAAACTAGTGGTGTGCCAAATCACAGATTATAGTTTTTTCTTGTGAATACGATTTTTACTCAATTCCGTATGTTACCGACATGGCAAAAACTCCGTGGATTATTATTTTATCAGTCATTCTCCGGTCATCTCAGGTGATCTGTCAAGAGGCAATCTTGCACATCTCAAATGGAGCCACAGATAAAGAATACTGCCTGGTCTACAACTCCCTATGGACCAACCTGTCACTCTCACTCAGCGCTGCTACTGCGTATCCCCTGGTGAACTTGTCGTCCAGGCTACTGTGTAGCTCTGCAGGGGTGAGCCCAGCCATAGTGAGAGGCAAGGCGGTGGTGGTCATGAGAGGGGGGTGTAACTTCAGCCAGAAGGCTGAGATAGCCCAAGACCTGGGGGCT…
CUST_30347_PI417904088	C130R165	UGT2A2	UGT2B10	-	UDP-glucuronosyltransferase 2B10 (UDPGT 2B10) (EC 2.4.1.17)	LOC106608682	-	XM_014206780.1,100,100.000,60,2.54e-24	XM_021578192.1,97,96.552,58,4.96e-20	UDP-glucuronosyltransferase 2A1-like (LOC106608682)	GAGGTGAAATAAAACATTTATTTTTCACGAAGTTACACTACCAAACAAGGTACTAATTTGGTGGAATGACCCTTTAACATGATTTCAAGGGGTCACTCTGTCTTCTGTCTTGATTTAGTTTTCTTGCAGCACTTGCGGAAGCAGAAAATGCATGTTTTAATGGATACAACTATGACAAGTGCCACTATGGTGAGCAGAGCAGCTGCCACATCTAGACAGTGGTACTGGTACCAGCTCAAGTTATGGGCCTCCACCCTCAAGTGCTTAGCCCCTTTGTTACGCATCACAAATTCGATCCAGAACACAGCTGTATCCAAGGGTTTCATTGGTTGGTCGTGGTGGATTCTTGACAGCCTCATCATGCTTGCTTTATACGATGGATCATTGATCACACTGTTG…
CUST_22712_PI417904088	C012R015	-	CD274	B7H1 PDCD1L1 PDCD1LG1 PDL1	Programmed cell death 1 ligand 1 (PD-L1) (PDCD1 ligand 1) (Programmed death ligand 1) (hPD-L1) (B7 homolog 1) (B7-H1) (CD antigen CD274)	-	-	-	-	0	GGGGGAAAGAACAAGCAAGACTTCAGCAAAGGTCAAATGGAGCAGACTTTTCTCTTGGTTTTACATGTAGTCTTATGGCCAACTCTTGCAGCCTTGTTCACAGTGGAGGTGGACAGTCTCTCACATGTGGCAGAGTTCTACGGTGATGTCACCATGGGCTGCAGGTTCCAACCTGGGAGCTGGGACCCGAACCTGTCAGTGATATGGCAACGGGTCCAGCCTCTTCCAGATGTAGAGGTGTACAGGCTGGATAACGGACAGGAGAACCTCACTTCTCAGAATTTCCAGTACCGCGGCAGGGCACGGTTGGTGTCGGAGGAGCTGACCAATGGCTGGGCCAAGCTACATGTGTCCAGGCTGAGGATCAACGACTCTGGGGTGTACAGATGTCTTGTGGAA…
CUST_33686_PI417904088	C101R018	GPR156	TRIM39	RNF23 TFP	E3 ubiquitin-protein ligase TRIM39 (EC 2.3.2.27) (RING finger protein 23) (RING-type E3 ubiquitin transferase TRIM39) (Testis-abundant finger protein) (Tripartite motif-containing protein 39)	GPR156	-	XM_014164872.1,92,100.000,55,1.53e-21	XM_021579315.1,92,100.000,55,1.07e-21	G protein-coupled receptor 156 (gpr156), transcript variant X2	CCAATCTCACTCTTTCTGAAGATGTGAAACAACTTAGACATCCCGGTAGACGACAAAACTACCCTGGCAATCCAAAGAGGTTCTTCTATGTTGCCAGCATCCTGGGAAAGGAGGGCTTCTCCTCAGGAAGATTCTACTACGAGGTGCAGGTGAAGGGAAATACTCTCTGGAGTGTAGGAGTGGCCAGAGAGTCCATTAAAAGAACGATTCATACAGCAAAGCCTGAGAATGGACTCTGGACTATCCAGCTGGGGAAAGGGAACGTTTACAGGGCCTGCACCACTGACCCTACCACCCTCTCCCTGAGTGAGAAGCCCCAGAAGGTGGGGGTTTATGTGGACTATGAAGATGGTGAGGTTTCCTTTTACAATGCCCAGGCCAGGTTTCATATTTACTCGT…
CUST_34575_PI417904088	C162R170	DPYSL2	DPYSL2	-	Dihydropyrimidinase-related protein 2 (DRP-2) (Collapsin response mediator protein CRMP-62)	LOC106585556	-	XM_014171906.1,100,100.000,60,2.54e-24	XM_021605900.1,100,98.333,60,8.25e-23	dihydropyrimidinase-related protein 2-like (LOC106585556)	CAGCAACCTTTCGGTTACTGGCTCAGCAGTCCTAACTGCTAGGCTACCCGTCCGTTTTAAGGTACACTAAATGTCAAATCGCACATAAATCATTCCCCTTGTAAATCAGTCCTGCTTTGGAGACAGGGCACAAGCCCTCTGACCTGGTTTTTTGCTGTGTTCTGTGGTACTCTAGGTGCTGTGGTGTATGGAGAGCCTATCTCTGCCAGCCTGGGCACGGACGGAACCCACTACTGGAGTAAGAACTGGGCCAAGGCAGCTGCCTTCGTCACCTCCCCACCCCTCAGCCCTGACCCCACCACCCCTGACTATCTCAACTCACTGCTCTCCTGTGGTGACCTGCAGGTGACTGGTAGTGCTCATTGCACGTTCCACACCTCCCAGCGTGCTGTGGGCAAA…
CUST_25240_PI417904088	C231R139	COL12A1	-	-	Transposable element Tcb1 transposase (Transposable element Barney transposase)	LOC106610773	-	XM_014210333.1,100,95.000,60,2.56e-19	XM_021559441.1,100,95.000,60,1.79e-19	collagen alpha-1[XII] chain-like (LOC106610773), transcript variant X2	accaTTCCTaTtTatAaaaCTGTTTCAGTTCAGCAATATTCTTGGGATGTCTGGTGTGAACCACTCTCTTGAGGTCATGCCACAGCATCTCAGTCGGGTTGAGGTCAGGACTCTGACTGGGCCACTCCAGAAGGTGTATTTTCTTCCGTGGAAGCCATTCTGTTGTTGATTTACTTCTTTGTTTTGAGTTGTTGTCCTGTTGCATCACCTAACTTTTGTTGAGCTTCAATTGGCAGATAGCCTTACATTCTCCTGCAAAATGTCTTGATAAACTTGGGAATTAATTGTTCCGTCAATGATAGCAAACTCTCCAGGCCCTGAGGCTGCATAGCAGCTCCACACCATGATGCTCCCTCCACCATACTTTACACTGGGGATGAGGTTTTGATGTTGGTGTCC…
CUST_7708_PI417904088	C119R070	EFR3A	-	-	-	EFR3A	-	XM_014139103.1,100,100.000,60,2.54e-24	XM_021612602.1,100,96.667,60,3.84e-21	EFR3 homolog A (efr3a), transcript variant X3	aTCATtgactgaGATTGAGtgCCAGtctgttttttgCtATCATTccgAATTCCCTGTCACTCATTGGCTTGACAATGACTCCAATGGAGTAGACAAGAGCACAAACAGGTCtGGGACTAGGCTATCATTTACTTTCTTTATGCTGAATTTGTCAATAGTCTACTATGGTATGTTTTTTTATAGATATTCATCGTACGAGTGGCATGTTGCCTGATAGAAAATGGTTTGGGAGCTATAGTTCTTCTGTTT*ATTGTTCAAAATCAGCACTCCTCATAACTTAAAACGGTGCAATGGGAGACCACTGTTTGGGCTAAACCA*GCCTTTCTGAAGTCTGATGTATTCTTGGTGTTTTGAGACGACCCCATGTGTGCTTGTTTTCCTTCCAACATATCTACGA…
CUST_40999_PI417904088	C089R160	NUP54	NUP54	-	Nucleoporin p54 (54 kDa nucleoporin)	NUP54	-	NM_001140250.1,100,98.333,60,2.41e-24=XM_014123267.1,100,98.333,60,1.18e-22	XM_021603203.1,100,98.333,60,8.25e-23	nucleoporin 54 (nup54)	tcgatGGCGTTCAACTTTGGCGGTGCTGCCACCAACCCAGCAACAGGTCTTGCAGTCCCTGGTTTCGGGACCACCACCACTGCTGCGGCCCCCGCTGGCTTCGGCGGCTTCGGCACCACCACCACAGGTGCTTTTGGGGGTTTTGGGACATTCACTACATCCGCTGCTGCGCCTGGGTCAACTTTCAGCTTCGCCGCTCCTGCAAGCACAACAGGAGGACTGTTTGGTAATACCCAGAATAAGGGATTTGGGTTCTCCTCTGGGCTGGGCACTGGCACTACTGCTGCAGCTGGGTTTGGAACAGGTCTGGGGACAACTCTAGGAGGTGGATTTGGTGGCTTCAATATCCAGCCACAGCAGCAACAGCAAGGAAGCTTTTTTGGGCAGCAGGCCCAGGCC…
CUST_16018_PI417904088	C102R006	CKLF7	CMTM7	CKLFSF7	CKLF-like MARVEL transmembrane domain-containing protein 7 (Chemokine-like factor superfamily member 7)	CKLF7	-	NM_001141549.2,100,100.000,60,5.18e-26=XM_014202213.1,100,100.000,60,2.54e-24	XM_021617848.1,100,96.667,60,3.84e-21	CKLF-like MARVEL transmembrane domain-containing protein 7 (cklf7)	GCTGTTGAGTTTCCCTTTTACTTCAGTCAAACAAAAGCATGTTTGAAATATAAACCCATATACAAACTCAAACACATCAGATAAAGAAGAGATGTTTAAATACACGTGATAGTGTGAGGCTGTATAAAGGTTGACATTTTTTATGATTATATTCTTCTCATAAGCAGCCTATAATACCGTGACAGACATACAGTAGTAAGCGTGAACATAAAAGCACAAAACTTTATCATCATAAAAATTTGCTCTCAAATAAATAATGTAAACAGGGGTGGCATTGACATATCTAACTCTAAAAAGCTTCTGGGCAACACTGAAAAACAGCTTATGTCCTCTTGATTTCAAAGCATTCAAATAGCGACCATTCAAGATGGAGGGGTGGTTTGGTCTGGCTCTCAGCCT…
CUST_25002_PI417904088	C022R103	USP18	USP18	UBP43	Ubl carboxyl-terminal hydrolase 18 (EC 3.4.19.-) (43 kDa ISG15-specific protease) (ISG15-specific-processing protease) (Ubl thioesterase 18)	LOC106609458	-	XM_014208322.1,100,100.000,60,2.54e-24	XM_021577231.1,100,93.333,60,8.31e-18	ubl carboxyl-terminal hydrolase 18-like (LOC106609458), transcript variant X7	caggtgctacctggaaaaattacagtttatttCTCTGTTGACAGTAGTGATATCGAAACAGAACAGAGTACCGGTAACTACTGCATAAACCAATTGTTCTGAAACAAGGTGAGTCACATATTTTCCATGTCAGGCAAATATTATCACCAATGAGTCAATGGCCTTCTTCAGGTTTTCCCCCAGAATACCTCAACTCAGCACACTCTTCAAACCACCCGTCTTATAGTGGTTTCAGAACGTGTGGTCTCTGAAGCTTACAAGATGACTGTACTAATGACAGGGTGAAGGGTGTTTGCCTCCACCTATTGGCTAAGCTCAGTAATGCCCTATGAATGTCCAACGTATCCAGCATAAACAAAACCTCAAAACATATACACACCCCACCAAATATACTTAAAC…
CUST_23416_PI417904088	C224R086	RNF213	RNF213A	-	E3 ubiquitin-protein ligase rnf213-alpha (EC 2.3.2.27) (EC 3.6.4.-) (Mysterin-A) (Mysterin-alpha) (RING finger protein 213-A) (RING finger protein 213-alpha) (RING-type E3 ubiquitin transferase rnf213-alpha)	LOC106606438	-	XM_014202647.1,100,100.000,60,2.54e-24	-	E3 ubiquitin-protein ligase RNF213-like (LOC106606438), transcript variant X4	GAGAGGCAAACAATTTATTTTGTTTTAACATAATAATCACTGCATGTCACGCTCTTCAGCAATGAAATGGAACACAGAAACAACATTTGGTCCAACTTTAAGTTCAACAAGAAGAACTTAAACTGCAAAATACAATGAGCATGGTTTATTCTGTAAGGCAGTGATTCTGAAAGTGGAAACTGTTATGCCATTTTTGACTAGATGATTGAAGATGAGTCCGTTATGAAATAACAAAACATATCACTTGAGGCAAAGCCATGTAAATAGAATTCTACAGTGGCCCCAAATGAACAAAGTGAATTTTAAAACCTACTTTTCCATTGGGGACACCGTAGATATTAATAACAAGGCAGCTTCAGAAATGTGCAAACTTATTTCCCCCATTAGAAAACATCACCT…
CUST_26956_PI417904088	C217R077	TSKU	TSKU	LRCC54 TSK	Tsukushin (Tsukushi) (Leucine-rich repeat-containing protein 54) (Z-TSK)	LOC106612955	-	XM_014214670.1,100,100.000,60,2.54e-24	XM_021582854.1,100,96.667,60,3.84e-21	tsukushin-like (LOC106612955), transcript variant X1	ttggtgggactaatAAAAATGGGAGCGGAAGTTGAGTCTCATGCAGGATTCCTTGGCGCTGTGAAGTAAACTGGATTGTCCAGGCGAGCCAACTATCTAAATTCCTATTTGATGGTCAAGAGCATGATGGCGTTTCTCCTGTATGTTAGCCTGTGGATGCTCCTGGCTGTCCATGGCCAGGCTGGAGCCGTGAAGAACTGCCACCCGGGTTGCCACTGTGAGGTGGAGAGCTTCGGCCTGTTCGACAGCTTCAGCTTGACCAGGGTGGACTGCAGGGGAGTGGGCCCTAGCATCAACCCCATCTCCATCCCCCTGGACACTGCCCACCTGGACCTGTCCTCCAACTCCATGTCCCTGCTGACCGACACCATGCTCTCTGGGCCTGGCTATACCACCTTG…
CUST_15445_PI417904088	C145R033	LRRFIP2	LRRFIP2	-	Leucine-rich repeat flightless-interacting protein 2 (LRR FLII-interacting protein 2) (xLRRFIP2)	LRRFIP2	-	XM_014154296.1,100,100.000,60,2.54e-24	XM_021606780.1,100,100.000,60,1.77e-24	leucine rich repeat [in FLII] interacting protein 2 (lrrfip2), transcript variant X1	ggtgcgagatgcggagggaaactgaggacaagtctaaggaactagaaagacaaaagcacacatgcacagtcctgcagcacAAACAAGTGGAGTTAAAAGAGGGAATCCGCCAGAGAGATGAACTCATAGAGAAGAACCAGCGAATCCAGACTAACTTAGATACCCTCACCAGAGAGGTGTTTGACCTGCAGGAAACGATAAACTGGAAGGACAAAAAGATTGGGGCCTTAGAGAGGCAGAAAGAGTACTTTGATTGCATTAGGAATGAGAGGGATGAGCTCAGAGATGAGCTGGCTGACATCAAGGCGAAGGCCAAAACAGGAGAGAAACACGGCCTGGTCATCATCCCTGAGGGAATGCCTAACGGGGACATCAGCCACGACGACCCAGCCACAGGGA…
CUST_32164_PI417904088	C101R157	TJP1A	TJP1	ZO1	Tight junction protein ZO-1 (Tight junction protein 1) (Zona occludens protein 1) (Zonula occludens protein 1)	-	-	-	-	0	TCACCACCACCATTAACATGAATAATATGAATGACGGGTGGTACGGTGCCCTGAAGGAGACCATTCAACAGCAGCAGAACCAGCTGGTGTGGGTTTCAGAGGGAAAGGCGGACGGTGCTCCAGATGATGACCTGGATCTGCATGATGACCGTCTGTCGTACCTGTCGGCTCCGGGCAGTGAGTACTCCATGTACAGCACGGACAGCCGCCACACCTCCGACTACGAGGACACGGACACAGAGGGCGGGGCCTACACCGACCAGGAACTAGACGAGACGCTGAACGACGAGGTGGGCCTACCCACTGAGCCCGCCATCACCCGCTCCTCGGAGCCCGTCCGAGAGGACCCGCCAGTAATCCAGGAGCCCCTGGGGTACGGCGGGTACCAGCACACAGTGC…
CUST_5851_PI417904088	C101R050	C25HA	CH25H	-	Cholesterol 25-hydroxylase-like protein (EC 1.14.99.38)	C25HA	-	NM_001140862.1,100,100.000,60,5.18e-26=XM_014178944.1,100,100.000,60,2.54e-24	XM_021575763.1,97,100.000,58,2.29e-23	Cholesterol 25-hydroxylase-like protein A (c25ha)	cggggaaaacacgaatgTCAAGCTCACACACAACAAGACTGAACACAATGTTTCTACCGAGCCTATGGGACTTCATACTGGGATATAATGCGTGGCTCAGATCACCTTTCTTCCCTGTGCTTTTCTCCCTCAGTGTCTACCTCACCTTCTGCCTGCCCTTCGTGGTGCTGGACCTCCTCTCCCCCAGGCTGGCCTGGATCAGGACCTTTAAGATCCAGCAGAAGAGCCATGTCTCCTGGACCATGATGTGGAGCTGCCTGGCTCTCTCCCTCTACAACCATGTAGTGTCCCTCTTCCCTCTCACTGTGCTGCACTGGTTCTGGAGACCAGCCAGCTTCATAGCCGAGGCCCCCGGAACGCTGCGTCTCATCTGGGACGTGGTCGCCTGCCTACTCCTGT…
CUST_16520_PI417904088	C144R102	CTSB	CTSB	-	Cathepsin B (EC 3.4.22.1) (Cathepsin B1) [Cleaved into: Cathepsin B light chain; Cathepsin B heavy chain]	LOC106611360	CATB	XM_014211515.1,100,100.000,60,2.54e-24	XM_021573722.1,100,96.667,60,3.84e-21	cathepsin B-like (LOC106611360)	acaaatgctaactttattactgtgtaggtagtgatcacatggtttcttggtctaccaacagcctggttgtacctggtttgTTAAAACAGGTCATGTCCACTCACTTTTGTTGCTGCTCTAAGAGTCACTCGGCGGAGGGATTCCTACACAAACATACCTTCTAAATGTCACCGCACAGTTAAGTGAAAGTAGTGGGGTGTGAGGTTTTAGGCTGGTATCTGTATAAGCACTTTGGTGACGACTGCATGTCTTGCAGGGCAGGGAGAACAGGAGTTTAAGCCACTCCAATTGAGACCAAGTTAAACATATTGG*TTGATTTTTAATTAATGCAACTCAATCATTCCAGAACACTTGATCAAAACAGAGAAGCATTAAAGACACCGCATTCAACAAAAAAC…
CUST_26686_PI417904088	C255R080	IDH3G	IDH3G	-	Isocitrate dehydrogenase [NAD] subunit gamma 1, mitochondrial (Isocitric dehydrogenase subunit gamma) (NAD(+)-specific ICDH subunit gamma)	LOC106567023	-	XM_014135799.1,100,98.333,60,1.18e-22	XM_021565832.1,100,98.333,60,8.25e-23	isocitrate dehydrogenase [NAD] subunit gamma, mitochondrial-like (LOC106567023), transcript variant X2	gctctgtgtgggcacgagcaaatgtgcgtgcacgctgtcagtcaggttgcatcaagatggccgcctccagtgcagtgCTTTCAATGTCCAAAATCATCAAACCCATTTGGGGTGGACGGTTGGCAACGACGGCAAAAGTTTTTGGAGCCCCAGTGAGCAGTCGCAGAGAGAAGTCAACAGTACCCCCTCCTGCAAAGTATGGTGGCAGACACACTGTAACTCTCATACCTGGAGATGGTATTGGACcagaACTTCTCAATCACGTCAGGgAACTCTTCAGGTTCAGCTGTGTGCCTGTGGACTTTGAGgtagtgAACGTCTgctcAgatACTGAGGATGACATCAACAACGCCATCACTGCCATCCGccgtaatggaGtggccctctaatgtAACATTG…
CUST_23106_PI417904088	C098R135	RTN2A	-	-	-	-	-	-	-	0	GAAATGAAAAGAACAAATTGT*GGTTTTAATAGCTCTCAGGTAACAGGTTCAGATCAGCAAGCTGCATATCAACTCACACATACTGTGTACACACACACACTTACACACTCGTCATGAGCACAAAAGTGCCATCATTCCCTCACACACACATACACACTCTACCACACACACATCCTGATTCCAAGTGTTAGGCTGCCATTAATAATGATGAACTCTAGTTAGGTGAACTCTAACCTCTGACCCGGGACTGACCCTGTCCTAGCTCCTGGTGAACTCCAGTCCCGCTGGACTCTATTCTGAAGTTTTTACTTCCCTCTGTTCAGATATACAGCTGTCAATAAGGAACACACAGGTCTCCTAGTGTTCGAGGTTCCAATCAGTCTTATTACTTTACTGGA…
CUST_27640_PI417904088	C112R040	DOCK9	-	-	Transposable element Tcb1 transposase (Transposable element Barney transposase)	-	-	-	-	0	gcacgaggGTGAACCATGCCTTGAACAAAAGAGATCTCAGAAGACCTAAGATTAAGAATTGTTGACTGGAAAGGGTTACAAAAGTATCTCTAAAAGCCTTGATGTTCATCAGTCCATGGTAAGACAAATTGTCTATAAATGGAGAAAGTTCAGCGCTGTTGCTACTCTCCCTAGGAGTGGACGTCCTGCAAAGATGACTGCTAGAGCACAGTGCAGAATGCTCAATAAGGTTAAGAAGAATACTAGAGTGTCTGCTAAAAACGTACAGAAATCTCTGGAACATGCTAACATCTCTGTTGATGAGTCTACGATACGTAAAACAGTAAACAATAATGGTGTTCATGGGAGGACACCACGGGAGAAGCCACTGCTGTCCAAAAAAAACATCACTGCACGTCT…
CUST_27460_PI417904088	C160R127	HEXB	HEXB	-	Beta-hexosaminidase subunit beta (EC 3.2.1.52) (Beta-N-acetylhexosaminidase subunit beta) (Hexosaminidase subunit B) (N-acetyl-beta-glucosaminidase subunit beta)	LOC106568911	-	XM_014139744.1,100,100.000,60,2.54e-24	XR_002473438.1,100,98.333,60,8.25e-23	beta-hexosaminidase subunit beta-like (LOC106568911), transcript variant X3	cTGAGCCGTACCTTCCCCCAGCTGAGTCAACATGGAGCATACCAGCCGTACACACATGTGTACACGCCTTCTGATGTGAAGATGATCATCGAGTTTGCTCGCCTAAGGGGCATTCGGGTTGTCCCCGAGTTTGACACCCCTGGGCACACTCAGTCATGGGGCAAAGGGCAGAAGGACCTGCTGACCCCCTGTTACTCTGGAGCCAGCCCCTCTGGTTCGTTCGGACCGGTCAACCCCATGCTCAACACAACCTATGACTTTATGAGCATGTTCTTCAAGGAAGTCAGCACAGTGTTCCCTGATGCCTACGTCCATCTGGGAGGAGACGAGGTCAACTTCAGCTGCTGGAAGTCCAACCCTGACATCCAGAAGTTCATGGAGCAGCAAGGCTTTGGGATG…
7_3_3_14	C147R101	PEPE	AAD-A	-	Alpha-aspartyl dipeptidase (EC 3.4.13.21) (Asp-specific dipeptidase) (Dipeptidase E)	PEPE	-	NM_001141091.1,100,100.000,60,5.18e-26=XM_014174656.1,100,100.000,60,2.54e-24	XM_021598651.1,100,98.333,60,8.25e-23	Alpha-aspartyl dipeptidase (pepe)	gggggatgcacggccggctatgtACTGCTAAAGTAATCTTTGAGGTGTAGGATGAGGTAGCCTATTTAACCCTGAGTGAGTTGTAAACTTTGATCAAAACCTTGTCTTGAAAGATATGAAGAGGAGACTTCTGCTCGTGTCCAACTCAACCCTGCACGGGGGTGGATATCTGGAACATTGTCAACAGCAGATCAAAGACTTTTTCGGAAAAGGTGTGGCGAGGATCTTATTCATCCCCTATGCACTGTGTGATAGAGATGGCTACGCAAAGACTGCCAGGGACAAGTTCAACAGTTTGGGTTATGAGGTGGACAGCATACACGAGGCCTCTGACCCAGTGGAAGCTGTAAGGAAGGCTGAGGGTATATTTATAGGCGGTGGCAACACATTCCGTCTGCT…
CUST_7418_PI417904088	C188R058	BSCL2	BSCL2	-	Seipin (Bernardinelli-Seip congenital lipodystrophy type 2 protein homolog)	LOC106604395	-	XM_014198973.1,100,100.000,60,2.54e-24	XM_021561649.1,100,98.333,60,8.25e-23	seipin-like (LOC106604395), transcript variant X2	TTGGGAGAAGGGGGACAACTTTTACTGCTCGTTATCAAATAAGTTATTGAAACAATAACACCATTTTATTTTATCTCTGCACCAATATCCGAGGTCATTGAGACATTTGGAGCTTGACCAGAGAAATTCTATCAAGCATCAGAATAGATCATCCACACTCCAGAGATGGACACAGGAACTGAACCTATGGGCACCGGAGGTCATCATGAGTCAGGTGATCCAGTTGGACCGGCGCTGCTCTGGCTCTGGGACACTGTTACCATGGTAACACTGCAGGCGCGTCAGAGGGTGTTACAGGGAGCGTTGTTACTGTGTGCTCTGGGACTGTTACTATGGACCGCCATCTTCCTCTACGGGAGCTTCTACTACTCCTACATGCCCCTAGCCACCTACAGCACA…
CUST_10776_PI417904088	C242R124	-	-	-	-	LOC106574291	-	XR_001321513.1,100,100.000,60,2.54e-24	XR_002471167.1,100,98.333,60,8.25e-23	uncharacterized LOC106574291 (LOC106574291), transcript variant X2	aactaacaggagatgtctctgttggtcctgggcagggaagatgaggtcgaacacctgagagtttatttctcccctgaggcATACCAAACAAATGAGGTGGAGCTCTCCAAACCCAGAATCCACCTTTAACGGAACAATGGCTTTTGTTTGCGTGCAAATAACACACTGCGTAATCCTCATGTTGGGTGTATCTGATATGTTTGTAATAGGAGATGTTGAGGAGCACAATGTGACATGGAGTGTAGTTCAGTGAAAGACATGATGGGATATGAGGTATGATATAGATAGCTTTTAGTTTCAGGGCTGACCAGGATTTTGATCATAGTATTTCACTCTCTTCCATTTTCCACAGCAAACAAAGAGGACTATGAGGAGGAATATGATGACTATTCTACACAA…
CUST_3218_PI417904088	C175R087	TRIM25	TRIM16	EBBP	Tripartite motif-containing protein 16 (EC 2.3.2.27) (E3 ubiquitin-protein ligase TRIM16) (Estrogen-responsive B box protein)	LOC106561186	-	XM_014124865.1,100,100.000,60,2.54e-24	XM_021571647.1,95,100.000,57,8.25e-23	E3 ubiquitin/ISG15 ligase TRIM25-like (LOC106561186), transcript variant X3	gggggctACTCCTCAGCACAATTGGAAACGAAACTCATCTCTTCAGCTCAGCCTGCTTGCGTTTCAAAATGGCAGAAGCCATGGACTCAATCAGTTGTTTAATCTGTTTGGAGACACTGAAGGATCCAGTGACTATTCCCTGTGGACACAGCTACTGTATGGACTGCATTAAACGCTTCTGGGATCAGAAGCTTGTCTGCAGCTGCCCCCTGTGCAGACAGATCTTCACTCCAAGGCCTGTTCTGAACAAAAACACTGTCATTGTAGAATTGGTGGAAACACTGGCAGAAATAAATACGAAGAAGATGCAGGAGGTGAGACTTAAGTACCGTGCACAGGCAGCAGTGGACAGTGAAGGGCTGTCAAAGATGAAGGTTGTTTCACCTTCTGAACCCAATA…
11_3_9_13	C047R105	VATH	ATP6V1H	-	V-type proton ATPase subunit H (V-ATPase subunit H) (V-ATPase 50/57 kDa subunits) (Vacuolar proton pump subunit H) (Vacuolar proton pump subunit SFD)	VATH	-	NM_001140003.1,100,100.000,60,5.18e-26=XM_014187323.1,100,100.000,60,2.54e-24	XM_021590162.1,100,100.000,60,1.77e-24	Vacuolar proton pump subunit H (vath)	tcttttttttttttttttttttttttttaccagtccttCTAGATTACACTTTATTGGAATGCATACTCATAACGTTTTAACAACACATAAGTAACTTTATCAATTTTACATTTATCACAACATCAAGTACTACTCAAATCACTGACATCACTTAGCTGTGAGGTCACTTCACATAATATCATTAATAAACCACAAGCAGGAAATCAAGCTACAGTCAGTAGAGAGGAGACCAGAGGAGAGGAGACCAGAGGAGAGGAGACCAGAGGAGAGGAGAGAGAACAGAGGAGACGAGAGAGACCAGAGAGGAGGAGACCAGAGGAGACAACAGAAGGGTAGAGAACAGAGGAGACGAGAGGAGAAGAGAGAGACCAGAGGAGAAGAGAGAGACCAGAGAAAAGG…
CUST_3247_PI417904088	C248R051	RIMS2	RIMS2	KIAA0751 RAB3IP3 RIM2	Regulating synaptic membrane exocytosis protein 2 (Rab-3-interacting molecule 2) (RIM 2) (Rab-3-interacting protein 3)	LOC106605391	-	XM_014200972.1,100,100.000,60,2.54e-24	XM_021556767.1,100,100.000,60,1.77e-24	regulating synaptic membrane exocytosis protein 2-like (LOC106605391), transcript variant X30	TCTACGCAGCACaggggaGACAACACAAAGAGCTACATCAGAGAGCCATTCTGCTACTACAGCACCATAGTCTGCTCTTGGGCTTCAGCGTTCAACCAGTACTTCAGTTATACTCTCGGTGCACGGTAGAGCTGTCTGGAGACCTGTAACCTCCGCTAGAAGGCGACTTGACTCAGGTGATCAGTAGGTGATCAGTGACCATGGGTAGGCAGGGGCATGATGCCACTGCAGCGGCTGGCGCCCCGGGGTCCGGGATGCGCATGCAGCGTTCCCAGAGCAAGATGAGCCTGTCTGCGTCGTTCGAGGCGCTGGCCAACTACTTCCCCTGCATGAACTCCTTTGACGAGGAGGACGGAGAAGCCGGTGGGAAGAAGCTTCGTAGCACCGTACAGCGGAGCA…
CUST_19154_PI417904088	C150R069	NELFD	TH1L	NELFCD-NELFD TH1L	Negative elongation factor D (NELF-D) (TH1-like protein)	LOC106583261	CATZ	XM_014167213.1,100,100.000,60,2.54e-24	XR_002474222.1,100,100.000,60,1.77e-24	cathepsin Z-like (LOC106583261), transcript variant X2	ttggcagatatctgattactagcaagttagcttaggcaaaggctatctaaTTGTTTTGAAAACACACTCTGTATTGTTTTCTAAAGTATTAGCTAGGCCTGCTTTATTATAACTCGCCGTGTGCTTCACATTATAAACCCTACTCATTCTCTCGTCATCATGGACGAGGAATATTACGAGAGGAATATTGGAGACTGGGATGGTCCGGATGGCAATCAGGACGACTATGTTGAAGGGGAGAATGATGGGAAAGTTCAGGAGGACTGCCTACAGAAGTTCTCCAGCAGAGATTACATCATGGAGCCTGCTGTATTCAACACCCTTAAAACATATTTTCAGGCTGGTGGCTCCCCTGAACACGTCATCCAGCTCCTGTCTGAGAACTACTCTGCTGTGGCC…
CUST_22547_PI417904088	C070R022	CGNL1	CGNL1	JACOP KIAA1749	Cingulin-like protein 1 (Junction-associated coiled-coil protein) (Paracingulin)	CGNL1	-	XM_014175603.1,100,98.333,60,1.18e-22	XM_021586228.1,100,98.333,60,2.97e-22	cingulin-like protein 1 (LOC106587322)	aGAGATTAACTAAGGATAACTTTATTTCATTTTAGCAGGGTTTTTAGTCTCAGCAAAGTACAGATGTGTACATACAGAGAGGTAGCGGCAGTATTTCTTCTCAACCCCCCCCCACTCCAAAACGACTGGAGGAGGCACACAGCCAAAGGCCTCTTCTTCATTTCATACGGCAACAGCCTTGGACGCCTTCAGAAATAATCCCTCAGACAGTGCAAATCATCACAGTGTAGCTAAACAGATCGATTGCCAATACAGCTCATCTGTAGAAATTCCCTCGTCATATAAACTTGCATAACAGATAATATATAGGCACAACAGATGCTTATAACAGGTACTGACTGTATGGTCATATAGCATATTAATATGCTGCCACTGAGCCACATAGCAAATACAAACACA…
CUST_2931_PI417904088	C198R069	RETSAT	RETSAT	RETSATA	All-trans-retinol 13,14-reductase (EC 1.3.99.23) (All-trans-13,14-dihydroretinol saturase A) (RetSat A) (All-trans-retinol 7,8-reductase)	LOC100196171	RETST	XM_014204006.1,100,100.000,60,2.54e-24	-	putative all-trans-retinol 13,14-reductase (LOC100196171)	ttggcgtCTGCAGTCCTTGTTCCCACACGGAAGTGTGTATCCACTTAAAGTGAGAAGGTGCGCTGATTTGGTAAAATGTGGATCATTATAGCAATCATTTGTGCGGCTCTAGCTGCATTCTTATACAACTATGTGTTCCGTACGTCCGGACCAAATCCTTTTGATATCGACACTCGTGAACCGCTTAAACCACTGGTCACCCAAAAGAAGGAGAAAAACAAAGTTCTGAAGCAGGGCTTCTTGGCCAGTAAAGTACCTGAGAAACTAGATGCCATTGTCATTGGCAGTGGAATTGGTGGTCTTGGGCTGGCGGTGCTGCTAGCTAAGGTTGGAAAGCGGGTCCTGGTTCTGGAGCAGCATGATCGGGCCGGAGGCTGCTGCCACACTTTTACAGAGAAA…
CUST_14518_PI417904088	C202R067	S10A5	S100A4	CAPL MTS1	Protein S100-A4 (Calvasculin) (Metastasin) (Placental calcium-binding protein) (Protein Mts1) (S100 calcium-binding protein A4)	S10A5	-	NM_001141600.1,100,100.000,60,5.18e-26=XM_014151011.1,100,100.000,60,2.54e-24	XM_021598332.1,100,100.000,60,1.77e-24	S100-A5 (s10a5)	ggggaaacaagcaaatacctgccaaatacaattaaggaataagcttctctctttcacaccctcaaaacaagatagaacatAATCTTGACCTTTAAAACATGAATTCATGCAAATGATAGCGTTGGCACATGACCATTTGAGATCAAGTCTGATGGAGCAGGTTGGGTGGAGCTGACATCATTTTCAGGGCATCAATGGCTGCTTGTGGGCTGATCATGTGTCTGCTCTGCTTGAGGGGGTGTTTTTCACTTTAAGAGGAAGCTTCTCTTCTCTCTGTCTCACATCAGTCTCACACCAGGACCCAGCCTGACAGCTACACATATCATAGATCCTATCTTCTGCTCTGAGGTACAGTATGTCTCGTCTGGAGAAGGCCATTGTATCCATGGTGGAGGTGTT…
CUST_40613_PI417904088	C137R069	ABI1	ABI1	-	Abl interactor 1 (Abelson interactor 1) (Abi-1) (Eps8 SH3 domain-binding protein) (Eps8-binding protein) (e3B1)	LOC106579709	-	XM_014159858.1,100,96.667,60,1.98e-20	XM_021622300.1,100,100.000,60,1.77e-24	abl interactor 1-like (LOC106579709), transcript variant X3	tgcactcgcatctcggtgtgcaccggcgttcagaaaaccgtgtggggagcaggaacgggaaaattgattctgcgcatcccTCTTCAATGTGGCACGGGCCCGGCTGTTTGCCAACCCATCCAGTGGACATTTCGCAAATTTCGAACAATTACACCTCTGGTTCCAGGTTTGCAACGGGCACTACGCTCGGCGCGGTCGTACCTCCAGTTTCCAGCAGCAGCAGCAGATCAGTACATTAACGGGGGACCTCAACTACCCCCCAGAACTCAACTGCCCCTCCTCCCCCCATGCCCCAGCTGACTCCACAGATACCTCTGACAGGCTTTGTGGCCAGGGTGCAGGAGAACATTGCGGACACCCCAACTCCGCCTCCCCCTCCTCCGCCCGATGACCTGCCCA…
CUST_1815_PI417904088	C104R049	PGA58	-	-	-	LOC106570785	-	XM_014143281.1,100,100.000,60,2.54e-24	XR_002468590.1,100,96.667,60,3.84e-21	predicted GPI-anchored protein 58 (LOC106570785), transcript variant X1	GAGTTCAGTAACTGTTTTATTCAAACCGTTATAACATGGACCAACATGGTCATATTATATACCCTTATAACATGGTTGTAACATGGTTGTAACATGGTTGTAACATGGTTGTACAGGTCAAGCCAGCTGTAAAAACAACATCATGTAATTGTCTGATAGTTGTTGGCTTCAATTCTCAAATATGTGTGAGTAAATAGATTCAAGTTGTTCCTGAATGAATTATTCTGACAAATTAGTGTTGGTCGCTTAACACTTGATCCCACATACTTGATCTCACATACTTGATCCCACATCTTTACAAGGGTGTAATACGAACTCTAGTCACCAGAAATGTAGATTTTAGATTCAAGCAAAAGTTAATAAGCATTTATAAGTTACTTTGAAGTAATTATCTAATGA…
CUST_32231_PI417904088	C137R125	MMP14	-	-	-	LOC106569443	-	XM_014140798.1,100,100.000,60,2.54e-24	XM_021613808.1,100,98.333,60,8.25e-23	matrix metalloproteinase-14-like (LOC106569443)	AGGATCTGGCGGAGGTGCGGGCGTGGCGGCGGCGGTGGTGGTTCCCCTCATGCTGCTGGCGTGTGTGATCCTCACTCTGGGGGCACTGCTGTTCTTCCGCAGGTACGGCACCCCACGCCGTCTCCTCTACTGTCAACGCTCACTACTGGACAAGGTGTAGAGGGGAGGAAAGCGAGAGCGAGAGAGAAGGAACGAGAGGAGGTTGAAGAGTGGAGAGGGACTGTATATGAGAGAAAAGAGCAAGCAGAGGGAAATGCGAGTGGAGATGAGGGAGAAAAATGAGAGAACTAAAGTCAAAGGGATCTGTGGACTGTGAGCGAAGGTTAGCCAGAGCAAGATATATTTGTTAGCTGTAGCTTAGATATTCCTTACCGGGGCAACTTAAATATGGAATAGATT…
CUST_14558_PI417904088	C162R013	OSTM1	OSTM1	GL	Osteopetrosis-associated transmembrane protein 1 (Chloride channel 7 beta subunit)	OSTM1	-	NM_001252359.1,100,100.000,60,5.18e-26=XM_014205478.1,100,100.000,60,2.54e-24	XM_021600696.1,100,98.333,60,8.25e-23	osteopetrosis associated transmembrane protein 1 (ostm1)	TGGACTGTTATTGTGTGTGAGCTTTGGAAGGTGCTTCTTAAAACTTCCCTATTTCACAAACATGTTTATTGTTCAGGTGGGTGCGTTATTGATAGCGTTGACATATTACGCCAATGCTCAAACGTCTGTTGTCGCTGTAAACACCACCATCCCTGGTTCAGAGCAGAGCGCAAGCGGCTTGAGGCAACTCGCCGCGGCAGTGGTGCCTCAGTCGTCCGTGTTTCACCCCAGTCTCCGTTCACAGTTCTCTCTCAACCTGTTGTCGGCGTTTCCAGAAGATCTGGAGGTCAGCAATTACTGCGTCGCGCTGCTGGCTATCTTTGGGCAGCGATATTCAACGTATGTTAATTGTTTGGTGTCCGCCGCGCGCCCTGTCAAAGTGTGCCAAAACTGTTATGG…
CUST_13988_PI417904088	C196R158	SRC	-	-	-	LOC106572626	-	XM_014146978.1,100,100.000,60,2.54e-24	XM_021616680.1,100,98.333,60,8.25e-23	proto-oncogene tyrosine-protein kinase Src (LOC106572626), transcript variant X4	caatacgagtcattatttatttttttGATTGCAGAGTACCACATAGTTTTATAGATAGATGGACACAATATGAACACAACGTATAAAGATAAAAGTGGAACAAATAAGGATGTAATTATATAAAGAAAATACACCACTTTCTTCACCGAAAGATAGACATGATGGCCAGTGGTAGAATGATGCTGAAAATAGACAAGACAAACCAAAAGTATCTTTAAAAAATGAATAAATTACCAACAGGATATATACAAAAATATTAGCATTGAGGATATTTATGTACAATTTCCCAATGACAGTGGATATTCAAAATGCCAATTCAGCTTCCCCAGCCACTGGAAAGCTCAGTCCTCATATCTTCAGAATCATCTCTCCATCATTCAATGAAAACAAAACCACATT…
CUST_5939_PI417904088	C222R165	PAPL	PAPL	ACP7	Acid phosphatase type 7 (EC 3.1.3.2) (Purple acid phosphatase long form)	PAPL	ACP7	NM_001140103.1,100,100.000,60,5.18e-26=XM_014169288.1,100,100.000,60,2.54e-24	XM_021574437.1,100,98.333,60,8.25e-23	acid phosphatase 7, tartrate resistant [putative] (acp7)	TCTTTTTTTTTTTTTTTTTTTTTTTTTTTTTTTGGAAAGACAGGATTTATTGATATAGTTAAAAGTCTGATGCCTTGTTTTACAGTACCATTCTTAACAAGACAGTAAAATAAGATGATTTACATTGATCATAGCATTTTTCTATTGGTTCTTTAAACAACAGTTTGTTTGTTCCTTTCTCACTAACAATATACATTTTTTTATGTTAAACATTTAACAGATACATATAAATCTAAGTAGCAATATGAGTAGACTGTTATAAAATGTAGGCCCCTTACAACCATTTGTCAGGGGAAACTAATCACATTGTGTCCATTCGAATGAAACTAAGATGTATAGAGTTATGATTGTGATCTACTGTATAAAATAACTGTCACCTCAGGTTTGGGCCTCTCCCAC…
CUST_18453_PI417904088	C058R125	RNT2	RNASET2	RNASE6PL	Ribonuclease T2 (EC 3.1.27.-) (Ribonuclease 6)	RNT2	-	NM_001140972.1,100,98.333,60,2.41e-24=XM_014213709.1,100,98.333,60,1.18e-22	XM_021587534.1,100,96.667,60,3.84e-21	Ribonuclease T2 (rnt2)	gggggacattagcagggaactgtcattgTAGATCAGTCACACATGATCAGTCACTCTCTCTGACTAGCATCAATATGCTTTCACCAGTGCTGCTCATGGTGGCCTTGCTGACTGTCCTTACCGTCACCATGGAGTCTGACCACTGGATAACAGACCAGCAGGAAAAGTTCTGTACATGGCAGTGTTTGAAGTTTACTCTGCAGTGGCCTGGGAGCTTCTGTTTGGGTCTAAAGAATTCATCACAATGCAGAATACCTCCAAACATCCAGACCTGGACTATCCATGGACTGTGGCCTTTGAAAGCTCATACATGTTGTCTCTGCTGGCCAATATTCCACTCTGACCTCAAGGAACTGGACCCTGAACTCTCTCAACTTTGGCCATCCCTACTCAAGACCC…
CUST_7838_PI417904088	C166R152	SH3GL1	-	-	-	SH3GL1	-	XM_014216452.1,100,100.000,60,2.54e-24	XM_021603906.1,100,100.000,60,1.77e-24	SH3-domain GRB2-like 1 (sh3gl1), transcript variant X2	GGACACAGACATGAAGAACCGAACTAAACCAGACTTAATTTTTTAAAGTAATGTTTTCTGTCAACCACAGATATCCCAATAGAAAGGGAAGTTTCAAATGAAATGAATTTAGAATTGAAATGGTCAAAATCAATTTATTTAACGTTAAATGACATACAGATAAGCAGCAGAATACATTTTACATCGGCAGTTTAGCTGGTTCTGACTCTGTAAAAACTGTACAACTTGTAAAGCCTTATTTTCATAACTACAGACATTTTAAAAGTAATTTGTCACATCCAAAGTTTCTGTAGGTCCCACATTTCAGTATGGACTCTGGTGAATACTTGCCTTATTTCCAAGGCAAGTATGTCAGACACACTGCAACTGCACAGCCTTTCCAAATGATGGAGTCTGACT…
CUST_6444_PI417904088	C241R145	SUCLA2	SUCLA2	-	Succinate--CoA ligase [ADP-forming] subunit beta, mitochondrial (EC 6.2.1.5) (ATP-specific succinyl-CoA synthetase subunit beta) (A-SCS) (Succinyl-CoA synthetase beta-A chain) (SCS-betaA) (Fragment)	LOC106582245	-	XM_014165122.1,100,100.000,60,2.54e-24	XM_021579491.1,100,96.667,60,3.84e-21	succinyl-CoA ligase [ADP-forming] subunit beta, mitochondrial-like (LOC106582245), transcript variant X2	tCTAATAttaaggCAGTATTATTGACTccacattttggTaTGATGTGTTGTgGTCCcTATTTTCAAGAATCTTCAAGTCTAATTTATCCTTGAAGTGGGtctcCAAAGACGGTGCTTGCAACAGGAGGTAAGcccTGCTCTGTCAGTGCACAATTCGGTTTTAACCCAGTACTAGTACCCAGTGCTCTAGAGATAAAGTTGTATTCTATTTTCCATTGGTTAGAACAGAAATTTGAATAGAGGCTGAAATTATTATACATATGTTACGCAACTGCAATACAGAGATTCTTACGTTTTCTACATGCCAGACTAACACTACTATGCTAATATCAACAGTATATAAGATAATTTGGAGTCACATGAGCCTGGTCATTATATACATTTGCGCTTTAGCAATTC…
CUST_6278_PI417904088	C193R036	SCYB7	CXCL11.1	CXCL11AA	C-X-C motif chemokine 11-1	SCYB7	-	NM_001141223.1,100,100.000,60,5.18e-26=XM_014143455.1,100,100.000,60,2.54e-24	NM_001129984.1,100,96.667,60,3.35e-23=XM_021622384.1,100,98.333,60,8.25e-23	Platelet basic protein (scyb7)	GGGGGACAACATCCATCACTTGACTGAGCTGTCCATCCAGACTCTTAAAGAAACTGAAGAAGCAGTATCCATGACCAACATGATGACATCAACAGTCCTCATCAGCTTCCTGGCCTGTCTGCTCCTGGTCAATGTTGAAGGCCAAGTGGGTCATTCTAAAACTCGGTGCCTGTGTCTGAATGGAATGGTGAACCACGTTAAACCTGTTCTCATTGAGAAGCTCGAAGTGTACACCTCCAAACACTCCTGCCAGAACATGGAGATCATTGTCACTCTGAAGAACGGAAAAGGGATGAAGTGTCTGAATCCAGAGGCTCCATTTGCCAAGAAAACCATTGAGAAAATAATGAAAAACCAAAGGAGTGTGCAGTAAATCTGTGAACTAATGACACCAATTCC…
CUST_16381_PI417904088	C084R019	-	-	-	-	LOC106604241	-	XR_001328632.1,100,100.000,60,2.54e-24	-	uncharacterized LOC106604241 (LOC106604241)	AAATTAGTATCTTTATTCATCTGTGTATTCCTGTGTACAAAAATCAACATCAGGTTAGACTGGTCTGTTTGTAGTATAGGTAATATAATACTGTACATCACTTTACAATATAAAACATAGCATTTTTACAACTACTGTACATGAGGAGGTTCCAACACATTGGGTTGTGATAACAGCAGGTTGGCATAAACACTTACTAATCACAAGATACTGTGGAGTCTCTGCTTCCCCCCCACTGATTTGTTTCCTTCATATCTGCATATGAAATGGCACCCATTCATGTTCTCCTGTTGAAGAGATACACGTTCATGTTCTCCTGTTGAAGAGATACACGTTCATGTTCTCCTGTTGAAGAGATACACGTTCATGTTCTCCTGTTGAAGAGATACATTTAGGTGT…
CUST_10761_PI417904088	C032R155	DPP7	DPP7	DPP2	Dipeptidyl peptidase 2 (EC 3.4.14.2) (Dipeptidyl aminopeptidase II) (Dipeptidyl peptidase 7) (Dipeptidyl peptidase II) (DPP II) (Quiescent cell proline dipeptidase)	DPP7	-	XM_014171601.1,100,100.000,60,2.54e-24	XM_021605600.1,100,100.000,60,1.77e-24	dipeptidyl-peptidase 7 (dpp7)	ttgggttatttacagaggctttcacccacagccttttcaatatgacaaattggggttttatttgcgttgttgtctttctcTCCTTCTACTCTGAGACGCAGGGGCTTACACACAGCCGTTTTCAGGTAACTTTTTTTACCGTAGACGTTCAGTGTTCACTGTTACTGGGCTTTACTAATGTCTGGAGCATGGCTGGTAGTATGTCTAGCTAGCTCTCTTATGCACGAGCAACCATTGCATTTCTTAAACGCTGTTCATAGTTACCAAATTATGTTCGTAGTACACGTGTTCATAGTAATGGCTAAGACTAGAGAGACTGCTGTTATTTCATTCACTCTAGCATGTTTATGATCTCAGATGTTACATTATAGGCATATCAGGTTTGTTCCTCTGAATATT…
CUST_5197_PI417904088	C194R054	GSTA2	GSTA2	-	Glutathione S-transferase A2 (EC 2.5.1.18) (GST class-alpha member 2) (Glutathione S-transferase alpha-2)	LOC106612567	-	XM_014213842.1,100,100.000,60,2.54e-24	XM_021580956.1,100,100.000,60,1.77e-24	transmembrane protein 14A-like (LOC106612567)	ggtggaaaaaggtgtggcgttacataactttgcaagttaacttttttggtgttcACACAGGTATATACTTCTCTCCGACACACAAGTAAACTTCAATTTCACCATGTCTGGAAAAGTGGTGTTGACTTATTTCAATGGGAGGGGGAAAATGGAGTCAATTCGATGGCTTTTAACAGTTGCTGGAGTTGAGTTTGATGAAGTGAATCTGACAAAGCACGACGAATATGTAAAGCTGTTGAGTGATGGAGCACTCATGTTTGAGCAAGTTCCATTGGTGGAAATTGATGGAATGAAGCTGGTTCAAACCAAGGCTATCCTAAGCTACATAGCAGGGAAATACAATCTTTACGGGAATGACCTAAAAGAACGAGTCATGATTGACATGTATTCTGAAGGTGT…
CUST_22448_PI417904088	C128R084	TMEM91	SYNDIG1L	TMEM90A	Synapse differentiation-inducing gene protein 1-like (Capucin) (Dispanin subfamily C member 1) (DSPC1) (Transmembrane protein 90A)	LOC106605631	-	XM_014201489.1,100,100.000,60,2.54e-24	-	transmembrane protein 91-like (LOC106605631)	ggggagggggagagagaacataattgcttgctttacacagcttgtaggcaggcAGACAGTTTAGGCAGAGATACACAGAAGAACACTTAGAGAGATTGAGAGGAGGCACAAAATAAAGAAAAAGAGAAGCAAGACAAAAGGGAAACAAATCACCAACAGCACAAAAAATGGATCCCAACAAGATGCCAAACGCCCCACCACCAGGCTGGAACCCAGATGAGAAGTCTGGGATGGGACAACCAGCTCCTCCACCCTACCAGGACCACCCCCAGTACCCCAACACAGGATACCCTGTACCAGCAGGCTACCCCGCCAATCCCCAGGGCTACGCACCACCGCCCCAGTATGGAGGAGCTCCTGGGGCCCCTTACGGACAGCCATACCCCCAGGGAGAGTACC…
CUST_20089_PI417904088	C236R042	NDUFA7	NDUFA7	-	NADH dehydrogenase [ubiquinone] 1 alpha subcomplex subunit 7 (Complex I-B14.5a) (CI-B14.5a) (NADH-ubiquinone oxidoreductase subunit B14.5a)	LOC106573873	NDUA7	XM_014149291.1,100,100.000,60,2.54e-24	XR_002469560.1,100,100.000,60,1.77e-24	NADH dehydrogenase [ubiquinone] 1 alpha subcomplex subunit 7-like (LOC106573873), transcript variant X2	gggggaggctcagaaatcttttatcgggggcaagccacagctagatctcatcacattgagtatttagtacaagtgtcactTATTTCAAGTTGCCAACACATTTGAAGAGTTTGCAGCCTGTCGAACTGCCTAAGGACACAGCTAACGTTAGCTAGCCAGGTGGCTTGTTACTATAGTTTGCTGACATTGTATGTTGGAAATGAAAGACTCTTTAAAAGCAGGTTATTACTCTTAATTCACCTTATCAAATGTCCACAGCATGATCTGCAAGCAAAGCTATAGTTGCGTTACGGTGAGATTGCAAAGAGGACCCTACCACCACCCAAACTTCCTGTTGGGCCCAGCCACAAGTTTGCCTTCAATTACTATAATGGCAGAGATGGGCGTAGAGAGTCTGCA…
CUST_3204_PI417904088	C148R169	GRAA	GZMA	CTLA3 HFSP	Granzyme A (EC 3.4.21.78) (CTL tryptase) (Cytotoxic T-lymphocyte proteinase 1) (Fragmentin-1) (Granzyme-1) (Hanukkah factor) (H factor) (HF)	GRAA	-	NM_001141037.1,100,100.000,60,5.18e-26=XM_014143478.1,100,100.000,60,2.54e-24	XM_021622235.1,98,98.305,59,2.97e-22	Granzyme A (graa)	ACTATCGCATGTGATTTATTTACAACTAGTACAAGACTTGACATGTCAGGTTGAACATATAACAACTAAAAGGAGAGTAAAACACCTGAAATGTCTGTTTGTTTTCACATTTTAATTTTAGAGAGCAAAGATTGTCAAGAGTTCAAACATACTTCACAGCTTCCAGCACATGAGCTATAATTCAAATTCAGTAAACATTAAATAATTTCACAATTATTGAGAAAAGCCTGAGAAAGCAGGTGTCAATCAGTCAATCAATGACTTCCGCATGGTTTTGTTGATCCAGTCAAGGTACATTCTTGATATGAGTGTGTACACTCCAGGTTTGGTCTTGATGCCACATTTTATACCGAAGGACACGACTCCCCTTAGCTCACCTCCACACACCAACGGGCCACC…
CUST_18666_PI417904088	C090R116	AIFM2	AIFM2	-	Apoptosis-inducing factor 2 (EC 1.-.-.-)	AIFM2	-	XM_014154057.1,100,100.000,60,2.54e-24	-	apoptosis-inducing factor, mitochondrion-associated, 2 (aifm2), transcript variant X2	acTTTGCTGAGGAAGTGCAGTGTGAAGGGAAATATTTCCACAAGTGCTGCTTTCTGTGCATGGCATGTAAGAAGAACCTGGACAGCACAACAGTGGCCTGTCATGTGGACGAGATCTACTGCAAGTCCTGCTACGGCAAGAAGTATGGGCCAAAAGGCTATGGCTTTGGCGGAGGAGCAGGCACCCTGAGCATGGACACGGGGGCACATCTTGGAATCAGACCTGAAGAGCCAGCAGCCCACTGTCCCACCAACAACCCCAACACCTCCAAGTTGGCCACCAAGTTTGGCAGTTCAGACGTGTGCCCGCGCTGTGCCAAGGCTGTGGCTCACCACACAACAGCGGCGTTCATCCGCGTGGTAGGCTCGGAGTTTGTGCAGAAGTACGCGGGGAACTGAG…
CUST_34656_PI417904088	C230R105	MRC1	MRC1	CLEC13D CLEC13DL MRC1L1	Macrophage mannose receptor 1 (MMR) (C-type lectin domain family 13 member D) (C-type lectin domain family 13 member D-like) (Human mannose receptor) (hMR) (Macrophage mannose receptor 1-like protein 1) (CD antigen CD206)	-	-	-	-	0	CAGTCCCGGCCCCGACAGTGTTACCTAGAGGCTGGGTGAAGCTGGCCAACGACTCTTACAAGGTGCTGCCCCAGAACTGTACATGGCCCGAAGCCCGGATGCAGTGTGAGGCTGAGGAGGGCCAGCTGGCTAGCACCCTGGATGAACTGTCAGCAGCCTACCTGGAGCTGCAGGCTCTGAAGCTGCAGACACCACTGTGGATTGGACTCAATAGGAATGAGACACAAGGCTTCTTCAGGTGGATGGACGGCTGGCCCTTAAGCCTGGCCCGGTGGGCCCCAGGCGAACCCAGCAGAGACCGGCCCTGTGTCTACCTGGATGTGGAAGGCACCTGGAAGACAGCCCTTTGTAACCACCCCTACCCCAGTGTGTGCAAGCAGTCCACAGCCGTCCCGCCCA…
CUST_23837_PI417904088	C194R010	MUL1B	MUL1	MUL1A	Mitochondrial ubiquitin ligase activator of nfkb 1-A (EC 2.3.2.27) (E3 ubiquitin-protein ligase mul1-A) (RING-type E3 ubiquitin transferase nfkb 1-A)	MUL1B	-	NM_001279087.1,75,95.556,45,8.79e-14	XM_021614113.1,98,93.220,59,1.07e-16	Mul1b protein (mul1b)	tttcaggttattcgttccgtttgactgtgtgtgttttagaatagattgacaggatgagtgaccttcccatcttcaacccaTTGGTCCTGATCGGTGTGGGCTCCAGCTTTGCCTTCTCTGGCTTGTTTTACCACTTATACAAAGAGAAGAAAGATGAAATGGTCAAGCTGAAGGAAATACCCAAATTCATCCCGGATCAACACTTGGTAAGGATCCTCAAGGCATCGCCTCACAGAAAACTGCAGTACGTCGCAGTAGAAGGTTTGGTCCAGGCGGACGGTGAGACTCTGGCCAGTCAGTTTGTCCCAAGATGCTTTGGTGTGATCCAGAAAATAGCTGTAGAGGAACACTGGAAAGTGTGGAACAACATCACTAGAACATGGTACTCCAGAACGACCA…
CUST_34125_PI417904088	C252R083	DPP6	-	-	Uncharacterized protein DKFZp434B061	LOC106579565	-	XR_001322680.1,100,100.000,60,2.54e-24	-	dipeptidyl aminopeptidase-like protein 6 (LOC106579565), transcript variant X5	CTGGTTTCCACAATCCACATGATATGCAACCTCCTCTTGGTTTAAACCTTTTGTTTTGTTTTCACCTTATGTGATTCCCCTGCGTTTCAGCATGATCATCCCTGAGACTGCCACGTTGCAGATCAACCCTGAGACTGCCACGTTGCAGATCAACCCTGGGACTGCCGCGTTGCAGAACATCCCTGAGACTGCCGCGTTGCAGAACATCCCTGAGACTGCCGCGTTGCAGATCATCCCTGAGACTGCCGCGTTGCAGATCATCCCTGAGACTGCCGCGTTGCAGATCATCCCTGAGACTGCCGCGTTGCAGATCATCCCTGAGACTGCCGCGTTGCAGAACATCCCTGAGACTGCCGCGTTGCAGAACATCCCTGAGACTGCCGCGTTGCAGAACATCCC…
CUST_16899_PI417904088	C128R036	AIFM2	AIFM2	-	Apoptosis-inducing factor 2 (EC 1.-.-.-)	AIFM2	-	XM_014154057.1,100,100.000,60,2.54e-24	NM_001165245.1,100,98.333,60,7.21e-25=XM_021567740.1,80,97.917,48,3.86e-16	apoptosis-inducing factor, mitochondrion-associated, 2 (aifm2), transcript variant X2	acTTTGCTGAGGAAGTGCAGTGTGAAGGGAAATATTTCCACAAGTGCTGCTTTCTGTGCATGGCATGTAAGAAGAACCTGGACAGCACAACAGTGGCCTGTCATGTGGACGAGATCTACTGCAAGTCCTGCTACGGCAAGAAGTATGGGCCAAAAGGCTATGGCTTTGGCGGAGGAGCAGGCACCCTGAGCATGGACACGGGGGCACATCTTGGAATCAGACCTGAAGAGCCAGCAGCCCACTGTCCCACCAACAACCCCAACACCTCCAAGTTGGCCACCAAGTTTGGCAGTTCAGACGTGTGCCCGCGCTGTGCCAAGGCTGTGGCTCACCACACAACAGCGGCGTTCATCCGCGTGGTAGGCTCGGAGTTTGTGCAGAAGTACGCGGGGAACTGAG…
CUST_1454_PI417904088	C210R125	NELFD	TH1L	NELFCD-NELFD TH1L	Negative elongation factor D (NELF-D) (TH1-like protein)	LOC106583261	CATZ	XM_014167213.1,100,100.000,60,2.54e-24	XR_002474222.1,100,100.000,60,1.77e-24	cathepsin Z-like (LOC106583261), transcript variant X2	ttggcagatatctgattactagcaagttagcttaggcaaaggctatctaaTTGTTTTGAAAACACACTCTGTATTGTTTTCTAAAGTATTAGCTAGGCCTGCTTTATTATAACTCGCCGTGTGCTTCACATTATAAACCCTACTCATTCTCTCGTCATCATGGACGAGGAATATTACGAGAGGAATATTGGAGACTGGGATGGTCCGGATGGCAATCAGGACGACTATGTTGAAGGGGAGAATGATGGGAAAGTTCAGGAGGACTGCCTACAGAAGTTCTCCAGCAGAGATTACATCATGGAGCCTGCTGTATTCAACACCCTTAAAACATATTTTCAGGCTGGTGGCTCCCCTGAACACGTCATCCAGCTCCTGTCTGAGAACTACTCTGCTGTGGCC…
CUST_23512_PI417904088	C025R082	IFNG	IFNG1	-	Interferon gamma 1 (Interferon gamma) (Interferon gamma 2)	IFNG	-	NM_001123558.1,100,100.000,60,5.18e-26	-	interferon gamma (ifng)	ttttttttttttttgTTAATGTCAGTTTATTCACTCATAGAACTTACAGATCTTGCTTCAACTGCAAGAAATAACTCTTTATATTCCAAGAGAAAAGCATTTTCTAATTAATAAATAATAAATATGAATTAGCAAAATAGATTTCTTTTGATTCATGAAAAATAAATACTCTTTTGACAATGATAAATAACTTAATAATAGAATAAATATCTTAACAAAATAAATAGAGTTTTGTATCAAGGATGTATGTAGCTTCAATATGTATCTCCACTGTGGCTCCGGAGGGCAGTTTCCCCTTGGTACACACAGATCTAGAATCAGCTCCCCCTCCCACAATCCTAACCTTCACCGTTAGAGGGAGAAATGCTAAACTGACCCAAGATCAGCTTCCAGGTGTAA…
CUST_4120_PI417904088	C191R048	TMEM33	TMEM33	DB83	Transmembrane protein 33 (Protein DB83) (SHINC-3)	LOC106611544	TMM33	XM_014211846.1,100,100.000,60,2.54e-24	XM_021584161.1,100,100.000,60,1.77e-24	transmembrane protein 33-like (LOC106611544), transcript variant X2	tcttttttttttttttttttttttttttCCTTTAATATTTTATTGATTTAAGATGGATGAATTTATTCCAGAGCTACACAAACATGTTCTCTACAAGTAAATAATAAATACATTTAACATGGCAATGTGGGCATGCAGTGAACTGTAAAACTAGGGGTATTAGCCACGAATCAGTTGAATTGAAGACTTTTTTAATTAGAAAACCTATTCAAAATGCAACTATACACTTGCATTTGAAGCCAGCCTAGTCCTTCCCATTTACTGCATACCATGTGATTTGTGCACAGACTGAGGAACTGCTGGTATAGTGAAACCGTTTAATTTTTAGCATAAATCCTTTTGACTGCATGTCCTTGTACCATTCAAGTCTTCAGAAGTACAGCAGATATTCCCCTTTCT…
CUST_41243_PI417904088	C030R081	MX2	MX3	-	Interferon-induced GTP-binding protein Mx3 (RBTMx3)	MX2	-	NM_001123690.1,95,92.982,57,1.13e-17=XM_014133086.1,95,92.982,57,5.54e-16	XM_021569610.1,95,100.000,57,8.25e-23	myxovirus resistance 2 (mx2)	ggcacgaggggacaCGCAGTGGTCATCAGATAGCAGAACACCTTGCTGTTTATTTAAGTTTTATCACTAAATAATAATTCACAATGAATAACACTCTAAACCAACATTATGAGGAGAAGGTGCGTCCCTGTATAGACCTCATCGACTCCCTGCGCTCCCTTGGCGTAGAGAAGGACCTTGCGCTGCCAGCCATCGCGGTGATAGGGGACCAGAGTTCAGGGAAGAGCTCAGTGCTGGAGGCGCTATCTGGGGTGGCTTTGCCAAGGGGGAGTGGTATTGTAACACGATGCCCTCTTGAGCTGAAGATGAAGAGGAAGAAAGAAGGAGAGGAATGGCATGGAAAAATCAGCTACCAAGACCATGAGGAGGAGATTGAGGATCCCTCTGATGTGGAGAAGA…
CUST_21163_PI417904088	C117R066	BTG2	BTG1	-	Protein BTG1 (B-cell translocation gene 1 protein) (Myocardial vascular inhibition factor) (VIF)	BTG1	LOC106583494	XM_014167737.1,100,100.000,60,2.54e-24	XM_021610395.1,100,95.000,60,1.79e-19	protein BTG2-like (LOC106583494)	gggggattctgtcccttgataaaaaagaagCCACAAGCTGTAGTGCGAGCACAGACAACTTGGAAGTGGCACTTGAGCGAAAAATAACATCAAACGCCACTTCCAATCGAACAAATATTTTGGATAAATAATGCTGATTGTTACTTTGGCTAGAGCCAACTTGTTGCTTTGATATCACTGCTTCTGACTTGAAGATTCATTTTTGCTGAAGGATTCGTCCAGGACTCGCATAGCTACTTCCGCTATAGCTAGCTAACGTTACTTCGGTTTCATACTGCATTACTGTCAAACTCTTTTATTTCCTACGAGCTGAAATAAAAATTTTGCTGGCAAAATGAACCAAGGATACTCATCTAGAGGTGAAATGGGCCCCGAAGTAACGGCCGCTGCGACGTTTGT…
CUST_35080_PI417904088	C158R129	-	-	-	-	LOC106588788	-	XM_014178213.1,100,98.333,60,1.18e-22	XM_021572485.1,100,98.333,60,8.25e-23	uncharacterized LOC106588788 (LOC106588788)	gggggATGACAGATGACGTCACCAGGAATGCAGGGCAGTGGTGGATTGACCTGGAAAACGAGAGAGAAAAATAAATTCTGTGACTAACAATAACGAGAGATTGATTGCGGGGATTAACTGTCGGGTCTCGAAATCATTTATTTCAGCCGCAATGTCTGTGCTATTTTGTTGCCGCTGTGTTTTTCCTTCTGAAGACACCGACGAGAGACAGCCCCTACTGCACCCCAAGCTTCCAGAATCAGAGAAGCCAGTGTCGGCCAGACAGCCTCGACCAGCACCCACAGTGAGTCGGAGTGGTCAGTTGGTCCCGAAGCGTGTGGGTGTGAAGGACTTGGACCAGCGGTTCTCTGATGTGACCGAAACGTTCAACCAGCAGCATGAGAGCTATAATGTCATGAA…
CUST_51_PI417904088	C116R055	HNMT	HNMT	-	Histamine N-methyltransferase (HMT) (EC 2.1.1.8)	HNMT	-	XM_014165811.1,100,100.000,60,2.54e-24	XM_021579867.1,100,100.000,60,1.77e-24	histamine N-methyltransferase (hnmt), transcript variant X2	GCTGTGCTGCGTTGTTTTAGTCAAAACACATGACTTACGAGTGATTCTGTAGTCGTCTTGAAAGGAAAACCATTTAGCCATGTCGTGTGCTATGAGAAGTCTGGTGGAGGATGATGACAGATACCTGAAGTCCTTCCAGCTGTTCCTGGAGCGCTCCTCTGAACACAAGTGCATGCAGGACTTTATCCATGGCATCCTGCCTGACATTCTAGCCAGCATTGGAGAGGGAAAAGCCAACCTTAATATGATGGGAGTTGGAAGTGGAGCAGGTGAGATTGACCTTGAGATGTTCTCTCAGCTGCATCTGAAGCATCCTGCAGTAACCGTGGACAACCAGGTGGTGGAACCCAGCGCCCAGCAGCTCCACCTCTATAAGGTGTTGGTGTCCCAGAAACCAAA…
CUST_9922_PI417904088	C067R027	SLC46A2	SLC46A2	TSCOT	Thymic stromal cotransporter homolog (Solute carrier family 46 member 2)	LOC106568581	-	XR_001320347.1,100,100.000,60,2.54e-24	-	thymic stromal cotransporter homolog pseudogene (LOC106568581)	TATTGGATAGGATATGTCGTGATCAGTAAAGCGCAAATGTCTACAGTCACCCAGGCTTGGACAGGTGGCAGTCCTTGGTTAGGTTAAGGCGTTGGGAGTTTACTTGGTACATTTATTTTTGTTTTATATATAGTCTGCCTGTAGATTTCTATCGGGACTAATCATGTTGTCATTCGGGAAAATGCGTAAACGCATCGAGCCGGTTGTTTTATGTGCCCAAATAGCCAGCGCGTTTTTCGACACCTGTTTGCAGATGGTAGTCAAGGAGAGATGCGCCAACATGACCGATGCGCTCTATCCCACCCCTACCGAAGACAGCCGGCAGAAAGCCATGTCCAACTTCTACATGATATATAATATGCTGGCCAAGTTCATTCCGATCCTACCCGCTATTCTTTT…
CUST_3184_PI417904088	C103R035	SGCE	-	-	-	LOC110530630	-	-	XM_021613843.1,100,100.000,60,1.77e-24	protein lifeguard 3-like (LOC110530630)	aCttccctCAGTACTCAACTCAAGggtgTCAGCTAAGTACACCCTTTGAGgcgtgTtCCCTTtTGATTTAGCTCAACGATCAATAATTTAATCTCAATATAAAGTGGCTTCCTTTCTTCTCATCATGTAGAGAAGAACATCAGATGTTAATGCTTTGATGTGTACATTTTGGACTGTTCTCAGCATAGAGCCACACAGTGAAGGTTCCAATCGTTTTTCCACCATTCATTTTTCCCACAGGGGATTCTAGAATCCATACGGGTTGTGTTTCGTATAGGCCTACCATGGCGCGACGCTTCAACAACTATGCAAATCTCTCCCGGACAAGGTGACCTCTATCAACACACTCGTCTCTATTTACTTAGATTTGAAAATTCTAATTTGCATCAAAGTAGACCA…
CUST_9998_PI417904088	C201R032	HAMP	HAMP1	HEP1	Hepcidin-1	HEPC1	-	NM_001140849.1,100,100.000,60,5.18e-26	-	Hepcidin-1 (hepc1)	ggggacagagAAGTCCCTCAACCGCTGACATCAAAAGGACAATCAATCAACTTTGGACTCGTCTAGTGCATTGAAAATCGTGCATTGGAGAGCGTCGCTTTTTGGGAAAATTGAAGAGTTCTGATCATCTTCATAAACTGTCACTTCAATTCCAACTGACTTCAACAGGACTCTTAAATAGGCTATAAGCTTCCTAACAAAACCGAGAATGAAGGCCTTCAGTGTTGCAGTTGCAGTGGTGGTCGTCCTCGCATGTATGTTCATCCTTGAAAGCACCGCTGTTCCTTTCTCCGAGGTGCGAACGGAGGAGGTTGAAAGCATTGACAGTCCAGTTGGGGAACATCAACAGCCGGGCGGCACGTCCATGAATCTGCCGATGCATTTCAGGTTCAAGCGTCA…
CUST_3297_PI417904088	C119R095	TOM1	-	-	-	LOC106607057	-	XM_014203623.1,100,100.000,60,2.54e-24	XM_021558215.1,100,100.000,60,1.77e-24	target of Myb protein 1-like (LOC106607057), transcript variant X6	GGGGCCACCCTCTTTTGGTATGGCTGCAGATACAATGATTGAGTTTTTTTCCTGTTACATTTTTTAGAAGAGAAGGGAATATGCCCAATATTTTCAGATGAACATTGAATGGTGTGCATTCCAGAAAATGCAGGCATGATAAACACAATGTTAGTAGATTGCAATAAGCTATAATTAGGGGAAATGAATTATGTGATGCTCATGATGAATCCCATTTGTAATACAGAACACTTTTTTAGGAAGAGCAATACAAACCTAATTGTTTCTGGAGTACTTGAAGTTTATGAAATATTACACAATGTCATGATGGAATACTGTAACATTAAACACAGATGAAGTCTT
CUST_17805_PI417904088	C106R044	USP18	USP18	UBP43	Ubl carboxyl-terminal hydrolase 18 (EC 3.4.19.-) (43 kDa ISG15-specific protease) (ISG15-specific-processing protease) (Ubl thioesterase 18)	LOC106609458	-	XM_014208322.1,100,98.333,60,1.18e-22	-	ubl carboxyl-terminal hydrolase 18-like (LOC106609458), transcript variant X7	caggtgctacctggaaaaattacagtttatttCTCTGTTGACAGTAGTGATATCGAAACAGAACAGAGTACCGGTAACTACTGCATAAACCAATTGTTCTGAAACAAGGTGAGTCACATATTTTCCATGTCAGGCAAATATTATCACCAATGAGTCAATGGCCTTCTTCAGGTTTTCCCCCAGAATACCTCAACTCAGCACACTCTTCAAACCACCCGTCTTATAGTGGTTTCAGAACGTGTGGTCTCTGAAGCTTACAAGATGACTGTACTAATGACAGGGTGAAGGGTGTTTGCCTCCACCTATTGGCTAAGCTCAGTAATGCCCTATGAATGTCCAACGTATCCAGCATAAACAAAACCTCAAAACATATACACACCCCACCAAATATACTTAAAC…
CUST_10614_PI417904088	C151R040	BACE2	-	-	-	LOC106612993	-	XM_014214777.1,100,100.000,60,2.54e-24	-	beta-secretase 2-like (LOC106612993)	ggagagAGCCTTTACTTTAATCTGGTCAATGTAATTATATACAATCACAACTTTGGCACTGATATACAGTTAAAACACATTTAAACAAACATGATCATGCTCAACAGTTTCATGTAAATCATCTGCACCTGATTCTGTATCAACACCTTTGCAAAATATTTTCTTTAACTTTTGATAGAAAAATACAGTACAATTTGTTTGGACAATACATCTCCACTTTTGAAATCATGGGTAATTTTGGGTGTTGTACAATTTAGAAAATATTAATTAGCATAGAAATATACGTGCCCTTACAAATCAGTTTTCTGTATGTCTACTAATGGCAAGTTTTTGAAATATTATACAATCACATTGACATTTCAAATATGTATAGCAGTAAAAGTACATCATTCAACAATA…
CUST_15465_PI417904088	C252R023	S20AA	SLC20A1A	-	Sodium-dependent phosphate transporter 1-A (Solute carrier family 20 member 1-A)	S20AA	-	NM_001140224.1,100,100.000,60,5.18e-26	XM_021621409.1,100,100.000,60,1.77e-24	Sodium-dependent phosphate transporter 1-A (s20aa)	ttgggcgccacttgatatagACCTCTTCTCCGATGACTGTTTAGCCTACTAGTGGACAAGTGACAGGATACTGCGGATGCTTGCTTTCTAGACACACAGGCTACGCGCAGTCTTTTCAATGTCACCTACTTATTGCAACAGGAACAGTGGAGCACCAGCCTTCGGAGAGACACTTTTTTAACGACATTATTGAACATCGTATATCATCAACCACCTGCTGAGTCTACCACACAATGGATGTCCTTTGCATATCATCGCAGTGTCTAAGAAAACTCTCAAACCAGCTTTGTATACTTAGATAACAATTATTGTTTTACCCTTCCCATTAGCCGCTTATTGAACAGAGCTCGGAAAGGAGTAAGAAAATAGCTATATTCTTTGATTTGAGGCAGGATACCT…
2_3_12_16	C043R167	FAM213A	PRXL2A	FAM213A PAMM	Peroxiredoxin-like 2A (Peroxiredoxin-like 2 activated in M-CSF stimulated monocytes) (Protein PAMM) (Redox-regulatory protein FAM213A)	LOC106579279	-	XR_001322620.1,100,100.000,60,2.54e-24	-	redox-regulatory protein FAM213A-like (LOC106579279)	cgctgggggataaggggccaatctgtgccaagggttgaccgcgtgcctccATTATTGAGCGTGTTCAGGGTCCAAGTTGTTTCGTGTTGAATTTCCTTTCCTTTCCTATTTCGATACAAAGACAACTTTTGCGATGGATGTTGTGGTCCAGTCATTGGGCGCAGTTGTTGCCTTAATCGCTACTGGTTTGCGCTCTTTCAGTGACTTGTTTTTGACGCAGCCATCGAGGGCCACTCTCAAACATTTAGAGGAGACTGACCTCAAACCATTGACAGGAGAGCGTAAGCCTTTGAAGGCCAAACGTTTATGGGAGAAGTCTGGAGCTGTTATCATGGCAGTAAGGCGGCCTGGATGATTTTTGTGCAGAGAGGAGGCCGCTGAGCTGTCCTCTCTGAAGCC…
CUST_5508_PI417904088	C191R040	PSL2	SPPL2A	IMP3 PSL2	Signal peptide peptidase-like 2A (SPP-like 2A) (SPPL2a) (EC 3.4.23.-) (Intramembrane protease 3) (IMP-3) (Presenilin-like protein 2)	PSL2	-	NM_001173826.1,100,100.000,60,5.18e-26=XM_014185602.1,100,100.000,60,2.54e-24	-	Signal peptide peptidase-like 2A (psl2)	ttggtgcgagtacagtaaacgggacgatattgaaactagtggtgtgccaaatcacaagattagtgttttttttttttcttTATACGATTTTTACTCAATTCTGTATGTTACCGACATGGCAAAAACTCAGTGGATTATTATTTTATCAGTCATTCTCCGGTCATCTCAGGTGATCTGTCAAGAGGCAATCTTGCACATCTCAAATGAAGCCACAGATAAAGAATACTGCCTGGTCTACAACTCCTTATGGACCAACCTGTCACTCTCACTCAGCGCTGCTACTGCGTATCCCCTGGTGAACCTGTCGTCCAGGCAACTGTGTAGCTCTGCAGGGGTGAGCCCAGCCATAGTGAGAGGCAAGGTGGTGGTGGTCATGGGAGGGGAGTGTAACTTCAGCCA…
10_1_15_4	C084R109	C209E	CD209E	-	CD209 antigen-like protein E (DC-SIGN-related protein 4) (DC-SIGNR4) (CD antigen CD209)	C209E	-	NM_001141449.1,100,100.000,60,5.18e-26=XM_014201809.1,100,100.000,60,2.54e-24	XM_021623186.1,100,100.000,60,1.77e-24	CD209 antigen-like protein E (c209e)	ggggacaCACACAGCAGAGATAGAGAGTAGCAGCTGCAGCAAAAGGATTTTGGGACAGACTGAGTATTGTGTTACAGGAATTAATTATAAATCTAAAAGGGGCACGTTGCTATAGAGACGGAGAGGGAGGTTTTTTAAAACCACAGTGCATTTAGCCTTCACAGTACTTTACAGTCGCAGTCGGTGGGTCAGGAACAGCAGCAATGTATATCAAGTTTTGCCGTATTGTAGGAAGTGGAGGGAATGCCAAATTACCAGATGAGGCAAACGCAAAGTTATCGGTTGAAGTGAAGGAGCAGCAAGGGAAAGACCTGCAGGTCCTGGGGAACGTTGGTCTGTACCGCACAGTGTGTTTACTACTGTCTGTCATCTGTCTGGTTCTACTGCTCGTCATCATCA…
CUST_21649_PI417904088	C146R101	HLA-DPA1	HLA-DPA1	HLA-DP1A HLASB	HLA class II histocompatibility antigen, DP alpha 1 chain (DP(W3)) (DP(W4)) (HLA-SB alpha chain) (MHC class II DP3-alpha) (MHC class II DPA1)	-	-	-	-	0	GATGTCTYCCTCCTCTTGGGTGAAGGTCAGACTGGAGAACTGGTTGAGGGTGAAATCAGTGTTGGGGCAGGGGGTGCTGAGACGCACTCCCTCGGTCACATTCTGATTGTTCCTGGTCCACCTGACTCTGACASGTGCAKGGTGGAAAGCACTGACGTGGCAGATGAAGGTGTTCTCCACCCCCAGTTCCACATCATCCCTGGGGTAGATGCTGCTGTGAGGAGGGGCTATTGCCTCTGGTGGGTTCTTGGAAGCTTTTATAGCTACTAAMCAKGTTTGCTTTGCATATCCCCAGATTACCTACAGCCTGTTCATAAMATCCARGGAAGGTAATCTGATCTGCAAACGGAGGCYGARCCACCACTCCCTCCTTTTTGTTGAASTCTGCGTACCT
CUST_2862_PI417904088	C095R022	SLC5A2	SLC5A2	SGLT2	Sodium/glucose cotransporter 2 (Na(+)/glucose cotransporter 2) (Low affinity sodium-glucose cotransporter) (Solute carrier family 5 member 2)	SLC5A2	SC5A2	NM_001140069.1,100,100.000,60,5.18e-26=XM_014162056.1,100,100.000,60,2.54e-24	NM_001124432.1,100,98.333,60,7.21e-25	solute carrier family 5 member 2 (slc5a2)	ttggctggcctttctcttatcggacgttaggaagggagccctctatttaatagacacttgtattatcattatcctttcctCCAAGTCCTGGACTGATACCCTTTGGTTTGACATTATTAGGGCCGTTGACGCCGTTCTTCATTTTTGTTGAGAAATGGAGAATCCCACGTCTGAGACCACACCGGCGACGAGGACCATTAATAATCTAGCTGATATCTTGGTCATAATCGGCTACTTCATTCTGGTCATTGGCGTGGGCGTCTGGTCTATGTTCCGGACCAACCGTGGAACTGTGGGAGGCTACTTTTTGGCAGGACGGACCATGACATGGTGGCCAGTTGGAGCATCACTGTTTGCCAGTAATATTGGTAGTGGTCACTTTGTGGGCCTTGCTGGTAC…
[truncated: 1,551 more rows]
